# Supplementary material
Source: publisher figshare collection journal article supplement (https://diabetesjournals.figshare.com/articles/dataset/_/13501587)
Supplement: Supplementary file 1 [file 1]

**Supplemental Figure S1.** A boxplot showing the maternal energy intake at week 36-38, median (IQR). Mothers in the intervention group had a trend towards lower energy intake compared to controls,  $p = 0.089$  (two-sided Mann-Whitney U test).

**Supplemental Figure S2.** Spearman correlations between CRP (mg/l) in week 28-30 of pregnancy and methylation (%). **A)** Methylation site cg17389519 shows a negative correlation with CRP levels,  $\rho = -0.31$ ,  $q = 0.017$  and **B)** methylation site cg27394563 shows a positive correlation with CRP levels,  $\rho = 0.31$ ,  $q = 0.017$ .
