# Supplementary material
Source: publisher figshare collection journal article supplement (https://diabetesjournals.figshare.com/articles/dataset/_/13501587)
Supplement: Supplementary file 1 [file 2]

## Sheet: S1. Altered DNA methylation
Supplemental Table S1. DNA methylation sites found to be significantly different in cord blood of the Lifestyle intervention vs. Control group (TOP-study)
														P-values						q-values based on post hoc FDR analysis of 379 sites
														Adjusting for different covariates				Other methods to adjust for technical variation and cell composition		Adjusting for different covariates				Other methods to adjust for technical variation and cell composition
TargetID - CpG site	Chromosome	Gene symbol, hg38, GENCODE version 22	Gene symbol, Illumina standard manifest	Relation to gene region, Illumina standard manifest	Relation to CpG Island, Illumina standard manifest	p-value*	q-value*	Bonferroni corrected p-value	Mean methylation (%) in Lifestyle intervention	SD, Lifestyle intervention	Mean methylation (%) in Control	SD, Control	Methylation level, Lifestyle intervention	With smoking†, p-value	Without GWG‡, p-value	With smoking and without GWG§, p-value	Only offspring variables||, p-value	Reference-based method¶, p-values	Adjusting for the top 5 PCs#, p-values	With smoking†, q-value	Without GWG‡, q-value	With smoking and without GWG§, q-value	Only offspring variables||, q-value	Reference-based method¶, q-values	Adjusting for the top 5 PCs#, q-values
cg17154542	10	C10orf76	C10orf76	5'UTR	N_Shore	2.80907e-09	0.00127362	0.00127362	18.589	3.02742	16.8121	3.12492	Higher	1.60726e-09	2.46861e-09	1.31445e-08	9.14205e-09	5.66158e-07	4.15559e-09	6.1019e-07	9.3613e-07	4.9387e-06	3.46406e-06	8.5728e-05	5.6927e-07
cg24996263	1	RP1-65J11.1				3.42993e-08	0.00777559	0.0155512	6.35624	0.71372	5.96142	0.599024	Higher	2.15946e-08	6.91084e-08	4.0766e-08	5.14526e-08	4.12572e-05	1.82756e-06	4.0932e-06	1.0991e-05	7.6908e-06	9.75925e-06	0.000221027	1.60444e-05
cg21753618	2	AC139712.2			Island	9.86678e-08	0.0142844	0.0447357	96.5698	0.892992	97.0251	0.608501	Lower	7.94326e-08	1.01043e-07	2.28198e-07	2.04043e-07	0.000140413	0.00016004	7.78845e-06	1.0991e-05	1.12629e-05	2.27692e-05	0.000324938	0.000280558
cg05839533	17	KRT36	KRT36	Body		1.26021e-07	0.0142844	0.0571375	89.6677	2.12231	90.5511	2.06548	Lower	8.21707e-08	1.15939e-07	2.101e-07	1.02272e-06	5.84736e-05	0.000145979	7.78845e-06	1.0991e-05	1.12629e-05	2.41612e-05	0.000239496	0.000264625
cg09354080	16	BANP	BANP;BANP	Body;Body		2.67512e-07	0.0163237	0.121289	94.5912	0.906667	95.1061	0.756663	Lower	2.7268e-07	4.74126e-07	1.04534e-06	4.90407e-07	4.35057e-05	1.53847e-05	1.107e-05	1.72919e-05	1.46611e-05	2.27692e-05	0.000221027	6.89e-05
cg00491255	16	TEPP	TEPP;TEPP	Body;Body	Island	2.73169e-07	0.0163237	0.123854	50.0385	7.70319	53.6299	7.17902	Lower	1.52169e-07	5.04044e-07	4.87863e-07	5.84914e-07	0.000421397	3.23295e-05	1.107e-05	1.72919e-05	1.25962e-05	2.27692e-05	0.000640874	0.000104078
cg11510131	12	PXN	PXN;PXN;PXN	5'UTR;Body;Body		2.93829e-07	0.0163237	0.133221	89.5286	1.75737	88.4848	2.01294	Higher	4.2049e-07	4.33582e-07	5.0853e-07	8.71563e-07	8.03834e-06	4.53074e-09	1.107e-05	1.72919e-05	1.25962e-05	2.36063e-05	0.000132323	5.6927e-07
cg07342080	19	AC074212.6;SIX5;AC074212.5	SIX5	1stExon	Island	3.17092e-07	0.0163237	0.143769	4.51097	0.623673	4.93475	0.680159	Lower	3.04969e-07	3.49827e-07	6.20547e-07	7.71029e-07	1.04299e-05	9.40363e-06	1.107e-05	1.72919e-05	1.30065e-05	2.27692e-05	0.000141	4.78892e-05
cg27506262	16	PMFBP1	PMFBP1;PMFBP1	5'UTR;Body		3.36838e-07	0.0163237	0.152721	95.8609	1.02109	96.2533	0.959968	Lower	4.36743e-07	2.48613e-07	1.81283e-06	4.73319e-07	0.000137789	0.000399524	1.107e-05	1.72919e-05	1.79571e-05	2.27692e-05	0.000322286	0.000584496
cg19134568	4	POU4F2	POU4F2	Body	Island	4.32847e-07	0.0163237	0.196251	16.5389	2.28135	15.3229	2.30759	Higher	5.28855e-07	5.84711e-07	5.55024e-06	3.05797e-06	9.32572e-05	2.0221e-05	1.107e-05	1.72919e-05	2.20309e-05	2.5387e-05	0.000287548	7.85093e-05
cg11168004	4				Island	4.78541e-07	0.0163237	0.216969	4.5945	0.557387	4.20821	0.565938	Higher	3.48125e-07	6.55425e-07	5.27511e-07	6.4544e-07	2.281e-06	1.13209e-06	1.107e-05	1.72919e-05	1.25962e-05	2.27692e-05	8.5728e-05	1.25297e-05
cg00369811	6				Island	5.12125e-07	0.0163237	0.232196	14.6141	1.50185	13.6618	1.26028	Higher	5.60267e-07	7.32878e-07	6.89047e-07	2.20592e-06	4.81895e-06	3.19596e-06	1.107e-05	1.72919e-05	1.31007e-05	2.5387e-05	0.000132323	2.46204e-05
cg14780282	4					5.1948e-07	0.0163237	0.235531	86.7366	2.33334	85.2338	2.52893	Higher	3.79448e-07	8.31165e-07	4.23721e-06	2.36709e-06	2.07183e-06	2.02303e-07	1.107e-05	1.72919e-05	2.17224e-05	2.5387e-05	8.5728e-05	5.17879e-06
cg07405330	3	MOBP	MOBP;MOBP	Body;Body	S_Shelf	5.33432e-07	0.0163237	0.241857	93.6169	1.4222	92.7002	1.6544	Higher	4.49081e-07	8.9905e-07	1.73839e-06	3.32403e-06	1.8988e-06	5.11462e-08	1.107e-05	1.72919e-05	1.79571e-05	2.5387e-05	8.5728e-05	2.40809e-06
cg07873812	19	AC003005.4;ZNF419	ZNF419;ZNF419;ZNF419;ZNF419;ZNF419;ZNF419;ZNF419	TSS200;TSS200;TSS200;TSS200;TSS200;TSS200;TSS200	Island	5.49168e-07	0.0163237	0.248991	4.4133	0.427704	4.12471	0.410465	Higher	6.63347e-07	7.98665e-07	7.31326e-07	5.89097e-07	1.51732e-06	1.36481e-06	1.107e-05	1.72919e-05	1.31232e-05	2.27692e-05	8.5728e-05	1.38573e-05
cg17197538	12	KRAS	KRAS;KRAS	TSS1500;TSS1500		5.76051e-07	0.0163237	0.26118	8.54168	1.27529	7.67949	1.16936	Higher	6.37065e-07	1.05006e-06	2.26368e-06	2.59365e-06	1.18285e-06	5.99747e-07	1.107e-05	1.72919e-05	1.87077e-05	2.5387e-05	8.5728e-05	8.07857e-06
cg04084597	11	DGAT2;CTD-2530H12.1	DGAT2	TSS200	Island	6.50118e-07	0.016828	0.294762	4.90364	0.680334	4.57824	0.552667	Higher	3.06128e-07	6.52954e-07	2.35121e-07	3.87261e-06	0.000497734	0.000101057	1.107e-05	1.72919e-05	1.12629e-05	2.5387e-05	0.000716122	0.000209214
cg11945604	12				Island	6.68907e-07	0.016828	0.303281	4.32282	0.446894	4.59586	0.492344	Lower	2.67993e-07	7.31478e-07	2.35458e-07	6.86832e-07	4.63902e-05	1.92184e-05	1.107e-05	1.72919e-05	1.12629e-05	2.27692e-05	0.000222815	7.78064e-05
cg01406758	17	PHF12;PIPOX	PHF12;PHF12	TSS1500;TSS1500	Island	7.36001e-07	0.016828	0.333701	6.81832	0.800444	7.32534	0.848013	Lower	1.09574e-06	1.01959e-06	2.14369e-07	1.39874e-06	1.61363e-05	1.91688e-05	1.26333e-05	1.72919e-05	1.12629e-05	2.5387e-05	0.00015228	7.78064e-05
cg12200270	10	PNLIPRP3	PNLIPRP3	Body		8.02988e-07	0.016828	0.364072	68.8311	3.71357	70.7638	3.59055	Lower	9.3048e-07	1.74948e-06	3.28144e-06	3.39544e-06	5.63141e-05	8.46339e-05	1.22456e-05	1.82518e-05	1.99445e-05	2.5387e-05	0.000239496	0.000187398
cg14234302	19	MIR4750;TBC1D17	TBC1D17;TBC1D17	Body;Body	N_Shore	8.25474e-07	0.016828	0.374267	81.7386	5.58838	77.5046	6.05652	Higher	5.61546e-07	1.29252e-06	5.66862e-07	1.81773e-06	2.97316e-06	1.61586e-06	1.107e-05	1.72919e-05	1.25962e-05	2.5387e-05	0.00010152	1.48107e-05
cg00373967	19	MAP3K10	MAP3K10	Body	Island	8.85036e-07	0.016828	0.401273	92.8259	1.32523	91.9014	1.71661	Higher	6.76887e-07	9.2466e-07	1.49019e-06	1.77275e-06	1.13313e-05	1.67117e-07	1.107e-05	1.72919e-05	1.72343e-05	2.5387e-05	0.00014651	5.17879e-06
cg04979216	1					9.33997e-07	0.016828	0.423471	94.967	0.958563	95.4718	0.692137	Lower	1.49757e-06	1.79818e-06	1.23832e-05	4.12877e-06	4.16819e-05	3.09838e-05	1.34756e-05	1.82518e-05	2.88568e-05	2.5387e-05	0.000221027	0.000102937
cg27275115	18	PG	NAPG	Body	Island	1.01627e-06	0.016828	0.460775	5.03694	0.588464	5.38909	0.629529	Lower	7.01438e-07	2.43196e-06	1.58669e-06	1.59686e-06	9.14596e-06	1.92682e-05	1.107e-05	1.90703e-05	1.72343e-05	2.5387e-05	0.000132323	7.78064e-05
cg10453758	3	UBA5;NPHP3-ACAD11;ACAD11	UBA5;UBA5;ACAD11	Body;5'UTR;TSS1500	S_Shore	1.03743e-06	0.016828	0.470369	57.7394	4.19978	55.7931	4.0686	Higher	1.18511e-06	1.27768e-06	5.68374e-07	1.16576e-06	0.000258253	7.69984e-07	1.26333e-05	1.72919e-05	1.25962e-05	2.5387e-05	0.000456447	9.36419e-06
cg25055744	17	TBCD;ZNF750	TBCD;ZNF750	Body;5'UTR		1.04838e-06	0.016828	0.475332	95.4556	0.783025	95.8499	0.792252	Lower	9.75069e-07	1.23377e-06	5.52915e-07	1.33269e-06	0.000267522	0.000295283	1.23175e-05	1.72919e-05	1.25962e-05	2.5387e-05	0.000466519	0.000459566
cg07075299	13	HTR2A	HTR2A;HTR2A	TSS1500;TSS1500		1.04879e-06	0.016828	0.47552	94.7579	1.36245	95.4984	1.24903	Lower	1.5915e-06	1.94789e-06	3.51088e-06	3.99203e-06	0.000132623	3.2311e-05	1.34756e-05	1.895e-05	2.00316e-05	2.5387e-05	0.000316506	0.000104078
cg15049177	12				N_Shore	1.05382e-06	0.016828	0.477798	79.8238	3.897	81.3858	3.66404	Lower	8.27023e-07	1.11631e-06	3.42922e-06	7.53944e-06	4.78132e-05	1.29407e-05	1.22456e-05	1.72919e-05	2.00316e-05	3.0867e-05	0.000222815	6.235e-05
cg10724491	3	RP11-572M11.4;C3orf17	C3orf17;C3orf17;C3orf17	Body;Body;Body	Island	1.07635e-06	0.016828	0.488013	4.5269	0.415692	4.22594	0.431462	Higher	1.44737e-06	9.58788e-07	1.91465e-06	5.21302e-07	1.1802e-06	1.28487e-06	1.34756e-05	1.72919e-05	1.84633e-05	2.27692e-05	8.5728e-05	1.34044e-05
cg27444994	16	CDH8	CDH8	TSS200	Island	1.18294e-06	0.0177618	0.536342	7.64239	1.01169	7.01703	1.04456	Higher	1.122e-06	1.35931e-06	7.98576e-06	4.1683e-06	1.31187e-05	2.53346e-06	1.26333e-05	1.72919e-05	2.3258e-05	2.5387e-05	0.00015228	2.11958e-05
cg03982487	6	ZNF311	ZNF311	Body		1.23234e-06	0.0177618	0.55874	92.9977	1.60461	91.844	1.88767	Higher	6.02635e-07	1.65962e-06	3.55912e-06	2.39774e-06	7.65226e-06	4.30899e-07	1.107e-05	1.82518e-05	2.00316e-05	2.5387e-05	0.000132323	6.5685e-06
cg02322140	16	USP7;RP11-77H9.8	USP7	TSS1500	Island	1.3782e-06	0.0177618	0.624874	4.15499	0.429792	3.88799	0.395227	Higher	1.58075e-06	1.99533e-06	8.65479e-07	6.42279e-07	6.90477e-06	6.45355e-06	1.34756e-05	1.895e-05	1.46611e-05	2.27692e-05	0.000132323	3.98631e-05
cg26582230	4	RGS12	RGS12;RGS12;RGS12	Body;TSS200;Body	N_Shelf	1.40369e-06	0.0177618	0.63643	25.1371	3.0308	23.8873	2.75293	Higher	1.20229e-06	1.46068e-06	1.47993e-06	1.77799e-06	0.00334233	0.00162259	1.26333e-05	1.72919e-05	1.72343e-05	2.5387e-05	0.00360874	0.00186771
cg13966575	8	RP11-89K10.1				1.42507e-06	0.0177618	0.646123	88.7598	2.30662	89.1893	2.66404	Lower	1.06483e-06	1.67204e-06	1.20909e-06	3.97773e-06	0.0023348	0.00530819	1.26333e-05	1.82518e-05	1.62918e-05	2.5387e-05	0.00258431	0.00553003
cg00331616	13	MPHOSPH8	MPHOSPH8	TSS1500	N_Shore	1.47436e-06	0.0177618	0.668469	85.2209	2.25669	83.5088	2.55693	Higher	6.82259e-07	1.28783e-06	9.56669e-07	2.69374e-06	5.11691e-07	4.2627e-07	1.107e-05	1.72919e-05	1.46611e-05	2.5387e-05	8.5728e-05	6.5685e-06
cg01821754	1	RP1-140A9.1;GNB1	GNB1;GNB1	5'UTR;1stExon	Island	1.50138e-06	0.0177618	0.680723	5.65428	0.717934	6.09604	0.779709	Lower	1.50562e-06	1.39998e-06	3.431e-06	2.24103e-06	5.8348e-05	6.63624e-05	1.34756e-05	1.72919e-05	2.00316e-05	2.5387e-05	0.000239496	0.000162551
cg21591624	11	SLC6A5	SLC6A5	Body	Island	1.51832e-06	0.0177618	0.6884	12.4441	2.04541	11.5666	1.68927	Higher	9.06457e-07	1.43768e-06	5.3238e-07	6.27168e-06	0.000584326	6.12852e-05	1.22456e-05	1.72919e-05	1.25962e-05	2.97264e-05	0.000810273	0.000155607
cg18509490	11	CTD-2516F10.2;SYT9	SYT9	Body		1.53565e-06	0.0177618	0.69626	81.3747	3.39519	79.8051	4.04239	Higher	1.27529e-06	1.45163e-06	3.54559e-06	1.35381e-06	4.8016e-05	3.42281e-08	1.31114e-05	1.72919e-05	2.00316e-05	2.5387e-05	0.000222815	1.84191e-06
cg10568689	11	PAAF1	PAAF1	Body	S_Shelf	1.57762e-06	0.0177618	0.715286	94.9078	1.24809	95.6172	1.1821	Lower	1.56125e-06	3.16783e-06	2.46693e-06	4.01092e-06	6.3285e-05	3.14091e-05	1.34756e-05	1.90703e-05	1.87077e-05	2.5387e-05	0.0002397	0.000102937
cg03694868	2				Island	1.62993e-06	0.0177618	0.739004	9.63167	1.01379	10.2153	1.05052	Lower	2.23528e-06	1.31351e-06	4.83026e-06	2.44942e-06	3.11188e-05	2.13708e-06	1.4894e-05	1.72919e-05	2.17224e-05	2.5387e-05	0.000198027	1.83359e-05
cg19630102	14	PIGH	PIGH	TSS200	Island	1.66996e-06	0.0177618	0.757154	8.09014	0.776851	8.53294	0.806141	Lower	1.60498e-06	1.7628e-06	5.48262e-06	6.50854e-06	2.9113e-05	3.12726e-05	1.34756e-05	1.82518e-05	2.20309e-05	2.97264e-05	0.000197076	0.000102937
cg26090075	5	FAT2	FAT2	TSS1500		1.7702e-06	0.0177618	0.802602	86.8003	2.73432	87.3001	3.03552	Lower	1.88458e-06	1.82844e-06	2.39261e-06	2.80822e-06	0.00491817	0.0109489	1.39938e-05	1.82518e-05	1.87077e-05	2.5387e-05	0.00511028	0.0110763
cg24683121	2				S_Shelf	1.8685e-06	0.0177618	0.847174	94.9121	1.19057	95.5598	0.995475	Lower	1.86192e-06	2.07615e-06	1.57873e-06	3.85955e-06	4.73964e-05	5.15954e-05	1.39938e-05	1.90703e-05	1.72343e-05	2.5387e-05	0.000222815	0.000140965
cg21711132	15	GABRG3	GABRG3	TSS1500	Island	1.87718e-06	0.0177618	0.851109	21.8275	3.50105	19.6411	3.5463	Higher	2.36361e-06	2.78358e-06	7.20821e-06	1.44498e-06	1.6987e-05	1.58889e-05	1.49705e-05	1.90703e-05	2.3258e-05	2.5387e-05	0.000155902	6.89e-05
cg08144675	16				Island	1.90147e-06	0.0177618	0.862119	8.20807	0.816632	7.6938	0.898659	Higher	1.91528e-06	3.14612e-06	2.59603e-06	3.1809e-06	9.14963e-06	1.43716e-06	1.39938e-05	1.90703e-05	1.87077e-05	2.5387e-05	0.000132323	1.42863e-05
cg15545957	19	CTC-273B12.5;CTC-273B12.7;CYTH2	CYTH2;CYTH2	TSS1500;TSS1500	N_Shore	1.92867e-06	0.0177618	0.874454	4.80289	0.57295	4.46855	0.613314	Higher	2.49767e-06	2.70025e-06	1.43682e-06	2.64853e-06	0.000124269	3.50952e-05	1.52823e-05	1.90703e-05	1.72343e-05	2.5387e-05	0.000308768	0.000109361
cg19716125	14					1.97559e-06	0.0177618	0.895728	85.5463	1.40355	84.6559	1.48367	Higher	2.28089e-06	3.41043e-06	9.47644e-07	1.68043e-06	1.9422e-05	2.0115e-05	1.48986e-05	1.91666e-05	1.46611e-05	2.5387e-05	0.000169637	7.85093e-05
cg18054281	10	RP11-298E9.6				1.97695e-06	0.0177618	0.896344	90.7721	1.80898	91.6935	1.57927	Lower	2.69933e-06	2.61511e-06	5.53431e-06	6.42825e-06	5.823e-05	0.000202302	1.55126e-05	1.90703e-05	2.20309e-05	2.97264e-05	0.000239496	0.000343036
cg17844725	1					2.04462e-06	0.0177618	0.927026	32.2297	3.59972	34.1925	3.92211	Lower	2.15556e-06	2.42489e-06	4.79429e-06	7.90202e-06	2.38431e-05	3.34585e-05	1.46186e-05	1.90703e-05	2.17224e-05	3.0867e-05	0.000182629	0.000106764
cg08660555	1	TEX35			N_Shelf	2.1194e-06	0.0177618	0.960927	95.8293	0.845119	96.2106	0.805905	Lower	2.6491e-06	2.84085e-06	6.96732e-06	1.59306e-06	0.00179426	0.0011469	1.55126e-05	1.90703e-05	2.3258e-05	2.5387e-05	0.00207728	0.00140763
cg11938738	6					2.12261e-06	0.0177618	0.962384	93.0117	1.37942	93.635	1.21566	Lower	1.17925e-06	2.82366e-06	6.66297e-06	2.72403e-06	0.000730983	0.00125773	1.26333e-05	1.90703e-05	2.32483e-05	2.5387e-05	0.000964407	0.00149849
cg01205324	19				Island	2.13409e-06	0.0177618	0.967589	6.26109	1.01286	6.84171	0.987797	Lower	1.6965e-06	3.16071e-06	4.49168e-06	3.60155e-06	1.8097e-05	2.53204e-05	1.39938e-05	1.90703e-05	2.17224e-05	2.5387e-05	0.000162038	8.91411e-05
cg18418460	6	ULBP3	ULBP3	Body	Island	2.14906e-06	0.0177618	0.974379	3.79835	0.358027	3.59436	0.316658	Higher	2.73114e-06	5.65448e-06	7.94572e-06	7.5845e-06	7.6326e-05	7.33937e-05	1.55126e-05	2.37928e-05	2.3258e-05	3.0867e-05	0.000256274	0.000175615
cg12516875	22	MIRLET7BHG;RP6-109B7.4			N_Shelf	2.16471e-06	0.0177618	0.981472	91.2032	1.66226	92.0641	1.70757	Lower	3.44748e-06	2.40301e-06	2.37767e-06	2.49153e-06	8.49467e-06	2.14443e-05	1.55126e-05	1.90703e-05	1.87077e-05	2.5387e-05	0.000132323	8.1432e-05
cg00502017	15	RP11-429B14.1;LINC00928	LOC283761;LOC283761;LOC283761;LOC283761	TSS1500;TSS1500;TSS1500;TSS1500		2.18048e-06	0.0177618	0.988622	83.671	2.36261	84.6526	2.37201	Lower	2.13123e-06	2.30719e-06	4.74432e-06	5.31867e-06	0.000225208	0.000149103	1.46186e-05	1.90703e-05	2.17224e-05	2.96357e-05	0.000414706	0.000266223
cg26142132	17	AAT	AANAT;AANAT	TSS200;Body		2.1938e-06	0.0177618	0.99466	76.2704	2.834	74.8785	3.12168	Higher	2.40755e-06	3.49701e-06	2.01134e-06	5.93664e-06	0.00010679	2.08278e-08	1.49736e-05	1.91666e-05	1.87077e-05	2.97264e-05	0.000300239	1.56832e-06
cg03190725	6	RP3-468B3.2				2.26752e-06	0.0178764	1	85.0092	2.97164	83.6093	3.36044	Higher	1.42232e-06	2.49339e-06	3.16856e-06	2.12929e-06	2.55256e-05	3.0817e-09	1.34756e-05	1.90703e-05	1.99445e-05	2.5387e-05	0.000184385	5.6927e-07
cg19673440	2					2.2868e-06	0.0178764	1	93.1672	1.29208	92.2745	1.53262	Higher	9.37304e-07	3.25681e-06	2.84502e-06	5.62582e-06	5.27903e-06	4.53004e-07	1.22456e-05	1.91249e-05	1.95355e-05	2.96357e-05	0.000132323	6.5685e-06
cg26180557	7	POU6F2;POU6F2-AS2	POU6F2;POU6F2	5'UTR;5'UTR		2.54004e-06	0.0193534	1	91.1701	1.94416	92.1058	1.68857	Lower	1.92165e-06	2.84696e-06	3.20555e-06	3.54252e-06	0.000576011	0.000544138	1.39938e-05	1.90703e-05	1.99445e-05	2.5387e-05	0.000805115	0.000754
cg18775634	3	RP11-222K16.2			N_Shore	2.56112e-06	0.0193534	1	9.47525	1.30749	10.3468	1.42158	Lower	3.05985e-06	3.50216e-06	2.10695e-06	3.38237e-06	1.62271e-05	5.3539e-06	1.55126e-05	1.91666e-05	1.87077e-05	2.5387e-05	0.00015228	3.36158e-05
cg11594420	19	TEX101	TEX101;TEX101	TSS200;Body	Island	2.69488e-06	0.0196686	1	95.7562	1.12588	94.9215	1.48237	Higher	2.05988e-06	3.01268e-06	5.19665e-07	9.59033e-07	1.13791e-06	5.6188e-07	1.44581e-05	1.90703e-05	1.25962e-05	2.41612e-05	8.5728e-05	7.84719e-06
cg19934381	17	B3GNTL1	B3GNTL1	Body		2.72333e-06	0.0196686	1	5.85284	0.833457	5.52673	0.679806	Higher	8.74059e-07	3.87462e-06	6.94692e-07	3.57142e-06	0.00228631	0.00067368	1.22456e-05	1.95564e-05	1.31007e-05	2.5387e-05	0.00254746	0.000894711
cg04829993	10	COL13A1	COL13A1;COL13A1;COL13A1;COL13A1;COL13A1;COL13A1;COL13A1;COL13A1;COL13A1;COL13A1;COL13A1;COL13A1;COL13A1;COL13A1;COL13A1;COL13A1;COL13A1;COL13A1;COL13A1;COL13A1	TSS200;TSS200;TSS200;TSS200;TSS200;TSS200;TSS200;TSS200;TSS200;TSS200;TSS200;TSS200;TSS200;TSS200;TSS200;TSS200;TSS200;TSS200;TSS200;TSS200	Island	2.73297e-06	0.0196686	1	9.92794	1.86225	9.03108	1.87748	Higher	3.42386e-06	2.69627e-06	1.82833e-05	1.11163e-05	1.50041e-05	1.37882e-05	1.55126e-05	1.90703e-05	3.43239e-05	3.72292e-05	0.00015228	6.50325e-05
cg20302165	2	KLF7	KLF7	TSS1500	Island	2.83163e-06	0.0200602	1	3.49198	0.407401	3.25426	0.359282	Higher	3.32432e-06	3.06479e-06	2.45274e-06	5.47976e-06	6.95383e-05	2.93314e-05	1.55126e-05	1.90703e-05	1.87077e-05	2.96357e-05	0.000242659	0.000100419
cg24627789	8				N_Shelf	3.03952e-06	0.0205842	1	92.2494	1.30103	91.3379	1.78024	Higher	4.30673e-06	2.99836e-06	8.78551e-06	2.69212e-06	4.54752e-05	2.69895e-06	1.57066e-05	1.90703e-05	2.41885e-05	2.5387e-05	0.000222182	2.21283e-05
cg12432552	1	TAF13	TAF13;TAF13	1stExon;5'UTR	Island	3.05013e-06	0.0205842	1	6.11402	0.765665	5.69386	0.630225	Higher	2.88944e-06	4.30922e-06	7.22256e-06	6.68297e-06	7.77323e-05	1.24086e-05	1.55126e-05	2.02133e-05	2.3258e-05	2.97849e-05	0.000256274	6.15105e-05
cg11838640	15	RP11-502I4.3;MAP2K5	MAP2K5;MAP2K5;MAP2K5;MAP2K5	5'UTR;5'UTR;1stExon;1stExon	Island	3.06584e-06	0.0205842	1	9.93702	1.06661	10.5393	1.22722	Lower	3.51572e-06	2.53136e-06	2.6169e-06	4.97231e-06	0.000414746	0.000198479	1.55126e-05	1.90703e-05	1.87077e-05	2.85398e-05	0.000636898	0.000337765
cg26325568	4	RPS3A	RPS3A	TSS200	Island	3.22712e-06	0.0205842	1	7.70832	0.644705	8.07351	0.736436	Lower	1.85127e-06	2.7182e-06	1.7917e-06	4.02148e-06	0.000227854	0.000240187	1.39938e-05	1.90703e-05	1.79571e-05	2.5387e-05	0.000418185	0.000393391
cg07910986	7	IGFBP3	IGFBP3;IGFBP3	TSS1500;TSS1500	Island	3.23894e-06	0.0205842	1	4.4821	0.553018	4.14338	0.516864	Higher	5.54579e-06	2.46473e-06	4.41458e-06	4.07535e-06	2.15703e-05	6.92539e-06	1.75092e-05	1.90703e-05	2.17224e-05	2.5387e-05	0.0001728	4.0194e-05
cg13053595	3	SRPRB	SRPRB	Body	S_Shore	3.24004e-06	0.0205842	1	86.4301	2.57061	87.6266	2.88224	Lower	2.57114e-06	5.24844e-06	9.73516e-06	2.34054e-05	0.00096758	0.00054395	1.54608e-05	2.26108e-05	2.51673e-05	4.73249e-05	0.00122962	0.000754
cg05002580	6	ARID1B	ARID1B;ARID1B;ARID1B	Body;Body;Body		3.25913e-06	0.0205842	1	96.0852	0.837933	96.3893	0.875929	Lower	3.04231e-06	3.28499e-06	2.7974e-06	7.73676e-06	0.000534069	0.000917357	1.55126e-05	1.91249e-05	1.95355e-05	3.0867e-05	0.000754827	0.001164
cg27394563	12	SART3	SART3	Body	Island	3.26879e-06	0.0205842	1	4.90505	0.571818	5.27317	0.607198	Lower	1.95669e-06	6.33639e-06	3.02117e-06	9.78197e-06	4.47544e-05	3.80717e-05	1.40158e-05	2.38175e-05	1.963e-05	3.49681e-05	0.000222182	0.0001131
cg16396542	1	GBP3	GBP3	3'UTR		3.37243e-06	0.0206416	1	91.6576	1.89996	90.4605	2.23839	Higher	3.42759e-06	4.77731e-06	1.48119e-05	9.42925e-06	4.29292e-05	8.83224e-06	1.55126e-05	2.14024e-05	3.06571e-05	3.46987e-05	0.000221027	4.72821e-05
cg10539861	10	ENTPD7	ENTPD7	TSS1500	N_Shore	3.42666e-06	0.0206416	1	10.2528	1.79454	9.2273	1.6501	Higher	3.46524e-06	5.71676e-06	1.73591e-05	1.61212e-05	4.35164e-05	7.53708e-06	1.55126e-05	2.38175e-05	3.31303e-05	4.35447e-05	0.000221027	4.24266e-05
cg07929768	2					3.48575e-06	0.0206416	1	43.0512	5.8151	46.3598	6.34535	Lower	2.37117e-06	4.51168e-06	1.00898e-06	7.60807e-06	9.75889e-05	2.60077e-05	1.49705e-05	2.0845e-05	1.46611e-05	3.0867e-05	0.000291251	9.07593e-05
cg08740524	12	RP11-834C11.4;RP11-834C11.5	LOC400043	Body	Island	3.51504e-06	0.0206416	1	4.09444	0.49567	3.78386	0.530539	Higher	4.00086e-06	4.3242e-06	3.80863e-06	3.34251e-06	2.06563e-05	3.90201e-06	1.56241e-05	2.02133e-05	2.09262e-05	2.5387e-05	0.000170017	2.77415e-05
cg03325664	8	GATA4			N_Shelf	3.51869e-06	0.0206416	1	25.8456	3.74825	27.8266	4.00139	Lower	6.87652e-07	4.13824e-06	1.60433e-06	5.20925e-06	6.17184e-05	6.51562e-05	1.107e-05	2.01162e-05	1.72343e-05	2.94715e-05	0.0002397	0.000160656
cg01783101	7					3.55107e-06	0.0206416	1	90.3255	3.22152	87.8408	4.4165	Higher	4.2119e-06	3.11447e-06	2.62569e-06	4.12727e-06	3.41699e-05	1.93707e-05	1.57066e-05	1.90703e-05	1.87077e-05	2.5387e-05	0.000204114	7.78064e-05
cg24956710	11	TRIM29	TRIM29	Body		3.82513e-06	0.0217596	1	92.7357	1.49767	93.2791	1.35526	Lower	2.74678e-06	7.05108e-06	1.69595e-05	4.4437e-05	0.00063622	0.00128125	1.55126e-05	2.39921e-05	3.2699e-05	6.16396e-05	0.000862906	0.00151748
cg24228532	18				S_Shelf	3.86321e-06	0.0217596	1	46.3762	5.66046	42.6954	5.6133	Higher	5.17075e-06	5.05937e-06	3.00713e-06	7.80542e-07	1.41042e-05	4.7349e-06	1.72212e-05	2.22993e-05	1.963e-05	2.27692e-05	0.00015228	3.02239e-05
cg14707431	9	TSTD2;NCBP1	TSTD2;NCBP1	5'UTR;TSS1500	Island	3.88738e-06	0.0217596	1	7.37332	0.715314	6.96219	0.690165	Higher	3.66922e-06	3.674e-06	1.29876e-05	1.66142e-05	0.000131492	5.63066e-05	1.55811e-05	1.95134e-05	2.91018e-05	4.38299e-05	0.000313732	0.000150533
cg13158641	7					4.12589e-06	0.0227829	1	62.3044	1.24024	61.5515	1.36277	Higher	3.03922e-06	4.58331e-06	1.02263e-06	6.14054e-06	0.00012899	1.61112e-05	1.55126e-05	2.09135e-05	1.46611e-05	2.97264e-05	0.000312929	6.89739e-05
cg15157974	1	DISC1	DISC1;DISC1;TSNAX-DISC1;DISC1;DISC1;DISC1;DISC1;DISC1	Body;Body;Body;Body;Body;3'UTR;Body;3'UTR		4.21307e-06	0.0227829	1	93.108	1.84297	92.2892	2.14486	Higher	3.52091e-06	6.04642e-06	2.92338e-06	3.48304e-06	5.86376e-05	3.45478e-07	1.55126e-05	2.38175e-05	1.963e-05	2.5387e-05	0.000239496	6.19357e-06
cg20104018	19	SMG9	C19orf61	3'UTR		4.28885e-06	0.0227829	1	85.0872	2.54057	83.5988	2.76474	Higher	3.89772e-06	3.44317e-06	5.20708e-06	1.68584e-05	0.000249936	8.88202e-05	1.56241e-05	1.91666e-05	2.20309e-05	4.38299e-05	0.000447619	0.0001924
cg13002044	7	TMEM178B				4.30608e-06	0.0227829	1	86.9578	2.61487	85.4875	3.21254	Higher	4.39382e-06	3.75989e-06	5.48029e-06	4.65383e-06	1.05177e-05	2.73874e-08	1.58458e-05	1.95134e-05	2.20309e-05	2.75367e-05	0.000141	1.72163e-06
cg03599147	11	TENM4	ODZ4	Body		4.39938e-06	0.0227829	1	70.1464	3.02292	68.3387	3.53232	Higher	3.22102e-06	5.80363e-06	6.56812e-06	1.04025e-05	0.000202713	5.3758e-05	1.55126e-05	2.38175e-05	2.32483e-05	3.58327e-05	0.000387452	0.000144876
cg22063259	15	ISLR2	ISLR2;ISLR2;ISLR2;ISLR2	3'UTR;3'UTR;3'UTR;3'UTR	Island	4.46367e-06	0.0227829	1	5.38198	0.534108	5.1536	0.535983	Higher	3.10704e-06	5.47296e-06	2.39277e-07	3.0792e-06	0.00111308	0.000132694	1.55126e-05	2.32936e-05	1.12629e-05	2.5387e-05	0.00136839	0.000250705
cg10751382	19	TBC1D17	TBC1D17;TBC1D17	Body;Body	Island	4.50038e-06	0.0227829	1	83.2454	6.37433	78.6098	7.35584	Higher	3.18606e-06	7.01529e-06	3.82877e-06	1.33522e-05	1.43253e-05	1.29306e-05	1.55126e-05	2.39921e-05	2.09262e-05	4.02323e-05	0.00015228	6.235e-05
cg20645878	13	MCF2L	MCF2L;MCF2L	Body;Body	N_Shore	4.5018e-06	0.0227829	1	89.7809	1.67244	90.6878	1.98651	Lower	4.86096e-06	3.92634e-06	6.90523e-06	6.60287e-06	1.62086e-05	2.35928e-05	1.67166e-05	1.95983e-05	2.3258e-05	2.97786e-05	0.00015228	8.47352e-05
cg17126941	7	TMEM60;PHTF2	PHTF2;PHTF2;TMEM60	TSS1500;TSS1500;TSS200	Island	4.52244e-06	0.0227829	1	8.59261	1.27371	7.92589	1.04299	Higher	5.26245e-06	6.35305e-06	6.38008e-06	6.23679e-06	2.80659e-05	0.000141186	1.73351e-05	2.38175e-05	2.32483e-05	2.97264e-05	0.000197076	0.000259302
cg15133201	1				N_Shelf	4.58308e-06	0.0228346	1	94.6033	1.07677	95.041	1.17681	Lower	3.91287e-06	3.54192e-06	2.37421e-06	2.36838e-06	0.00118637	0.00153531	1.56241e-05	1.91666e-05	1.87077e-05	2.5387e-05	0.00145746	0.0017864
cg11816345	17	MAP3K3	MAP3K3;MAP3K3	Body;Body	S_Shore	4.72925e-06	0.0233068	1	19.8533	2.3653	21.4608	2.81625	Lower	8.16783e-06	3.81071e-06	5.40245e-06	5.44266e-06	1.23984e-05	4.47731e-06	1.91138e-05	1.95134e-05	2.20309e-05	2.96357e-05	0.00015228	3.016e-05
cg19955105	2	CLIP4	CLIP4	5'UTR		4.83318e-06	0.0233911	1	93.2826	1.55388	92.3509	1.89717	Higher	3.93529e-06	6.8224e-06	5.84516e-06	1.92385e-05	0.000100421	1.54395e-05	1.56241e-05	2.39921e-05	2.27366e-05	4.5119e-05	0.000295015	6.89e-05
cg15150979	10					4.88936e-06	0.0233911	1	94.1177	0.812117	94.5042	0.833187	Lower	4.03861e-06	7.09388e-06	1.5185e-05	1.86368e-05	0.000345949	0.000467502	1.56241e-05	2.39921e-05	3.08086e-05	4.5119e-05	0.00057311	0.000668642
cg06352370	1	RP11-460I13.2;XKR8	XKR8	TSS200	Island	4.90111e-06	0.0233911	1	5.71764	0.708144	5.28115	0.611012	Higher	6.61917e-06	3.81141e-06	4.8425e-06	7.5011e-06	7.09161e-06	3.88905e-06	1.85599e-05	1.95134e-05	2.17224e-05	3.0867e-05	0.000132323	2.77415e-05
cg24632480	10					4.98507e-06	0.0235439	1	88.8904	2.26588	89.9669	2.34473	Lower	5.7483e-06	5.94979e-06	1.88767e-05	7.07937e-06	6.46026e-05	7.80718e-05	1.75856e-05	2.38175e-05	3.45141e-05	3.0867e-05	0.0002397	0.00018288
cg09257796	15	GABRG3	GABRG3	TSS1500	Island	5.06158e-06	0.0236588	1	16.7548	2.93877	15.1128	3.0005	Higher	4.90032e-06	6.17977e-06	9.37087e-06	4.75103e-06	0.000118685	0.000221686	1.67166e-05	2.38175e-05	2.47027e-05	2.76962e-05	0.000306466	0.000370327
cg18476478	19	ATF5;CTC-326K19.6	ATF5	3'UTR	S_Shelf	5.11723e-06	0.0236749	1	83.2168	3.15401	84.6141	2.68127	Lower	4.54879e-06	4.0952e-06	5.60903e-06	1.35756e-05	0.00030251	1.38206e-05	1.59671e-05	2.01162e-05	2.20309e-05	4.02323e-05	0.000515511	6.50325e-05
cg03181117	17	SCARF1	SCARF1;SCARF1;SCARF1;SCARF1;SCARF1	Body;Body;Body;Body;Body	N_Shelf	5.32455e-06	0.0240519	1	91.8847	1.02626	92.289	0.92768	Lower	3.36117e-06	9.78559e-06	1.31869e-05	2.09326e-05	0.00208415	0.00227588	1.55126e-05	2.69969e-05	2.91018e-05	4.52634e-05	0.00234859	0.00255821
cg09310612	16	WDR90;LA16c-349E10.1;MSLN	WDR90	Body	S_Shelf	5.33476e-06	0.0240519	1	94.1355	0.937835	94.5033	1.16836	Lower	3.76679e-06	4.24951e-06	8.29827e-06	9.3924e-06	0.00516651	0.00116011	1.56241e-05	2.02133e-05	2.38767e-05	3.46987e-05	0.00534044	0.00141528
cg11250576	5	HSPA4	HSPA4	TSS1500	N_Shore	5.40746e-06	0.0240519	1	44.8955	4.05436	42.9387	4.04554	Higher	2.97185e-06	4.80382e-06	2.58866e-06	9.32392e-06	6.58708e-05	0.000218892	1.55126e-05	2.14024e-05	1.87077e-05	3.46987e-05	0.0002397	0.000366947
cg13620744	19				Island	5.59897e-06	0.0240519	1	6.43625	0.804348	5.98008	0.746983	Higher	8.59497e-06	6.48537e-06	5.38856e-05	2.06462e-05	0.000229568	6.03037e-05	1.9731e-05	2.38697e-05	6.2524e-05	4.52634e-05	0.000419806	0.000155607
cg27571769	4	ACSL1	ACSL1	Body		5.66841e-06	0.0240519	1	5.92214	1.33357	5.32746	1.1945	Higher	5.17546e-06	8.6202e-06	6.91184e-06	1.37209e-05	8.8316e-06	2.00175e-05	1.72212e-05	2.64087e-05	2.3258e-05	4.02323e-05	0.000132323	7.85093e-05
cg10835770	10	ENTPD7	ENTPD7	TSS1500	N_Shore	5.69173e-06	0.0240519	1	13.7828	2.56348	12.6727	2.19817	Higher	3.61321e-06	9.80191e-06	4.03139e-06	2.0741e-05	0.000355169	7.62724e-05	1.55476e-05	2.69969e-05	2.17044e-05	4.52634e-05	0.000577835	0.000179782
cg20881054	14	RP11-99E15.2;VASH1	VASH1;VASH1	1stExon;5'UTR	Island	5.71743e-06	0.0240519	1	4.51401	0.533569	4.83456	0.640876	Lower	4.29444e-06	6.12514e-06	3.29036e-05	5.40698e-05	7.64832e-05	9.21762e-05	1.57066e-05	2.38175e-05	4.41399e-05	6.67879e-05	0.000256274	0.000195278
cg16370537	7	PTPRN2	PTPRN2;PTPRN2;PTPRN2	Body;Body;Body	S_Shore	5.76247e-06	0.0240519	1	95.4732	1.01181	94.8639	1.36914	Higher	3.69578e-06	1.03768e-05	1.64269e-05	2.35958e-05	5.39281e-05	1.64358e-06	1.55811e-05	2.71834e-05	3.25411e-05	4.73249e-05	0.000239496	1.48107e-05
cg22998777	14	RSE2	RNASE2	TSS1500		5.77647e-06	0.0240519	1	72.643	3.14619	71.2437	2.47562	Higher	7.09344e-06	1.12312e-05	ns	2.04741e-05	ns	ns	1.89235e-05	2.81113e-05	NA	4.52634e-05	NA	NA
cg00772840	19	AC005785.2;AKAP8	AKAP8	TSS200	Island	5.78023e-06	0.0240519	1	4.46957	0.436699	4.71345	0.466318	Lower	6.20675e-06	8.26089e-06	7.4829e-06	4.30918e-05	6.84863e-05	0.00010394	1.78302e-05	2.64087e-05	2.3258e-05	6.11794e-05	0.000242659	0.000213087
cg11941507	3	SRPRB	SRPRB	TSS200	N_Shore	5.86571e-06	0.0240519	1	26.4482	3.70642	24.4297	3.18964	Higher	5.91148e-06	6.6872e-06	6.04795e-06	1.99756e-05	3.03897e-05	4.29781e-05	1.76369e-05	2.39921e-05	2.32483e-05	4.5119e-05	0.000197076	0.0001247
cg15729062	6	PPP1R10	PPP1R10	5'UTR		5.94186e-06	0.0240519	1	81.2078	3.78105	82.8539	3.18582	Lower	5.79926e-06	6.03674e-06	3.27635e-06	1.58319e-05	0.00107401	0.00118858	1.75856e-05	2.38175e-05	1.99445e-05	4.33532e-05	0.00132779	0.00144254
cg04678315	12					5.98933e-06	0.0240519	1	14.5406	2.8558	13.4161	2.50533	Higher	6.65576e-06	1.33193e-05	4.97576e-06	9.19237e-06	3.41219e-05	2.19455e-07	1.85599e-05	3.01477e-05	2.20309e-05	3.46987e-05	0.000204114	5.17879e-06
cg06799721	5	TARS	TARS	Body		5.99395e-06	0.0240519	1	91.5863	2.31812	90.5321	2.90637	Higher	4.93613e-06	9.29815e-06	5.15303e-06	7.56777e-06	3.8419e-05	2.38998e-07	1.67166e-05	2.69061e-05	2.20309e-05	3.0867e-05	0.000218764	5.17879e-06
cg22288147	X	IQSEC2	IQSEC2;IQSEC2	Body;Body	Island	5.9999e-06	0.0240519	1	94.2044	0.956244	94.5854	0.859659	Lower	7.72673e-06	9.25877e-06	2.92366e-05	1.67739e-05	0.000839503	0.000602623	1.895e-05	2.69061e-05	4.13439e-05	4.38299e-05	0.00108536	0.000805954
cg02932355	8					6.09178e-06	0.0240519	1	88.3003	1.60055	89.146	1.65513	Lower	6.06573e-06	6.40718e-06	1.18325e-05	1.40977e-05	3.24242e-05	5.91363e-05	1.77638e-05	2.38175e-05	2.80994e-05	4.07712e-05	0.000199711	0.000154727
cg26620314	16					6.10054e-06	0.0240519	1	91.8454	1.68671	92.3585	2.00626	Lower	9.27068e-06	6.38482e-06	4.37525e-05	2.32391e-05	0.000187916	0.000875785	2.00762e-05	2.38175e-05	5.3787e-05	4.73249e-05	0.000374011	0.0011195
cg06150430	17	ST6GALC2;RP11-666A8.9	ST6GALNAC2	Body		6.36492e-06	0.0241708	1	71.5097	5.16514	68.5405	5.28858	Higher	9.25943e-06	5.17806e-06	7.13243e-06	6.37317e-06	0.000112965	3.76692e-05	2.00762e-05	2.25657e-05	2.3258e-05	2.97264e-05	0.000301333	0.000112801
cg00865774	12	HMGA2;RPSAP52	RPSAP52;HMGA2;HMGA2	Body;Body;Body	Island	6.38022e-06	0.0241708	1	30.8258	3.47325	28.8871	3.18769	Higher	4.02954e-06	6.55245e-06	3.32371e-05	2.1177e-05	7.77391e-05	4.24063e-05	1.56241e-05	2.38697e-05	4.43844e-05	4.53944e-05	0.000256274	0.000123913
cg17066403	6	TNXB	TNXB	Body	Island	6.38488e-06	0.0241708	1	53.3411	3.34805	55.025	3.48837	Lower	6.3674e-06	8.20116e-06	7.90046e-06	1.02874e-05	0.000424503	8.39311e-05	1.80166e-05	2.64087e-05	2.3258e-05	3.58138e-05	0.000641767	0.000187398
cg06524846	7	CALD1				6.45325e-06	0.0241708	1	81.8839	2.44933	82.9334	2.71969	Lower	2.85353e-06	7.07488e-06	1.3193e-05	1.16976e-05	0.000384469	0.000548768	1.55126e-05	2.39921e-05	2.91018e-05	3.82267e-05	0.000611797	0.000758143
cg17139283	1				S_Shelf	6.49091e-06	0.0241708	1	95.3302	0.984492	94.6132	1.21026	Higher	7.20773e-06	9.46469e-06	2.19436e-05	1.51197e-05	1.97683e-06	3.19488e-06	1.895e-05	2.69574e-05	3.63714e-05	4.23919e-05	8.5728e-05	2.46204e-05
cg01402735	1	ELTD1	ELTD1	TSS200	S_Shore	6.53885e-06	0.0241708	1	34.8535	3.65126	32.5876	3.87877	Higher	5.58813e-06	9.72754e-06	1.47077e-05	5.56201e-06	4.53419e-05	9.02865e-06	1.75092e-05	2.69969e-05	3.06571e-05	2.96357e-05	0.000222182	4.72821e-05
cg12927270	3	LINC00879;WDR82P1	LOC255025	TSS200	Island	6.6174e-06	0.0241708	1	95.4695	0.659762	95.7237	0.611979	Lower	4.52007e-06	1.36079e-05	9.10433e-06	1.72273e-05	0.00562012	0.00287333	1.59671e-05	3.01477e-05	2.4505e-05	4.40459e-05	0.00577355	0.00312714
cg11700824	10	AGAP11;ADIRF;ADIRF-AS1;RP11-96C23.15	AGAP11	5'UTR	Island	6.62306e-06	0.0241708	1	4.46968	0.525306	4.16713	0.46927	Higher	7.08435e-06	7.07606e-06	1.35201e-05	9.97127e-06	8.07741e-05	3.36872e-05	1.89235e-05	2.39921e-05	2.94191e-05	3.53143e-05	0.000259986	0.000106764
cg18145961	6	PPIL4	PPIL4	Body	N_Shore	6.65336e-06	0.0241708	1	15.0516	2.48226	13.8325	1.94805	Higher	3.58376e-06	9.82573e-06	6.44017e-06	1.61943e-05	0.00120178	8.46593e-05	1.55476e-05	2.69969e-05	2.32483e-05	4.35447e-05	0.00146494	0.000187398
cg18758482	1	ZBTB8OS;RBBP4	RBBP4;RBBP4;RBBP4;ZBTB8OS	TSS1500;TSS1500;TSS1500;1stExon	N_Shore	6.66839e-06	0.0241708	1	43.8072	1.92623	44.8237	1.95694	Lower	4.24437e-06	8.12965e-06	4.77408e-06	1.38408e-05	6.5119e-05	3.09069e-06	1.57066e-05	2.64087e-05	2.17224e-05	4.02323e-05	0.0002397	2.46204e-05
cg09167413	5	GPR98	GPR98;GPR98	Body;Body		6.71788e-06	0.0241708	1	84.6672	3.01754	82.5321	3.94765	Higher	5.77601e-06	7.75363e-06	2.77404e-05	1.92033e-05	8.47629e-06	1.64945e-06	1.75856e-05	2.59934e-05	4.04764e-05	4.5119e-05	0.000132323	1.48107e-05
cg09754671	6	SNX9	SNX9	Body		6.77041e-06	0.0241708	1	96.5142	0.733651	96.8414	0.751794	Lower	6.77699e-06	1.0273e-05	2.91649e-05	6.12335e-05	0.00181632	0.00102833	1.86204e-05	2.7109e-05	4.13439e-05	7.22579e-05	0.0021056	0.00127734
cg20982052	12					6.97149e-06	0.0243147	1	93.4247	1.35471	92.6515	1.76991	Higher	5.34462e-06	8.58093e-06	7.35562e-06	3.19051e-05	3.16105e-05	3.26854e-07	1.74404e-05	2.64087e-05	2.3258e-05	5.44599e-05	0.000198027	6.16395e-06
cg22815766	11	NCAPD3	NCAPD3	3'UTR		6.9758e-06	0.0243147	1	91.0075	1.29241	91.5742	1.2962	Lower	4.27329e-06	1.11554e-05	8.65136e-06	1.58689e-05	0.000490371	0.000469927	1.57066e-05	2.81113e-05	2.41885e-05	4.33532e-05	0.000716122	0.000668642
cg26351001	4				Island	6.98699e-06	0.0243147	1	7.19959	0.696959	7.63391	0.75759	Lower	7.89342e-06	8.63376e-06	6.12881e-06	1.95505e-05	9.69397e-05	4.97224e-05	1.895e-05	2.64087e-05	2.32483e-05	4.5119e-05	0.000291251	0.000136766
cg14887335	4	FGF2;RP11-170N16.2	FGF2	Body		7.02526e-06	0.0243147	1	96.3242	0.90858	96.6432	0.899699	Lower	6.27418e-06	1.0672e-05	1.48739e-05	4.97581e-05	0.00314272	0.00376464	1.78671e-05	2.7776e-05	3.06956e-05	6.48598e-05	0.00342214	0.00401564
cg23692472	8	FZD6	FZD6;FZD6;FZD6	Body;Body;Body		7.08635e-06	0.0243404	1	87.7464	2.35494	86.3761	2.13145	Higher	7.29057e-06	5.94845e-06	1.40119e-05	1.37459e-05	8.48852e-06	6.43627e-07	1.895e-05	2.38175e-05	2.96517e-05	4.02323e-05	0.000132323	8.15577e-06
cg25972591	19	ZSCAN18	ZSCAN18;ZSCAN18	Body;Body	N_Shore	7.32616e-06	0.0248012	1	94.6244	1.11393	95.0565	1.20374	Lower	5.42674e-06	8.79656e-06	1.94014e-05	1.02737e-05	0.000788523	0.00190762	1.74404e-05	2.64698e-05	3.45141e-05	3.58138e-05	0.00103008	0.0021559
cg27597790	10	MCM10	MCM10;MCM10	TSS200;TSS200	Island	7.32992e-06	0.0248012	1	4.71528	0.566926	4.3968	0.597343	Higher	3.16424e-06	1.10658e-05	1.18747e-05	1.69523e-05	0.000142884	8.66948e-05	1.55126e-05	2.81113e-05	2.80994e-05	4.38299e-05	0.000329865	0.000190034
cg19554902	11	MUC2	MUC2	Body	Island	7.42869e-06	0.0248422	1	88.1338	1.79294	88.8448	1.62919	Lower	1.01699e-05	1.22645e-05	1.97984e-05	2.67031e-05	0.000513717	0.000766994	2.11011e-05	2.96924e-05	3.47191e-05	5.05965e-05	0.000729298	0.00100055
cg10315347	3	CGGBP1;RP11-159G9.5	CGGBP1;CGGBP1	TSS200;TSS200	Island	7.47857e-06	0.0248422	1	7.09559	0.847359	7.55893	0.995521	Lower	7.5192e-06	1.03214e-05	5.1595e-06	3.66756e-05	0.000162277	0.000117273	1.895e-05	2.7109e-05	2.20309e-05	5.72399e-05	0.000346091	0.000230937
cg14543998	20	SLC4A11;RP4-794I6.4			Island	7.58482e-06	0.0248422	1	5.02422	0.487729	5.30821	0.591747	Lower	6.73179e-06	1.24468e-05	1.69844e-05	9.09321e-06	0.000174428	0.000331573	1.8618e-05	2.97443e-05	3.2699e-05	3.46987e-05	0.000359473	0.000504694
cg13808936	9					7.63579e-06	0.0248422	1	82.6063	6.57597	83.1957	7.10069	Lower	8.14721e-06	6.81521e-06	8.60422e-06	4.36224e-05	0.0300679	0.0471398	1.91138e-05	2.39921e-05	2.41885e-05	6.1429e-05	0.0301	0.0471
cg03630771	19	AC010646.3			S_Shore	7.65616e-06	0.0248422	1	94.4144	1.23673	93.5672	1.38261	Higher	3.89888e-06	8.70511e-06	2.54813e-06	6.35407e-06	1.58904e-05	1.63094e-06	1.56241e-05	2.64087e-05	1.87077e-05	2.97264e-05	0.00015228	1.48107e-05
cg11353368	19				Island	7.67078e-06	0.0248422	1	3.14572	0.339819	2.97006	0.280001	Higher	6.13869e-06	1.02297e-05	2.04975e-05	5.94454e-05	0.000102964	8.3243e-05	1.77638e-05	2.7109e-05	3.529e-05	7.05724e-05	0.000295634	0.000187398
cg10365469	6	KIF25	KIF25;KIF25	TSS1500;TSS1500		7.9302e-06	0.0255002	1	95.1428	0.884526	95.4105	0.890537	Lower	4.77302e-06	8.14826e-06	7.81711e-06	7.13819e-06	0.00226428	0.00407697	1.65856e-05	2.64087e-05	2.3258e-05	3.0867e-05	0.00252905	0.00433285
cg19093939	2	KLHL29	KLHL29	5'UTR		8.12153e-06	0.0258949	1	93.9734	1.30891	94.3886	1.53563	Lower	8.7196e-06	8.20472e-06	1.70342e-05	6.49038e-06	0.00065485	0.000978304	1.99089e-05	2.64087e-05	3.2699e-05	2.97264e-05	0.000879117	0.00122088
cg00713411	8	DPYSL2;PNMA2	PNMA2	TSS1500	Island	8.20024e-06	0.0258949	1	7.64309	0.968737	8.16867	0.972668	Lower	9.03299e-06	9.3021e-06	2.63301e-05	7.86215e-06	0.000118842	0.000129298	2.00673e-05	2.69061e-05	3.94952e-05	3.0867e-05	0.000306466	0.000246868
cg18088415	6	LSM2	LSM2	Body	N_Shelf	8.24428e-06	0.0258949	1	85.8608	2.14956	84.451	2.68688	Higher	9.11552e-06	1.19128e-05	4.79072e-06	4.22491e-06	8.04969e-05	1.55759e-05	2.00673e-05	2.90974e-05	2.17224e-05	2.5387e-05	0.000259986	6.89e-05
cg14438019	17	HOXB7;HOXB9	HOXB9	Body	Island	8.34415e-06	0.0258949	1	3.92405	0.604316	4.23576	0.614241	Lower	1.76164e-06	9.55392e-06	7.84681e-06	4.20865e-05	0.000560941	0.000343999	1.39938e-05	2.69969e-05	2.3258e-05	6.0439e-05	0.000787075	0.000514091
cg01950844	6	SENP6	SENP6;SENP6	TSS1500;TSS1500	Island	8.41593e-06	0.0258949	1	8.25473	0.960843	9.02746	2.00155	Lower	7.11778e-06	8.69034e-06	5.56181e-06	6.19713e-06	7.27591e-05	0.000112795	1.89235e-05	2.64087e-05	2.20309e-05	2.97264e-05	0.000251127	0.000225402
cg23867081	6				S_Shore	8.41888e-06	0.0258949	1	8.63361	1.21018	9.27946	1.2005	Lower	6.02458e-06	8.34467e-06	5.59342e-07	1.78415e-05	3.6892e-05	4.69425e-05	1.77638e-05	2.64087e-05	1.25962e-05	4.45019e-05	0.000213452	0.00013181
cg05264148	17	TTYH2;MGC16275	TTYH2;MGC16275	TSS1500;Body	Island	8.45272e-06	0.0258949	1	4.99726	0.709026	5.33438	0.941933	Lower	7.83495e-06	1.00636e-05	1.67111e-05	4.70335e-05	0.00120577	0.00273774	1.895e-05	2.7109e-05	3.2699e-05	6.31222e-05	0.00147236	0.00299414
cg06902669	8	NBN;DECR1	DECR1	Body	Island	8.61958e-06	0.0260638	1	5.54185	0.705888	5.16406	0.615674	Higher	4.14123e-06	1.2917e-05	1.05578e-05	1.95243e-05	0.000130532	4.66992e-05	1.57066e-05	3.01477e-05	2.62908e-05	4.5119e-05	0.000313732	0.00013181
cg14412322	3	MAGI1	MAGI1;MAGI1;MAGI1	Body;Body;Body	Island	8.67674e-06	0.0260638	1	10.4537	1.75201	9.61875	1.66502	Higher	1.33986e-05	1.28219e-05	7.65567e-05	2.97815e-05	0.000353303	1.89567e-05	2.34037e-05	3.01477e-05	8.28536e-05	5.2288e-05	0.000577078	7.78064e-05
cg06480224	2	KIAA2012				8.68632e-06	0.0260638	1	87.8928	1.33614	87.0414	1.74984	Higher	8.53461e-06	1.3697e-05	3.0152e-05	3.96066e-05	2.44682e-05	2.2402e-07	1.9731e-05	3.01477e-05	4.21681e-05	5.93217e-05	0.00018424	5.17879e-06
cg27375330	3					8.73781e-06	0.0260638	1	93.326	1.1304	93.8907	1.1042	Lower	8.87765e-06	1.34911e-05	1.31317e-05	1.80232e-05	0.000189383	0.000260169	1.99592e-05	3.01477e-05	2.91018e-05	4.45019e-05	0.000374021	0.000413586
cg27078562	4	ADAM29	ADAM29;ADAM29;ADAM29;ADAM29	TSS1500;TSS1500;TSS1500;TSS1500		9.4131e-06	0.0277947	1	85.8604	2.23323	84.2836	3.08476	Higher	4.46087e-06	1.15924e-05	8.72581e-06	1.46705e-05	5.02497e-05	8.94721e-06	1.59466e-05	2.87346e-05	2.41885e-05	4.15769e-05	0.000227412	4.72821e-05
cg10813544	8				N_Shore	9.50436e-06	0.0277947	1	6.94011	0.795565	7.34506	0.726922	Lower	3.18717e-06	1.17997e-05	7.33616e-06	1.92436e-05	0.000135007	0.000192947	1.55126e-05	2.90403e-05	2.3258e-05	4.5119e-05	0.00031725	0.000330732
cg03771580	11	OR5A2	OR5A2	1stExon		9.50796e-06	0.0277947	1	86.3104	2.06358	85.2524	2.75939	Higher	7.90428e-06	9.13593e-06	2.33598e-05	3.62796e-05	8.5288e-05	2.24762e-05	1.895e-05	2.69061e-05	3.75416e-05	5.72399e-05	0.000269519	8.15625e-05
cg21620524	5	SLC9A3	SLC9A3	Body	Island	9.62239e-06	0.0277947	1	87.3353	1.41538	87.8291	1.46374	Lower	1.10648e-05	1.6095e-05	1.10317e-05	1.58571e-05	0.00129576	0.00093419	2.21416e-05	3.14531e-05	2.71046e-05	4.33532e-05	0.0015717	0.00117373
cg13967810	9	SMARCA2	SMARCA2;SMARCA2	Body;Body		9.6246e-06	0.0277947	1	91.0473	2.08419	92.0014	1.85806	Lower	7.75113e-06	9.29564e-06	6.59158e-06	2.87885e-05	0.000663626	0.000717038	1.895e-05	2.69061e-05	2.32483e-05	5.17789e-05	0.000882205	0.000938573
cg11651209	12				N_Shore	9.7225e-06	0.0278997	1	46.3688	4.99351	49.0401	5.2752	Lower	7.74362e-06	9.45731e-06	1.31703e-05	9.72919e-06	0.000121003	0.000109394	1.895e-05	2.69574e-05	2.91018e-05	3.49681e-05	0.000307405	0.00022093
cg24732339	19	ZNF350-AS1;ZNF350	ZNF350	Body		1.01553e-05	0.028837	1	97.0791	0.644059	96.625	0.691159	Higher	9.05886e-06	1.29978e-05	6.51443e-06	3.52911e-05	5.10009e-06	1.13351e-06	2.00673e-05	3.01477e-05	2.32483e-05	5.66894e-05	0.000132323	1.25297e-05
cg25353064	10	RP11-310E22.4				1.01763e-05	0.028837	1	90.4862	1.21931	89.6742	1.42351	Higher	1.66377e-05	1.45122e-05	1.18841e-05	1.95789e-05	1.6199e-05	4.17969e-06	2.64843e-05	3.05713e-05	2.80994e-05	4.5119e-05	0.00015228	2.91826e-05
cg03872267	15	MRPS11;RP11-97O12.7;MRPL46	MRPL46;MRPS11;MRPS11	TSS1500;Body;Body	Island	1.02797e-05	0.028949	1	5.7685	0.868996	6.21531	0.803114	Lower	7.44382e-06	1.00775e-05	1.19839e-05	2.38558e-05	0.000187533	0.000254247	1.895e-05	2.7109e-05	2.80994e-05	4.74246e-05	0.000374011	0.000407481
cg15297724	10	SYNPO2L	SYNPO2L;SYNPO2L	Body;Body	Island	1.03696e-05	0.0290219	1	12.5782	0.863805	13.0841	1.08514	Lower	1.26164e-05	1.59083e-05	1.94758e-05	2.27002e-05	6.97047e-05	5.2424e-05	2.30301e-05	3.13859e-05	3.45141e-05	4.73249e-05	0.000242659	0.000142121
cg20313753	2				S_Shelf	1.05815e-05	0.0294331	1	93.4719	1.45592	93.9263	1.34465	Lower	6.11397e-06	2.67413e-05	2.11144e-05	1.92493e-05	0.00299846	0.00654065	1.77638e-05	3.98398e-05	3.55121e-05	4.5119e-05	0.00328863	0.0067182
cg09305580	8	JRK;PSCA	JRK;JRK	5'UTR;5'UTR	N_Shore	1.07312e-05	0.0294577	1	7.39597	0.871372	6.96252	0.742633	Higher	5.88344e-06	1.78368e-05	4.54598e-06	3.3275e-05	0.000497134	7.49292e-05	1.76369e-05	3.24337e-05	2.17224e-05	5.55317e-05	0.000716122	0.000177593
cg03474941	17				S_Shelf	1.07675e-05	0.0294577	1	89.3408	2.44707	89.7572	2.82593	Lower	7.67164e-06	1.35139e-05	8.36092e-06	3.12719e-05	0.0129893	0.0122464	1.895e-05	3.01477e-05	2.38767e-05	5.36774e-05	0.0131398	0.0123308
cg05412855	6	TAP1;PSMB9	TAP1	Body	S_Shelf	1.07852e-05	0.0294577	1	97.3461	0.727995	97.6491	0.718818	Lower	8.53764e-06	1.79314e-05	3.19616e-05	4.0993e-05	0.00143026	0.00144662	1.9731e-05	3.24598e-05	4.35104e-05	5.95364e-05	0.00171236	0.00169767
cg26091232	3					1.08918e-05	0.0295106	1	52.5707	3.69718	50.4507	3.7906	Higher	1.33146e-05	1.39928e-05	2.45041e-05	2.70997e-05	0.000127214	8.50089e-05	2.33366e-05	3.01477e-05	3.78545e-05	5.0846e-05	0.000310078	0.000187398
cg09366342	1	PAX7	PAX7;PAX7;PAX7	Body;Body;Body	Island	1.09347e-05	0.0295106	1	6.76162	0.803785	7.27514	0.988589	Lower	1.23972e-05	1.30395e-05	2.2851e-06	9.72149e-06	0.000109949	8.79091e-05	2.30301e-05	3.01477e-05	1.87077e-05	3.49681e-05	0.000300259	0.000191551
cg12071544	16	CORO7-PAM16;VASN;CORO7	VASN;CORO7	5'UTR;Body	Island	1.10451e-05	0.029632	1	8.39965	0.993812	7.82649	0.940053	Higher	9.66138e-06	1.11939e-05	1.56903e-05	2.11643e-05	0.000106715	6.1513e-05	2.04745e-05	2.81113e-05	3.14835e-05	4.53944e-05	0.000300239	0.000155607
cg19584957	1	TTLL10-AS1;TTLL10	TTLL10;TTLL10	TSS1500;5'UTR	N_Shore	1.12571e-05	0.0300032	1	94.1301	1.28201	94.575	1.17306	Lower	5.4106e-06	1.1426e-05	1.30041e-05	2.36295e-05	0.00990262	0.00382908	1.74404e-05	2.8425e-05	2.91018e-05	4.73249e-05	0.0100878	0.00407884
cg12375903	15					1.13268e-05	0.0300032	1	86.2304	2.2404	86.7714	2.29112	Lower	7.58682e-06	1.45739e-05	1.03369e-05	2.61811e-05	0.00412848	0.0131313	1.895e-05	3.05713e-05	2.58873e-05	5.01505e-05	0.00437431	0.0132051
cg00171729	6	TRAM2	TRAM2	Body		1.14173e-05	0.0300032	1	94.5004	1.17432	94.9837	0.804282	Lower	1.02555e-05	8.46087e-06	4.90823e-05	2.19886e-05	0.00186256	0.00248495	2.11011e-05	2.64087e-05	5.82097e-05	4.6581e-05	0.00213872	0.00275799
cg11625877	19	TBC1D17	TBC1D17;TBC1D17	3'UTR;3'UTR	Island	1.14482e-05	0.0300032	1	92.3594	2.30788	90.8456	2.59006	Higher	8.09021e-06	1.56497e-05	9.27869e-06	3.86066e-05	2.02591e-05	6.79104e-06	1.91138e-05	3.11534e-05	2.47027e-05	5.9057e-05	0.000170017	4.0194e-05
cg10943398	11	SHANK2	SHANK2;SHANK2	Body;Body		1.16444e-05	0.0303421	1	92.5083	1.36094	91.6387	1.39548	Higher	7.37192e-06	1.54496e-05	9.32204e-06	3.74077e-05	7.40086e-06	7.31563e-06	1.895e-05	3.11534e-05	2.47027e-05	5.78555e-05	0.000132323	4.18127e-05
cg06150940	17	PTGES3L;PTGES3L-AARSD1;RUNDC1	AARSD1;AARSD1;RUNDC1;AARSD1;AARSD1;AARSD1;AARSD1;AARSD1	1stExon;1stExon;TSS200;TSS1500;5'UTR;5'UTR;5'UTR;1stExon	Island	1.17421e-05	0.0304219	1	4.80858	0.595418	5.11678	0.690664	Lower	7.50069e-06	1.11986e-05	2.09743e-05	4.5425e-05	0.000247155	0.000588474	1.895e-05	2.81113e-05	3.55022e-05	6.23428e-05	0.000444364	0.0007917
cg03801871	2	LBH	LBH	TSS1500	N_Shore	1.18103e-05	0.0304249	1	9.51331	1.42491	10.2096	1.31956	Lower	1.04279e-05	1.69606e-05	8.68912e-06	1.20814e-05	0.000121712	0.000131337	2.11914e-05	3.15833e-05	2.41885e-05	3.91847e-05	0.000307866	0.000249429
cg22454673	15	HERC2	HERC2	Body		1.19351e-05	0.0305725	1	85.8917	1.70695	84.9204	2.12634	Higher	6.98716e-06	1.20925e-05	7.17298e-06	3.34308e-05	2.08216e-05	2.15512e-07	1.89235e-05	2.93968e-05	2.3258e-05	5.55317e-05	0.000170017	5.17879e-06
cg12880658	5	CDO1	CDO1;CDO1	1stExon;5'UTR	Island	1.21664e-05	0.03099	1	6.90662	0.910476	6.45161	0.839438	Higher	7.14028e-06	1.54268e-05	1.51543e-05	4.98192e-05	0.000406666	0.000137513	1.89235e-05	3.11534e-05	3.08086e-05	6.48598e-05	0.00062718	0.000255029
cg15096140	2	AC092614.2;MYO1B	MYO1B;MYO1B;MYO1B	TSS1500;TSS1500;TSS1500	N_Shore	1.23122e-05	0.0310454	1	47.1596	2.76522	48.3454	2.58427	Lower	1.46254e-05	1.66576e-05	3.84567e-05	8.26571e-05	0.000488615	0.000312354	2.43762e-05	3.14891e-05	4.88704e-05	9.0067e-05	0.000716122	0.000484049
cg02903601	20	ZNFX1-AS1_2;SNORD12B;SNORD12C;ZFAS1;ZNFX1	SNORD12B;C20orf199;SNORD12C;MIR1259;C20orf199;ZNFX1;C20orf199	TSS1500;Body;TSS200;TSS1500;Body;TSS1500;Body	S_Shore	1.25487e-05	0.0310454	1	3.74808	0.458457	4.02649	0.498795	Lower	1.15614e-05	1.00856e-05	1.38701e-05	1.36145e-05	9.29115e-05	0.00010816	2.23168e-05	2.7109e-05	2.96062e-05	4.02323e-05	0.000287548	0.000220086
cg13177458	8	ANXA13	ANXA13;ANXA13	Body;Body		1.25627e-05	0.0310454	1	81.136	2.77793	82.2264	3.13524	Lower	1.12984e-05	1.8197e-05	3.21837e-05	0.000114431	0.00117016	0.00132174	2.21902e-05	3.25368e-05	4.35104e-05	0.000118373	0.00143765	0.00156
cg17484976	20	CABLES2;RP5-908M14.10	CABLES2	TSS200	Island	1.2566e-05	0.0310454	1	9.73154	0.94698	10.2524	0.944255	Lower	9.86158e-06	1.65874e-05	2.67286e-05	4.42136e-05	0.000101224	0.000125031	2.07608e-05	3.14891e-05	3.96295e-05	6.15875e-05	0.000295015	0.000241667
cg19075346	2	SLC40A1	SLC40A1;SLC40A1	5'UTR;1stExon	N_Shore	1.25704e-05	0.0310454	1	9.06741	0.98252	9.62263	0.96987	Lower	9.67475e-06	1.55652e-05	2.33232e-05	1.10973e-05	0.00012126	6.00156e-05	2.04745e-05	3.11534e-05	3.75416e-05	3.72292e-05	0.000307405	0.000155607
cg02246928	6					1.2599e-05	0.0310454	1	33.8387	3.4588	35.5703	3.60986	Lower	1.16542e-05	1.47413e-05	7.01706e-05	4.77511e-05	0.000236036	0.00015604	2.23955e-05	3.06115e-05	7.67113e-05	6.35656e-05	0.000426615	0.000274822
cg25954642	7	CLCN1	CLCN1	TSS1500		1.27064e-05	0.0311408	1	93.5601	1.34005	94.128	1.20215	Lower	1.39846e-05	1.69258e-05	3.98052e-05	6.23073e-06	0.00090926	0.00119768	2.4009e-05	3.15833e-05	5.00153e-05	2.97264e-05	0.00115859	0.00145
cg19009018	2	GAD1	GAD1;GAD1	Body;Body		1.27905e-05	0.03117	1	95.8285	0.855123	96.2441	0.809525	Lower	1.55042e-05	1.64746e-05	2.02633e-05	2.08278e-05	0.000315941	0.00039339	2.57654e-05	3.14891e-05	3.5106e-05	4.52634e-05	0.000535207	0.000576502
cg00619497	13	LINC00441;RB1	RB1	Body	S_Shore	1.29184e-05	0.03117	1	10.2869	1.73816	11.2409	1.88554	Lower	1.32567e-05	1.44092e-05	7.72538e-06	2.39084e-05	4.18323e-05	4.56561e-06	2.33366e-05	3.05713e-05	2.3258e-05	4.74246e-05	0.000221027	3.02239e-05
cg27665808	2					1.29542e-05	0.03117	1	46.5857	5.44907	49.3243	6.25154	Lower	9.48222e-06	1.95711e-05	6.56895e-06	5.30834e-05	0.000739716	0.000330138	2.0299e-05	3.39196e-05	2.32483e-05	6.6699e-05	0.000972867	0.000503684
cg09269619	4	PCGF3	PCGF3	5'UTR	N_Shore	1.31772e-05	0.03117	1	85.1001	2.18501	85.754	2.16836	Lower	1.29258e-05	1.56851e-05	5.56015e-06	1.12134e-05	0.00472992	0.00620951	2.31711e-05	3.11534e-05	2.20309e-05	3.72351e-05	0.00492654	0.00641416
cg21562321	12	RP11-54A9.1				1.32694e-05	0.03117	1	93.7622	1.02349	94.2401	1.14955	Lower	7.84248e-06	1.3708e-05	9.48174e-06	1.75992e-05	0.000393559	0.000498709	1.895e-05	3.01477e-05	2.48192e-05	4.44693e-05	0.000614705	0.000707229
cg20398560	2	AC074363.1				1.33031e-05	0.03117	1	95.8822	1.35995	96.2582	1.37137	Lower	1.37383e-05	1.63178e-05	ns	1.79899e-05	ns	ns	2.38179e-05	3.14891e-05	NA	4.45019e-05	NA	NA
cg22697825	1	CAPN2	CAPN2;CAPN2	TSS1500;Body	N_Shore	1.3304e-05	0.03117	1	72.1997	2.66512	73.1468	2.82401	Lower	1.77631e-05	2.17686e-05	3.33985e-05	1.24065e-05	0.00388698	0.00187737	2.66648e-05	3.59226e-05	4.4494e-05	3.94924e-05	0.00415411	0.00213482
cg20590109	11	OSBPL5	OSBPL5;OSBPL5;OSBPL5	Body;Body;Body		1.33103e-05	0.03117	1	94.4706	1.33462	93.5101	2.13146	Higher	1.13857e-05	1.61485e-05	4.19157e-06	3.50618e-05	0.000127368	3.04545e-05	2.22711e-05	3.14531e-05	2.17224e-05	5.66894e-05	0.000310078	0.000102937
cg24709511	1				S_Shore	1.33979e-05	0.03117	1	94.4917	0.910135	93.9479	1.25815	Higher	8.13112e-06	2.17404e-05	7.55193e-06	2.36292e-05	5.64513e-05	2.53163e-07	1.91138e-05	3.5914e-05	2.3258e-05	4.73249e-05	0.000239496	5.17879e-06
cg08200770	17	TBCD	TBCD	Body		1.34058e-05	0.03117	1	87.8118	2.17251	86.2671	2.42753	Higher	1.10958e-05	1.67073e-05	7.909e-06	1.34513e-05	2.49968e-05	6.60529e-06	2.21416e-05	3.14891e-05	2.3258e-05	4.02323e-05	0.000184314	4.01931e-05
cg04556432	14	SETD3	SETD3;SETD3	Body;Body		1.36327e-05	0.0314437	1	96.2396	0.836563	96.5951	0.65684	Lower	1.1643e-05	1.63025e-05	3.71095e-05	1.3424e-05	0.000874782	0.00125877	2.23168e-05	3.14891e-05	4.78997e-05	4.02323e-05	0.00112671	0.00149849
cg19597776	18	TCF4	TCF4;TCF4	5'UTR;5'UTR	N_Shelf	1.36622e-05	0.0314437	1	13.5435	2.11964	12.6213	1.95012	Higher	2.30783e-05	1.69797e-05	1.79863e-05	8.17634e-05	0.000578928	0.000926393	3.02421e-05	3.15833e-05	3.393e-05	8.93435e-05	0.000806311	0.00117148
cg20764575	7	DF5	DFNA5;DFNA5;DFNA5	TSS1500;TSS1500;TSS1500	S_Shore	1.37609e-05	0.0314821	1	69.255	4.48815	70.7687	4.27726	Lower	1.71032e-05	1.53173e-05	2.52598e-05	5.29836e-05	0.00378643	0.00100532	2.64843e-05	3.11534e-05	3.87728e-05	6.6699e-05	0.00407066	0.00125667
cg16669602	16					1.38994e-05	0.0314821	1	69.4435	3.95301	67.9657	4.08544	Higher	1.97401e-05	2.58686e-05	2.36334e-05	5.97316e-05	0.00200487	0.000122663	2.80688e-05	3.9581e-05	3.75416e-05	7.07072e-05	0.00226506	0.000239026
cg16709385	20	COL9A3	COL9A3	TSS1500	N_Shore	1.39272e-05	0.0314821	1	17.8948	2.23172	17.0208	2.16397	Higher	1.02948e-05	3.2366e-05	1.40995e-06	4.06827e-05	0.00404354	0.00133094	2.11011e-05	4.24584e-05	1.72343e-05	5.95364e-05	0.00429107	0.00156691
cg11654037	19	CSNK1G2;CSNK1G2-AS1	C19orf34;CSNK1G2	TSS200;5'UTR	N_Shore	1.40885e-05	0.0314821	1	91.9101	1.32562	92.4075	1.06492	Lower	9.93617e-06	1.45953e-05	1.59292e-05	2.06128e-05	0.0031668	0.00255441	2.08136e-05	3.05713e-05	3.17159e-05	4.52634e-05	0.00344486	0.0028275
cg10249997	11	ADAMTS15	ADAMTS15	TSS1500	N_Shore	1.41654e-05	0.0314821	1	16.7338	2.74731	18.2715	3.36188	Lower	1.18686e-05	2.29616e-05	2.90208e-05	3.37466e-05	7.55982e-05	0.000259468	2.26638e-05	3.69364e-05	4.13439e-05	5.55317e-05	0.000256274	0.000413586
cg09186478	X	ZBTB33	ZBTB33	5'UTR	Island	1.42096e-05	0.0314821	1	30.8821	23.5161	28.3961	22.5709	Higher	1.24387e-05	1.40367e-05	6.39574e-06	8.81578e-06	0.00105115	0.00115035	2.30301e-05	3.01477e-05	2.32483e-05	3.411e-05	0.001316	0.00140763
cg06530336	7	ZNF107	ZNF107;ZNF107	5'UTR;5'UTR	Island	1.42222e-05	0.0314821	1	6.58873	0.659337	6.96194	0.680202	Lower	9.48094e-06	1.76287e-05	9.04467e-06	2.91283e-05	0.000150551	8.41266e-05	2.0299e-05	3.22242e-05	2.4505e-05	5.17789e-05	0.000333976	0.000187398
cg23125506	15	RP11-540O11.1				1.42344e-05	0.0314821	1	32.799	3.96741	34.1236	4.07722	Lower	1.66017e-05	1.27403e-05	6.03881e-05	4.40924e-05	0.00150864	0.000793696	2.64843e-05	3.01477e-05	6.77702e-05	6.15875e-05	0.00179104	0.00102513
cg06246094	15	SPTBN5	SPTBN5	Body	Island	1.43141e-05	0.0315047	1	25.428	2.9855	24.0745	3.01614	Higher	1.66858e-05	1.42923e-05	1.92084e-05	3.51804e-05	0.000600875	0.000366717	2.64843e-05	3.05713e-05	3.45141e-05	5.66894e-05	0.000826102	0.000542584
cg10080401	22	MAPK1	MAPK1;MAPK1	Body;Body		1.44395e-05	0.0316272	1	87.6382	1.77128	86.8033	1.80612	Higher	1.76676e-05	1.48852e-05	3.80148e-05	1.46544e-05	0.000118694	4.68537e-06	2.66648e-05	3.06908e-05	4.85627e-05	4.15769e-05	0.000306466	3.02239e-05
cg00632466	8					1.47418e-05	0.0321341	1	4.34374	0.535143	4.07314	0.439309	Higher	1.31195e-05	2.54474e-05	9.76403e-06	2.7766e-05	0.000359913	0.000138046	2.33094e-05	3.89741e-05	2.51673e-05	5.13961e-05	0.000580944	0.000255029
cg02062731	16	HAS3	HAS3	TSS1500	N_Shore	1.48471e-05	0.0321715	1	4.21804	0.607635	4.57018	0.707148	Lower	1.30461e-05	2.89037e-05	0.000139403	4.89409e-05	0.000223066	7.01816e-05	2.32406e-05	4.16468e-05	0.000142014	6.45753e-05	0.000414706	0.000170745
cg19706795	7	DF5	DFNA5;DFNA5;DFNA5	TSS1500;TSS1500;TSS1500	S_Shore	1.49009e-05	0.0321715	1	83.429	2.63349	84.3826	2.87267	Lower	1.22535e-05	1.94e-05	4.43437e-05	3.88472e-05	0.000702685	0.000225111	2.30301e-05	3.39196e-05	5.42244e-05	5.9057e-05	0.000930732	0.000372039
cg19579755	6	FAM26F;RP1-93H18.6	FAM26F	TSS200	N_Shore	1.52737e-05	0.0327654	1	96.0351	1.01397	96.4371	0.82463	Lower	2.33224e-05	1.3834e-05	1.85867e-05	1.64385e-05	0.000602121	0.00151657	3.02421e-05	3.01477e-05	3.43735e-05	4.37718e-05	0.000826102	0.00176864
cg14723921	6					1.53205e-05	0.0327654	1	11.2244	1.58231	11.9129	1.65338	Lower	1.05843e-05	1.39714e-05	2.43801e-05	7.91353e-05	9.61355e-05	0.000390569	2.14834e-05	3.01477e-05	3.78545e-05	8.79147e-05	0.000291251	0.000575809
cg17453671	1	PIGR	PIGR	Body		1.54031e-05	0.0327875	1	92.0591	1.06627	92.4833	1.10077	Lower	1.73539e-05	1.71696e-05	4.68441e-06	1.0665e-05	0.00100093	0.00243952	2.64843e-05	3.1799e-05	2.17224e-05	3.65342e-05	0.00126174	0.00272154
cg25741118	1	LDLRAD1	LDLRAD1	Body		1.55815e-05	0.032953	1	91.1984	2.16883	92.0825	1.94588	Lower	2.14392e-05	1.80634e-05	2.58407e-05	5.8747e-05	0.000317924	0.000410507	2.93862e-05	3.25114e-05	3.9208e-05	6.99601e-05	0.000536179	0.000598251
cg26500063	1	MEX3A;LM	MEX3A	TSS1500	Island	1.56444e-05	0.032953	1	2.81956	0.419831	2.59264	0.317946	Higher	1.78017e-05	1.97401e-05	6.61155e-05	4.14973e-05	0.000196942	0.000132401	2.66648e-05	3.39377e-05	7.26522e-05	6.00324e-05	0.000381814	0.00025007
cg05717553	12	CCNT1	CCNT1	TSS200	Island	1.56989e-05	0.032953	1	6.04394	0.633739	5.67213	0.606392	Higher	1.45807e-05	2.02148e-05	3.5126e-05	2.32826e-05	6.54859e-05	3.4841e-05	2.43762e-05	3.41777e-05	4.62682e-05	4.73249e-05	0.0002397	0.00010933
cg01891252	1				Island	1.6025e-05	0.0334824	1	8.11246	1.20375	7.46913	1.0857	Higher	1.77042e-05	2.21772e-05	1.26361e-05	2.59771e-05	6.20072e-05	1.73195e-05	2.66648e-05	3.61184e-05	2.89646e-05	5.00203e-05	0.0002397	7.3282e-05
cg21142743	1	ARF1	ARF1;ARF1;ARF1;ARF1	5'UTR;5'UTR;5'UTR;5'UTR	S_Shore	1.62779e-05	0.0338208	1	25.6602	4.22548	24.1422	3.9551	Higher	1.24295e-05	2.00341e-05	2.67281e-05	7.76755e-06	0.000657485	2.16266e-05	2.30301e-05	3.3991e-05	3.96295e-05	3.0867e-05	0.000879117	8.1432e-05
cg21284119	6	WRNIP1	WRNIP1;WRNIP1	TSS1500;TSS1500	N_Shore	1.641e-05	0.0338208	1	16.2029	2.56563	15.2224	2.54346	Higher	3.19963e-05	2.66371e-05	0.000112722	0.000174359	0.00308915	0.00351447	3.60952e-05	3.98398e-05	0.000117036	0.000174923	0.00337744	0.00375929
cg05178654	12	RNU4-2				1.64381e-05	0.0338208	1	7.51048	1.27129	8.28907	1.29789	Lower	8.85264e-06	1.64626e-05	4.52557e-06	1.12789e-05	6.40733e-05	5.69868e-05	1.99592e-05	3.14891e-05	2.17224e-05	3.72409e-05	0.0002397	0.000151331
cg17008164	15	RP11-16E12.1			Island	1.64853e-05	0.0338208	1	12.8568	1.28376	13.5762	1.29157	Lower	2.70451e-05	1.72958e-05	4.55368e-05	4.73409e-05	0.000159604	0.000172865	3.24857e-05	3.18286e-05	5.49792e-05	6.31222e-05	0.000345747	0.000299179
cg24313592	11	CLPB	CLPB	Body		1.65698e-05	0.033841	1	92.8007	1.53868	93.2941	1.31906	Lower	1.84085e-05	2.11063e-05	1.9425e-05	7.42688e-06	0.0100657	0.00472179	2.70295e-05	3.50741e-05	3.45141e-05	3.0867e-05	0.0102638	0.00495666
cg27611857	2	MGAT4A	MGAT4A	TSS1500	Island	1.6973e-05	0.0339699	1	7.26216	0.911583	6.77807	0.803426	Higher	1.43949e-05	2.50006e-05	1.79893e-05	1.9267e-05	0.000203375	0.000119698	2.43762e-05	3.85163e-05	3.393e-05	4.5119e-05	0.000387452	0.000234404
cg05256656	16	SLC9A5	SLC9A5	Body		1.69843e-05	0.0339699	1	83.0424	2.0202	81.8071	2.40944	Higher	1.37863e-05	1.95984e-05	8.90929e-06	1.36461e-05	0.000125235	1.86953e-07	2.38822e-05	3.39196e-05	2.43411e-05	4.02323e-05	0.000309211	5.17879e-06
cg01204210	10				Island	1.70121e-05	0.0339699	1	8.98918	1.19443	9.55821	1.47745	Lower	1.72034e-05	1.48309e-05	1.9559e-05	2.75075e-05	0.000207577	0.00034688	2.64843e-05	3.06514e-05	3.4529e-05	5.10907e-05	0.00039499	0.000515035
cg13392793	11					1.70196e-05	0.0339699	1	69.2159	3.85766	70.7003	4.09759	Lower	5.7013e-06	1.79703e-05	9.81795e-06	2.22558e-05	0.000749824	0.00146427	1.75856e-05	3.24857e-05	2.51673e-05	4.69539e-05	0.000982578	0.00170409
cg22212829	20	CSNK2A1	CSNK2A1;CSNK2A1;CSNK2A1	TSS200;TSS200;TSS200	S_Shore	1.7062e-05	0.0339699	1	6.46584	0.958058	5.99231	0.929652	Higher	2.19439e-05	1.90924e-05	2.73062e-05	3.00033e-05	0.000418305	0.000420526	2.9433e-05	3.36693e-05	4.02035e-05	5.23963e-05	0.000638894	0.000608111
cg17813874	2				N_Shelf	1.70825e-05	0.0339699	1	84.8384	2.22139	83.5231	2.57069	Higher	1.85537e-05	2.7052e-05	4.46364e-05	5.12051e-05	0.00018534	3.69636e-05	2.71544e-05	4.0278e-05	5.42394e-05	6.60027e-05	0.000373978	0.000112492
cg14669379	1	ADORA3	ADORA3	Body	Island	1.71901e-05	0.03397	1	8.57339	1.50652	7.86688	1.10941	Higher	1.41408e-05	1.56559e-05	2.60325e-05	1.82289e-05	0.000167717	3.70104e-05	2.40716e-05	3.11534e-05	3.9208e-05	4.45019e-05	0.000352894	0.000112492
cg08629884	4	TMEM129	TMEM129;TMEM129	Body;Body	N_Shelf	1.72531e-05	0.03397	1	96.6963	0.502703	96.8863	0.44932	Lower	1.66935e-05	2.65317e-05	8.53285e-05	4.0908e-05	0.00278899	0.00582811	2.64843e-05	3.98398e-05	9.08421e-05	5.95364e-05	0.00306737	0.00605485
cg14836490	2	MEIS1	MEIS1	Body		1.73073e-05	0.03397	1	94.1251	1.31363	93.2226	1.66194	Higher	5.57329e-06	1.40032e-05	9.88207e-06	1.33545e-05	6.16939e-05	2.24767e-05	1.75092e-05	3.01477e-05	2.51673e-05	4.02323e-05	0.0002397	8.15625e-05
cg23144681	10				S_Shore	1.73837e-05	0.0339729	1	3.77664	0.451642	4.02588	0.468095	Lower	3.02076e-05	2.40119e-05	2.27288e-05	2.41009e-05	0.00011028	0.00016595	3.44753e-05	3.8056e-05	3.72083e-05	4.75223e-05	0.000300259	0.000288396
cg00026412	10	ANK3	ANK3	Body		1.75925e-05	0.0341637	1	95.1727	0.801697	95.5919	0.93573	Lower	1.97631e-05	2.34609e-05	1.54418e-05	1.98831e-05	0.000356618	0.000345232	2.81056e-05	3.75802e-05	3.10471e-05	4.5119e-05	0.000578586	0.000514091
cg16633951	10	LINC00839;CCNYL2	LOC84856	Body	Island	1.7632e-05	0.0341637	1	14.7309	5.26168	18.1117	6.40676	Lower	2.44671e-05	1.82507e-05	1.51349e-05	3.99605e-05	0.000259961	0.000135496	3.11007e-05	3.2562e-05	3.08086e-05	5.9451e-05	0.000456447	0.000253209
cg23164076	6					1.78356e-05	0.0344111	1	82.626	2.86157	83.8855	2.88656	Lower	1.59691e-05	2.40128e-05	5.25757e-05	2.95858e-05	5.46713e-05	0.000412974	2.62511e-05	3.8056e-05	6.13938e-05	5.21786e-05	0.000239496	0.00059885
cg24877616	13				S_Shore	1.7913e-05	0.0344139	1	89.4208	1.63404	90.112	1.44281	Lower	1.68536e-05	2.85019e-05	2.54958e-05	3.66435e-05	0.00049657	0.000831019	2.64843e-05	4.13851e-05	3.89211e-05	5.72399e-05	0.000716122	0.0010656
cg03754705	19	PPP6R1	SAPS1	5'UTR	N_Shore	1.80087e-05	0.034452	1	86.3051	1.87602	87.2084	2.26602	Lower	1.58542e-05	3.13828e-05	1.04873e-05	2.85328e-05	0.000443457	0.000592364	2.62511e-05	4.21704e-05	2.62152e-05	5.17789e-05	0.000663618	0.000794249
cg23221113	22	ODF3B	ODF3B;ODF3B	5'UTR;1stExon	S_Shore	1.81035e-05	0.0344877	1	6.85243	1.33946	7.54087	1.60044	Lower	2.14129e-05	1.9837e-05	1.47594e-05	2.90952e-05	0.000336946	0.000538827	2.93862e-05	3.39557e-05	3.06571e-05	5.17789e-05	0.000560673	0.000752604
cg11212511	5	ARHGEF28	RGNEF	Body		1.82321e-05	0.0345875	1	90.6183	2.09874	89.3885	2.49264	Higher	1.61382e-05	2.09659e-05	2.37004e-05	3.56481e-05	0.000187225	3.61988e-05	2.63013e-05	3.50741e-05	3.75416e-05	5.693e-05	0.000374011	0.000111864
cg01691989	3	ILDR1	ILDR1	Body	Island	1.84393e-05	0.0348347	1	97.0448	0.563907	97.2013	0.535704	Lower	1.31719e-05	2.43776e-05	7.80271e-06	2.89268e-05	0.00809293	0.015584	2.33366e-05	3.8056e-05	2.3258e-05	5.17789e-05	0.00826587	0.0156832
cg19135706	5	RAB3C	RAB3C	TSS1500	N_Shore	1.87114e-05	0.0352021	1	11.2956	1.71607	10.3999	1.62066	Higher	1.21222e-05	2.76789e-05	4.1919e-05	8.5844e-05	0.000146589	0.000216648	2.29295e-05	4.06911e-05	5.19615e-05	9.26444e-05	0.00033097	0.000365219
cg12228229	17	ACADVL;DLG4	DLG4;ACADVL;DLG4;ACADVL;DLG4	5'UTR;TSS1500;TSS1500;TSS1500;1stExon	N_Shore	1.92755e-05	0.0359096	1	92.7437	1.33614	91.9165	1.80487	Higher	2.22544e-05	2.22683e-05	2.1624e-05	6.70101e-05	6.45271e-05	4.46722e-07	2.95805e-05	3.61184e-05	3.60319e-05	7.6716e-05	0.0002397	6.5685e-06
cg06292891	6	TNXB;ATF6B	TNXB	5'UTR		1.94507e-05	0.0359096	1	72.3427	3.19559	73.5024	3.19287	Lower	2.26402e-05	2.44368e-05	7.29324e-06	2.96187e-05	0.0022826	0.000690925	2.9741e-05	3.8056e-05	2.3258e-05	5.21786e-05	0.00254386	0.00091406
cg08506046	3	NR1D2;NKIRAS1	NR1D2;NR1D2	TSS1500;Body	Island	1.94643e-05	0.0359096	1	7.37113	0.831221	6.88293	0.835417	Higher	1.87388e-05	1.34145e-05	2.42803e-05	2.08922e-05	0.000103928	4.22239e-05	2.71544e-05	3.01477e-05	3.78545e-05	4.52634e-05	0.000296242	0.000123913
cg24521811	11	RP4-541C22.5	C11orf91	3'UTR	N_Shore	1.94703e-05	0.0359096	1	83.0247	2.12797	84.0363	2.24798	Lower	1.81632e-05	1.99258e-05	1.9869e-05	4.90781e-05	0.000146867	0.000250462	2.68397e-05	3.39734e-05	3.47329e-05	6.46142e-05	0.00033097	0.000406124
cg21693907	1	ATP2B4	ATP2B4;ATP2B4	TSS1500;TSS1500	N_Shelf	1.94835e-05	0.0359096	1	6.3841	0.770453	6.06317	0.74827	Higher	2.08675e-05	3.32566e-05	0.000180213	0.000170732	0.00130084	0.000283504	2.93374e-05	4.26375e-05	0.000181444	0.000172364	0.0015717	0.00044583
cg09133511	2					1.96934e-05	0.0361494	1	33.9812	5.4008	32.5007	5.50526	Higher	8.90484e-06	1.38208e-05	1.32776e-05	1.30896e-05	0.00194251	9.21133e-06	1.99592e-05	3.01477e-05	2.91517e-05	4.02323e-05	0.00221714	4.7564e-05
cg06902764	X	SOX3	SOX3	1stExon	Island	1.99528e-05	0.0364781	1	18.4607	12.4439	16.6578	11.1839	Higher	1.73953e-05	3.3911e-05	6.60495e-06	2.88982e-05	0.00436487	0.00488468	2.64843e-05	4.27782e-05	2.32483e-05	5.17789e-05	0.00457922	0.00509629
cg00354884	17	ABR	ABR;ABR	Body;5'UTR		2.02603e-05	0.0368914	1	90.3015	2.75965	89.1214	3.48676	Higher	2.33179e-05	3.16158e-05	2.23023e-05	2.1646e-05	0.000348424	2.60997e-07	3.02421e-05	4.21704e-05	3.67122e-05	4.5991e-05	0.000573895	5.17879e-06
cg20715295	19	PRR19;PAFAH1B3	PAFAH1B3;PRR19;PAFAH1B3;PAFAH1B3	TSS1500;5'UTR;TSS1500;TSS1500	S_Shore	2.03545e-05	0.0369147	1	37.7169	4.51432	35.4125	5.30364	Higher	1.70186e-05	3.30908e-05	1.47033e-05	3.04327e-05	0.000598539	0.00071543	2.64843e-05	4.26375e-05	3.06571e-05	5.261e-05	0.000826102	0.000938573
cg02735652	1	BAI2	BAI2	5'UTR	Island	2.04548e-05	0.0369488	1	4.92999	0.62259	4.6066	0.504719	Higher	1.02604e-05	2.75061e-05	3.6259e-05	4.0192e-05	0.000260996	0.000119086	2.11011e-05	4.05545e-05	4.75177e-05	5.95148e-05	0.000456447	0.000233661
cg27226238	2	REG1P	REG1P	TSS200		2.06488e-05	0.0371157	1	93.3894	1.36426	93.771	1.44579	Lower	1.39972e-05	2.9824e-05	7.6656e-05	0.000112684	0.00256317	0.00622649	2.4009e-05	4.18304e-05	8.28536e-05	0.000117657	0.00283106	0.00641724
cg21078994	2	MBOAT2	MBOAT2	TSS200	Island	2.07109e-05	0.0371157	1	6.71345	0.718757	7.05165	0.812041	Lower	1.29231e-05	3.86466e-05	4.02435e-05	7.59109e-05	0.00148864	0.00112924	2.31711e-05	4.45815e-05	5.01834e-05	8.53311e-05	0.00177854	0.00139219
cg24968176	7	TRRAP	TRRAP	Body		2.0826e-05	0.037175	1	91.8488	1.53457	90.7863	1.84218	Higher	1.1628e-05	3.85803e-05	3.16831e-05	4.20799e-05	2.93667e-05	6.91419e-06	2.23168e-05	4.45815e-05	4.35104e-05	6.0439e-05	0.000197076	4.0194e-05
cg16645440	1	PRRC2C	BAT2L2	Body		2.10547e-05	0.0374181	1	83.4092	2.77003	84.4892	2.88611	Lower	2.38167e-05	2.41888e-05	5.47799e-05	2.87214e-05	0.00277374	0.00337476	3.0681e-05	3.8056e-05	6.3373e-05	5.17789e-05	0.00305431	0.00364037
cg11671075	10	DIP2C	DIP2C	Body		2.11273e-05	0.0374181	1	93.6022	1.23616	94.2531	1.23492	Lower	2.18602e-05	2.40797e-05	3.14416e-05	4.61768e-05	0.00016389	0.000136827	2.9433e-05	3.8056e-05	4.35104e-05	6.29849e-05	0.000348384	0.000255029
cg15111626	12	FBRSL1	FBRSL1	Body	N_Shore	2.12741e-05	0.0375316	1	89.17	1.4634	89.7968	1.70426	Lower	1.1309e-05	1.95681e-05	3.19389e-05	8.46925e-05	0.00106879	0.000776105	2.21902e-05	3.39196e-05	4.35104e-05	9.19808e-05	0.00132779	0.0010088
cg04058675	X	HUWE1	HUWE1	Body		2.14916e-05	0.0377436	1	87.1868	2.35809	88.1996	1.97325	Lower	1.62451e-05	3.30212e-05	4.91317e-05	7.26462e-05	0.000390216	0.000269109	2.63511e-05	4.26375e-05	5.82097e-05	8.21355e-05	0.000614133	0.000426105
cg00626390	2	TPO	TPO;TPO;TPO;TPO	Body;Body;Body;Body	N_Shore	2.15608e-05	0.0377436	1	94.9572	1.14152	95.5115	1.32103	Lower	1.82032e-05	2.19891e-05	4.46314e-05	3.63783e-05	0.000499023	0.000551704	2.68397e-05	3.60952e-05	5.42394e-05	5.72399e-05	0.000716122	0.000759504
cg02712399	X	FAM156A			N_Shore	2.17852e-05	0.0379537	1	83.3422	5.484	84.4091	4.63697	Lower	2.64343e-05	2.83368e-05	1.89861e-05	1.42425e-05	0.00349855	0.00880898	3.19668e-05	4.12527e-05	3.45141e-05	4.07712e-05	0.00377077	0.00897668
cg08250880	11	PRSS23				2.18856e-05	0.0379537	1	93.2802	1.27801	93.7029	1.32198	Lower	2.5518e-05	4.06246e-05	9.63993e-05	0.000152853	0.0019653	0.00348897	3.15833e-05	4.60701e-05	0.000100952	0.000155461	0.00223782	0.00374852
cg24217894	12	AGAP2;AGAP2-AS1	LOC100130776;AGAP2;AGAP2	Body;Body;Body	Island	2.19319e-05	0.0379537	1	91.5802	3.00521	89.7144	3.79719	Higher	1.25237e-05	2.65465e-05	1.68636e-05	9.47339e-05	0.000401567	0.000154015	2.30301e-05	3.98398e-05	3.2699e-05	9.99758e-05	0.000624595	0.000273858
cg12646820	6	RNF182	RNF182;RNF182;RNF182;RNF182	TSS1500;TSS1500;TSS1500;TSS1500	N_Shore	2.20787e-05	0.0380625	1	46.4856	4.80967	48.4562	5.34484	Lower	2.574e-05	3.23464e-05	4.00478e-05	5.08111e-05	0.00173546	6.50262e-05	3.16244e-05	4.24584e-05	5.00997e-05	6.57106e-05	0.00202551	0.000160656
cg13117369	11	MIR6750;ATG2A	ATG2A	Body	S_Shelf	2.22024e-05	0.0381307	1	95.8566	0.467488	96.0301	0.473813	Lower	3.47325e-05	3.36012e-05	5.12144e-05	6.69943e-05	0.00429172	0.00433457	3.77917e-05	4.27329e-05	6.01321e-05	7.6716e-05	0.00451832	0.0045598
cg16418630	9	URM1	URM1;URM1	Body;Body	Island	2.24829e-05	0.0384667	1	3.02982	0.408193	2.80183	0.430995	Higher	1.90354e-05	2.7528e-05	6.5028e-05	8.00872e-05	6.55644e-05	4.49146e-05	2.73802e-05	4.05545e-05	7.20735e-05	8.84701e-05	0.0002397	0.000129216
cg11229612	13					2.26604e-05	0.0385549	1	85.3605	2.55119	86.64	2.50084	Lower	3.42215e-05	2.62373e-05	5.36724e-05	3.87058e-05	0.000459832	0.000524671	3.75704e-05	3.97192e-05	6.24843e-05	5.9057e-05	0.000683636	0.000738526
cg00521048	13	RCBTB1	RCBTB1	TSS200	Island	2.27045e-05	0.0385549	1	24.7927	2.8346	26.2506	3.12978	Lower	2.55676e-05	2.81077e-05	5.59142e-05	1.99421e-05	9.48025e-05	0.000154821	3.16039e-05	4.11193e-05	6.41702e-05	4.5119e-05	0.000289795	0.000274343
cg24923311	20	TM9SF4	TM9SF4;TM9SF4	1stExon;5'UTR		2.28016e-05	0.0385754	1	3.2255	0.354632	3.0576	0.414672	Higher	1.2692e-05	3.12984e-05	4.20264e-06	3.21707e-05	0.00039168	0.000337965	2.30301e-05	4.21704e-05	2.17224e-05	5.47256e-05	0.000614133	0.000509704
cg09261262	10	OPN4	OPN4;OPN4	1stExon;1stExon		2.30079e-05	0.0387796	1	87.8487	1.79433	88.7021	1.74694	Lower	4.62123e-05	3.87109e-05	4.85377e-05	2.42458e-05	0.00035161	0.000574902	4.7452e-05	4.45815e-05	5.78623e-05	4.75223e-05	0.000577078	0.000776971
cg02265288	14					2.34719e-05	0.0394151	1	82.0357	2.90082	80.252	3.38287	Higher	2.79936e-05	2.94606e-05	7.6135e-05	6.55366e-05	1.42649e-05	3.33864e-06	3.30022e-05	4.18304e-05	8.26793e-05	7.56845e-05	0.00015228	2.46898e-05
cg19433066	3	SUCLG2;SUCLG2-AS1	SUCLG2	TSS200	S_Shore	2.36593e-05	0.0394908	1	5.24316	1.03206	4.77187	0.72845	Higher	1.70644e-05	2.473e-05	1.36532e-05	3.12988e-05	0.000812063	0.000145282	2.64843e-05	3.82094e-05	2.95137e-05	5.36774e-05	0.0010528	0.000264082
cg22112051	19	LLfos-48D6.2;LINGO3	LINGO3	Body	Island	2.36963e-05	0.0394908	1	7.03091	0.872729	6.61391	0.718177	Higher	1.82102e-05	3.79974e-05	4.985e-05	0.000142272	0.00159057	0.000559221	2.68397e-05	4.45815e-05	5.87884e-05	0.000145062	0.00185665	0.000760805
cg07259398	16	AC005606.14;SYNGR3	SYNGR3;SYNGR3	5'UTR;1stExon	N_Shore	2.37783e-05	0.0394908	1	5.28476	0.602688	5.60137	0.630162	Lower	3.31072e-05	3.03761e-05	0.000127985	0.00012337	0.000213813	0.000251145	3.68968e-05	4.18822e-05	0.000131488	0.000127022	0.000404342	0.000406124
cg19389370	11	SBF2	SBF2	Body		2.39474e-05	0.0396265	1	94.893	1.07256	95.2748	1.19126	Lower	2.72671e-05	2.24524e-05	2.93453e-05	3.35181e-05	0.00153354	0.00267127	3.25368e-05	3.62872e-05	4.13439e-05	5.55317e-05	0.00180906	0.00293466
cg27174837	10	PROSER2	C10orf47	TSS1500	Island	2.41231e-05	0.0397722	1	8.79066	1.17716	8.21215	1.13513	Higher	2.82624e-05	2.93052e-05	3.44762e-05	8.78504e-05	0.000336636	2.83677e-05	3.30022e-05	4.18304e-05	4.56368e-05	9.46423e-05	0.000560673	9.82275e-05
cg07014351	13	WBP4;ELF1	WBP4;WBP4	5'UTR;1stExon	Island	2.43007e-05	0.0399198	1	8.00194	0.998577	8.55681	1.19541	Lower	2.42932e-05	3.69306e-05	7.19289e-05	2.63951e-05	0.000370112	0.000713546	3.11007e-05	4.43971e-05	7.83419e-05	5.02794e-05	0.000592	0.000938573
cg25248045	2	MAP4K4	MAP4K4;MAP4K4;MAP4K4	Body;Body;Body		2.45029e-05	0.0401067	1	95.6367	0.827282	95.9324	0.747241	Lower	3.23033e-05	4.69611e-05	0.000161033	3.36284e-05	0.00389765	0.00321935	3.63255e-05	5.10401e-05	0.000162727	5.55317e-05	0.00415411	0.00349839
cg14071503	19	TBC1D17	TBC1D17;TBC1D17	Body;Body	Island	2.47716e-05	0.0404007	1	85.5485	3.75194	82.9844	4.29349	Higher	1.67141e-05	3.54537e-05	3.21512e-05	9.35563e-05	2.30386e-05	1.56593e-05	2.64843e-05	4.34016e-05	4.35104e-05	9.96472e-05	0.000180167	6.89e-05
cg05279387	22	AIFM3	AIFM3;AIFM3;AIFM3;AIFM3	5'UTR;5'UTR;TSS200;TSS200	S_Shore	2.48791e-05	0.0404305	1	78.8845	2.34978	79.7313	2.37943	Lower	2.16207e-05	2.03286e-05	1.94815e-05	1.99681e-05	0.000182885	0.0013848	2.9433e-05	3.41942e-05	3.45141e-05	4.5119e-05	0.000371935	0.00162075
cg02617312	5	CDH10	CDH10	TSS200		2.49728e-05	0.0404378	1	4.37915	0.51885	4.15143	0.528027	Higher	2.48306e-05	5.35313e-05	3.15526e-05	5.63317e-05	0.00151487	0.000506364	3.11232e-05	5.59625e-05	4.35104e-05	6.88313e-05	0.00179104	0.000714464
cg19498239	1	MEGF6	MEGF6	Body	N_Shelf	2.53468e-05	0.0408974	1	90.5683	1.63871	89.7116	2.0869	Higher	9.15828e-06	1.8846e-05	7.23864e-06	3.93471e-05	2.98762e-05	8.20331e-07	2.00673e-05	3.32953e-05	2.3258e-05	5.92563e-05	0.000197076	9.66063e-06
cg02152119	17	ORMDL3;RP11-387H17.4	ORMDL3	TSS200	Island	2.57246e-05	0.0411902	1	6.11821	0.649318	6.46977	0.67191	Lower	1.74346e-05	2.47045e-05	2.95376e-05	3.48712e-05	0.000113514	0.000148836	2.64843e-05	3.82094e-05	4.13439e-05	5.66894e-05	0.000301859	0.000266223
cg02298116	14				N_Shore	2.57742e-05	0.0411902	1	7.62107	1.24181	6.98417	1.22336	Higher	3.39326e-05	2.93694e-05	0.000110302	5.30762e-05	0.000122789	4.86332e-05	3.7458e-05	4.18304e-05	0.000114558	6.6699e-05	0.00030832	0.000134722
cg25005674	5	PPP2R2B	PPP2R2B;PPP2R2B;PPP2R2B;PPP2R2B;PPP2R2B;PPP2R2B;PPP2R2B	Body;Body;Body;Body;Body;Body;Body		2.58009e-05	0.0411902	1	90.5874	2.43787	89.0755	3.18899	Higher	2.21903e-05	3.05142e-05	3.73549e-05	4.83542e-05	8.08689e-05	9.95909e-06	2.95805e-05	4.18822e-05	4.81222e-05	6.41385e-05	0.000259986	5.00656e-05
cg00941900	14					2.60223e-05	0.0413981	1	92.3781	1.28319	91.5604	1.55342	Higher	1.68219e-05	5.10565e-05	1.71115e-05	2.73396e-05	0.000101556	2.08755e-05	2.64843e-05	5.4249e-05	3.27244e-05	5.0969e-05	0.000295015	8.0401e-05
cg07714565	15	UBE2Q2	UBE2Q2;UBE2Q2	TSS1500;TSS1500	Island	2.61972e-05	0.0415306	1	2.76943	0.379543	2.98018	0.36024	Lower	2.51241e-05	3.01495e-05	3.28662e-05	5.53701e-05	0.000113265	8.28224e-05	3.12924e-05	4.18822e-05	4.41399e-05	6.79502e-05	0.000301333	0.000187398
cg14212190	19	CD97	CD97;CD97;CD97	TSS200;TSS200;TSS200		2.6325e-05	0.0415877	1	11.452	4.35179	9.27418	2.8841	Higher	2.08377e-05	3.03149e-05	4.12035e-05	5.31365e-05	0.000146559	0.000161083	2.93374e-05	4.18822e-05	5.1262e-05	6.6699e-05	0.00033097	0.000281005
cg16252717	19	SIRT2;NFKBIB	SIRT2;SIRT2;NFKBIB;SIRT2;NFKBIB;SIRT2	5'UTR;1stExon;TSS1500;1stExon;TSS1500;5'UTR	Island	2.68732e-05	0.0421211	1	4.28801	0.483498	4.05135	0.372486	Higher	1.95315e-05	3.74073e-05	1.012e-05	3.65895e-05	0.000202578	9.04587e-05	2.79943e-05	4.45742e-05	2.5555e-05	5.72399e-05	0.000387452	0.000193855
cg13881452	6					2.6931e-05	0.0421211	1	95.0671	1.46376	95.4626	1.65212	Lower	3.48641e-05	3.90253e-05	5.95509e-05	5.38517e-05	0.00211856	0.00479596	3.77917e-05	4.46556e-05	6.72731e-05	6.67585e-05	0.00238659	0.00502667
cg16485682	18	GATA6;GATA6-AS1	GATA6;GATA6	5'UTR;1stExon	Island	2.69944e-05	0.0421211	1	2.58571	0.249804	2.46914	0.234208	Higher	2.82577e-05	3.51397e-05	2.00524e-05	5.37478e-05	0.000437158	0.000322493	3.30022e-05	4.31741e-05	3.49203e-05	6.67289e-05	0.000657248	0.000497024
cg13634966	8	ESCO2	ESCO2	3'UTR		2.70342e-05	0.0421211	1	78.7874	3.69213	80.0212	3.59744	Lower	4.03315e-05	3.80562e-05	9.13966e-05	2.70559e-05	0.0140298	0.00872391	4.24269e-05	4.45815e-05	9.66261e-05	5.0846e-05	0.0141126	0.00890905
cg05966923	16	CAC1H;RP11-616M22.3	CACNA1H;CACNA1H	Body;Body	S_Shelf	2.73151e-05	0.042413	1	92.8352	1.45609	91.8573	1.90602	Higher	4.42029e-05	2.23271e-05	0.000147151	1.74332e-05	3.48602e-05	1.27157e-06	4.56452e-05	3.61184e-05	0.000149781	4.42591e-05	0.000205037	1.34044e-05
cg16262559	4				S_Shore	2.74267e-05	0.042441	1	87.1056	2.22448	85.5734	3.32793	Higher	1.46078e-05	3.45759e-05	1.1234e-05	7.19555e-05	0.000182725	7.21294e-05	2.43762e-05	4.31362e-05	2.72413e-05	8.17006e-05	0.000371935	0.000174242
cg16645202	15	SLCO3A1	SLCO3A1;SLCO3A1	Body;Body	Island	2.75666e-05	0.0424569	1	7.50579	0.755471	7.95353	0.922968	Lower	1.86915e-05	3.48278e-05	2.35705e-05	6.24159e-05	0.000275638	0.000337817	2.71544e-05	4.31741e-05	3.75416e-05	7.32345e-05	0.00047823	0.000509704
cg08318726	12	TBX5	TBX5;TBX5;TBX5	TSS1500;5'UTR;5'UTR	N_Shore	2.76243e-05	0.0424569	1	5.89291	0.781446	5.53928	0.699604	Higher	2.95592e-05	3.93707e-05	3.18735e-05	5.67389e-05	0.000322786	6.23505e-05	3.39952e-05	4.49777e-05	4.35104e-05	6.8876e-05	0.000542179	0.000156542
cg26840889	7					2.7774e-05	0.0425427	1	84.5225	2.67949	83.5421	2.88063	Higher	2.46643e-05	3.2541e-05	2.85906e-05	0.000101147	0.000425385	0.00158831	3.11007e-05	4.24584e-05	4.12973e-05	0.000105743	0.000641767	0.00183874
cg20291363	1	NKAIN1	NKAIN1	TSS1500		2.79321e-05	0.0426237	1	85.7372	2.10015	84.5472	2.00216	Higher	1.69535e-05	3.01474e-05	2.91968e-05	3.98732e-05	0.000287628	0.000179108	2.64843e-05	4.18822e-05	4.13439e-05	5.9451e-05	0.000494466	0.000308142
cg07222863	8	BAALC-AS2;BAALC	C8orf56;BAALC;BAALC	TSS200;Body;Body	S_Shore	2.83477e-05	0.0426237	1	7.21033	0.995741	6.70361	0.883251	Higher	3.159e-05	3.29233e-05	5.65185e-05	5.18506e-05	0.000220213	6.2673e-05	3.57504e-05	4.26375e-05	6.43051e-05	6.65811e-05	0.000411542	0.000156542
cg26240970	7					2.84048e-05	0.0426237	1	87.1896	2.62007	85.5522	3.31798	Higher	2.64471e-05	3.09869e-05	3.38824e-05	5.86725e-05	0.000153072	1.58585e-05	3.19668e-05	4.20961e-05	4.50011e-05	6.99601e-05	0.000334465	6.89e-05
cg09560096	2	BCS1L	BCS1L;BCS1L	Body;Body	S_Shelf	2.8437e-05	0.0426237	1	91.0685	2.16628	91.7042	2.26797	Lower	2.50185e-05	3.42094e-05	4.93915e-05	2.59705e-05	0.000633154	0.00425529	3.12706e-05	4.27782e-05	5.83818e-05	5.00203e-05	0.000862348	0.00449866
cg08464831	16	RP11-420N3.3				2.84487e-05	0.0426237	1	91.3714	1.52155	90.505	1.89077	Higher	3.74666e-05	3.98006e-05	0.000107359	6.27821e-05	5.0036e-05	3.30213e-06	3.99228e-05	4.52979e-05	0.000111742	7.32345e-05	0.000227412	2.46898e-05
cg13701615	5	CTD-2083E4.6;PDCD6	PDCD6	TSS200	Island	2.8531e-05	0.0426237	1	4.40482	0.401346	4.61051	0.402844	Lower	2.10185e-05	2.11231e-05	5.50196e-05	1.69047e-05	0.000882546	0.000567019	2.9369e-05	3.50741e-05	6.34098e-05	4.38299e-05	0.00113056	0.000768917
cg14385325	17	ST6GALC2;RP11-666A8.9	ST6GALNAC2	Body		2.85863e-05	0.0426237	1	36.1817	2.47224	34.8748	2.59707	Higher	3.48185e-05	2.61825e-05	3.65424e-05	3.03496e-05	0.000459139	7.90868e-05	3.77917e-05	3.97192e-05	4.76142e-05	5.261e-05	0.000683636	0.000183643
cg16879052	1	KCNJ9	KCNJ9	Body	Island	2.8596e-05	0.0426237	1	56.4555	4.65715	54.3341	4.70411	Higher	1.74127e-05	3.49383e-05	5.64015e-05	6.64857e-05	0.000406806	3.7553e-05	2.64843e-05	4.31741e-05	6.43051e-05	7.66064e-05	0.00062718	0.000112801
cg02052531	5					2.87101e-05	0.0426237	1	89.027	2.21589	89.9276	1.90036	Lower	1.06725e-05	3.23737e-05	1.39397e-05	6.47191e-05	0.0044344	0.00230266	2.15707e-05	4.24584e-05	2.96062e-05	7.49887e-05	0.00463978	0.002573
cg13048723	13	SMIM2-AS1				2.8767e-05	0.0426237	1	89.3569	1.95863	90.043	2.01324	Lower	3.48836e-05	4.21312e-05	6.60563e-05	9.00381e-05	0.00155608	0.0026685	3.77917e-05	4.73469e-05	7.26522e-05	9.60845e-05	0.001833	0.00293466
cg18959827	11	OR51E2	OR51E2	5'UTR		2.95709e-05	0.0436722	1	87.4544	2.22192	86.0681	2.51882	Higher	2.32076e-05	3.63183e-05	9.41873e-05	7.50747e-05	6.78674e-05	8.95469e-06	3.02421e-05	4.38143e-05	9.89231e-05	8.4711e-05	0.000242659	4.72821e-05
cg18815589	13	PCDH9	PCDH9;PCDH9	Body;Body		2.98292e-05	0.0438482	1	88.0239	1.8828	86.916	1.93477	Higher	1.26926e-05	3.26027e-05	3.68261e-05	8.99791e-05	0.000150645	2.25226e-05	2.30301e-05	4.24584e-05	4.784e-05	9.60845e-05	0.000333976	8.15625e-05
cg18640444	4	RP11-665G4.1				3.00011e-05	0.0438482	1	94.6489	1.28731	93.9475	1.65063	Higher	2.2412e-05	3.21064e-05	1.11558e-05	6.27085e-05	0.000513878	2.22779e-05	2.95805e-05	4.24584e-05	2.72413e-05	7.32345e-05	0.000729298	8.15625e-05
cg02042997	16	CLN3;APOBR	APOB48R	TSS200	N_Shelf	3.0166e-05	0.0438482	1	5.77181	0.780347	5.37095	0.709121	Higher	1.59894e-05	3.76494e-05	2.37347e-05	3.29219e-05	0.000148588	9.22295e-05	2.62511e-05	4.45815e-05	3.75416e-05	5.54182e-05	0.000333476	0.000195278
cg13601496	21	ADAMTS5	ADAMTS5	TSS200	Island	3.02033e-05	0.0438482	1	5.1582	0.571609	5.49201	0.756895	Lower	2.39569e-05	3.0503e-05	5.66562e-05	7.91159e-05	0.000473166	0.000886631	3.08339e-05	4.18822e-05	6.43051e-05	8.79147e-05	0.000700189	0.00112973
cg17301635	18	TGIF1	TGIF1;TGIF1;TGIF1;TGIF1;TGIF1;TGIF1;TGIF1	5'UTR;Body;Body;5'UTR;TSS200;Body;TSS200	Island	3.03238e-05	0.0438482	1	5.14809	0.565669	5.46022	0.675702	Lower	1.26789e-05	3.258e-05	2.36703e-05	1.54825e-05	0.000190637	0.000285109	2.30301e-05	4.24584e-05	3.75416e-05	4.31949e-05	0.000374042	0.00044583
cg27649348	5				N_Shore	3.05566e-05	0.0438482	1	26.7705	4.21413	28.0842	4.58896	Lower	2.71761e-05	5.75837e-05	1.94874e-05	8.5057e-05	0.00219672	0.00118585	3.25199e-05	5.9161e-05	3.45141e-05	9.21511e-05	0.00246925	0.00144254
cg26835417	1	IPO9	IPO9	3'UTR		3.07209e-05	0.0438482	1	95.3392	1.02562	95.8498	0.868413	Lower	2.36467e-05	3.08391e-05	2.71948e-05	2.31366e-05	0.000637783	0.000468583	3.0527e-05	4.19899e-05	4.02035e-05	4.73249e-05	0.000862906	0.000668642
cg09430738	3				S_Shelf	3.07582e-05	0.0438482	1	84.4274	2.26449	82.9242	2.68435	Higher	1.12003e-05	3.51911e-05	2.37887e-05	3.49268e-05	5.76431e-05	4.55072e-05	2.21902e-05	4.31741e-05	3.75423e-05	5.66894e-05	0.000239496	0.000129951
cg21009747	22	MYH9	MYH9	Body		3.07864e-05	0.0438482	1	94.3031	0.559021	94.5441	0.510351	Lower	2.90291e-05	3.76994e-05	8.97025e-05	6.27879e-05	0.001957	0.00178623	3.35091e-05	4.45815e-05	9.52589e-05	7.32345e-05	0.00223321	0.00203876
cg06322518	10	C10orf71	C10orf71;C10orf71	3'UTR;3'UTR	S_Shore	3.08516e-05	0.0438482	1	84.8684	2.99834	83.5955	3.66251	Higher	2.14988e-05	3.90423e-05	1.67796e-05	4.06644e-05	0.000169514	4.05793e-07	2.9417e-05	4.46556e-05	3.2699e-05	5.95364e-05	0.000353149	6.5685e-06
cg11652636	2	AC012358.4;CLHC1	C2orf63;C2orf63	5'UTR;5'UTR	Island	3.09625e-05	0.0438482	1	9.16201	4.64294	6.83742	2.76273	Higher	3.86453e-05	4.13362e-05	2.81485e-05	4.31013e-05	0.00016908	8.99847e-05	4.09787e-05	4.67245e-05	4.0745e-05	6.11794e-05	0.000353022	0.000193855
cg12544647	4	PCGF3	PCGF3	Body	S_Shore	3.1013e-05	0.0438482	1	94.2415	0.847154	94.6437	0.736082	Lower	2.60628e-05	3.35011e-05	3.92737e-05	4.95372e-05	0.000801841	0.000282617	3.18068e-05	4.27329e-05	4.95522e-05	6.48598e-05	0.00104343	0.00044583
cg09816471	16	SNN	SNN	TSS1500	Island	3.10162e-05	0.0438482	1	12.8396	2.28886	11.6824	1.80923	Higher	3.50865e-05	4.44362e-05	8.31585e-05	5.03095e-05	0.000134084	9.81319e-05	3.79e-05	4.93143e-05	8.88567e-05	6.52866e-05	0.000316881	0.00020433
cg14241045	9		CACNA1B	Body	S_Shore	3.10441e-05	0.0438482	1	74.1983	2.66714	75.4186	3.12622	Lower	2.13142e-05	3.8584e-05	1.36863e-05	1.81249e-05	0.000153212	0.000322988	2.93862e-05	4.45815e-05	2.95137e-05	4.45019e-05	0.000334465	0.000497024
cg17717926	12				N_Shelf	3.11849e-05	0.0439104	1	91.222	1.83149	92.1744	1.89901	Lower	2.08938e-05	3.33044e-05	4.24161e-05	5.6579e-05	6.62979e-05	6.13229e-05	2.93374e-05	4.26375e-05	5.24092e-05	6.8876e-05	0.0002397	0.000155607
cg20716119	16	CDH1	CDH1	Body	Island	3.17564e-05	0.0445766	1	8.74905	1.06677	8.33594	0.931437	Higher	3.06987e-05	7.33116e-05	6.41579e-05	8.07734e-05	0.0107817	0.00124812	3.48362e-05	7.42799e-05	7.13965e-05	8.87629e-05	0.0109456	0.00149603
cg19243533	1	CLDN19	CLDN19;CLDN19	1stExon;1stExon	S_Shore	3.20474e-05	0.0447406	1	91.6082	1.93141	91.9788	2.10877	Lower	2.18986e-05	2.97817e-05	3.12391e-05	0.000151473	0.0181082	0.0279789	2.9433e-05	4.18304e-05	4.34037e-05	0.000153841	0.0181483	0.0280745
cg08616111	19	NFIX	NFIX	Body	Island	3.20705e-05	0.0447406	1	93.9384	1.39821	94.3405	1.32951	Lower	2.47498e-05	3.80558e-05	9.31323e-05	4.50215e-05	0.0177661	0.00620808	3.11007e-05	4.45815e-05	9.80411e-05	6.22445e-05	0.0178952	0.00641416
cg12143784	7				S_Shore	3.22415e-05	0.0448411	1	43.2768	7.1469	39.514	6.39813	Higher	2.9722e-05	2.9483e-05	4.65126e-05	3.58047e-05	0.000366048	0.000114268	3.40069e-05	4.18304e-05	5.6008e-05	5.70092e-05	0.000588103	0.0002262
cg04395798	10	LINC00839;CCNYL2	LOC84856	Body	Island	3.24215e-05	0.0449535	1	12.6089	3.47066	14.8485	4.77653	Lower	4.7172e-05	3.72964e-05	1.20033e-05	4.72628e-05	0.000302348	0.000253728	4.82178e-05	4.45742e-05	2.80994e-05	6.31222e-05	0.000515511	0.000407481
cg22001496	8	C8orf34;RP11-664D7.4			Island	3.26079e-05	0.0449722	1	4.82956	0.660643	4.4779	0.572666	Higher	2.17489e-05	5.13339e-05	4.77599e-05	4.33142e-05	0.000189632	0.000146777	2.9433e-05	5.43092e-05	5.73904e-05	6.1234e-05	0.000374031	0.000265163
cg06979680	10	GRID1	GRID1	Body		3.26333e-05	0.0449722	1	92.7818	1.37029	93.336	1.44666	Lower	4.0837e-05	3.50579e-05	6.88705e-05	3.93821e-05	0.000498432	0.000443052	4.2716e-05	4.31741e-05	7.55096e-05	5.92563e-05	0.000716122	0.000637447
cg20074048	9	SECISBP2	SECISBP2	TSS1500	N_Shore	3.27842e-05	0.0450432	1	15.2609	2.0075	14.2442	1.74427	Higher	4.3377e-05	3.63313e-05	7.87808e-05	4.54232e-05	0.000387215	0.000251356	4.51885e-05	4.38143e-05	8.48789e-05	6.23428e-05	0.000613975	0.000406124
cg09141303	4	SLC9B2	NHEDC2	TSS200	S_Shore	3.31366e-05	0.0453899	1	72.9637	4.09997	74.6561	3.81367	Lower	2.60895e-05	4.57561e-05	4.27129e-05	7.80312e-05	0.00184622	0.00167735	3.18068e-05	5.0607e-05	5.26075e-05	8.72035e-05	0.00213374	0.00191927
cg15073624	19	ZNF114;CTC-453G23.8;CARD8			Island	3.35386e-05	0.0458021	1	5.27989	0.632857	5.61577	0.6858	Lower	2.45081e-05	4.80588e-05	3.78332e-05	3.71068e-05	0.000545644	0.000558695	3.11007e-05	5.1711e-05	4.84714e-05	5.76266e-05	0.000768899	0.000760805
cg23510153	10	ZNF248;RP11-162G10.5	ZNF248;ZNF248	5'UTR;1stExon	N_Shore	3.42372e-05	0.0466158	1	4.43731	0.564007	4.78567	0.739283	Lower	3.53602e-05	4.60711e-05	2.58711e-05	5.2042e-05	0.000115589	0.000228789	3.81153e-05	5.07159e-05	3.9208e-05	6.65811e-05	0.000305007	0.000377
cg10857345	X	RP6-191P20.5;TEX13B	TEX13B	TSS200		3.45793e-05	0.0469406	1	87.9415	3.88381	88.9806	3.49712	Lower	2.14389e-05	3.73721e-05	8.02098e-06	2.55758e-05	0.00106941	0.000933291	2.93862e-05	4.45742e-05	2.3258e-05	4.97559e-05	0.00132779	0.00117373
cg00205703	3	FAM131A;EIF2B5	FAM131A;FAM131A	5'UTR;TSS1500	N_Shore	3.5188e-05	0.0471961	1	37.7052	3.10432	39.3446	3.01977	Lower	2.11041e-05	3.82723e-05	2.13505e-05	7.95785e-05	4.03037e-05	0.000113411	2.93862e-05	4.45815e-05	3.58569e-05	8.82117e-05	0.000221027	0.000225402
cg01971322	X	TRMT2B-AS1			S_Shelf	3.52288e-05	0.0471961	1	68.6486	3.67747	66.4369	3.6803	Higher	2.80678e-05	5.29834e-05	5.97984e-05	4.65687e-05	0.000102455	4.28852e-06	3.30022e-05	5.56427e-05	6.72973e-05	6.30764e-05	0.000295015	2.9406e-05
cg00513100	3	LRIG1	LRIG1	Body		3.52579e-05	0.0471961	1	92.7618	1.74313	91.9652	1.99306	Higher	1.81615e-05	2.89043e-05	3.70618e-05	4.09516e-05	0.000165456	1.2998e-07	2.68397e-05	4.16468e-05	4.78997e-05	5.95364e-05	0.000348539	4.901e-06
cg13163218	6	C2;ZBTB12	ZBTB12	TSS1500	Island	3.53291e-05	0.0471961	1	6.50505	0.990448	6.01737	0.774876	Higher	4.74111e-05	4.8272e-05	8.04209e-05	0.00010439	0.000664402	0.000554771	4.82919e-05	5.1711e-05	8.63556e-05	0.000108584	0.000882205	0.000760805
cg21562836	X		MIR1256	Body	N_Shelf	3.54736e-05	0.0471961	1	74.8068	3.45011	76.2048	3.27366	Lower	6.08836e-05	3.11365e-05	2.46629e-05	5.33585e-05	0.000235593	0.00020949	6.10611e-05	4.20961e-05	3.80078e-05	6.6699e-05	0.000426615	0.000353332
cg14272073	19	SEMA6B	SEMA6B	Body	N_Shelf	3.54818e-05	0.0471961	1	96.0612	0.827637	96.3896	0.68522	Lower	2.70944e-05	4.45213e-05	1.84816e-05	6.34624e-05	0.00580305	0.00259065	3.25028e-05	4.93143e-05	3.43735e-05	7.38236e-05	0.00594223	0.00286343
cg10694781	7	PLX4	PLXNA4;PLXNA4;PLXNA4	5'UTR;5'UTR;5'UTR	N_Shore	3.54962e-05	0.0471961	1	4.71332	0.699854	4.33482	0.68438	Higher	3.32373e-05	5.46084e-05	0.000149214	4.41345e-05	2.99471e-05	4.72307e-05	3.68997e-05	5.65393e-05	0.00015141	6.15875e-05	0.000197076	0.00013181
cg03222257	8	LSM1;BAG4	LSM1;BAG4	TSS1500;1stExon	Island	3.56136e-05	0.0472137	1	3.70004	0.4028	3.4625	0.456326	Higher	1.45664e-05	2.9669e-05	1.2959e-05	3.8633e-05	0.000256563	0.000143759	2.43762e-05	4.18304e-05	2.91018e-05	5.9057e-05	0.000456447	0.000263534
cg20901426	20	OGFR	OGFR	Body	Island	3.584e-05	0.0473754	1	72.5938	11.2795	77.6579	8.81576	Lower	3.72937e-05	8.65199e-05	3.82921e-05	9.4435e-05	0.00157421	0.00107276	3.98217e-05	8.69589e-05	4.87807e-05	9.99758e-05	0.001839	0.00132259
cg04000940	11	MADD	MADD;MADD;MADD;MADD;MADD;MADD;MADD;MADD;MADD;MADD	3'UTR;3'UTR;3'UTR;3'UTR;3'UTR;3'UTR;3'UTR;3'UTR;3'UTR;3'UTR		3.59949e-05	0.0474417	1	75.6674	2.19483	74.6263	2.4711	Higher	1.96823e-05	4.16599e-05	1.25797e-05	8.15087e-05	0.000883639	5.86378e-05	2.80688e-05	4.70366e-05	2.89646e-05	8.92731e-05	0.00113056	0.000154491
cg15499368	5				Island	3.68271e-05	0.0478552	1	6.54849	1.32041	5.9508	0.974764	Higher	4.18636e-05	3.41513e-05	2.94801e-05	0.000128581	0.000498198	0.000325981	4.37468e-05	4.27782e-05	4.13439e-05	0.000132856	0.000716122	0.000499602
cg17389519	10	PTF1A	PTF1A	TSS1500	Island	3.69104e-05	0.0478552	1	25.9119	2.67305	24.5267	2.36947	Higher	3.30082e-05	7.57946e-05	9.1528e-05	0.000344497	0.000157197	0.000109645	3.68938e-05	7.64048e-05	9.66261e-05	0.000344	0.000341225	0.000221765
cg22630605	4					3.69404e-05	0.0478552	1	88.3583	1.09431	87.6757	1.51527	Higher	7.22868e-05	4.38022e-05	2.86658e-05	2.90507e-05	0.000183156	2.50453e-05	7.23e-05	4.89356e-05	4.12973e-05	5.17789e-05	0.000371935	8.89151e-05
cg01361049	9				N_Shore	3.70634e-05	0.0478552	1	93.1956	1.61081	92.1637	1.85401	Higher	2.89241e-05	3.15291e-05	5.59816e-05	3.29053e-05	0.000110728	9.5803e-05	3.34957e-05	4.21704e-05	6.41702e-05	5.54182e-05	0.000300259	0.000201769
cg01906055	2	NCAPH	NCAPH	TSS1500	N_Shore	3.71104e-05	0.0478552	1	87.41	2.37811	88.3788	2.02263	Lower	4.58007e-05	5.17461e-05	4.82019e-05	5.34791e-05	0.00188661	0.000959049	4.7169e-05	5.45802e-05	5.7687e-05	6.6699e-05	0.00216659	0.00120114
cg15573058	2				N_Shore	3.71818e-05	0.0478552	1	96.5969	0.65286	96.8997	0.699524	Lower	4.65553e-05	3.07345e-05	1.8555e-05	1.22451e-05	0.000621502	0.000823015	4.77335e-05	4.19899e-05	3.43735e-05	3.91847e-05	0.000850444	0.00105895
cg26721993	5	CLPTM1L	CLPTM1L	1stExon	Island	3.72134e-05	0.0478552	1	2.89883	0.42102	2.69634	0.411073	Higher	3.259e-05	6.30102e-05	2.10468e-05	3.93848e-05	0.000641841	0.000528228	3.65544e-05	6.41855e-05	3.55022e-05	5.92563e-05	0.000865204	0.000739985
cg19389641	12	SCNN1A	SCNN1A;SCNN1A;SCNN1A	Body;Body;Body	Island	3.72581e-05	0.0478552	1	4.18778	0.508917	4.48428	0.585334	Lower	3.92547e-05	4.36486e-05	4.47671e-05	0.000100866	8.22779e-05	7.94174e-05	4.16053e-05	4.88888e-05	5.43074e-05	0.000105743	0.000262244	0.000183643
cg07188896	10					3.74213e-05	0.0478552	1	41.7596	3.61323	39.7443	4.03078	Higher	2.83243e-05	5.35711e-05	2.80685e-05	4.6041e-05	0.000258983	0.000103412	3.30022e-05	5.59625e-05	4.0745e-05	6.29386e-05	0.000456447	0.000212191
cg22841810	8	EBF2	EBF2	1stExon	Island	3.74467e-05	0.0478552	1	6.32762	0.815673	6.73967	0.913543	Lower	5.14175e-05	7.35629e-05	5.19275e-05	5.84484e-05	0.00104456	0.00123108	5.19483e-05	7.43851e-05	6.07649e-05	6.99601e-05	0.00130783	0.0014815
cg11612786	2	AC079135.1;GBX2			Island	3.75487e-05	0.0478552	1	7.48368	1.31649	6.82853	1.18342	Higher	3.41527e-05	4.74746e-05	0.000116387	0.000175878	0.000391973	3.13727e-05	3.75704e-05	5.14357e-05	0.000119814	0.000176466	0.000614133	0.000102937
cg17849194	4	UTP3	UTP3	TSS1500	Island	3.76557e-05	0.0478552	1	4.09872	0.380032	3.91148	0.41765	Higher	4.42308e-05	4.81805e-05	2.06661e-05	9.607e-05	9.12893e-05	0.000126776	4.56452e-05	5.1711e-05	3.54723e-05	0.000101172	0.000286073	0.000244281
cg09570031	7	RHEB	RHEB;RHEB	5'UTR;1stExon	Island	3.771e-05	0.0478552	1	6.24094	0.724882	6.58932	0.716943	Lower	4.36921e-05	4.91455e-05	6.58371e-05	8.0337e-05	0.000502772	0.000787951	4.53762e-05	5.22722e-05	7.26522e-05	8.84701e-05	0.000719118	0.00102088
cg24864402	20	TFAP2C	TFAP2C	TSS200	Island	3.77862e-05	0.0478552	1	11.0306	0.897467	11.4989	1.00973	Lower	5.32209e-05	5.7275e-05	0.000222605	9.46056e-05	0.000219434	0.000342803	5.36245e-05	5.9161e-05	0.000223593	9.99758e-05	0.000411542	0.000514091
cg27113059	18	LIPG	LIPG	TSS200	Island	3.84192e-05	0.0485213	1	3.89209	0.410017	4.1	0.463163	Lower	3.65477e-05	4.62679e-05	2.6371e-05	5.48828e-05	0.000994909	0.00123604	3.90777e-05	5.07159e-05	3.94952e-05	6.75555e-05	0.00125966	0.00148879
cg12392473	20	KCNB1	KCNB1	TSS200	Island	3.91522e-05	0.0488129	1	8.55912	0.947003	8.035	0.909683	Higher	5.0769e-05	3.39196e-05	0.000244245	3.45488e-05	0.000107506	1.56131e-05	5.14791e-05	4.27782e-05	0.000244	5.66039e-05	0.000300259	6.89e-05
cg18347040	19	ECSIT	ECSIT;ECSIT;ECSIT;ECSIT	5'UTR;TSS200;5'UTR;5'UTR	Island	3.92626e-05	0.0488129	1	4.68622	0.610741	4.36685	0.539554	Higher	3.04985e-05	3.84905e-05	5.68369e-05	2.32474e-05	0.000144403	8.15166e-05	3.47132e-05	4.45815e-05	6.43051e-05	4.73249e-05	0.000330146	0.000187351
cg14988869	5	GMCL1P1	GMCL1L	TSS1500	S_Shore	3.92818e-05	0.0488129	1	92.9655	1.48739	93.5294	1.65787	Lower	2.54255e-05	4.665e-05	3.54816e-05	4.65922e-05	0.00139965	0.00167778	3.15626e-05	5.08601e-05	4.66324e-05	6.30764e-05	0.00168179	0.00191927
cg00154557	6	DSE				3.93593e-05	0.0488129	1	91.3868	2.1285	90.4069	2.72674	Higher	2.46907e-05	3.6294e-05	2.77405e-05	2.48729e-05	4.18624e-05	7.14833e-09	3.11007e-05	4.38143e-05	4.04764e-05	4.86448e-05	0.000221027	6.73887e-07
cg00129196	2	AC079145.4;WDR35	WDR35;WDR35	TSS200;TSS200	Island	3.94914e-05	0.0488129	1	7.78639	0.856359	7.42204	0.790098	Higher	2.77131e-05	5.20176e-05	2.44071e-05	7.61392e-05	0.00379877	0.000604835	3.28072e-05	5.47444e-05	3.78545e-05	8.53311e-05	0.00407066	0.000805954
cg18762806	8				N_Shore	3.95986e-05	0.0488129	1	56.0383	4.57629	53.6666	4.7951	Higher	2.23515e-05	4.38738e-05	2.41651e-05	4.7246e-05	0.000193365	7.36218e-05	2.95805e-05	4.89356e-05	3.78545e-05	6.31222e-05	0.000376	0.000175615
cg03776082	2					3.96177e-05	0.0488129	1	83.7227	2.31577	82.445	2.34167	Higher	3.42766e-05	4.64932e-05	2.20056e-05	0.000137034	0.000111307	9.69928e-05	3.75714e-05	5.07882e-05	3.63772e-05	0.000140332	0.000300259	0.000203161
cg22994272	14	CTD-2134A5.4				3.97999e-05	0.0488129	1	16.8721	4.95124	14.9769	3.68377	Higher	3.65324e-05	5.74574e-05	2.0857e-05	8.9965e-05	0.0047258	0.00163336	3.90777e-05	5.9161e-05	3.55022e-05	9.60845e-05	0.00492654	0.00187351
cg02696253	6	AIM1	AIM1	Body	S_Shelf	4.00326e-05	0.0488129	1	25.503	4.35493	23.8366	4.43426	Higher	4.04677e-05	4.80996e-05	0.000131475	5.23622e-05	0.000225409	6.49459e-07	4.25194e-05	5.1711e-05	0.000134204	6.6699e-05	0.000414706	8.15577e-06
cg21183872	X	LONRF3	LONRF3;LONRF3	TSS1500;TSS1500	Island	4.00705e-05	0.0488129	1	29.6958	22.761	27.096	21.3672	Higher	2.69654e-05	5.39619e-05	1.20279e-05	4.237e-05	0.00416762	0.0033552	3.24857e-05	5.62253e-05	2.80994e-05	6.064e-05	0.00440427	0.00364
cg14169333	9				Island	4.00759e-05	0.0488129	1	5.00053	0.621845	5.28073	0.656015	Lower	4.84867e-05	5.45396e-05	0.000182674	6.74035e-05	0.00137299	0.00189468	4.92802e-05	5.65393e-05	0.000183976	7.69416e-05	0.00165103	0.00213973
cg05698911	6	DUSP22	DUSP22	Body		4.01456e-05	0.0488129	1	92.9538	1.75088	93.4164	1.98853	Lower	1.87601e-05	8.7547e-05	2.29194e-05	0.000134329	0.00110406	0.00420534	2.71954e-05	8.77315e-05	3.73736e-05	0.000137631	0.00136053	0.00445834
cg14583550	9	FANCC	FANCC	5'UTR	N_Shelf	4.01613e-05	0.0488129	1	77.9156	3.56285	76.0932	3.53333	Higher	3.98934e-05	9.63333e-05	0.000156956	0.00016387	0.000277987	7.97087e-06	4.21228e-05	9.63e-05	0.00015911	0.000166193	0.000479486	4.41866e-05
cg04596539	20	RP4-800J21.3			N_Shore	4.02087e-05	0.0488129	1	95.2728	1.20944	94.5826	1.5851	Higher	2.58577e-05	3.63444e-05	0.000113139	5.78222e-05	5.20931e-06	1.09162e-07	3.17673e-05	4.38143e-05	0.000117036	6.95435e-05	0.000132323	4.56589e-06
cg27029518	18	CNDP2	CNDP2;CNDP2	TSS1500;5'UTR	S_Shelf	4.0265e-05	0.0488129	1	27.8855	4.6438	27.1754	4.83996	Higher	2.74088e-05	5.92226e-05	6.32815e-05	5.75495e-05	ns	0.011534	3.25536e-05	6.064e-05	7.06038e-05	6.95435e-05	NA	0.0116546
cg09867669	17	SMG6	SMG6;SMG6	Body;Body	N_Shelf	4.06141e-05	0.0490153	1	95.1704	0.974166	95.5473	0.888026	Lower	3.38212e-05	4.87532e-05	0.000123693	7.14847e-05	0.00322509	0.00223181	3.74567e-05	5.20992e-05	0.000127727	8.13769e-05	0.00349994	0.00250958
cg05003666	11	TUB	TUB;TUB	TSS200;Body	Island	4.07427e-05	0.0490153	1	29.9717	2.54823	31.4031	2.75343	Lower	5.58518e-05	4.62744e-05	8.15012e-05	5.77219e-05	0.000162272	0.000222949	5.61966e-05	5.07159e-05	8.72884e-05	6.95435e-05	0.000346091	0.000370357
cg03725404	4	SLC2A9	SLC2A9;SLC2A9	Body;Body		4.07563e-05	0.0490153	1	57.4731	3.68428	58.6576	3.71896	Lower	2.84071e-05	3.41027e-05	3.90761e-05	5.35307e-05	0.00155316	0.00270824	3.30172e-05	4.27782e-05	4.94654e-05	6.6699e-05	0.00182696	0.00296997
cg17113147	17	NXN	NXN	Body		4.1166e-05	0.049377	1	91.7393	1.77912	92.2739	1.98434	Lower	2.95564e-05	6.20887e-05	6.12295e-05	0.000116193	0.00542571	0.00691793	3.39952e-05	6.34391e-05	6.84641e-05	0.00012012	0.00559364	0.00708924
cg17519101	15	ACSBG1	ACSBG1	1stExon		4.17263e-05	0.0499171	1	74.5529	2.86624	75.3986	2.93453	Lower	2.22769e-05	6.40883e-05	1.93143e-05	0.000165065	0.00508813	0.00346494	2.95805e-05	6.51311e-05	3.45141e-05	0.00016676	0.00527229	0.00372691
* p and q-values are generated using the Houseman reference-free method (Houseman EA, Molitor J, Marsit CJ. Reference-free cell mixture adjustments in analysis of DNA methylation data. Bioinformatics. 2014;30(10):1431-9.)
† p-values are generated using the Houseman reference-free method with the following covariates; maternal age, maternal BMI, gestational weight gain, smoking, gestational age, offspring sex
‡ p-values are generated using the Houseman reference-free method with the following covariates; maternal age, maternal BMI, gestational age, offspring sex
§ p-values are generated using the Houseman reference-free method with the following covariates; maternal age, maternal BMI, smoking, gestational age, offspring sex
|| p-values are generated using the Houseman reference-free method with the following covariates; gestational age, offspring sex
¶ p-values are generated using the reference-based method (Gervin K, Salas LA, Bakulski KM, van Zelm MC, Koestler DC, Wiencke JK, et al. Systematic evaluation and validation of reference and library selection methods for deconvolution of cord blood DNA methylation data. Clinical Epigenetics. 2019;11(1):125) with the following covariates; maternal age, maternal BMI, gestational weight gain, gestat…
# p-values are generated after further adjusting for the top 5 principal components (PCs) of the residuals with the following variables; maternal age, maternal BMI, gestational weight gain, gestational age, offspring sex, PC1, PC2, PC3, PC4, PC5
ns: not significant (p >0.05)

## Sheet: S2. Gene Ontology mapper
Supplemental Table S2. Results from GO Term mapping using GO Term Mapper. Settings; GO consortium and biological processes. A list of 370 genes found to have significantly different methylation sites in cord blood of the Lifestyle intervention vs. Control group (TOP-study) were used in this analysis
GO Term ID	Term	Annotations	Cluster frequency
GO:0009987	Cellular process	217	0.8251
GO:0050789	Regulation of biological process	160	0.6084
GO:0008152	Metabolic process	156	0.5932
GO:0043170	Macromolecule metabolic process	130	0.4943
GO:0050896	Response to stimulus	125	0.4753
GO:0032501	Multicellular organismal process	112	0.4259
GO:0009058	Biosynthetic process	92	0.3498
GO:0007154	Cell communication	90	0.3422
GO:0006139	Nucleobase, nucleoside, nucleotide and nucleic acid metabolic process	86	0.327
GO:0007275	Multicellular organismal development	84	0.3194
GO:0006810	Transport	74	0.2814
GO:0030154	Cell differentiation	64	0.2433
GO:0009056	Catabolic process	40	0.1521
GO:0051704	Multi-organism process	38	0.1445
GO:0008219	Cell death	36	0.1369
GO:0006928	Cellular component movement	31	0.1179
GO:0046903	Secretion	23	0.0875
GO:0007610	Behavior	10	0.038
GO:0043062	Extracellular structure organization	10	0.038
GO:0006944	Cellular membrane fusion	0	0
GO:0006519	Cellular amino acid and derivative metabolic process	0	0
GO:0009405	Pathogenesis	0	0

## Sheet: S3. Gene Ontology analysis
Supplemental Table S3. Results from Gene Ontology analysis on methylation sites found to be significantly different in cord blood of the Lifestyle intervention vs. Control group (TOP-study), using the MissMethyl package (p<0.01) and REViGO
Gene Ontology (GO) analysis									REViGO
GO Term ID	GO Term description	Genes in GO term	Number of differently methylated genes	Differently methylated genes	Differently methylated sites	p-value	-log10 p-value	FDR	Frequency	Uniqueness	Dispensability	Eliminated
GO:0014855	Striated muscle cell proliferation	80	7	SIX5, FGF2, TENM4, GATA6, MEIS1, MAPK1, TBX5	cg07342080, cg14887335, cg03599147, cg16485682, cg14836490, cg10080401, cg08318726	0.000659591	3.18073	1	0.00323	0.777	0.008	0
GO:0045956	Positive regulation of calcium ion-dependent exocytosis	25	4	SYT9, KCNB1, ARF1, CACNA1H	cg18509490, cg12392473, cg21142743, cg05966923	0.00158577	2.79976	1	0.00121	0.826	0.11	0
GO:0010032	Meiotic chromosome condensation	6	2	NCAPD3, NCAPH	cg22815766, cg01906055	0.00212124	2.67341	1	0.00035	0.831	0.399	0
GO:0007076	Mitotic chromosome condensation	17	3	AKAP8, NCAPD3, NCAPH	cg00772840, cg22815766, cg01906055	0.00234207	2.6304	1	0.00081	0.828	0.829	1
GO:0070542	Response to fatty acid	86	6	AKAP8, ACSL1, GNB1, OR51E2, DGAT2, AANAT	cg00772840, cg27571769, cg01821754, cg18959827, cg04084597, cg26142132	0.00242111	2.61599	1	0.00456	0.823	0.058	0
GO:0034695	Response to prostaglandin E	23	3	AKAP8, AANAT, GNB1	cg00772840, cg26142132, cg01821754	0.00765263	2.11619	1	0.00138	0.816	0.728	1
GO:0034201	Response to oleic acid	6	2	ACSL1, DGAT2	cg27571769, cg04084597	0.00581095	2.23575	1	0.00029	0.824	0.578	1
GO:0071071	Regulation of phospholipid biosynthetic process	19	3	AGAP2, HTR2A, CAPN2	cg24217894, cg07075299, cg22697825	0.00463686	2.33378	1	0.00081	0.795	0.21	0
GO:0010513	Positive regulation of phosphatidylinositol biosynthetic process	6	2	AGAP2, HTR2A	cg24217894, cg07075299	0.00423656	2.37299	1	0.00023	0.767	0.893	1
GO:0071073	Positive regulation of phospholipid biosynthetic process	12	3	AGAP2, HTR2A, CAPN2	cg24217894, cg07075299, cg22697825	0.000932362	3.03042	1	0.00052	0.762	0.758	1
GO:0090230	Regulation of centromere complex assembly	6	2	SENP6, RB1	cg01950844, cg00619497	0.00565147	2.24784	1	0.00029	0.842	0.225	0
GO:0016578	Histone deubiquitination	23	3	USP7, TRRAP, SART3	cg02322140, cg24968176, cg27394563	0.00578486	2.23771	1	0.00127	0.896	0	0
GO:0035881	Amacrine cell differentiation	8	2	PTF1A, POU4F2	cg17389519, cg19134568	0.00773877	2.11133	1	0.00046	0.754	0.156	0
GO:0061074	Regulation of neural retina development	6	2	POU4F2, PTF1A	cg19134568, cg17389519	0.00647913	2.18848	1	0.00035	0.72	0.728	1
GO:0035336	Long-chain fatty-acyl-coa metabolic process	25	3	ACSL1, ACSBG1, DGAT2	cg27571769, cg17519101, cg04084597	0.00867774	2.06159	1	0.00277	0.889	0.034	0
GO:0061179	Negative regulation of insulin secretion involved in cellular response to glucose stimulus	9	2	MAP4K4, KLF7	cg25248045, cg20302165	0.00870819	2.06007	1	0.00046	0.781	0.441	0
GO:0060612	Adipose tissue development	43	4	POU4F2, EBF2, DGAT2, KLF7	cg19134568, cg22841810, cg04084597, cg20302165	0.00894175	2.04858	1	0.00202	0.719	0.196	0
GO:1904178	Negative regulation of adipose tissue development	2	2	KLF7, POU4F2	cg20302165, cg19134568	0.000392737	3.4059	1	0.00118	0.684	0.652	1
GO:0032012	Regulation of ARF protein signal transduction	19	3	MAP4K4, IQSEC2, CYTH2	cg25248045, cg22288147, cg15545957	0.00904643	2.04352	1	0.00098	0.847	0.001	0
GO:0032011	ARF protein signal transduction	19	3	MAP4K4, IQSEC2, CYTH2	cg25248045, cg22288147, cg15545957	0.00904643	2.04352	1	0.00104	0.854	0.563	1
GO:0051891	Positive regulation of cardioblast differentiation	6	2	TBX5, GATA6	cg08318726, cg16485682	0.00931831	2.03066	1	0.00029	0.657	0.172	0
GO:0055021	Regulation of cardiac muscle tissue growth	77	5	MEIS1, TBX5, MAPK1, FGF2, GATA6	cg14836490, cg08318726, cg10080401, cg14887335, cg16485682	0.00879735	2.05565	1	0.00271	0.537	0.949	1
GO:0055023	Positive regulation of cardiac muscle tissue growth	48	4	TBX5, MAPK1, FGF2, GATA6	cg08318726, cg10080401, cg14887335, cg16485682	0.00778324	2.10884	1	0.00173	0.529	0.958	1
GO:0055017	Cardiac muscle tissue growth	104	6	MEIS1, TBX5, MAPK1, FGF2, GATA6, TENM4	cg14836490, cg08318726, cg10080401, cg14887335, cg16485682, cg03599147	0.00859007	2.066	1	0.00392	0.552	0.503	1
GO:0060038	Cardiac muscle cell proliferation	66	6	FGF2, TENM4, GATA6, MEIS1, MAPK1, TBX5	cg14887335, cg03599147, cg16485682, cg14836490, cg10080401, cg08318726	0.00117569	2.92971	1	0.0026	0.516	0.945	1
GO:0060043	Regulation of cardiac muscle cell proliferation	56	5	MEIS1, TBX5, MAPK1, FGF2, GATA6	cg14836490, cg08318726, cg10080401, cg14887335, cg16485682	0.00282328	2.54925	1	0.00202	0.5	0.956	1
GO:0060045	Positive regulation of cardiac muscle cell proliferation	38	4	FGF2, GATA6, MAPK1, TBX5	cg14887335, cg16485682, cg10080401, cg08318726	0.00392613	2.40603	1	0.00133	0.493	0.893	1
GO:1903988	Ferrous iron export	1	1	SLC40A1	cg19075346	0.00992108	2.00344	1	0.00012	0.878	0	0
GO:1903414	Iron cation export	1	1	SLC40A1	cg19075346	0.00992108	2.00344	1	0.00012	0.878	0.619	1
GO:0060345	Spleen trabecula formation	1	1	SLC40A1	cg19075346	0.00992108	2.00344	1	6e-05	0.811	0.006	0
Frequency = The proportion of this GO term in the underlying protein annotation database (UniProt). Higher frequency implies more general terms, lower – more specific ones.
Uniqueness = Measures whether the term is an outlier when compared semantically to the whole list. Calculated as 1- (average semantic similarity of a term to all other terms). More unique terms tend to be less dispensable.
Dispensability = The semantic similarity threshold at which the term was removed from the list and assigned to a cluster. Cluster representatives always have dispensability less than the user-specified ‘allowed similarity’ cutoff.
Data in light gray are terms removed by REViGO

## Sheet: S4. mQTLs in cord blood, GWAS
Supplemental Table S4. Results from overlap with the mQTL database in cord blood and with the significantly different methylation sites in cord blood of the Lifestyle intervention vs. Control group (TOP-study), combined with public GWAS data
mQTLs in cord blood														GWAS data
SNP	SNP Chr	SNP Pos	A1	A2	MAF	CpG site	CpG Chr	CpG Pos	beta	t stat	Effect Size	p-value	Trans	Disease trait	Reported Gene	Mapped Gene	Strongest SNP risk allele	Risk allele frequency	p-value	p-value_mlog	p-value text	OR or beta	95% CI	PUBMEDID
rs13129697	4	9926967	G	T	0.262	cg03725404	4	9998017	0.23874	5.89878	0.03651	5.48e-09	N	Biochemical measures	SLC2A9	SLC2A9	rs13129697-C	0.25	1e-09	9	(uric acid)	0.29	[0.21-0.37] umol/l decrease	19260141
rs4144027	14	104357638	C	T	0.423	cg22994272	14	104346241	-0.31393	-7.23305	0.00397	1.14e-12	N	Blood metabolite levels	ASPG	AL132712.2 - ATP5MPL	rs4144027-T	0.6	1e-11	11	(asparagine)	0.012	[0.0081-0.0159] unit increase	24816252
rs8044657	16	58022625	A	G	0.088	cg00491255	16	58019984	0.57586	7.5026	0.04619	1.73e-13	N	Chronic obstructive pulmory disease	TEPP	TEPP - ZNF319	rs8044657-G	0.9	1e-08	8		1.11	[1.07-1.15]	30804561
rs9677476	2	232126290	G	A	0.282	cg07929768	2	232055508	0.6824	15.2329	0.03426	5.49e-46	N	Food antigen IgG levels	ARMC9	ARMC9	rs9677476-G	0.274	1e-06	6	(BSA-a)	0.21	[NR] unit increase	24962563
rs9677476	2	232126290	G	A	0.282	cg27665808	2	232055229	0.61841	13.3526	0.07761	1e-36	N	Food antigen IgG levels	ARMC9	ARMC9	rs9677476-G	0.274	1e-06	6	(BSA-a)	0.21	[NR] unit increase	24962563
rs4475146	4	9946656	A	C	0.214	cg03725404	4	9998017	0.241	5.46279	0.02215	6.33e-08	N	Gout	SLC2A9	SLC2A9	rs4475146-A	0.2237	4e-26	25.3979		0.4682	[0.38-0.55] unit decrease	23263486
rs734553	4	9923004	G	T	0.23	cg03725404	4	9998017	0.23208	5.40479	0.02542	8.66e-08	N	Gout	SLC2A9	SLC2A9	rs734553-T	0.79	2e-07	6.69897		1.39	[1.23-1.59]	21983786
rs7580717	2	232176541	A	G	0.324	cg07929768	2	232055508	0.46986	10.2059	0.02618	5.06e-23	N	Multiple myeloma	NR	ARMC9	rs7580717-G		5e-06	5.30103		1.131	[NR]	23955597
rs7580717	2	232176541	A	G	0.324	cg27665808	2	232055229	0.43527	9.30568	0.04737	1.36e-19	N	Multiple myeloma	NR	ARMC9	rs7580717-G		5e-06	5.30103		1.131	[NR]	23955597
rs9443189	6	76495882	G	A	0.139	cg01950844	6	76311363	0.3404	5.44971	0.00105	6.8e-08	N	Prostate cancer	MYO6	MYO6	rs9443189-G	0.14	4e-08	7.39794		1.08	[1.05-1.11]	25217961
rs733175	4	10050141	C	T	0.175	cg03725404	4	9998017	0.27183	5.74875	0.0291	1.3e-08	N	Psychosis and Alzheimer's disease	SLC2A9	SLC2A9	rs733175-?	0.18	5e-06	5.30103		1.37	[NR]	22005930
rs3775948	4	9995182	G	C	0.238	cg03725404	4	9998017	0.27802	6.6119	0.04069	7.1e-11	N	Rel function-related traits (urea)	SLC2A9	SLC2A9	rs3775948-C	0.59	2e-65	64.699		0.1786	[0.16-0.20] mg/dl increase	22797727
rs9373594	6	149834574	C	T	0.142	cg18145961	6	149866213	0.35548	5.75119	0.00508	1.28e-08	N	Rheumatoid arthritis	PPIL4	PPIL4	rs9373594-T	0.33	5e-08	7.30103	(East Asian)	1.11	[1.07-1.15]	24390342
rs9373594	6	149834574	C	T	0.142	cg18145961	6	149866213	0.35548	5.75119	0.00508	1.28e-08	N	Rheumatoid arthritis	PPIL4	PPIL4	rs9373594-T	0.63	3e-09	8.52288		1.09	[1.06-1.12]	24390342
rs9991278	4	10002665	T	C	0.2	cg03725404	4	9998017	0.25585	5.63099	0.03217	2.51e-08	N	Serum metabolite levels	SLC2A9	SLC2A9	rs9991278-?	NR	5e-21	20.301	(urate)	0.02992	[NR] unit decrease	23093944
rs7675964	4	9941434	T	C	0.27	cg03725404	4	9998017	0.25141	6.24102	0.03652	7.18e-10	N	Serum uric acid levels	SLC2A9	SLC2A9	rs7675964-?	NR	5e-17	16.301	(Conditioned on rs7678287)			30305239
rs7678287	4	10000501	A	G	0.2	cg03725404	4	9998017	0.25585	5.63099	0.03217	2.51e-08	N	Serum uric acid levels	SLC2A9	SLC2A9	rs7678287-A	NR	2e-42	41.699		0.47	[NR] unit decrease	30305239
rs734553	4	9923004	G	T	0.23	cg03725404	4	9998017	0.23208	5.40479	0.02542	8.66e-08	N	Serum uric acid levels	SLC2A9	SLC2A9	rs734553-T	0.79	1e-80	80		0.24	[0.22-0.27] s.d. increase	21983786
rs13129697	4	9926967	G	T	0.262	cg03725404	4	9998017	0.23874	5.89878	0.03651	5.48e-09	N	Urate levels	SLC2A9	SLC2A9	rs13129697-G	0.27	2e-242	241.699	(Urate)	22.21	[20.90-23.52] umol/l decrease	20884846
rs13129697	4	9926967	G	T	0.262	cg03725404	4	9998017	0.23874	5.89878	0.03651	5.48e-09	N	Urate levels	SLC2A9	SLC2A9	rs13129697-T	0.73	4e-13	12.3979	(Gout)	1.52	[1.35-1.69]	20884846
rs12498742	4	9944052	G	A	0.222	cg03725404	4	9998017	0.24415	5.6205	0.02548	2.66e-08	N	Urate levels	SLC2A9	SLC2A9	rs12498742-A	0.77	0	700		0.373	[0.36-0.38] mg/dl increase	23263486
rs6855911	4	9935910	G	A	0.239	cg03725404	4	9998017	0.23217	5.43628	0.02547	7.31e-08	N	Urate levels	GLUT9	SLC2A9	rs6855911-A	0.74	2e-16	15.699		0.32	[NR] mg/dl increase	17997608
rs737267	4	9934744	T	G	0.239	cg03725404	4	9998017	0.23217	5.43628	0.02547	7.31e-08	N	Urate levels	SLC2A9	SLC2A9	rs737267-C	0.31	3e-09	8.52288		0.88	[NR] uM decrease in uric acid [females only]	18327257
rs13129697	4	9926967	G	T	0.262	cg03725404	4	9998017	0.23874	5.89878	0.03651	5.48e-09	N	Urate levels in lean individuals	SLC2A9	SLC2A9	rs13129697-G	0.28	8e-150	149.097	(Women)	0.403	[0.37-0.43] kg/m2 decrease	25811787
rs13129697	4	9926967	G	T	0.262	cg03725404	4	9998017	0.23874	5.89878	0.03651	5.48e-09	N	Urate levels in obese individuals	SLC2A9	SLC2A9	rs13129697-G	0.28	3e-59	58.5229	(women)	0.376	[0.33-0.42] kg/m2 decrease	25811787
rs13129697	4	9926967	G	T	0.262	cg03725404	4	9998017	0.23874	5.89878	0.03651	5.48e-09	N	Urate levels in overweight individuals	SLC2A9	SLC2A9	rs13129697-G	0.28	3e-111	110.523	(women)	0.412	[0.38-0.45] kg/m2 decrease	25811787
rs3775948	4	9995182	G	C	0.238	cg03725404	4	9998017	0.27802	6.6119	0.04069	7.1e-11	N	Uric acid levels	SLC2A9	SLC2A9	rs3775948-G	0.34	1e-08	8		0.211	[0.14-0.28] unit decrease	21294900
rs13129697	4	9926967	G	T	0.262	cg03725404	4	9998017	0.23874	5.89878	0.03651	5.48e-09	N	Uric acid levels	WDR1, SLC2A9	SLC2A9	rs13129697-G	0.36	2e-19	18.699		28.99	[NR] umol/L decrease	22229870
rs734553	4	9923004	G	T	0.23	cg03725404	4	9998017	0.23208	5.40479	0.02542	8.66e-08	N	Uric acid levels	SLC2A9	SLC2A9	rs734553-T	0.77	1e-192	192	(women)	0.4	[0.371-0.423] mg/dl increase	19503597
rs734553	4	9923004	G	T	0.23	cg03725404	4	9998017	0.23208	5.40479	0.02542	8.66e-08	N	Uric acid levels	SLC2A9	SLC2A9	rs734553-T	0.77	1e-41	41	(men)	0.22	[0.188-0.252] mg/dl increase	19503597
rs7564129	2	231930682	G	C	0.315	cg07929768	2	232055508	0.55103	12.2147	0.02968	1.74e-31	N	White matter microstructure (mean diusivities)	NR	PSMD1	rs7564129-?		4e-08	7.39794	(Hippocampus )			31666681
rs7564129	2	231930682	G	C	0.315	cg27665808	2	232055229	0.49928	10.809	0.05578	1.89e-25	N	White matter microstructure (mean diusivities)	NR	PSMD1	rs7564129-?		4e-08	7.39794	(Hippocampus )			31666681
rs7248744	19	50385031	G	A	0.438	cg10751382	19	50391554	0.79903	22.9389	0.17896	3.98e-89	N
rs3745486	19	50383636	C	T	0.441	cg10751382	19	50391554	0.796	22.7831	0.17898	3.33e-88	N
rs7248498	19	50384882	G	A	0.441	cg10751382	19	50391554	0.796	22.7831	0.17898	3.33e-88	N
rs746738	19	50386340	C	T	0.441	cg10751382	19	50391554	0.796	22.7831	0.17898	3.33e-88	N
rs2305916	19	50391301	G	T	0.439	cg10751382	19	50391554	0.7969	22.7332	0.18015	6.57e-88	N
rs4802634	19	50377757	T	C	0.447	cg10751382	19	50391554	0.78438	22.2597	0.1757	4.1e-85	N
rs3810267	19	50379053	G	A	0.443	cg10751382	19	50391554	0.78423	22.1432	0.17518	1.99e-84	N
rs3760709	19	50371399	A	G	0.452	cg10751382	19	50391554	0.77565	22.098	0.17377	3.67e-84	N
rs58137534	19	50375446	G	C	0.438	cg10751382	19	50391554	0.77386	21.7338	0.17334	5.05e-82	N
rs8112830	19	50375447	G	A	0.438	cg10751382	19	50391554	0.77386	21.7338	0.17334	5.05e-82	N
rs2290774	19	50375035	C	T	0.438	cg10751382	19	50391554	0.77462	21.7248	0.17244	5.7e-82	N
rs3810268	19	50379193	T	C	0.422	cg10751382	19	50391554	0.75441	21.1341	0.17302	1.6e-78	N
rs8110265	19	50377835	A	G	0.422	cg10751382	19	50391554	0.75441	21.1341	0.17302	1.6e-78	N
rs11083985	19	50378143	C	T	0.421	cg10751382	19	50391554	0.75581	21.1063	0.17302	2.33e-78	N
rs2290775	19	50375242	T	C	0.421	cg10751382	19	50391554	0.75581	21.1063	0.17302	2.33e-78	N
rs731826	19	50380858	G	T	0.421	cg10751382	19	50391554	0.75581	21.1063	0.17302	2.33e-78	N
rs2305922	19	50370106	G	T	0.437	cg10751382	19	50391554	0.76055	21.0166	0.16965	7.73e-78	N
rs3739164	19	50370846	D	R	0.437	cg10751382	19	50391554	0.76055	21.0166	0.16965	7.73e-78	N
rs11673399	19	50396263	C	T	0.452	cg10751382	19	50391554	0.75349	21.0042	0.16949	9.12e-78	N
chr19:50370851	19	50370851	D	R	0.426	cg10751382	19	50391554	0.76221	20.8136	0.17142	1.16e-76	N
rs149634817	19	50368879	D	R	0.427	cg10751382	19	50391554	0.74179	20.1838	0.16842	5.01e-73	N
rs2257103	19	50370066	T	C	0.411	cg10751382	19	50391554	0.73089	19.9116	0.16828	1.82e-71	N
rs1290649	19	50368361	A	T	0.41	cg10751382	19	50391554	0.72948	19.7975	0.16846	8.18e-71	N
rs55748426	2	232054897	C	G	0.211	cg07929768	2	232055508	0.89056	19.6237	0.06466	8.01e-70	N
rs6749936	2	232055684	T	C	0.211	cg07929768	2	232055508	0.89056	19.6237	0.06466	8.01e-70	N
rs6761645	2	232055153	A	T	0.211	cg07929768	2	232055508	0.89056	19.6237	0.06466	8.01e-70	N
rs7565313	2	232054514	G	A	0.211	cg07929768	2	232055508	0.89056	19.6237	0.06466	8.01e-70	N
rs11373473	19	50398581	I	R	0.471	cg10751382	19	50391554	0.70644	19.3269	0.16437	3.88e-68	N
rs1290751	19	50398939	G	A	0.47	cg10751382	19	50391554	0.70695	19.262	0.16521	9.05e-68	N
rs7248744	19	50385031	G	A	0.438	cg14071503	19	50391752	0.73066	19.2041	0.0697	1.92e-67	N
rs3745486	19	50383636	C	T	0.441	cg14071503	19	50391752	0.72102	18.8253	0.06999	2.61e-65	N
rs7248498	19	50384882	G	A	0.441	cg14071503	19	50391752	0.72102	18.8253	0.06999	2.61e-65	N
rs746738	19	50386340	C	T	0.441	cg14071503	19	50391752	0.72102	18.8253	0.06999	2.61e-65	N
rs2305916	19	50391301	G	T	0.439	cg14071503	19	50391752	0.72091	18.7542	0.07034	6.55e-65	N
rs12470661	2	232060050	G	A	0.237	cg07929768	2	232055508	0.81491	18.5682	0.04635	7.19e-64	N
rs4802634	19	50377757	T	C	0.447	cg14071503	19	50391752	0.71366	18.5655	0.06916	7.45e-64	N
rs6753393	2	232061967	C	G	0.238	cg07929768	2	232055508	0.81402	18.5426	0.04631	9.99e-64	N
rs3810267	19	50379053	G	A	0.443	cg14071503	19	50391752	0.71399	18.4972	0.06842	1.79e-63	N
rs3760709	19	50371399	A	G	0.452	cg14071503	19	50391752	0.7051	18.4233	0.0691	4.62e-63	N
rs3810268	19	50379193	T	C	0.422	cg14071503	19	50391752	0.70317	18.3512	0.06695	1.16e-62	N
rs8110265	19	50377835	A	G	0.422	cg14071503	19	50391752	0.70317	18.3512	0.06695	1.16e-62	N
rs11083985	19	50378143	C	T	0.421	cg14071503	19	50391752	0.70505	18.3505	0.0664	1.17e-62	N
rs2290775	19	50375242	T	C	0.421	cg14071503	19	50391752	0.70505	18.3505	0.0664	1.17e-62	N
rs731826	19	50380858	G	T	0.421	cg14071503	19	50391752	0.70505	18.3505	0.0664	1.17e-62	N
rs58137534	19	50375446	G	C	0.438	cg14071503	19	50391752	0.70547	18.2284	0.06815	5.59e-62	N
rs8112830	19	50375447	G	A	0.438	cg14071503	19	50391752	0.70547	18.2284	0.06815	5.59e-62	N
rs10187005	2	232077948	T	C	0.24	cg07929768	2	232055508	0.80064	18.2118	0.04225	6.92e-62	N
rs10202295	2	232084411	G	T	0.24	cg07929768	2	232055508	0.80064	18.2118	0.04225	6.92e-62	N
rs11558174	2	232072912	C	T	0.24	cg07929768	2	232055508	0.80064	18.2118	0.04225	6.92e-62	N
rs12465438	2	232073106	A	G	0.24	cg07929768	2	232055508	0.80064	18.2118	0.04225	6.92e-62	N
rs12465477	2	232073282	A	G	0.24	cg07929768	2	232055508	0.80064	18.2118	0.04225	6.92e-62	N
rs12478335	2	232064967	A	C	0.24	cg07929768	2	232055508	0.80064	18.2118	0.04225	6.92e-62	N
rs12478520	2	232065307	A	G	0.24	cg07929768	2	232055508	0.80064	18.2118	0.04225	6.92e-62	N
rs12478898	2	232083528	G	A	0.24	cg07929768	2	232055508	0.80064	18.2118	0.04225	6.92e-62	N
rs13423632	2	232079116	C	T	0.24	cg07929768	2	232055508	0.80064	18.2118	0.04225	6.92e-62	N
rs138492581	2	232072796	D	R	0.24	cg07929768	2	232055508	0.80064	18.2118	0.04225	6.92e-62	N
rs1477470	2	232076724	C	A	0.24	cg07929768	2	232055508	0.80064	18.2118	0.04225	6.92e-62	N
rs16827863	2	232077670	C	T	0.24	cg07929768	2	232055508	0.80064	18.2118	0.04225	6.92e-62	N
rs2005013	2	232066874	A	G	0.24	cg07929768	2	232055508	0.80064	18.2118	0.04225	6.92e-62	N
rs2006780	2	232066704	G	T	0.24	cg07929768	2	232055508	0.80064	18.2118	0.04225	6.92e-62	N
rs28678038	2	232063997	T	A	0.24	cg07929768	2	232055508	0.80064	18.2118	0.04225	6.92e-62	N
rs3731775	2	232063578	A	G	0.24	cg07929768	2	232055508	0.80064	18.2118	0.04225	6.92e-62	N
rs4637098	2	232075528	T	C	0.24	cg07929768	2	232055508	0.80064	18.2118	0.04225	6.92e-62	N
rs5018532	2	232077075	G	A	0.24	cg07929768	2	232055508	0.80064	18.2118	0.04225	6.92e-62	N
rs58383275	2	232063946	C	T	0.24	cg07929768	2	232055508	0.80064	18.2118	0.04225	6.92e-62	N
rs62197323	2	232063714	G	A	0.24	cg07929768	2	232055508	0.80064	18.2118	0.04225	6.92e-62	N
rs62197333	2	232085049	C	G	0.24	cg07929768	2	232055508	0.80064	18.2118	0.04225	6.92e-62	N
rs732079	2	232074479	G	C	0.24	cg07929768	2	232055508	0.80064	18.2118	0.04225	6.92e-62	N
rs7571479	2	232068541	T	C	0.24	cg07929768	2	232055508	0.80064	18.2118	0.04225	6.92e-62	N
rs7598728	2	232086055	T	C	0.24	cg07929768	2	232055508	0.80064	18.2118	0.04225	6.92e-62	N
rs7601741	2	232062351	T	C	0.24	cg07929768	2	232055508	0.80064	18.2118	0.04225	6.92e-62	N
rs78839329	2	232065460	G	A	0.24	cg07929768	2	232055508	0.80064	18.2118	0.04225	6.92e-62	N
rs9750018	2	232085298	G	A	0.24	cg07929768	2	232055508	0.80064	18.2118	0.04225	6.92e-62	N
rs13431424	2	232060553	A	G	0.236	cg07929768	2	232055508	0.8037	18.1941	0.04625	8.66e-62	N
rs58067379	2	232088295	T	A	0.241	cg07929768	2	232055508	0.79521	18.1298	0.03814	1.97e-61	N
rs57199832	2	232069083	G	T	0.238	cg07929768	2	232055508	0.79751	18.1072	0.04225	2.62e-61	N
rs2290774	19	50375035	C	T	0.438	cg14071503	19	50391752	0.70092	18.0292	0.06847	7.08e-61	N
rs139337150	2	232082700	D	R	0.236	cg07929768	2	232055508	0.79842	17.9358	0.04214	2.31e-60	N
rs56094456	19	50388689	D	R	0.372	cg10751382	19	50391554	0.69206	17.681	0.17016	5.81e-59	N
rs10181630	2	232091757	T	C	0.236	cg07929768	2	232055508	0.78297	17.5335	0.04213	3.72e-58	N
rs16827879	2	232092301	T	C	0.236	cg07929768	2	232055508	0.78297	17.5335	0.04213	3.72e-58	N
rs2305922	19	50370106	G	T	0.437	cg14071503	19	50391752	0.68709	17.469	0.06713	8.37e-58	N
rs3739164	19	50370846	D	R	0.437	cg14071503	19	50391752	0.68709	17.469	0.06713	8.37e-58	N
chr19:50370851	19	50370851	D	R	0.426	cg14071503	19	50391752	0.69211	17.4422	0.06742	1.17e-57	N
rs2257103	19	50370066	T	C	0.411	cg14071503	19	50391752	0.67767	17.2516	0.0654	1.27e-56	N
rs11673399	19	50396263	C	T	0.452	cg14071503	19	50391752	0.67253	17.169	0.06442	3.55e-56	N
rs6738687	2	232053167	A	G	0.252	cg07929768	2	232055508	0.77482	17.165	0.04937	3.74e-56	N
rs1290649	19	50368361	A	T	0.41	cg14071503	19	50391752	0.67637	17.1611	0.065	3.92e-56	N
rs6731682	2	232106245	C	G	0.239	cg07929768	2	232055508	0.76927	17.128	0.04213	5.93e-56	N
rs7573577	2	232104079	T	C	0.239	cg07929768	2	232055508	0.76927	17.128	0.04213	5.93e-56	N
rs9973675	2	232095484	A	G	0.239	cg07929768	2	232055508	0.76927	17.128	0.04213	5.93e-56	N
rs6708809	2	232112730	C	A	0.24	cg07929768	2	232055508	0.76797	17.0909	0.04209	9.4e-56	N
rs7562116	2	232108246	G	A	0.241	cg07929768	2	232055508	0.76487	17.0849	0.03802	1.01e-55	N
rs149634817	19	50368879	D	R	0.427	cg14071503	19	50391752	0.67525	17.0273	0.06391	2.07e-55	N
rs10181602	2	232121642	C	G	0.24	cg07929768	2	232055508	0.76517	17.0077	0.04206	2.64e-55	N
rs13408391	2	232124127	T	G	0.24	cg07929768	2	232055508	0.76517	17.0077	0.04206	2.64e-55	N
rs1973016	2	232117513	G	C	0.24	cg07929768	2	232055508	0.76517	17.0077	0.04206	2.64e-55	N
rs60240472	2	232131217	G	A	0.24	cg07929768	2	232055508	0.76517	17.0077	0.04206	2.64e-55	N
rs1290751	19	50398939	G	A	0.47	cg14071503	19	50391752	0.64858	16.4956	0.06227	1.45e-52	N
rs11373473	19	50398581	I	R	0.471	cg14071503	19	50391752	0.64458	16.4242	0.06201	3.46e-52	N
rs55748426	2	232054897	C	G	0.211	cg27665808	2	232055229	0.78501	16.2806	0.08695	1.99e-51	N
rs6749936	2	232055684	T	C	0.211	cg27665808	2	232055229	0.78501	16.2806	0.08695	1.99e-51	N
rs6761645	2	232055153	A	T	0.211	cg27665808	2	232055229	0.78501	16.2806	0.08695	1.99e-51	N
rs7565313	2	232054514	G	A	0.211	cg27665808	2	232055229	0.78501	16.2806	0.08695	1.99e-51	N
rs1290646	19	50363175	A	G	0.493	cg10751382	19	50391554	-0.61008	-16.0838	0.14675	2.16e-50	N
rs62197317	2	232054467	C	T	0.178	cg07929768	2	232055508	0.83542	16.0652	0.06523	2.7e-50	N
rs921470	19	50343129	T	C	0.495	cg10751382	19	50391554	-0.60901	-16.0194	0.14607	4.7e-50	N
rs1290647	19	50366164	A	C	0.346	cg10751382	19	50391554	0.65405	15.9975	0.14619	6.12e-50	N
rs12621280	2	232132984	G	C	0.258	cg07929768	2	232055508	0.72193	15.9765	0.03803	7.88e-50	N
rs62197345	2	232126698	A	C	0.256	cg07929768	2	232055508	0.70799	15.8551	0.03795	3.39e-49	N
rs10187005	2	232077948	T	C	0.24	cg27665808	2	232055229	0.72555	15.7824	0.07944	8.1e-49	N
rs10202295	2	232084411	G	T	0.24	cg27665808	2	232055229	0.72555	15.7824	0.07944	8.1e-49	N
rs11558174	2	232072912	C	T	0.24	cg27665808	2	232055229	0.72555	15.7824	0.07944	8.1e-49	N
rs12465438	2	232073106	A	G	0.24	cg27665808	2	232055229	0.72555	15.7824	0.07944	8.1e-49	N
rs12465477	2	232073282	A	G	0.24	cg27665808	2	232055229	0.72555	15.7824	0.07944	8.1e-49	N
rs12478335	2	232064967	A	C	0.24	cg27665808	2	232055229	0.72555	15.7824	0.07944	8.1e-49	N
rs12478520	2	232065307	A	G	0.24	cg27665808	2	232055229	0.72555	15.7824	0.07944	8.1e-49	N
rs12478898	2	232083528	G	A	0.24	cg27665808	2	232055229	0.72555	15.7824	0.07944	8.1e-49	N
rs13423632	2	232079116	C	T	0.24	cg27665808	2	232055229	0.72555	15.7824	0.07944	8.1e-49	N
rs138492581	2	232072796	D	R	0.24	cg27665808	2	232055229	0.72555	15.7824	0.07944	8.1e-49	N
rs1477470	2	232076724	C	A	0.24	cg27665808	2	232055229	0.72555	15.7824	0.07944	8.1e-49	N
rs16827863	2	232077670	C	T	0.24	cg27665808	2	232055229	0.72555	15.7824	0.07944	8.1e-49	N
rs2005013	2	232066874	A	G	0.24	cg27665808	2	232055229	0.72555	15.7824	0.07944	8.1e-49	N
rs2006780	2	232066704	G	T	0.24	cg27665808	2	232055229	0.72555	15.7824	0.07944	8.1e-49	N
rs28678038	2	232063997	T	A	0.24	cg27665808	2	232055229	0.72555	15.7824	0.07944	8.1e-49	N
rs3731775	2	232063578	A	G	0.24	cg27665808	2	232055229	0.72555	15.7824	0.07944	8.1e-49	N
rs4637098	2	232075528	T	C	0.24	cg27665808	2	232055229	0.72555	15.7824	0.07944	8.1e-49	N
rs5018532	2	232077075	G	A	0.24	cg27665808	2	232055229	0.72555	15.7824	0.07944	8.1e-49	N
rs58383275	2	232063946	C	T	0.24	cg27665808	2	232055229	0.72555	15.7824	0.07944	8.1e-49	N
rs62197323	2	232063714	G	A	0.24	cg27665808	2	232055229	0.72555	15.7824	0.07944	8.1e-49	N
rs62197333	2	232085049	C	G	0.24	cg27665808	2	232055229	0.72555	15.7824	0.07944	8.1e-49	N
rs732079	2	232074479	G	C	0.24	cg27665808	2	232055229	0.72555	15.7824	0.07944	8.1e-49	N
rs7571479	2	232068541	T	C	0.24	cg27665808	2	232055229	0.72555	15.7824	0.07944	8.1e-49	N
rs7598728	2	232086055	T	C	0.24	cg27665808	2	232055229	0.72555	15.7824	0.07944	8.1e-49	N
rs7601741	2	232062351	T	C	0.24	cg27665808	2	232055229	0.72555	15.7824	0.07944	8.1e-49	N
rs78839329	2	232065460	G	A	0.24	cg27665808	2	232055229	0.72555	15.7824	0.07944	8.1e-49	N
rs9750018	2	232085298	G	A	0.24	cg27665808	2	232055229	0.72555	15.7824	0.07944	8.1e-49	N
rs57199832	2	232069083	G	T	0.238	cg27665808	2	232055229	0.72402	15.7359	0.07933	1.41e-48	N
rs6753393	2	232061967	C	G	0.238	cg27665808	2	232055229	0.7241	15.6563	0.07912	3.65e-48	N
rs12470661	2	232060050	G	A	0.237	cg27665808	2	232055229	0.7237	15.6422	0.07901	4.32e-48	N
rs58067379	2	232088295	T	A	0.241	cg27665808	2	232055229	0.7178	15.6352	0.07901	4.7e-48	N
rs13431424	2	232060553	A	G	0.236	cg27665808	2	232055229	0.71929	15.5107	0.07883	2.06e-47	N
rs139337150	2	232082700	D	R	0.236	cg27665808	2	232055229	0.72115	15.4933	0.08076	2.54e-47	N
rs9973370	2	232095587	G	A	0.28	cg07929768	2	232055508	0.68652	15.3634	0.03439	1.18e-46	N
rs10544278	2	232139717	D	R	0.221	cg07929768	2	232055508	0.72599	15.3568	0.04977	1.28e-46	N
rs7584535	2	232106857	T	C	0.28	cg07929768	2	232055508	0.68542	15.328	0.03437	1.79e-46	N
rs12470450	2	232113888	A	T	0.281	cg07929768	2	232055508	0.68461	15.301	0.03431	2.46e-46	N
rs1881484	2	232112450	G	C	0.281	cg07929768	2	232055508	0.68461	15.301	0.03431	2.46e-46	N
rs6437010	2	232113263	C	G	0.281	cg07929768	2	232055508	0.68461	15.301	0.03431	2.46e-46	N
rs6704770	2	232109816	G	T	0.281	cg07929768	2	232055508	0.68461	15.301	0.03431	2.46e-46	N
rs59823376	2	232138371	A	G	0.222	cg07929768	2	232055508	0.7205	15.2848	0.04748	2.98e-46	N
rs72985811	2	232137146	C	A	0.222	cg07929768	2	232055508	0.7205	15.2848	0.04748	2.98e-46	N
rs2368563	2	232058493	G	A	0.295	cg07929768	2	232055508	0.67255	15.2599	0.037	3.99e-46	N
rs62197322	2	232061520	G	A	0.295	cg07929768	2	232055508	0.67255	15.2599	0.037	3.99e-46	N
rs144549877	2	232059421	D	R	0.297	cg07929768	2	232055508	0.67103	15.2588	0.03723	4.05e-46	N
rs60664562	2	232060843	A	T	0.295	cg07929768	2	232055508	0.6722	15.2444	0.03705	4.79e-46	N
rs12621567	2	232118813	C	T	0.282	cg07929768	2	232055508	0.6824	15.2329	0.03426	5.49e-46	N
rs13415839	2	232126534	T	C	0.282	cg07929768	2	232055508	0.6824	15.2329	0.03426	5.49e-46	N
rs13428369	2	232125632	C	T	0.282	cg07929768	2	232055508	0.6824	15.2329	0.03426	5.49e-46	N
rs200139389	2	232127714	D	R	0.282	cg07929768	2	232055508	0.6824	15.2329	0.03426	5.49e-46	N
rs36036355	2	232127712	D	R	0.282	cg07929768	2	232055508	0.6824	15.2329	0.03426	5.49e-46	N
rs6711312	2	232122348	C	T	0.282	cg07929768	2	232055508	0.6824	15.2329	0.03426	5.49e-46	N
rs6724253	2	232121998	G	A	0.282	cg07929768	2	232055508	0.6824	15.2329	0.03426	5.49e-46	N
rs7598478	2	232115887	T	C	0.282	cg07929768	2	232055508	0.6824	15.2329	0.03426	5.49e-46	N
rs10181630	2	232091757	T	C	0.236	cg27665808	2	232055229	0.70809	15.1959	0.07854	8.47e-46	N
rs16827879	2	232092301	T	C	0.236	cg27665808	2	232055229	0.70809	15.1959	0.07854	8.47e-46	N
rs114684524	2	232047033	T	G	0.164	cg07929768	2	232055508	0.81182	15.038	0.06473	5.38e-45	N
rs199978190	2	232047034	D	R	0.164	cg07929768	2	232055508	0.81182	15.038	0.06473	5.38e-45	N
rs6706471	2	232047028	G	A	0.164	cg07929768	2	232055508	0.81182	15.038	0.06473	5.38e-45	N
rs6706474	2	232047035	G	A	0.164	cg07929768	2	232055508	0.81182	15.038	0.06473	5.38e-45	N
rs12467855	2	232045517	A	G	0.165	cg07929768	2	232055508	0.81022	15.0341	0.06473	5.63e-45	N
rs16827834	2	232045648	T	C	0.165	cg07929768	2	232055508	0.81022	15.0341	0.06473	5.63e-45	N
rs2887283	2	232043850	C	A	0.165	cg07929768	2	232055508	0.81022	15.0341	0.06473	5.63e-45	N
rs55998106	2	232049648	A	G	0.165	cg07929768	2	232055508	0.81022	15.0341	0.06473	5.63e-45	N
rs6727422	2	232045064	T	C	0.165	cg07929768	2	232055508	0.81022	15.0341	0.06473	5.63e-45	N
rs7585622	2	232047561	T	C	0.165	cg07929768	2	232055508	0.81022	15.0341	0.06473	5.63e-45	N
rs7588692	2	232048059	T	C	0.165	cg07929768	2	232055508	0.81022	15.0341	0.06473	5.63e-45	N
rs7592659	2	232049056	C	G	0.165	cg07929768	2	232055508	0.81022	15.0341	0.06473	5.63e-45	N
rs199722615	2	232047032	I	R	0.163	cg07929768	2	232055508	0.81043	14.9876	0.06471	9.68e-45	N
rs60596955	2	232138241	T	C	0.219	cg07929768	2	232055508	0.71762	14.9637	0.04734	1.28e-44	N
rs28690417	2	232064182	A	G	0.206	cg07929768	2	232055508	0.74538	14.9616	0.035	1.31e-44	N
rs56094456	19	50388689	D	R	0.372	cg14071503	19	50391752	0.62418	14.9128	0.06193	2.31e-44	N
rs55970645	2	232052494	A	G	0.292	cg07929768	2	232055508	0.66604	14.8925	0.037	2.93e-44	N
rs6731682	2	232106245	C	G	0.239	cg27665808	2	232055229	0.69473	14.8419	0.07868	5.26e-44	N
rs7573577	2	232104079	T	C	0.239	cg27665808	2	232055229	0.69473	14.8419	0.07868	5.26e-44	N
rs9973675	2	232095484	A	G	0.239	cg27665808	2	232055229	0.69473	14.8419	0.07868	5.26e-44	N
rs200958245	19	50391297	D	R	0.3	cg10751382	19	50391554	0.63347	14.835	0.153	5.7e-44	N
rs2305917	19	50391299	T	C	0.3	cg10751382	19	50391554	0.63347	14.835	0.153	5.7e-44	N
rs10181602	2	232121642	C	G	0.24	cg27665808	2	232055229	0.69403	14.8273	0.07868	6.23e-44	N
rs13408391	2	232124127	T	G	0.24	cg27665808	2	232055229	0.69403	14.8273	0.07868	6.23e-44	N
rs1973016	2	232117513	G	C	0.24	cg27665808	2	232055229	0.69403	14.8273	0.07868	6.23e-44	N
rs60240472	2	232131217	G	A	0.24	cg27665808	2	232055229	0.69403	14.8273	0.07868	6.23e-44	N
rs6708809	2	232112730	C	A	0.24	cg27665808	2	232055229	0.69355	14.812	0.07861	7.44e-44	N
rs7562116	2	232108246	G	A	0.241	cg27665808	2	232055229	0.68904	14.76	0.07811	1.36e-43	N
rs200818964	19	50400731	I	R	0.474	cg10751382	19	50391554	0.57656	14.7533	0.1457	1.47e-43	N
rs35443401	2	232050613	D	R	0.164	cg07929768	2	232055508	0.79844	14.7197	0.06471	2.16e-43	N
rs35527845	2	232050618	A	C	0.164	cg07929768	2	232055508	0.79844	14.7197	0.06471	2.16e-43	N
rs149733127	2	232051416	D	R	0.161	cg07929768	2	232055508	0.80754	14.6973	0.06451	2.8e-43	N
rs6730886	2	232051356	A	G	0.161	cg07929768	2	232055508	0.80754	14.6973	0.06451	2.8e-43	N
rs6730987	2	232051388	C	G	0.161	cg07929768	2	232055508	0.80754	14.6973	0.06451	2.8e-43	N
rs62197320	2	232060366	G	T	0.292	cg07929768	2	232055508	0.64948	14.6105	0.03499	7.6e-43	N
rs12621280	2	232132984	G	C	0.258	cg27665808	2	232055229	0.6775	14.5982	0.08029	8.76e-43	N
rs1964363	7	64957497	A	G	0.403	cg12143784	7	64541923	0.62749	14.5598	0.03006	1.36e-42	N
rs73136127	7	64971725	T	C	0.416	cg12143784	7	64541923	0.62494	14.5599	0.02987	1.36e-42	N
rs138381591	7	64550549	I	R	0.397	cg12143784	7	64541923	0.63301	14.5576	0.02995	1.4e-42	N
rs201010942	7	64550538	D	R	0.397	cg12143784	7	64541923	0.63301	14.5576	0.02995	1.4e-42	N
rs10949967	7	64562139	G	T	0.403	cg12143784	7	64541923	0.63117	14.5454	0.02967	1.6e-42	N
rs17782240	7	64566610	T	C	0.403	cg12143784	7	64541923	0.63117	14.5454	0.02967	1.6e-42	N
rs68108630	7	64568486	C	T	0.403	cg12143784	7	64541923	0.63117	14.5454	0.02967	1.6e-42	N
rs146271029	7	64970373	T	C	0.402	cg12143784	7	64541923	0.62808	14.5397	0.03015	1.71e-42	N
rs35021752	7	64953787	T	A	0.402	cg12143784	7	64541923	0.62808	14.5397	0.03015	1.71e-42	N
rs35070250	7	64944952	A	G	0.402	cg12143784	7	64541923	0.62808	14.5397	0.03015	1.71e-42	N
rs4386866	7	64953677	C	T	0.402	cg12143784	7	64541923	0.62808	14.5397	0.03015	1.71e-42	N
rs4717266	7	64964510	A	G	0.402	cg12143784	7	64541923	0.62808	14.5397	0.03015	1.71e-42	N
rs12533038	7	64520961	A	C	0.396	cg12143784	7	64541923	0.63055	14.5161	0.03031	2.24e-42	N
rs12463656	2	232036396	A	G	0.161	cg07929768	2	232055508	0.79229	14.5078	0.06465	2.47e-42	N
rs12468767	2	232036843	G	T	0.161	cg07929768	2	232055508	0.79229	14.5078	0.06465	2.47e-42	N
rs13394402	2	231968920	T	G	0.161	cg07929768	2	232055508	0.79229	14.5078	0.06465	2.47e-42	N
rs13402242	2	232029568	G	A	0.161	cg07929768	2	232055508	0.79229	14.5078	0.06465	2.47e-42	N
rs62193731	2	232006786	A	G	0.161	cg07929768	2	232055508	0.79229	14.5078	0.06465	2.47e-42	N
rs72983619	2	232004469	A	G	0.161	cg07929768	2	232055508	0.79229	14.5078	0.06465	2.47e-42	N
rs10949963	7	64521120	A	G	0.406	cg12143784	7	64541923	0.62439	14.4939	0.02999	2.89e-42	N
rs10949964	7	64525709	C	A	0.406	cg12143784	7	64541923	0.62439	14.4939	0.02999	2.89e-42	N
rs10949966	7	64547939	C	G	0.406	cg12143784	7	64541923	0.62439	14.4939	0.02999	2.89e-42	N
rs11763475	7	64520997	T	C	0.406	cg12143784	7	64541923	0.62439	14.4939	0.02999	2.89e-42	N
rs11764690	7	64516736	T	C	0.406	cg12143784	7	64541923	0.62439	14.4939	0.02999	2.89e-42	N
rs11771279	7	64516648	T	G	0.406	cg12143784	7	64541923	0.62439	14.4939	0.02999	2.89e-42	N
rs12530733	7	64547832	T	C	0.406	cg12143784	7	64541923	0.62439	14.4939	0.02999	2.89e-42	N
rs12535805	7	64545884	G	A	0.406	cg12143784	7	64541923	0.62439	14.4939	0.02999	2.89e-42	N
rs12537116	7	64519161	T	G	0.406	cg12143784	7	64541923	0.62439	14.4939	0.02999	2.89e-42	N
rs12537120	7	64519182	C	G	0.406	cg12143784	7	64541923	0.62439	14.4939	0.02999	2.89e-42	N
rs12540918	7	64537604	C	T	0.406	cg12143784	7	64541923	0.62439	14.4939	0.02999	2.89e-42	N
rs139456788	7	64528578	D	R	0.406	cg12143784	7	64541923	0.62439	14.4939	0.02999	2.89e-42	N
rs147708145	7	64542027	D	R	0.406	cg12143784	7	64541923	0.62439	14.4939	0.02999	2.89e-42	N
rs1830014	7	64529658	A	G	0.406	cg12143784	7	64541923	0.62439	14.4939	0.02999	2.89e-42	N
rs34079274	7	64522633	A	G	0.406	cg12143784	7	64541923	0.62439	14.4939	0.02999	2.89e-42	N
rs35794351	7	64529300	T	C	0.406	cg12143784	7	64541923	0.62439	14.4939	0.02999	2.89e-42	N
rs4302728	7	64541681	T	G	0.406	cg12143784	7	64541923	0.62439	14.4939	0.02999	2.89e-42	N
rs5001356	7	64535529	T	C	0.406	cg12143784	7	64541923	0.62439	14.4939	0.02999	2.89e-42	N
rs55778450	7	64550201	G	A	0.406	cg12143784	7	64541923	0.62439	14.4939	0.02999	2.89e-42	N
rs67529730	7	64537021	A	G	0.406	cg12143784	7	64541923	0.62439	14.4939	0.02999	2.89e-42	N
rs71562951	7	64539403	C	G	0.406	cg12143784	7	64541923	0.62439	14.4939	0.02999	2.89e-42	N
rs71562952	7	64539747	T	G	0.406	cg12143784	7	64541923	0.62439	14.4939	0.02999	2.89e-42	N
rs71562953	7	64541022	A	G	0.406	cg12143784	7	64541923	0.62439	14.4939	0.02999	2.89e-42	N
rs71567899	7	64522340	D	R	0.406	cg12143784	7	64541923	0.62439	14.4939	0.02999	2.89e-42	N
rs73141358	7	64540405	A	T	0.406	cg12143784	7	64541923	0.62439	14.4939	0.02999	2.89e-42	N
rs74710315	7	64542246	A	G	0.406	cg12143784	7	64541923	0.62439	14.4939	0.02999	2.89e-42	N
rs7787674	7	64527303	G	T	0.406	cg12143784	7	64541923	0.62439	14.4939	0.02999	2.89e-42	N
rs80222255	7	64542442	A	G	0.406	cg12143784	7	64541923	0.62439	14.4939	0.02999	2.89e-42	N
rs11764327	7	64757311	T	C	0.404	cg12143784	7	64541923	0.62151	14.4928	0.028	2.93e-42	N
rs149921087	7	64781159	D	R	0.406	cg12143784	7	64541923	0.62107	14.4841	0.02912	3.24e-42	N
rs75688459	7	64520959	A	C	0.396	cg12143784	7	64541923	0.6287	14.4768	0.03021	3.52e-42	N
rs6724181	2	232044654	A	G	0.162	cg07929768	2	232055508	0.7898	14.4667	0.06467	3.95e-42	N
rs13239089	7	64798258	C	G	0.406	cg12143784	7	64541923	0.62165	14.4491	0.02934	4.83e-42	N
rs1543851	7	64806272	G	A	0.406	cg12143784	7	64541923	0.62165	14.4491	0.02934	4.83e-42	N
rs6971506	7	64801851	C	T	0.406	cg12143784	7	64541923	0.62165	14.4491	0.02934	4.83e-42	N
rs140874864	7	64947302	A	G	0.405	cg12143784	7	64541923	0.62012	14.4358	0.02999	5.62e-42	N
rs12539070	7	64771069	C	T	0.406	cg12143784	7	64541923	0.61931	14.4317	0.02933	5.88e-42	N
rs6978330	7	64773722	T	A	0.406	cg12143784	7	64541923	0.61931	14.4317	0.02933	5.88e-42	N
rs6974876	7	64790768	A	G	0.406	cg12143784	7	64541923	0.62104	14.4312	0.02934	5.92e-42	N
rs71562961	7	64556845	G	A	0.403	cg12143784	7	64541923	0.62711	14.4265	0.02967	6.25e-42	N
rs73369146	7	64555578	A	G	0.403	cg12143784	7	64541923	0.62711	14.4265	0.02967	6.25e-42	N
rs116921265	7	64748188	A	T	0.402	cg12143784	7	64541923	0.62374	14.412	0.02779	7.37e-42	N
rs66513022	7	64748206	T	C	0.402	cg12143784	7	64541923	0.62374	14.412	0.02779	7.37e-42	N
rs7807177	7	64559025	T	C	0.404	cg12143784	7	64541923	0.62534	14.4116	0.02936	7.4e-42	N
rs12535182	7	64785827	G	A	0.406	cg12143784	7	64541923	0.61907	14.4087	0.02923	7.65e-42	N
rs12536316	7	64786318	C	T	0.406	cg12143784	7	64541923	0.61907	14.4087	0.02923	7.65e-42	N
rs12666743	7	64777342	A	G	0.406	cg12143784	7	64541923	0.61907	14.4087	0.02923	7.65e-42	N
rs12669746	7	64787725	A	G	0.406	cg12143784	7	64541923	0.61907	14.4087	0.02923	7.65e-42	N
rs199588397	7	64781597	D	R	0.406	cg12143784	7	64541923	0.61907	14.4087	0.02923	7.65e-42	N
rs34661443	7	64783439	D	R	0.406	cg12143784	7	64541923	0.61907	14.4087	0.02923	7.65e-42	N
rs35417167	7	64783432	T	C	0.406	cg12143784	7	64541923	0.61907	14.4087	0.02923	7.65e-42	N
rs3857677	7	64779759	G	A	0.406	cg12143784	7	64541923	0.61907	14.4087	0.02923	7.65e-42	N
rs4717247	7	64783235	A	T	0.406	cg12143784	7	64541923	0.61907	14.4087	0.02923	7.65e-42	N
rs6954158	7	64790669	A	G	0.406	cg12143784	7	64541923	0.61907	14.4087	0.02923	7.65e-42	N
rs6954951	7	64781711	C	A	0.406	cg12143784	7	64541923	0.61907	14.4087	0.02923	7.65e-42	N
rs6973096	7	64781660	A	C	0.406	cg12143784	7	64541923	0.61907	14.4087	0.02923	7.65e-42	N
rs6978350	7	64790406	C	T	0.406	cg12143784	7	64541923	0.61907	14.4087	0.02923	7.65e-42	N
rs55637820	2	231935918	T	C	0.163	cg07929768	2	232055508	0.77711	14.3789	0.05676	1.08e-41	N
rs78890542	2	231930135	A	T	0.163	cg07929768	2	232055508	0.77711	14.3789	0.05676	1.08e-41	N
rs10949982	7	64730642	A	G	0.404	cg12143784	7	64541923	0.61772	14.3647	0.0279	1.26e-41	N
rs10949983	7	64739240	C	T	0.404	cg12143784	7	64541923	0.61772	14.3647	0.0279	1.26e-41	N
rs11292630	7	64755122	D	R	0.404	cg12143784	7	64541923	0.61772	14.3647	0.0279	1.26e-41	N
rs11761184	7	64761479	A	G	0.404	cg12143784	7	64541923	0.61772	14.3647	0.0279	1.26e-41	N
rs11761772	7	64764772	C	T	0.404	cg12143784	7	64541923	0.61772	14.3647	0.0279	1.26e-41	N
rs11768131	7	64761455	T	C	0.404	cg12143784	7	64541923	0.61772	14.3647	0.0279	1.26e-41	N
rs11772543	7	64761611	C	T	0.404	cg12143784	7	64541923	0.61772	14.3647	0.0279	1.26e-41	N
rs11773286	7	64737116	T	C	0.404	cg12143784	7	64541923	0.61772	14.3647	0.0279	1.26e-41	N
rs12534769	7	64741666	A	G	0.404	cg12143784	7	64541923	0.61772	14.3647	0.0279	1.26e-41	N
rs13241147	7	64753269	C	G	0.404	cg12143784	7	64541923	0.61772	14.3647	0.0279	1.26e-41	N
rs200175053	7	64747726	D	R	0.404	cg12143784	7	64541923	0.61772	14.3647	0.0279	1.26e-41	N
rs34041561	7	64733781	I	R	0.404	cg12143784	7	64541923	0.61772	14.3647	0.0279	1.26e-41	N
rs34253157	7	64747729	D	R	0.404	cg12143784	7	64541923	0.61772	14.3647	0.0279	1.26e-41	N
rs4718208	7	64730706	A	G	0.404	cg12143784	7	64541923	0.61772	14.3647	0.0279	1.26e-41	N
rs4718210	7	64735666	T	G	0.404	cg12143784	7	64541923	0.61772	14.3647	0.0279	1.26e-41	N
rs4718211	7	64735671	T	A	0.404	cg12143784	7	64541923	0.61772	14.3647	0.0279	1.26e-41	N
rs55891307	7	64743364	T	C	0.404	cg12143784	7	64541923	0.61772	14.3647	0.0279	1.26e-41	N
rs564679	7	64751848	T	G	0.404	cg12143784	7	64541923	0.61772	14.3647	0.0279	1.26e-41	N
rs58643803	7	64737086	T	C	0.404	cg12143784	7	64541923	0.61772	14.3647	0.0279	1.26e-41	N
rs6460232	7	64745413	A	G	0.404	cg12143784	7	64541923	0.61772	14.3647	0.0279	1.26e-41	N
rs6944245	7	64746213	G	A	0.404	cg12143784	7	64541923	0.61772	14.3647	0.0279	1.26e-41	N
rs6948955	7	64752838	G	A	0.404	cg12143784	7	64541923	0.61772	14.3647	0.0279	1.26e-41	N
rs6958237	7	64745719	A	C	0.404	cg12143784	7	64541923	0.61772	14.3647	0.0279	1.26e-41	N
rs6963248	7	64746527	T	C	0.404	cg12143784	7	64541923	0.61772	14.3647	0.0279	1.26e-41	N
rs6964167	7	64747078	G	C	0.404	cg12143784	7	64541923	0.61772	14.3647	0.0279	1.26e-41	N
rs7796833	7	64734478	C	G	0.404	cg12143784	7	64541923	0.61772	14.3647	0.0279	1.26e-41	N
rs4718226	7	64775320	T	C	0.407	cg12143784	7	64541923	0.61798	14.3607	0.02912	1.32e-41	N
rs10949961	7	64501925	A	G	0.408	cg12143784	7	64541923	0.61975	14.3413	0.02997	1.65e-41	N
rs10949962	7	64506843	G	T	0.408	cg12143784	7	64541923	0.61975	14.3413	0.02997	1.65e-41	N
rs111493879	7	64514996	C	T	0.408	cg12143784	7	64541923	0.61975	14.3413	0.02997	1.65e-41	N
rs11762549	7	64505507	C	A	0.408	cg12143784	7	64541923	0.61975	14.3413	0.02997	1.65e-41	N
rs11767448	7	64512964	A	G	0.408	cg12143784	7	64541923	0.61975	14.3413	0.02997	1.65e-41	N
rs12537219	7	64502086	T	C	0.408	cg12143784	7	64541923	0.61975	14.3413	0.02997	1.65e-41	N
rs12665875	7	64494617	A	G	0.408	cg12143784	7	64541923	0.61975	14.3413	0.02997	1.65e-41	N
rs12666885	7	64483806	A	C	0.408	cg12143784	7	64541923	0.61975	14.3413	0.02997	1.65e-41	N
rs12669596	7	64483597	C	T	0.408	cg12143784	7	64541923	0.61975	14.3413	0.02997	1.65e-41	N
rs13231853	7	64503073	A	G	0.408	cg12143784	7	64541923	0.61975	14.3413	0.02997	1.65e-41	N
rs138653113	7	64493962	A	G	0.408	cg12143784	7	64541923	0.61975	14.3413	0.02997	1.65e-41	N
rs146438393	7	64493994	T	C	0.408	cg12143784	7	64541923	0.61975	14.3413	0.02997	1.65e-41	N
rs147431529	7	64486452	G	A	0.408	cg12143784	7	64541923	0.61975	14.3413	0.02997	1.65e-41	N
rs34344460	7	64493010	A	G	0.408	cg12143784	7	64541923	0.61975	14.3413	0.02997	1.65e-41	N
rs34346758	7	64508144	A	G	0.408	cg12143784	7	64541923	0.61975	14.3413	0.02997	1.65e-41	N
rs34438629	7	64498782	T	G	0.408	cg12143784	7	64541923	0.61975	14.3413	0.02997	1.65e-41	N
rs35578542	7	64494072	G	C	0.408	cg12143784	7	64541923	0.61975	14.3413	0.02997	1.65e-41	N
rs4451193	7	64486095	C	T	0.408	cg12143784	7	64541923	0.61975	14.3413	0.02997	1.65e-41	N
rs4717235	7	64510484	A	G	0.408	cg12143784	7	64541923	0.61975	14.3413	0.02997	1.65e-41	N
rs4717236	7	64513229	T	G	0.408	cg12143784	7	64541923	0.61975	14.3413	0.02997	1.65e-41	N
rs4717238	7	64513509	A	G	0.408	cg12143784	7	64541923	0.61975	14.3413	0.02997	1.65e-41	N
rs56009162	7	64496080	C	T	0.408	cg12143784	7	64541923	0.61975	14.3413	0.02997	1.65e-41	N
rs6959094	7	64511256	G	A	0.408	cg12143784	7	64541923	0.61975	14.3413	0.02997	1.65e-41	N
rs73141327	7	64491311	A	G	0.408	cg12143784	7	64541923	0.61975	14.3413	0.02997	1.65e-41	N
rs77183524	7	64512039	A	T	0.408	cg12143784	7	64541923	0.61975	14.3413	0.02997	1.65e-41	N
rs12471957	2	231993738	T	G	0.16	cg07929768	2	232055508	0.78645	14.3383	0.06463	1.71e-41	N
rs17440378	2	231979355	T	C	0.16	cg07929768	2	232055508	0.78645	14.3383	0.06463	1.71e-41	N
rs12469096	2	231921586	C	G	0.162	cg07929768	2	232055508	0.77588	14.3339	0.05675	1.79e-41	N
rs6738687	2	232053167	A	G	0.252	cg27665808	2	232055229	0.67962	14.3279	0.08056	1.92e-41	N
rs3739162	19	50371093	D	R	0.302	cg10751382	19	50391554	0.61891	14.3239	0.146	2.01e-41	N
esv2662632	7	64413376	D	R	0.408	cg12143784	7	64541923	0.62019	14.3179	0.03006	2.15e-41	N
rs1060383	7	64434856	A	C	0.408	cg12143784	7	64541923	0.62019	14.3179	0.03006	2.15e-41	N
rs10949951	7	64423726	C	T	0.408	cg12143784	7	64541923	0.62019	14.3179	0.03006	2.15e-41	N
rs10949952	7	64423777	T	C	0.408	cg12143784	7	64541923	0.62019	14.3179	0.03006	2.15e-41	N
rs10949955	7	64437648	A	G	0.408	cg12143784	7	64541923	0.62019	14.3179	0.03006	2.15e-41	N
rs10949959	7	64480165	C	G	0.407	cg12143784	7	64541923	0.62019	14.3179	0.03006	2.15e-41	N
rs11771269	7	64451558	A	G	0.407	cg12143784	7	64541923	0.62019	14.3179	0.03006	2.15e-41	N
rs11978852	7	64448371	A	G	0.407	cg12143784	7	64541923	0.62019	14.3179	0.03006	2.15e-41	N
rs12530729	7	64437121	G	C	0.408	cg12143784	7	64541923	0.62019	14.3179	0.03006	2.15e-41	N
rs12533804	7	64479658	A	G	0.407	cg12143784	7	64541923	0.62019	14.3179	0.03006	2.15e-41	N
rs12538650	7	64423812	C	T	0.408	cg12143784	7	64541923	0.62019	14.3179	0.03006	2.15e-41	N
rs12538992	7	64469928	A	T	0.407	cg12143784	7	64541923	0.62019	14.3179	0.03006	2.15e-41	N
rs12666841	7	64418558	T	C	0.408	cg12143784	7	64541923	0.62019	14.3179	0.03006	2.15e-41	N
rs12670240	7	64449816	G	T	0.407	cg12143784	7	64541923	0.62019	14.3179	0.03006	2.15e-41	N
rs13226629	7	64416847	G	A	0.408	cg12143784	7	64541923	0.62019	14.3179	0.03006	2.15e-41	N
rs13232826	7	64481211	C	A	0.407	cg12143784	7	64541923	0.62019	14.3179	0.03006	2.15e-41	N
rs13234869	7	64415535	C	G	0.408	cg12143784	7	64541923	0.62019	14.3179	0.03006	2.15e-41	N
rs13239892	7	64474629	T	C	0.407	cg12143784	7	64541923	0.62019	14.3179	0.03006	2.15e-41	N
rs13243536	7	64468904	A	G	0.407	cg12143784	7	64541923	0.62019	14.3179	0.03006	2.15e-41	N
rs13244300	7	64458764	A	G	0.407	cg12143784	7	64541923	0.62019	14.3179	0.03006	2.15e-41	N
rs13245077	7	64458820	T	C	0.407	cg12143784	7	64541923	0.62019	14.3179	0.03006	2.15e-41	N
rs13245081	7	64481170	C	G	0.407	cg12143784	7	64541923	0.62019	14.3179	0.03006	2.15e-41	N
rs150537157	7	64435377	D	R	0.408	cg12143784	7	64541923	0.62019	14.3179	0.03006	2.15e-41	N
rs1540833	7	64441551	C	T	0.408	cg12143784	7	64541923	0.62019	14.3179	0.03006	2.15e-41	N
rs1852026	7	64450711	T	A	0.407	cg12143784	7	64541923	0.62019	14.3179	0.03006	2.15e-41	N
rs1917393	7	64419612	A	G	0.408	cg12143784	7	64541923	0.62019	14.3179	0.03006	2.15e-41	N
rs2091224	7	64454022	A	G	0.407	cg12143784	7	64541923	0.62019	14.3179	0.03006	2.15e-41	N
rs2103146	7	64447612	G	A	0.407	cg12143784	7	64541923	0.62019	14.3179	0.03006	2.15e-41	N
rs35189858	7	64459715	A	G	0.407	cg12143784	7	64541923	0.62019	14.3179	0.03006	2.15e-41	N
rs35281840	7	64443922	C	G	0.407	cg12143784	7	64541923	0.62019	14.3179	0.03006	2.15e-41	N
rs35586133	7	64478057	A	G	0.407	cg12143784	7	64541923	0.62019	14.3179	0.03006	2.15e-41	N
rs3807068	7	64439613	G	T	0.408	cg12143784	7	64541923	0.62019	14.3179	0.03006	2.15e-41	N
rs3807069	7	64439701	T	C	0.408	cg12143784	7	64541923	0.62019	14.3179	0.03006	2.15e-41	N
rs3823471	7	64440328	A	G	0.408	cg12143784	7	64541923	0.62019	14.3179	0.03006	2.15e-41	N
rs4499978	7	64470973	G	A	0.407	cg12143784	7	64541923	0.62019	14.3179	0.03006	2.15e-41	N
rs4718177	7	64451656	A	G	0.407	cg12143784	7	64541923	0.62019	14.3179	0.03006	2.15e-41	N
rs4718178	7	64457608	A	G	0.407	cg12143784	7	64541923	0.62019	14.3179	0.03006	2.15e-41	N
rs55829525	7	64481505	D	R	0.407	cg12143784	7	64541923	0.62019	14.3179	0.03006	2.15e-41	N
rs6460216	7	64445644	G	A	0.407	cg12143784	7	64541923	0.62019	14.3179	0.03006	2.15e-41	N
rs6968439	7	64460675	T	A	0.407	cg12143784	7	64541923	0.62019	14.3179	0.03006	2.15e-41	N
rs6973112	7	64430992	G	T	0.408	cg12143784	7	64541923	0.62019	14.3179	0.03006	2.15e-41	N
rs71061335	7	64415545	I	R	0.408	cg12143784	7	64541923	0.62019	14.3179	0.03006	2.15e-41	N
rs7383888	7	64478878	G	A	0.407	cg12143784	7	64541923	0.62019	14.3179	0.03006	2.15e-41	N
rs7789394	7	64449580	T	C	0.407	cg12143784	7	64541923	0.62019	14.3179	0.03006	2.15e-41	N
rs7799155	7	64421221	T	C	0.408	cg12143784	7	64541923	0.62019	14.3179	0.03006	2.15e-41	N
rs7800787	7	64416284	T	C	0.408	cg12143784	7	64541923	0.62019	14.3179	0.03006	2.15e-41	N
rs7801355	7	64482282	C	T	0.407	cg12143784	7	64541923	0.62019	14.3179	0.03006	2.15e-41	N
rs7803542	7	64449113	C	A	0.407	cg12143784	7	64541923	0.62019	14.3179	0.03006	2.15e-41	N
rs7811966	7	64477444	C	T	0.407	cg12143784	7	64541923	0.62019	14.3179	0.03006	2.15e-41	N
rs9638216	7	64462079	G	A	0.407	cg12143784	7	64541923	0.62019	14.3179	0.03006	2.15e-41	N
rs143589973	7	64969612	D	R	0.396	cg12143784	7	64541923	0.62405	14.2963	0.02954	2.75e-41	N
rs35964212	7	64412161	D	R	0.408	cg12143784	7	64541923	0.61805	14.2914	0.02997	2.91e-41	N
rs200075714	7	64540577	D	R	0.408	cg12143784	7	64541923	0.61661	14.2848	0.0297	3.13e-41	N
rs201776032	7	64540569	I	R	0.408	cg12143784	7	64541923	0.61661	14.2848	0.0297	3.13e-41	N
rs201241726	2	232043668	D	R	0.164	cg07929768	2	232055508	0.77523	14.2643	0.06449	3.95e-41	N
rs11762360	7	64564822	C	T	0.399	cg12143784	7	64541923	0.62061	14.2558	0.02984	4.35e-41	N
rs11771857	7	64564792	T	C	0.399	cg12143784	7	64541923	0.62061	14.2558	0.02984	4.35e-41	N
rs55727653	7	64564139	T	A	0.399	cg12143784	7	64541923	0.62061	14.2558	0.02984	4.35e-41	N
rs56121042	7	64564088	A	T	0.399	cg12143784	7	64541923	0.62061	14.2558	0.02984	4.35e-41	N
rs71534002	7	64565283	A	G	0.399	cg12143784	7	64541923	0.62061	14.2558	0.02984	4.35e-41	N
rs75957074	7	64748243	G	A	0.388	cg12143784	7	64541923	0.61953	14.2444	0.02576	4.95e-41	N
rs11771915	7	64552489	A	G	0.402	cg12143784	7	64541923	0.61514	14.2426	0.02993	5.05e-41	N
rs71562959	7	64552213	G	A	0.402	cg12143784	7	64541923	0.61514	14.2426	0.02993	5.05e-41	N
rs12671632	7	64496716	T	C	0.406	cg12143784	7	64541923	0.61869	14.2381	0.02934	5.32e-41	N
rs10244630	7	64768278	T	C	0.407	cg12143784	7	64541923	0.61161	14.2245	0.02801	6.2e-41	N
rs10263834	7	64769344	G	A	0.407	cg12143784	7	64541923	0.61161	14.2245	0.02801	6.2e-41	N
rs10267741	7	64769862	G	T	0.407	cg12143784	7	64541923	0.61161	14.2245	0.02801	6.2e-41	N
rs10277384	7	64769259	A	G	0.407	cg12143784	7	64541923	0.61161	14.2245	0.02801	6.2e-41	N
rs10949984	7	64766993	A	G	0.405	cg12143784	7	64541923	0.61348	14.2245	0.028	6.2e-41	N
rs10949986	7	64771443	A	G	0.407	cg12143784	7	64541923	0.61161	14.2245	0.02801	6.2e-41	N
rs11772443	7	64761275	C	T	0.405	cg12143784	7	64541923	0.61348	14.2245	0.028	6.2e-41	N
rs11977584	7	64750626	T	C	0.405	cg12143784	7	64541923	0.61348	14.2245	0.028	6.2e-41	N
rs12536326	7	64771191	T	C	0.407	cg12143784	7	64541923	0.61161	14.2245	0.02801	6.2e-41	N
rs12538518	7	64771126	G	A	0.407	cg12143784	7	64541923	0.61161	14.2245	0.02801	6.2e-41	N
rs12539044	7	64771172	G	A	0.407	cg12143784	7	64541923	0.61161	14.2245	0.02801	6.2e-41	N
rs12673478	7	64771705	G	T	0.407	cg12143784	7	64541923	0.61161	14.2245	0.02801	6.2e-41	N
rs13235187	7	64770850	C	A	0.407	cg12143784	7	64541923	0.61161	14.2245	0.02801	6.2e-41	N
rs2672007	7	64754971	C	T	0.405	cg12143784	7	64541923	0.61348	14.2245	0.028	6.2e-41	N
rs35739031	7	64769156	D	R	0.407	cg12143784	7	64541923	0.61161	14.2245	0.02801	6.2e-41	N
rs35888355	7	64762875	C	G	0.405	cg12143784	7	64541923	0.61348	14.2245	0.028	6.2e-41	N
rs4717246	7	64769031	T	C	0.407	cg12143784	7	64541923	0.61161	14.2245	0.02801	6.2e-41	N
rs4718218	7	64768313	G	C	0.407	cg12143784	7	64541923	0.61161	14.2245	0.02801	6.2e-41	N
rs4718219	7	64768324	C	T	0.407	cg12143784	7	64541923	0.61161	14.2245	0.02801	6.2e-41	N
rs4718220	7	64768560	T	C	0.407	cg12143784	7	64541923	0.61161	14.2245	0.02801	6.2e-41	N
rs4718221	7	64768573	A	G	0.407	cg12143784	7	64541923	0.61161	14.2245	0.02801	6.2e-41	N
rs4718222	7	64768741	C	T	0.407	cg12143784	7	64541923	0.61161	14.2245	0.02801	6.2e-41	N
rs4718224	7	64770462	A	G	0.407	cg12143784	7	64541923	0.61161	14.2245	0.02801	6.2e-41	N
rs4718225	7	64770496	T	C	0.407	cg12143784	7	64541923	0.61161	14.2245	0.02801	6.2e-41	N
rs474341	7	64737545	A	G	0.405	cg12143784	7	64541923	0.61348	14.2245	0.028	6.2e-41	N
rs517258	7	64743183	G	T	0.405	cg12143784	7	64541923	0.61348	14.2245	0.028	6.2e-41	N
rs532409	7	64763167	G	A	0.405	cg12143784	7	64541923	0.61348	14.2245	0.028	6.2e-41	N
rs537150	7	64752578	A	T	0.405	cg12143784	7	64541923	0.61348	14.2245	0.028	6.2e-41	N
rs56283995	7	64771887	T	C	0.407	cg12143784	7	64541923	0.61161	14.2245	0.02801	6.2e-41	N
rs590455	7	64763033	T	A	0.405	cg12143784	7	64541923	0.61348	14.2245	0.028	6.2e-41	N
rs608809	7	64756869	C	T	0.405	cg12143784	7	64541923	0.61348	14.2245	0.028	6.2e-41	N
rs635028	7	64741772	T	C	0.405	cg12143784	7	64541923	0.61348	14.2245	0.028	6.2e-41	N
rs658606	7	64753427	A	G	0.405	cg12143784	7	64541923	0.61348	14.2245	0.028	6.2e-41	N
rs66532283	7	64733749	D	R	0.405	cg12143784	7	64541923	0.61348	14.2245	0.028	6.2e-41	N
rs666389	7	64760534	C	T	0.405	cg12143784	7	64541923	0.61348	14.2245	0.028	6.2e-41	N
rs10197001	2	231961582	T	G	0.162	cg07929768	2	232055508	0.7713	14.2111	0.05673	7.22e-41	N
rs12619336	2	231955045	A	C	0.162	cg07929768	2	232055508	0.7713	14.2111	0.05673	7.22e-41	N
rs2161892	2	231965065	A	G	0.162	cg07929768	2	232055508	0.7713	14.2111	0.05673	7.22e-41	N
rs2943352	7	64779851	A	G	0.408	cg12143784	7	64541923	0.61137	14.2017	0.028	8.02e-41	N
rs71562964	7	64571839	C	G	0.399	cg12143784	7	64541923	0.61499	14.1958	0.0294	8.58e-41	N
rs6954275	7	64489926	T	G	0.406	cg12143784	7	64541923	0.61619	14.1811	0.02933	1.01e-40	N
rs111945345	7	64428658	A	G	0.408	cg12143784	7	64541923	0.6159	14.1772	0.03008	1.06e-40	N
rs7803698	7	64427895	T	C	0.408	cg12143784	7	64541923	0.6159	14.1772	0.03008	1.06e-40	N
rs7807855	7	64449629	G	A	0.408	cg12143784	7	64541923	0.6159	14.1772	0.03008	1.06e-40	N
rs200087840	7	64689365	D	R	0.399	cg12143784	7	64541923	0.60992	14.1764	0.02779	1.07e-40	N
rs201770365	7	64689256	I	R	0.399	cg12143784	7	64541923	0.60992	14.1764	0.02779	1.07e-40	N
rs7385793	7	64882501	T	C	0.388	cg12143784	7	64541923	0.61442	14.1382	0.02958	1.64e-40	N
rs11769148	7	64693474	G	A	0.399	cg12143784	7	64541923	0.6088	14.1285	0.0279	1.83e-40	N
rs2419417	7	64690164	T	C	0.399	cg12143784	7	64541923	0.6088	14.1285	0.0279	1.83e-40	N
rs2900858	7	64692326	G	C	0.399	cg12143784	7	64541923	0.6088	14.1285	0.0279	1.83e-40	N
rs3079196	7	64689962	D	R	0.399	cg12143784	7	64541923	0.6088	14.1285	0.0279	1.83e-40	N
rs34739196	7	64696330	T	C	0.399	cg12143784	7	64541923	0.6088	14.1285	0.0279	1.83e-40	N
rs7799516	7	64692186	T	C	0.399	cg12143784	7	64541923	0.6088	14.1285	0.0279	1.83e-40	N
rs61294225	2	231923739	G	A	0.16	cg07929768	2	232055508	0.76906	14.1267	0.05672	1.87e-40	N
rs183811880	7	64882703	C	T	0.39	cg12143784	7	64541923	0.61524	14.1202	0.02965	2.01e-40	N
rs13411148	2	231918754	T	C	0.165	cg07929768	2	232055508	0.75944	14.1114	0.04901	2.22e-40	N
rs35519391	7	64461496	D	R	0.408	cg12143784	7	64541923	0.61237	14.11	0.02999	2.26e-40	N
rs13223327	7	64695829	T	C	0.398	cg12143784	7	64541923	0.60689	14.1023	0.0279	2.46e-40	N
rs75563053	7	64748241	T	C	0.388	cg12143784	7	64541923	0.61397	14.0976	0.0257	2.6e-40	N
rs11773124	7	64942286	C	A	0.391	cg12143784	7	64541923	0.61605	14.0923	0.0296	2.76e-40	N
rs67775311	7	64942289	A	C	0.391	cg12143784	7	64541923	0.61605	14.0923	0.0296	2.76e-40	N
rs593619	7	64697544	A	G	0.4	cg12143784	7	64541923	0.60532	14.062	0.02657	3.88e-40	N
rs594456	7	64697346	T	C	0.4	cg12143784	7	64541923	0.60532	14.062	0.02657	3.88e-40	N
rs78620167	19	50304336	G	A	0.466	cg10751382	19	50391554	0.54975	14.0547	0.13782	4.21e-40	N
rs71535618	7	64978005	C	T	0.416	cg12143784	7	64541923	0.61282	14.0498	0.03028	4.45e-40	N
rs8101959	19	50308893	C	T	0.462	cg10751382	19	50391554	0.54818	14.0282	0.13914	5.67e-40	N
rs2241040	19	50308134	C	G	0.462	cg10751382	19	50391554	0.54726	14.0173	0.13809	6.4e-40	N
rs10421561	19	50304392	C	T	0.464	cg10751382	19	50391554	0.54817	14.0162	0.13847	6.48e-40	N
rs10421754	19	50304439	C	T	0.464	cg10751382	19	50391554	0.54817	14.0162	0.13847	6.48e-40	N
rs10949991	7	64879604	G	T	0.389	cg12143784	7	64541923	0.61043	14.0093	0.02951	7.01e-40	N
rs10949992	7	64879625	G	A	0.389	cg12143784	7	64541923	0.61043	14.0093	0.02951	7.01e-40	N
rs10949993	7	64879701	A	G	0.389	cg12143784	7	64541923	0.61043	14.0093	0.02951	7.01e-40	N
rs10949996	7	64895317	C	A	0.389	cg12143784	7	64541923	0.61043	14.0093	0.02951	7.01e-40	N
rs11770225	7	64879412	T	C	0.389	cg12143784	7	64541923	0.61043	14.0093	0.02951	7.01e-40	N
rs12667358	7	64866075	C	T	0.389	cg12143784	7	64541923	0.61043	14.0093	0.02951	7.01e-40	N
rs12668784	7	64876079	A	G	0.389	cg12143784	7	64541923	0.61043	14.0093	0.02951	7.01e-40	N
rs146460788	7	64862322	D	R	0.389	cg12143784	7	64541923	0.61043	14.0093	0.02951	7.01e-40	N
rs150129239	7	64880552	A	G	0.389	cg12143784	7	64541923	0.61043	14.0093	0.02951	7.01e-40	N
rs34849440	7	64836862	D	R	0.389	cg12143784	7	64541923	0.61043	14.0093	0.02951	7.01e-40	N
rs6948240	7	64840219	G	A	0.389	cg12143784	7	64541923	0.61043	14.0093	0.02951	7.01e-40	N
rs6965832	7	64871753	C	A	0.389	cg12143784	7	64541923	0.61043	14.0093	0.02951	7.01e-40	N
rs6973088	7	64877430	C	T	0.389	cg12143784	7	64541923	0.61043	14.0093	0.02951	7.01e-40	N
rs71562992	7	64843025	A	G	0.389	cg12143784	7	64541923	0.61043	14.0093	0.02951	7.01e-40	N
rs7788406	7	64885736	T	C	0.389	cg12143784	7	64541923	0.61043	14.0093	0.02951	7.01e-40	N
rs7788644	7	64866144	C	T	0.389	cg12143784	7	64541923	0.61043	14.0093	0.02951	7.01e-40	N
rs7802108	7	64881162	T	G	0.389	cg12143784	7	64541923	0.61043	14.0093	0.02951	7.01e-40	N
rs7806475	7	64860110	A	G	0.389	cg12143784	7	64541923	0.61043	14.0093	0.02951	7.01e-40	N
rs7806618	7	64885560	T	A	0.389	cg12143784	7	64541923	0.61043	14.0093	0.02951	7.01e-40	N
rs79175588	7	64884327	A	G	0.389	cg12143784	7	64541923	0.61043	14.0093	0.02951	7.01e-40	N
rs62197317	2	232054467	C	T	0.178	cg27665808	2	232055229	0.75529	13.9982	0.07642	7.93e-40	N
rs2305918	19	50315773	A	T	0.461	cg10751382	19	50391554	0.54604	13.9967	0.13784	8.07e-40	N
rs28413128	19	50300026	G	A	0.463	cg10751382	19	50391554	0.54599	13.9838	0.13847	9.33e-40	N
rs113034585	7	64717376	A	G	0.397	cg12143784	7	64541923	0.60335	13.9788	0.02775	9.86e-40	N
rs12536289	7	64714034	A	G	0.397	cg12143784	7	64541923	0.60335	13.9788	0.02775	9.86e-40	N
rs13227242	7	64707237	A	G	0.397	cg12143784	7	64541923	0.60335	13.9788	0.02775	9.86e-40	N
rs13227243	7	64707243	A	G	0.397	cg12143784	7	64541923	0.60335	13.9788	0.02775	9.86e-40	N
rs13227507	7	64707429	A	G	0.397	cg12143784	7	64541923	0.60335	13.9788	0.02775	9.86e-40	N
rs142293992	7	64714111	D	R	0.397	cg12143784	7	64541923	0.60335	13.9788	0.02775	9.86e-40	N
rs17710097	7	64727862	A	G	0.397	cg12143784	7	64541923	0.60335	13.9788	0.02775	9.86e-40	N
rs17782771	7	64727166	C	G	0.397	cg12143784	7	64541923	0.60335	13.9788	0.02775	9.86e-40	N
rs28496606	7	64701910	A	G	0.397	cg12143784	7	64541923	0.60335	13.9788	0.02775	9.86e-40	N
rs3899200	7	64710141	T	G	0.397	cg12143784	7	64541923	0.60335	13.9788	0.02775	9.86e-40	N
rs66671129	7	64712912	T	C	0.397	cg12143784	7	64541923	0.60335	13.9788	0.02775	9.86e-40	N
rs7778919	7	64726113	A	G	0.397	cg12143784	7	64541923	0.60335	13.9788	0.02775	9.86e-40	N
rs78138873	7	64717510	C	A	0.397	cg12143784	7	64541923	0.60335	13.9788	0.02775	9.86e-40	N
rs9769692	7	64725535	T	C	0.397	cg12143784	7	64541923	0.60335	13.9788	0.02775	9.86e-40	N
rs13221806	7	64700373	T	C	0.399	cg12143784	7	64541923	0.60468	13.9734	0.0279	1.05e-39	N
rs35512631	7	64894781	A	G	0.388	cg12143784	7	64541923	0.60856	13.9692	0.02932	1.1e-39	N
rs4718207	7	64729972	T	C	0.391	cg12143784	7	64541923	0.60219	13.9598	0.02842	1.22e-39	N
rs12612219	2	232107363	T	G	0.206	cg07929768	2	232055508	0.70891	13.9563	0.03472	1.27e-39	N
rs7569597	2	232102754	A	G	0.206	cg07929768	2	232055508	0.70891	13.9563	0.03472	1.27e-39	N
rs7606037	2	232054576	C	T	0.336	cg07929768	2	232055508	0.61475	13.9459	0.03329	1.42e-39	N
rs72983683	2	232100970	T	G	0.205	cg07929768	2	232055508	0.71164	13.9359	0.03977	1.59e-39	N
rs12333375	7	64926823	G	A	0.388	cg12143784	7	64541923	0.60851	13.931	0.02923	1.68e-39	N
rs12670926	7	64914870	T	G	0.388	cg12143784	7	64541923	0.60851	13.931	0.02923	1.68e-39	N
rs1812771	7	64925829	T	C	0.388	cg12143784	7	64541923	0.60851	13.931	0.02923	1.68e-39	N
rs6971058	7	64906307	A	G	0.388	cg12143784	7	64541923	0.60851	13.931	0.02923	1.68e-39	N
rs7796291	7	64717219	C	T	0.396	cg12143784	7	64541923	0.60097	13.924	0.02772	1.82e-39	N
rs10173555	2	232108769	G	C	0.206	cg07929768	2	232055508	0.70704	13.9173	0.03467	1.96e-39	N
rs10177091	2	232109889	T	C	0.206	cg07929768	2	232055508	0.70704	13.9173	0.03467	1.96e-39	N
rs657560	7	64700434	C	T	0.399	cg12143784	7	64541923	0.6012	13.9074	0.02657	2.19e-39	N
rs7808743	7	64717208	A	G	0.396	cg12143784	7	64541923	0.60129	13.8984	0.02639	2.42e-39	N
rs2418470	7	64830594	G	A	0.404	cg12143784	7	64541923	0.60772	13.8864	0.02651	2.77e-39	N
rs62193695	2	231918203	T	A	0.164	cg07929768	2	232055508	0.75568	13.8812	0.06445	2.94e-39	N
rs4801807	19	50313806	G	A	0.483	cg10751382	19	50391554	0.54506	13.8765	0.1347	3.09e-39	N
rs13418595	2	232126597	A	G	0.206	cg07929768	2	232055508	0.70792	13.8665	0.03973	3.46e-39	N
rs6437005	2	232055735	G	A	0.335	cg07929768	2	232055508	0.61318	13.8648	0.03321	3.53e-39	N
rs12535540	7	64647860	A	G	0.397	cg12143784	7	64541923	0.5999	13.8583	0.02923	3.79e-39	N
rs1290647	19	50366164	A	C	0.346	cg14071503	19	50391752	0.59896	13.8567	0.05711	3.86e-39	N
rs13411443	2	231918871	C	G	0.167	cg07929768	2	232055508	0.74715	13.8546	0.05672	3.95e-39	N
rs1808614	7	64899653	A	T	0.389	cg12143784	7	64541923	0.60678	13.8544	0.02923	3.96e-39	N
rs4018034	2	232142258	I	R	0.247	cg07929768	2	232055508	0.65329	13.8496	0.04559	4.18e-39	N
rs7258104	19	50299757	G	A	0.485	cg10751382	19	50391554	0.54333	13.8488	0.1343	4.22e-39	N
rs200742460	2	231986695	D	R	0.153	cg07929768	2	232055508	0.77977	13.8356	0.06459	4.88e-39	N
rs142481868	7	64648479	T	C	0.399	cg12143784	7	64541923	0.59659	13.8175	0.02667	5.97e-39	N
rs2049440	7	64547656	C	T	0.433	cg12143784	7	64541923	0.5944	13.8008	0.02635	7.19e-39	N
rs7780291	7	64917109	T	C	0.388	cg12143784	7	64541923	0.60406	13.7902	0.02942	8.09e-39	N
rs62197345	2	232126698	A	C	0.256	cg27665808	2	232055229	0.63687	13.7395	0.07266	1.42e-38	N
rs12535560	7	64647990	A	G	0.397	cg12143784	7	64541923	0.59617	13.7367	0.02933	1.46e-38	N
rs4718198	7	64666923	A	G	0.4	cg12143784	7	64541923	0.59407	13.7358	0.02639	1.48e-38	N
rs181908062	7	64718134	A	G	0.39	cg12143784	7	64541923	0.59182	13.735	0.0286	1.49e-38	N
rs2072451	19	50299408	G	T	0.496	cg10751382	19	50391554	0.54358	13.7225	0.13088	1.72e-38	N
rs71562980	7	64653177	A	G	0.4	cg12143784	7	64541923	0.59565	13.7134	0.02801	1.9e-38	N
rs200093423	7	64686600	D	R	0.403	cg12143784	7	64541923	0.59072	13.6957	0.02613	2.31e-38	N
rs201668815	7	64686577	D	R	0.403	cg12143784	7	64541923	0.59072	13.6957	0.02613	2.31e-38	N
rs35513558	7	64681703	A	G	0.403	cg12143784	7	64541923	0.59072	13.6957	0.02613	2.31e-38	N
rs4718201	7	64683929	T	C	0.403	cg12143784	7	64541923	0.59072	13.6957	0.02613	2.31e-38	N
rs73143330	7	64679574	G	A	0.403	cg12143784	7	64541923	0.59072	13.6957	0.02613	2.31e-38	N
rs185321923	7	64651762	A	G	0.399	cg12143784	7	64541923	0.59089	13.6532	0.02646	3.69e-38	N
rs28690417	2	232064182	A	G	0.206	cg27665808	2	232055229	0.69675	13.6383	0.07544	4.35e-38	N
rs589139	7	64762751	C	T	0.414	cg12143784	7	64541923	0.59653	13.6326	0.02639	4.64e-38	N
rs188662478	7	64646279	T	C	0.401	cg12143784	7	64541923	0.58835	13.6188	0.02667	5.39e-38	N
rs2305919	19	50315698	C	A	0.478	cg10751382	19	50391554	0.53657	13.6153	0.13288	5.61e-38	N
rs549970	7	64759913	T	A	0.415	cg12143784	7	64541923	0.59738	13.6091	0.0265	6e-38	N
rs589171	7	64762769	C	T	0.413	cg12143784	7	64541923	0.59462	13.5939	0.02629	7.1e-38	N
rs11767453	7	64671074	T	C	0.401	cg12143784	7	64541923	0.58398	13.5589	0.02589	1.04e-37	N
rs12669040	7	64675390	T	G	0.401	cg12143784	7	64541923	0.58398	13.5589	0.02589	1.04e-37	N
rs141830477	7	64670116	T	C	0.401	cg12143784	7	64541923	0.58398	13.5589	0.02589	1.04e-37	N
rs9768289	7	64674971	C	T	0.401	cg12143784	7	64541923	0.58398	13.5589	0.02589	1.04e-37	N
rs62470502	7	64974351	A	C	0.429	cg12143784	7	64541923	0.59504	13.4882	0.02695	2.27e-37	N
rs145963513	7	64659193	A	G	0.402	cg12143784	7	64541923	0.58176	13.4488	0.02599	3.5e-37	N
rs55761641	7	64718394	T	C	0.393	cg12143784	7	64541923	0.58201	13.4471	0.02709	3.56e-37	N
rs58553263	7	64654571	T	A	0.403	cg12143784	7	64541923	0.57992	13.4283	0.02563	4.37e-37	N
rs71562969	7	64637118	A	C	0.406	cg12143784	7	64541923	0.58099	13.42	0.02597	4.79e-37	N
rs138385503	7	64674842	D	R	0.4	cg12143784	7	64541923	0.57947	13.411	0.02566	5.29e-37	N
rs200818964	19	50400731	I	R	0.474	cg14071503	19	50391752	0.54701	13.407	0.05134	5.52e-37	N
rs2943367	7	64639111	T	C	0.406	cg12143784	7	64541923	0.57969	13.3975	0.02587	6.13e-37	N
rs4718196	7	64643161	T	A	0.404	cg12143784	7	64541923	0.57927	13.3679	0.02611	8.46e-37	N
rs111391035	7	64491188	D	R	0.459	cg12143784	7	64541923	0.56742	13.3647	0.02579	8.75e-37	N
rs7584535	2	232106857	T	C	0.28	cg27665808	2	232055229	0.61832	13.3559	0.07761	9.64e-37	N
rs12621567	2	232118813	C	T	0.282	cg27665808	2	232055229	0.61841	13.3526	0.07761	1e-36	N
rs13415839	2	232126534	T	C	0.282	cg27665808	2	232055229	0.61841	13.3526	0.07761	1e-36	N
rs13428369	2	232125632	C	T	0.282	cg27665808	2	232055229	0.61841	13.3526	0.07761	1e-36	N
rs200139389	2	232127714	D	R	0.282	cg27665808	2	232055229	0.61841	13.3526	0.07761	1e-36	N
rs36036355	2	232127712	D	R	0.282	cg27665808	2	232055229	0.61841	13.3526	0.07761	1e-36	N
rs6711312	2	232122348	C	T	0.282	cg27665808	2	232055229	0.61841	13.3526	0.07761	1e-36	N
rs6724253	2	232121998	G	A	0.282	cg27665808	2	232055229	0.61841	13.3526	0.07761	1e-36	N
rs7598478	2	232115887	T	C	0.282	cg27665808	2	232055229	0.61841	13.3526	0.07761	1e-36	N
rs9973370	2	232095587	G	A	0.28	cg27665808	2	232055229	0.61789	13.3473	0.07742	1.06e-36	N
rs10229485	7	64518873	C	T	0.456	cg12143784	7	64541923	0.56644	13.3466	0.02551	1.07e-36	N
rs10243523	7	64517149	C	G	0.456	cg12143784	7	64541923	0.56644	13.3466	0.02551	1.07e-36	N
rs10252925	7	64544767	T	C	0.456	cg12143784	7	64541923	0.56644	13.3466	0.02551	1.07e-36	N
rs1709476	7	64562912	G	C	0.456	cg12143784	7	64541923	0.56644	13.3466	0.02551	1.07e-36	N
rs1709515	7	64551864	C	T	0.456	cg12143784	7	64541923	0.56644	13.3466	0.02551	1.07e-36	N
rs2671945	7	64563772	G	A	0.456	cg12143784	7	64541923	0.56644	13.3466	0.02551	1.07e-36	N
rs34897549	7	64516681	G	A	0.456	cg12143784	7	64541923	0.56644	13.3466	0.02551	1.07e-36	N
rs3864395	7	64543900	C	T	0.456	cg12143784	7	64541923	0.56644	13.3466	0.02551	1.07e-36	N
rs4717239	7	64536853	C	G	0.456	cg12143784	7	64541923	0.56644	13.3466	0.02551	1.07e-36	N
rs4718188	7	64522519	C	T	0.456	cg12143784	7	64541923	0.56644	13.3466	0.02551	1.07e-36	N
rs4718190	7	64541235	C	T	0.456	cg12143784	7	64541923	0.56644	13.3466	0.02551	1.07e-36	N
rs55762719	7	64542177	G	A	0.456	cg12143784	7	64541923	0.56644	13.3466	0.02551	1.07e-36	N
rs62457195	7	64538486	C	T	0.456	cg12143784	7	64541923	0.56644	13.3466	0.02551	1.07e-36	N
rs66688157	7	64532115	C	T	0.456	cg12143784	7	64541923	0.56644	13.3466	0.02551	1.07e-36	N
rs6947903	7	64516272	A	G	0.456	cg12143784	7	64541923	0.56644	13.3466	0.02551	1.07e-36	N
rs6958923	7	64541010	T	A	0.456	cg12143784	7	64541923	0.56644	13.3466	0.02551	1.07e-36	N
rs6960448	7	64536000	T	C	0.456	cg12143784	7	64541923	0.56644	13.3466	0.02551	1.07e-36	N
rs6962429	7	64516103	C	T	0.456	cg12143784	7	64541923	0.56644	13.3466	0.02551	1.07e-36	N
rs6971128	7	64540548	G	A	0.456	cg12143784	7	64541923	0.56644	13.3466	0.02551	1.07e-36	N
rs6971927	7	64541049	G	T	0.456	cg12143784	7	64541923	0.56644	13.3466	0.02551	1.07e-36	N
rs6972556	7	64540675	C	G	0.456	cg12143784	7	64541923	0.56644	13.3466	0.02551	1.07e-36	N
rs6974079	7	64535631	C	A	0.456	cg12143784	7	64541923	0.56644	13.3466	0.02551	1.07e-36	N
rs2368563	2	232058493	G	A	0.295	cg27665808	2	232055229	0.60821	13.3405	0.06414	1.14e-36	N
rs62197322	2	232061520	G	A	0.295	cg27665808	2	232055229	0.60821	13.3405	0.06414	1.14e-36	N
rs12470450	2	232113888	A	T	0.281	cg27665808	2	232055229	0.61759	13.3337	0.07742	1.23e-36	N
rs1881484	2	232112450	G	C	0.281	cg27665808	2	232055229	0.61759	13.3337	0.07742	1.23e-36	N
rs60664562	2	232060843	A	T	0.295	cg27665808	2	232055229	0.6081	13.3334	0.06422	1.23e-36	N
rs6437010	2	232113263	C	G	0.281	cg27665808	2	232055229	0.61759	13.3337	0.07742	1.23e-36	N
rs6704770	2	232109816	G	T	0.281	cg27665808	2	232055229	0.61759	13.3337	0.07742	1.23e-36	N
rs7780100	7	64442904	G	A	0.458	cg12143784	7	64541923	0.56739	13.3299	0.02574	1.28e-36	N
rs151079997	7	64637067	A	G	0.405	cg12143784	7	64541923	0.57677	13.3283	0.02576	1.3e-36	N
rs6437008	2	232091948	G	C	0.337	cg07929768	2	232055508	0.58904	13.3194	0.03194	1.43e-36	N
rs28972313	7	64687000	A	G	0.395	cg12143784	7	64541923	0.57972	13.3155	0.02589	1.5e-36	N
rs1818916	7	64529777	G	A	0.457	cg12143784	7	64541923	0.56588	13.3123	0.02552	1.55e-36	N
rs73352007	7	64640357	T	A	0.404	cg12143784	7	64541923	0.57731	13.3123	0.02611	1.55e-36	N
rs148270424	7	64639324	A	G	0.404	cg12143784	7	64541923	0.57619	13.2945	0.0261	1.88e-36	N
rs200014481	7	64647331	I	R	0.438	cg12143784	7	64541923	0.56923	13.2807	0.02551	2.19e-36	N
rs1290646	19	50363175	A	G	0.493	cg14071503	19	50391752	-0.53764	-13.2786	0.05475	2.24e-36	N
rs144549877	2	232059421	D	R	0.297	cg27665808	2	232055229	0.60421	13.2685	0.06439	2.5e-36	N
rs61167047	7	64622864	A	G	0.419	cg12143784	7	64541923	0.57788	13.2642	0.02505	2.61e-36	N
rs921470	19	50343129	T	C	0.495	cg14071503	19	50391752	-0.53772	-13.2608	0.05459	2.71e-36	N
rs35953728	7	64477979	T	C	0.457	cg12143784	7	64541923	0.56643	13.2581	0.02606	2.79e-36	N
rs1290648	19	50366363	G	A	0.399	cg10751382	19	50391554	0.54164	13.2438	0.13676	3.26e-36	N
rs4802635	19	50401320	A	G	0.446	cg10751382	19	50391554	-0.52768	-13.2335	0.11364	3.65e-36	N
rs149995189	7	64493338	C	T	0.458	cg12143784	7	64541923	0.56211	13.229	0.02516	3.83e-36	N
rs34201260	7	64532354	A	G	0.458	cg12143784	7	64541923	0.56035	13.2213	0.0249	4.16e-36	N
rs10237971	7	64508481	G	T	0.458	cg12143784	7	64541923	0.56231	13.209	0.02546	4.76e-36	N
rs11760504	7	64487555	C	T	0.458	cg12143784	7	64541923	0.56231	13.209	0.02546	4.76e-36	N
rs11764811	7	64487625	T	C	0.458	cg12143784	7	64541923	0.56231	13.209	0.02546	4.76e-36	N
rs13222578	7	64512239	C	T	0.458	cg12143784	7	64541923	0.56231	13.209	0.02546	4.76e-36	N
rs13229762	7	64484439	G	A	0.458	cg12143784	7	64541923	0.56231	13.209	0.02546	4.76e-36	N
rs2103148	7	64502621	T	G	0.458	cg12143784	7	64541923	0.56231	13.209	0.02546	4.76e-36	N
rs28872832	7	64486813	C	T	0.458	cg12143784	7	64541923	0.56231	13.209	0.02546	4.76e-36	N
rs34171289	7	64491684	G	A	0.458	cg12143784	7	64541923	0.56231	13.209	0.02546	4.76e-36	N
rs35679667	7	64498368	C	A	0.458	cg12143784	7	64541923	0.56231	13.209	0.02546	4.76e-36	N
rs3982216	7	64506602	G	T	0.458	cg12143784	7	64541923	0.56231	13.209	0.02546	4.76e-36	N
rs56303509	7	64488252	A	C	0.458	cg12143784	7	64541923	0.56231	13.209	0.02546	4.76e-36	N
rs58134413	7	64490841	G	C	0.458	cg12143784	7	64541923	0.56231	13.209	0.02546	4.76e-36	N
rs60495996	7	64492932	C	G	0.458	cg12143784	7	64541923	0.56231	13.209	0.02546	4.76e-36	N
rs62455989	7	64496892	C	A	0.458	cg12143784	7	64541923	0.56231	13.209	0.02546	4.76e-36	N
rs62455992	7	64499128	A	C	0.458	cg12143784	7	64541923	0.56231	13.209	0.02546	4.76e-36	N
rs6950807	7	64504812	A	G	0.458	cg12143784	7	64541923	0.56231	13.209	0.02546	4.76e-36	N
rs6965753	7	64506904	T	G	0.458	cg12143784	7	64541923	0.56231	13.209	0.02546	4.76e-36	N
rs76554912	7	64493654	A	G	0.458	cg12143784	7	64541923	0.56231	13.209	0.02546	4.76e-36	N
rs77829487	7	64494261	T	C	0.458	cg12143784	7	64541923	0.56231	13.209	0.02546	4.76e-36	N
rs9770631	7	64494788	A	T	0.458	cg12143784	7	64541923	0.56231	13.209	0.02546	4.76e-36	N
rs1967609	7	64510201	A	G	0.461	cg12143784	7	64541923	0.5638	13.2054	0.02524	4.94e-36	N
rs1060379	7	64435489	A	T	0.458	cg12143784	7	64541923	0.56359	13.2025	0.02579	5.1e-36	N
rs112888789	7	64460557	D	R	0.458	cg12143784	7	64541923	0.56359	13.2025	0.02579	5.1e-36	N
rs11771529	7	64446519	G	A	0.458	cg12143784	7	64541923	0.56359	13.2025	0.02579	5.1e-36	N
rs12056025	7	64449081	A	G	0.458	cg12143784	7	64541923	0.56359	13.2025	0.02579	5.1e-36	N
rs12056103	7	64450713	T	C	0.458	cg12143784	7	64541923	0.56359	13.2025	0.02579	5.1e-36	N
rs13226855	7	64433703	T	C	0.458	cg12143784	7	64541923	0.56359	13.2025	0.02579	5.1e-36	N
rs13233376	7	64440562	T	C	0.458	cg12143784	7	64541923	0.56359	13.2025	0.02579	5.1e-36	N
rs13238842	7	64429823	T	C	0.458	cg12143784	7	64541923	0.56359	13.2025	0.02579	5.1e-36	N
rs148094324	7	64427932	G	A	0.458	cg12143784	7	64541923	0.56359	13.2025	0.02579	5.1e-36	N
rs2419256	7	64471881	T	G	0.458	cg12143784	7	64541923	0.56359	13.2025	0.02579	5.1e-36	N
rs28835689	7	64464998	A	C	0.458	cg12143784	7	64541923	0.56359	13.2025	0.02579	5.1e-36	N
rs3088174	7	64451426	C	T	0.458	cg12143784	7	64541923	0.56359	13.2025	0.02579	5.1e-36	N
rs34226549	7	64415191	D	R	0.458	cg12143784	7	64541923	0.56359	13.2025	0.02579	5.1e-36	N
rs34577522	7	64450927	I	R	0.458	cg12143784	7	64541923	0.56359	13.2025	0.02579	5.1e-36	N
rs34636014	7	64453634	G	A	0.458	cg12143784	7	64541923	0.56359	13.2025	0.02579	5.1e-36	N
rs34639489	7	64452830	C	T	0.458	cg12143784	7	64541923	0.56359	13.2025	0.02579	5.1e-36	N
rs4266535	7	64470842	G	A	0.458	cg12143784	7	64541923	0.56359	13.2025	0.02579	5.1e-36	N
rs4379351	7	64433265	G	A	0.458	cg12143784	7	64541923	0.56359	13.2025	0.02579	5.1e-36	N
rs4481471	7	64470807	C	T	0.458	cg12143784	7	64541923	0.56359	13.2025	0.02579	5.1e-36	N
rs4718180	7	64462326	A	C	0.458	cg12143784	7	64541923	0.56359	13.2025	0.02579	5.1e-36	N
rs4718187	7	64481966	G	A	0.458	cg12143784	7	64541923	0.56359	13.2025	0.02579	5.1e-36	N
rs55959098	7	64447463	T	G	0.458	cg12143784	7	64541923	0.56359	13.2025	0.02579	5.1e-36	N
rs56294715	7	64455399	G	A	0.458	cg12143784	7	64541923	0.56359	13.2025	0.02579	5.1e-36	N
rs56340521	7	64447455	C	T	0.458	cg12143784	7	64541923	0.56359	13.2025	0.02579	5.1e-36	N
rs67896886	7	64426807	G	C	0.458	cg12143784	7	64541923	0.56359	13.2025	0.02579	5.1e-36	N
rs6949340	7	64430872	C	G	0.458	cg12143784	7	64541923	0.56359	13.2025	0.02579	5.1e-36	N
rs6955268	7	64419559	G	A	0.458	cg12143784	7	64541923	0.56359	13.2025	0.02579	5.1e-36	N
rs6961678	7	64435692	T	A	0.458	cg12143784	7	64541923	0.56359	13.2025	0.02579	5.1e-36	N
rs77872104	7	64428841	T	A	0.458	cg12143784	7	64541923	0.56359	13.2025	0.02579	5.1e-36	N
rs7806567	7	64465502	G	A	0.458	cg12143784	7	64541923	0.56359	13.2025	0.02579	5.1e-36	N
rs9638417	7	64436700	G	T	0.458	cg12143784	7	64541923	0.56359	13.2025	0.02579	5.1e-36	N
rs9647852	7	64417826	C	A	0.458	cg12143784	7	64541923	0.56359	13.2025	0.02579	5.1e-36	N
rs35079894	7	64410459	T	G	0.459	cg12143784	7	64541923	0.56211	13.1855	0.02551	6.13e-36	N
rs67499519	7	64411148	G	T	0.459	cg12143784	7	64541923	0.56211	13.1855	0.02551	6.13e-36	N
rs6965099	7	64411367	C	T	0.459	cg12143784	7	64541923	0.56211	13.1855	0.02551	6.13e-36	N
rs6978332	7	64411386	T	G	0.459	cg12143784	7	64541923	0.56211	13.1855	0.02551	6.13e-36	N
rs67337284	7	64636844	A	G	0.407	cg12143784	7	64541923	0.57155	13.1836	0.02541	6.26e-36	N
rs140184363	7	64637068	T	C	0.406	cg12143784	7	64541923	0.57223	13.1716	0.02576	7.13e-36	N
rs4718197	7	64666785	A	G	0.4	cg12143784	7	64541923	0.57047	13.1689	0.02581	7.34e-36	N
rs10544278	2	232139717	D	R	0.221	cg27665808	2	232055229	0.64631	13.1637	0.07675	7.76e-36	N
rs59823376	2	232138371	A	G	0.222	cg27665808	2	232055229	0.64284	13.1412	0.0763	9.89e-36	N
rs72985811	2	232137146	C	A	0.222	cg27665808	2	232055229	0.64284	13.1412	0.0763	9.89e-36	N
rs658360	7	64700289	G	A	0.442	cg12143784	7	64541923	0.56188	13.141	0.0251	9.92e-36	N
rs143826539	7	64606192	D	R	0.414	cg12143784	7	64541923	0.57883	13.1367	0.02565	1.04e-35	N
rs66632995	7	64509112	D	R	0.465	cg12143784	7	64541923	0.56121	13.1332	0.02542	1.08e-35	N
rs116719763	7	64621688	T	C	0.42	cg12143784	7	64541923	0.57168	13.1199	0.02475	1.25e-35	N
rs114132853	7	64606235	G	A	0.418	cg12143784	7	64541923	0.57532	13.1164	0.0256	1.29e-35	N
rs35723371	7	64691780	T	A	0.444	cg12143784	7	64541923	0.56094	13.1075	0.0251	1.42e-35	N
rs495336	7	64698500	C	T	0.444	cg12143784	7	64541923	0.56094	13.1075	0.0251	1.42e-35	N
rs673957	7	64699105	G	A	0.444	cg12143784	7	64541923	0.56094	13.1075	0.0251	1.42e-35	N
rs7792874	7	64694563	C	A	0.444	cg12143784	7	64541923	0.56094	13.1075	0.0251	1.42e-35	N
rs7796077	7	64694241	A	T	0.444	cg12143784	7	64541923	0.56094	13.1075	0.0251	1.42e-35	N
rs59952853	16	58016861	A	G	0.216	cg00491255	16	58019984	0.63648	13.1052	0.05032	1.46e-35	N
rs12467855	2	232045517	A	G	0.165	cg27665808	2	232055229	0.73048	13.1044	0.07691	1.47e-35	N
rs16827834	2	232045648	T	C	0.165	cg27665808	2	232055229	0.73048	13.1044	0.07691	1.47e-35	N
rs2887283	2	232043850	C	A	0.165	cg27665808	2	232055229	0.73048	13.1044	0.07691	1.47e-35	N
rs55998106	2	232049648	A	G	0.165	cg27665808	2	232055229	0.73048	13.1044	0.07691	1.47e-35	N
rs6727422	2	232045064	T	C	0.165	cg27665808	2	232055229	0.73048	13.1044	0.07691	1.47e-35	N
rs7585622	2	232047561	T	C	0.165	cg27665808	2	232055229	0.73048	13.1044	0.07691	1.47e-35	N
rs7588692	2	232048059	T	C	0.165	cg27665808	2	232055229	0.73048	13.1044	0.07691	1.47e-35	N
rs7592659	2	232049056	C	G	0.165	cg27665808	2	232055229	0.73048	13.1044	0.07691	1.47e-35	N
rs2159984	19	50305688	C	G	0.454	cg10751382	19	50391554	0.51752	13.0935	0.13326	1.66e-35	N
rs1709475	7	64562410	G	C	0.459	cg12143784	7	64541923	0.55882	13.0911	0.02551	1.7e-35	N
rs1967610	7	64510183	C	G	0.46	cg12143784	7	64541923	0.56007	13.0911	0.02551	1.7e-35	N
rs55970645	2	232052494	A	G	0.292	cg27665808	2	232055229	0.60398	13.0801	0.06322	1.91e-35	N
rs6950483	7	64564787	A	C	0.452	cg12143784	7	64541923	0.55316	13.0415	0.02561	2.9e-35	N
rs200494705	7	64686896	D	R	0.397	cg12143784	7	64541923	0.56656	13.0275	0.02524	3.37e-35	N
rs2419281	7	64692651	G	C	0.444	cg12143784	7	64541923	0.55848	13.0206	0.02508	3.62e-35	N
rs4507646	7	64554705	G	T	0.467	cg12143784	7	64541923	0.55306	13.0156	0.02443	3.82e-35	N
rs62455714	7	64653060	A	G	0.442	cg12143784	7	64541923	0.55693	13.0056	0.0248	4.26e-35	N
rs56295567	2	232048612	G	A	0.314	cg07929768	2	232055508	0.58588	12.9596	0.03221	6.97e-35	N
rs10949972	7	64620753	A	T	0.416	cg12143784	7	64541923	0.57058	12.9543	0.02495	7.37e-35	N
rs35750632	2	232022300	I	R	0.184	cg07929768	2	232055508	0.69061	12.9431	0.06452	8.31e-35	N
rs150937531	7	64610138	C	T	0.414	cg12143784	7	64541923	0.57609	12.9383	0.02432	8.75e-35	N
rs193057929	7	64882879	A	C	0.419	cg12143784	7	64541923	0.56369	12.926	0.02558	9.98e-35	N
rs60596955	2	232138241	T	C	0.219	cg27665808	2	232055229	0.64167	12.916	0.07472	1.11e-34	N
rs9973970	2	232097383	C	T	0.338	cg07929768	2	232055508	0.57805	12.9095	0.03207	1.19e-34	N
rs9663150	10	42442071	T	C	0.498	cg16633951	10	42971575	-0.5504	-12.9064	0.05104	1.23e-34	N
rs111809035	14	104347984	G	C	0.036	cg22994272	14	104346241	1.3985	12.9023	0	1.29e-34	N
rs17101902	14	104358094	C	A	0.036	cg22994272	14	104346241	1.3985	12.9023	0	1.29e-34	N
rs188664062	14	104355328	G	T	0.036	cg22994272	14	104346241	1.3985	12.9023	0	1.29e-34	N
rs74890977	14	104357249	T	C	0.036	cg22994272	14	104346241	1.3985	12.9023	0	1.29e-34	N
rs76647940	14	104346278	T	C	0.036	cg22994272	14	104346241	1.3985	12.9023	0	1.29e-34	N
rs76867575	14	104349177	T	C	0.036	cg22994272	14	104346241	1.3985	12.9023	0	1.29e-34	N
rs77970149	14	104348078	A	G	0.036	cg22994272	14	104346241	1.3985	12.9023	0	1.29e-34	N
rs79553073	14	104336397	T	C	0.036	cg22994272	14	104346241	1.3985	12.9023	0	1.29e-34	N
rs10198572	2	232096723	A	G	0.338	cg07929768	2	232055508	0.57799	12.8995	0.03207	1.32e-34	N
rs62197320	2	232060366	G	T	0.292	cg27665808	2	232055229	0.59063	12.889	0.0625	1.48e-34	N
rs200044941	2	232102491	D	R	0.309	cg07929768	2	232055508	0.58988	12.888	0.03325	1.5e-34	N
rs147810982	7	64556563	G	A	0.476	cg12143784	7	64541923	0.54798	12.8682	0.02293	1.85e-34	N
rs149733127	2	232051416	D	R	0.161	cg27665808	2	232055229	0.72982	12.8642	0.07519	1.93e-34	N
rs6730886	2	232051356	A	G	0.161	cg27665808	2	232055229	0.72982	12.8642	0.07519	1.93e-34	N
rs6730987	2	232051388	C	G	0.161	cg27665808	2	232055229	0.72982	12.8642	0.07519	1.93e-34	N
rs114684524	2	232047033	T	G	0.164	cg27665808	2	232055229	0.72044	12.8576	0.07687	2.07e-34	N
rs199978190	2	232047034	D	R	0.164	cg27665808	2	232055229	0.72044	12.8576	0.07687	2.07e-34	N
rs35443401	2	232050613	D	R	0.164	cg27665808	2	232055229	0.72043	12.8575	0.07691	2.07e-34	N
rs35527845	2	232050618	A	C	0.164	cg27665808	2	232055229	0.72043	12.8575	0.07691	2.07e-34	N
rs6706471	2	232047028	G	A	0.164	cg27665808	2	232055229	0.72044	12.8576	0.07687	2.07e-34	N
rs6706474	2	232047035	G	A	0.164	cg27665808	2	232055229	0.72044	12.8576	0.07687	2.07e-34	N
rs482461	7	64765176	A	G	0.43	cg12143784	7	64541923	0.56016	12.8327	0.02508	2.7e-34	N
rs116201989	7	64615152	A	G	0.418	cg12143784	7	64541923	0.56647	12.8115	0.02533	3.38e-34	N
rs147245510	2	232117819	I	R	0.339	cg07929768	2	232055508	0.57474	12.8035	0.03199	3.68e-34	N
rs11897387	2	232122576	C	T	0.341	cg07929768	2	232055508	0.5759	12.8013	0.03199	3.76e-34	N
rs12612801	2	232120479	G	A	0.34	cg07929768	2	232055508	0.57468	12.7936	0.03206	4.09e-34	N
rs9679430	2	232122482	G	A	0.34	cg07929768	2	232055508	0.57468	12.7936	0.03206	4.09e-34	N
rs114989661	7	64610245	A	T	0.421	cg12143784	7	64541923	0.56183	12.7863	0.02508	4.42e-34	N
rs199722615	2	232047032	I	R	0.163	cg27665808	2	232055229	0.71761	12.7827	0.07683	4.59e-34	N
rs142420987	7	64623320	T	C	0.421	cg12143784	7	64541923	0.5597	12.7563	0.02475	6.07e-34	N
rs142611306	7	64667586	T	C	0.426	cg12143784	7	64541923	0.55769	12.756	0.02535	6.09e-34	N
rs59435063	16	58012463	G	A	0.211	cg00491255	16	58019984	0.63135	12.7558	0.04965	6.1e-34	N
rs11767924	7	64897303	T	C	0.436	cg12143784	7	64541923	0.54951	12.7525	0.0251	6.32e-34	N
rs12432225	14	104343852	C	A	0.037	cg22994272	14	104346241	1.37401	12.7494	0	6.53e-34	N
rs77258927	14	104346245	T	G	0.037	cg22994272	14	104346241	1.37401	12.7494	0	6.53e-34	N
rs77690328	14	104355874	C	G	0.037	cg22994272	14	104346241	1.37401	12.7494	0	6.53e-34	N
rs77913665	14	104344722	C	G	0.037	cg22994272	14	104346241	1.37401	12.7494	0	6.53e-34	N
rs79248025	14	104346118	A	G	0.037	cg22994272	14	104346241	1.37401	12.7494	0	6.53e-34	N
rs79593551	14	104344736	T	C	0.037	cg22994272	14	104346241	1.37401	12.7494	0	6.53e-34	N
rs13222390	7	64748600	A	G	0.353	cg12143784	7	64541923	0.59034	12.7449	0.02919	6.84e-34	N
rs10169827	2	232049722	G	A	0.316	cg07929768	2	232055508	0.57466	12.7447	0.03107	6.86e-34	N
rs10179264	2	232050603	C	G	0.316	cg07929768	2	232055508	0.57466	12.7447	0.03107	6.86e-34	N
rs10202608	2	232050653	G	A	0.316	cg07929768	2	232055508	0.57466	12.7447	0.03107	6.86e-34	N
rs10202782	2	232050796	G	A	0.316	cg07929768	2	232055508	0.57466	12.7447	0.03107	6.86e-34	N
rs10202806	2	232050852	G	A	0.316	cg07929768	2	232055508	0.57466	12.7447	0.03107	6.86e-34	N
rs10206322	2	232050072	C	T	0.316	cg07929768	2	232055508	0.57466	12.7447	0.03107	6.86e-34	N
rs6727962	2	232045268	A	G	0.316	cg07929768	2	232055508	0.57466	12.7447	0.03107	6.86e-34	N
rs6755467	2	232044684	C	A	0.316	cg07929768	2	232055508	0.57466	12.7447	0.03107	6.86e-34	N
rs13418346	2	232132374	A	G	0.339	cg07929768	2	232055508	0.57217	12.7339	0.03199	7.69e-34	N
rs13240722	7	64719333	T	A	0.422	cg12143784	7	64541923	0.55582	12.7339	0.02551	7.69e-34	N
rs10234467	7	64681511	G	A	0.448	cg12143784	7	64541923	0.5459	12.7338	0.02434	7.7e-34	N
rs10250191	7	64684528	C	T	0.448	cg12143784	7	64541923	0.5459	12.7338	0.02434	7.7e-34	N
rs12534142	7	64680883	A	G	0.448	cg12143784	7	64541923	0.5459	12.7338	0.02434	7.7e-34	N
rs28877001	7	64684073	T	C	0.448	cg12143784	7	64541923	0.5459	12.7338	0.02434	7.7e-34	N
rs4718200	7	64683848	G	A	0.448	cg12143784	7	64541923	0.5459	12.7338	0.02434	7.7e-34	N
rs5884553	7	64677052	D	R	0.448	cg12143784	7	64541923	0.5459	12.7338	0.02434	7.7e-34	N
rs141381174	7	64895755	D	R	0.443	cg12143784	7	64541923	0.547	12.7284	0.02512	8.15e-34	N
rs199792351	7	64895554	D	R	0.443	cg12143784	7	64541923	0.547	12.7284	0.02512	8.15e-34	N
rs2116213	7	64893890	A	G	0.443	cg12143784	7	64541923	0.547	12.7284	0.02512	8.15e-34	N
rs2116214	7	64893877	A	G	0.443	cg12143784	7	64541923	0.547	12.7284	0.02512	8.15e-34	N
rs12612219	2	232107363	T	G	0.206	cg27665808	2	232055229	0.66111	12.7173	0.07231	9.16e-34	N
rs7569597	2	232102754	A	G	0.206	cg27665808	2	232055229	0.66111	12.7173	0.07231	9.16e-34	N
rs10085516	7	64892398	C	T	0.438	cg12143784	7	64541923	0.5455	12.703	0.02539	1.07e-33	N
rs10085517	7	64892404	C	T	0.438	cg12143784	7	64541923	0.5455	12.703	0.02539	1.07e-33	N
rs10263070	7	64893686	T	C	0.438	cg12143784	7	64541923	0.5455	12.703	0.02539	1.07e-33	N
rs10263082	7	64893716	T	C	0.438	cg12143784	7	64541923	0.5455	12.703	0.02539	1.07e-33	N
rs10664602	7	64895562	I	R	0.438	cg12143784	7	64541923	0.5455	12.703	0.02539	1.07e-33	N
rs13234392	7	64895354	A	G	0.438	cg12143784	7	64541923	0.5455	12.703	0.02539	1.07e-33	N
rs200431823	7	64895664	I	R	0.438	cg12143784	7	64541923	0.5455	12.703	0.02539	1.07e-33	N
rs2419785	7	64892211	G	A	0.438	cg12143784	7	64541923	0.5455	12.703	0.02539	1.07e-33	N
rs2419786	7	64894282	G	A	0.438	cg12143784	7	64541923	0.5455	12.703	0.02539	1.07e-33	N
rs2419789	7	64894471	G	A	0.438	cg12143784	7	64541923	0.5455	12.703	0.02539	1.07e-33	N
rs2900982	7	64894175	C	T	0.438	cg12143784	7	64541923	0.5455	12.703	0.02539	1.07e-33	N
rs35659635	7	64888700	D	R	0.438	cg12143784	7	64541923	0.5455	12.703	0.02539	1.07e-33	N
rs4717251	7	64895494	C	T	0.438	cg12143784	7	64541923	0.5455	12.703	0.02539	1.07e-33	N
rs4717253	7	64895619	A	G	0.438	cg12143784	7	64541923	0.5455	12.703	0.02539	1.07e-33	N
rs4717254	7	64895823	T	C	0.438	cg12143784	7	64541923	0.5455	12.703	0.02539	1.07e-33	N
rs4717255	7	64895860	A	T	0.438	cg12143784	7	64541923	0.5455	12.703	0.02539	1.07e-33	N
rs4718239	7	64895799	G	A	0.438	cg12143784	7	64541923	0.5455	12.703	0.02539	1.07e-33	N
rs4718240	7	64896291	C	G	0.438	cg12143784	7	64541923	0.5455	12.703	0.02539	1.07e-33	N
rs6460246	7	64891419	T	A	0.438	cg12143784	7	64541923	0.5455	12.703	0.02539	1.07e-33	N
rs6460247	7	64891534	C	T	0.438	cg12143784	7	64541923	0.5455	12.703	0.02539	1.07e-33	N
rs6460248	7	64891546	A	G	0.438	cg12143784	7	64541923	0.5455	12.703	0.02539	1.07e-33	N
rs6956631	7	64894697	A	G	0.438	cg12143784	7	64541923	0.5455	12.703	0.02539	1.07e-33	N
rs71569626	7	64889244	D	R	0.438	cg12143784	7	64541923	0.5455	12.703	0.02539	1.07e-33	N
rs7779837	7	64892878	A	G	0.438	cg12143784	7	64541923	0.5455	12.703	0.02539	1.07e-33	N
rs7788253	7	64893470	T	C	0.438	cg12143784	7	64541923	0.5455	12.703	0.02539	1.07e-33	N
rs7796097	7	64892837	G	T	0.438	cg12143784	7	64541923	0.5455	12.703	0.02539	1.07e-33	N
rs7809513	7	64890954	T	A	0.438	cg12143784	7	64541923	0.5455	12.703	0.02539	1.07e-33	N
rs7811535	7	64895269	C	T	0.438	cg12143784	7	64541923	0.5455	12.703	0.02539	1.07e-33	N
rs34000658	7	64892516	A	G	0.444	cg12143784	7	64541923	0.54864	12.7005	0.02506	1.1e-33	N
rs34056184	7	64892514	A	G	0.444	cg12143784	7	64541923	0.54864	12.7005	0.02506	1.1e-33	N
rs4377838	7	64974010	C	T	0.478	cg12143784	7	64541923	0.55297	12.6995	0.02508	1.11e-33	N
rs7795381	7	64721943	T	C	0.422	cg12143784	7	64541923	0.55291	12.696	0.0254	1.15e-33	N
rs7797915	7	64895213	T	C	0.44	cg12143784	7	64541923	0.54528	12.6915	0.02536	1.2e-33	N
rs10173555	2	232108769	G	C	0.206	cg27665808	2	232055229	0.6594	12.6839	0.07231	1.3e-33	N
rs10177091	2	232109889	T	C	0.206	cg27665808	2	232055229	0.6594	12.6839	0.07231	1.3e-33	N
rs72983683	2	232100970	T	G	0.205	cg27665808	2	232055229	0.66287	12.6813	0.07465	1.34e-33	N
rs11977907	7	64685676	G	T	0.448	cg12143784	7	64541923	0.54342	12.6801	0.02432	1.36e-33	N
rs13229781	7	64720305	A	G	0.422	cg12143784	7	64541923	0.55006	12.6591	0.02533	1.7e-33	N
rs34426876	7	64719859	G	A	0.422	cg12143784	7	64541923	0.54956	12.6451	0.02533	1.96e-33	N
rs13418595	2	232126597	A	G	0.206	cg27665808	2	232055229	0.66022	12.6393	0.07465	2.09e-33	N
rs202182312	7	64748588	I	R	0.354	cg12143784	7	64541923	0.58612	12.6253	0.02919	2.42e-33	N
rs71535613	7	64718682	T	C	0.42	cg12143784	7	64541923	0.55178	12.6233	0.02534	2.47e-33	N
rs12463656	2	232036396	A	G	0.161	cg27665808	2	232055229	0.71172	12.6142	0.07676	2.72e-33	N
rs12468767	2	232036843	G	T	0.161	cg27665808	2	232055229	0.71172	12.6142	0.07676	2.72e-33	N
rs13394402	2	231968920	T	G	0.161	cg27665808	2	232055229	0.71172	12.6142	0.07676	2.72e-33	N
rs13402242	2	232029568	G	A	0.161	cg27665808	2	232055229	0.71172	12.6142	0.07676	2.72e-33	N
rs62193731	2	232006786	A	G	0.161	cg27665808	2	232055229	0.71172	12.6142	0.07676	2.72e-33	N
rs72983619	2	232004469	A	G	0.161	cg27665808	2	232055229	0.71172	12.6142	0.07676	2.72e-33	N
rs201907117	2	232102487	D	R	0.216	cg07929768	2	232055508	0.63343	12.6119	0.03782	2.79e-33	N
rs7357344	7	64974636	A	G	0.473	cg12143784	7	64541923	0.54816	12.6098	0.02495	2.85e-33	N
rs13222391	7	64748601	C	G	0.352	cg12143784	7	64541923	0.58438	12.6089	0.02919	2.87e-33	N
rs6437004	2	232051465	G	T	0.319	cg07929768	2	232055508	0.5705	12.5956	0.03092	3.3e-33	N
rs12051014	16	58011143	A	G	0.209	cg00491255	16	58019984	0.62514	12.5901	0.04963	3.5e-33	N
rs4583232	16	58011450	T	C	0.209	cg00491255	16	58019984	0.62514	12.5901	0.04963	3.5e-33	N
rs7186881	16	58009076	A	G	0.209	cg00491255	16	58019984	0.62514	12.5901	0.04963	3.5e-33	N
rs6724181	2	232044654	A	G	0.162	cg27665808	2	232055229	0.7098	12.5869	0.07683	3.62e-33	N
rs6974762	7	64894599	C	T	0.439	cg12143784	7	64541923	0.54213	12.5775	0.02535	4e-33	N
rs7604042	2	232135541	T	A	0.336	cg07929768	2	232055508	0.56455	12.561	0.03138	4.76e-33	N
rs11879637	19	50307408	A	G	0.436	cg10751382	19	50391554	0.50638	12.5515	0.12715	5.25e-33	N
rs150041516	7	64718586	T	C	0.419	cg12143784	7	64541923	0.54646	12.5468	0.02508	5.51e-33	N
rs4717256	7	64895916	C	G	0.443	cg12143784	7	64541923	0.53686	12.5402	0.02416	5.91e-33	N
rs200234759	7	64893232	D	R	0.435	cg12143784	7	64541923	0.53891	12.5375	0.02536	6.08e-33	N
rs201705218	7	64893237	I	R	0.435	cg12143784	7	64541923	0.53891	12.5375	0.02536	6.08e-33	N
rs7800287	7	64893237	G	A	0.435	cg12143784	7	64541923	0.53891	12.5375	0.02536	6.08e-33	N
rs7801386	7	64893233	C	G	0.435	cg12143784	7	64541923	0.53891	12.5375	0.02536	6.08e-33	N
rs7796045	7	64767609	A	G	0.377	cg12143784	7	64541923	0.56121	12.5307	0.02833	6.53e-33	N
rs201907117	2	232102487	D	R	0.216	cg27665808	2	232055229	0.63349	12.527	0.06717	6.79e-33	N
rs8104825	19	50315423	A	G	0.435	cg10751382	19	50391554	0.50566	12.5199	0.12688	7.31e-33	N
rs2801943	10	42947627	C	T	0.425	cg04395798	10	42971732	0.52759	12.5174	0.03739	7.51e-33	N
rs2801019	10	42955993	A	T	0.341	cg04395798	10	42971732	0.54017	12.5138	0.03833	7.79e-33	N
rs4018034	2	232142258	I	R	0.247	cg27665808	2	232055229	0.60474	12.5113	0.07652	8e-33	N
rs12471957	2	231993738	T	G	0.16	cg27665808	2	232055229	0.70812	12.5092	0.07666	8.18e-33	N
rs17440378	2	231979355	T	C	0.16	cg27665808	2	232055229	0.70812	12.5092	0.07666	8.18e-33	N
rs1608190	10	42518437	A	C	0.473	cg16633951	10	42971575	-0.52852	-12.5046	0.04932	8.58e-33	N
rs12986369	19	50298117	G	A	0.43	cg10751382	19	50391554	0.50679	12.4857	0.12453	1.05e-32	N
rs55637820	2	231935918	T	C	0.163	cg27665808	2	232055229	0.69687	12.4816	0.07519	1.09e-32	N
rs78890542	2	231930135	A	T	0.163	cg27665808	2	232055229	0.69687	12.4816	0.07519	1.09e-32	N
rs7248071	19	50301844	G	T	0.436	cg10751382	19	50391554	0.50342	12.4777	0.12525	1.14e-32	N
rs7251463	19	50301545	A	G	0.436	cg10751382	19	50391554	0.50342	12.4777	0.12525	1.14e-32	N
rs1589587	10	42512897	C	G	0.474	cg16633951	10	42971575	-0.5281	-12.4748	0.0499	1.17e-32	N
rs2334905	10	42512030	G	A	0.474	cg16633951	10	42971575	-0.5281	-12.4748	0.0499	1.17e-32	N
rs10797137	10	42498727	C	A	0.47	cg16633951	10	42971575	-0.53045	-12.4702	0.05141	1.23e-32	N
rs10908980	10	42508295	T	C	0.47	cg16633951	10	42971575	-0.53045	-12.4702	0.05141	1.23e-32	N
rs10908982	10	42515428	T	G	0.47	cg16633951	10	42971575	-0.53045	-12.4702	0.05141	1.23e-32	N
rs1589588	10	42467985	T	C	0.47	cg16633951	10	42971575	-0.53045	-12.4702	0.05141	1.23e-32	N
rs1818808	10	42509918	T	C	0.47	cg16633951	10	42971575	-0.53045	-12.4702	0.05141	1.23e-32	N
rs9665548	10	42447593	C	G	0.47	cg16633951	10	42971575	-0.53045	-12.4702	0.05141	1.23e-32	N
rs9794047	10	42506274	A	C	0.47	cg16633951	10	42971575	-0.53045	-12.4702	0.05141	1.23e-32	N
rs9794761	10	42497889	T	C	0.47	cg16633951	10	42971575	-0.53045	-12.4702	0.05141	1.23e-32	N
rs62455723	7	64656388	A	G	0.45	cg12143784	7	64541923	0.53617	12.4689	0.02297	1.25e-32	N
rs11592393	10	42909729	C	A	0.338	cg04395798	10	42971732	0.53888	12.4659	0.03803	1.29e-32	N
rs6973539	7	64894603	G	C	0.44	cg12143784	7	64541923	0.53848	12.4604	0.02531	1.36e-32	N
rs71535612	7	64718669	T	C	0.421	cg12143784	7	64541923	0.54515	12.454	0.0253	1.46e-32	N
rs2801950	10	42926905	A	G	0.342	cg04395798	10	42971732	0.5377	12.4375	0.0383	1.73e-32	N
rs2900956	10	42921368	C	T	0.342	cg04395798	10	42971732	0.5377	12.4375	0.0383	1.73e-32	N
rs61854531	10	42883176	T	C	0.342	cg04395798	10	42971732	0.5377	12.4375	0.0383	1.73e-32	N
rs9422463	10	42927094	A	G	0.342	cg04395798	10	42971732	0.5377	12.4375	0.0383	1.73e-32	N
rs12469096	2	231921586	C	G	0.162	cg27665808	2	232055229	0.69532	12.4351	0.07512	1.77e-32	N
rs9665583	10	42610826	G	C	0.459	cg16633951	10	42971575	-0.53373	-12.4298	0.05126	1.87e-32	N
rs11677284	2	113385833	G	A	0.461	cg09133511	2	113384907	-0.38363	-12.4226	0.01061	2.02e-32	N
rs4849084	2	113384747	A	C	0.461	cg09133511	2	113384907	-0.38363	-12.4226	0.01061	2.02e-32	N
rs62158654	2	113385993	G	A	0.461	cg09133511	2	113384907	-0.38363	-12.4226	0.01061	2.02e-32	N
rs6437001	2	232013304	T	G	0.312	cg07929768	2	232055508	0.56168	12.3854	0.03061	2.97e-32	N
rs144004192	7	64615105	A	T	0.419	cg12143784	7	64541923	0.54809	12.3824	0.02454	3.07e-32	N
rs10197001	2	231961582	T	G	0.162	cg27665808	2	232055229	0.69324	12.3773	0.07505	3.23e-32	N
rs12619336	2	231955045	A	C	0.162	cg27665808	2	232055229	0.69324	12.3773	0.07505	3.23e-32	N
rs2161892	2	231965065	A	G	0.162	cg27665808	2	232055229	0.69324	12.3773	0.07505	3.23e-32	N
rs2801021	10	42960401	T	C	0.341	cg04395798	10	42971732	0.53457	12.3656	0.0383	3.65e-32	N
rs9665333	10	42605591	T	A	0.46	cg16633951	10	42971575	-0.53057	-12.3648	0.05113	3.68e-32	N
rs201241726	2	232043668	D	R	0.164	cg27665808	2	232055229	0.6937	12.3557	0.07587	4.05e-32	N
rs9794161	10	42508830	G	T	0.359	cg16633951	10	42971575	0.53495	12.3521	0.05383	4.2e-32	N
rs2671946	7	64564147	A	G	0.488	cg12143784	7	64541923	0.53587	12.3515	0.02339	4.23e-32	N
rs11879607	19	50307344	T	C	0.456	cg10751382	19	50391554	0.49919	12.3481	0.12474	4.38e-32	N
rs35344605	19	50309860	D	R	0.457	cg10751382	19	50391554	0.49928	12.335	0.12385	5.01e-32	N
rs142104717	19	50309615	D	R	0.456	cg10751382	19	50391554	0.49939	12.3313	0.12488	5.21e-32	N
rs200958245	19	50391297	D	R	0.3	cg14071503	19	50391752	0.55851	12.3282	0.05069	5.38e-32	N
rs2305917	19	50391299	T	C	0.3	cg14071503	19	50391752	0.55851	12.3282	0.05069	5.38e-32	N
rs13225680	7	64819455	C	T	0.442	cg12143784	7	64541923	0.5394	12.323	0.02234	5.68e-32	N
rs7251269	19	50301653	G	A	0.457	cg10751382	19	50391554	0.49758	12.3227	0.1246	5.69e-32	N
rs201819848	7	64671823	I	R	0.42	cg12143784	7	64541923	0.54147	12.3136	0.02372	6.26e-32	N
rs10909011	10	42436301	G	A	0.462	cg16633951	10	42971575	-0.52931	-12.3024	0.05039	7.03e-32	N
rs11265994	10	42477634	T	C	0.462	cg16633951	10	42971575	-0.52931	-12.3024	0.05039	7.03e-32	N
rs1608197	10	42497519	A	G	0.462	cg16633951	10	42971575	-0.52931	-12.3024	0.05039	7.03e-32	N
rs9664628	10	42469340	G	C	0.462	cg16633951	10	42971575	-0.52931	-12.3024	0.05039	7.03e-32	N
rs200044941	2	232102491	D	R	0.309	cg27665808	2	232055229	0.57072	12.3	0.06439	7.2e-32	N
rs2201903	10	42427983	T	C	0.464	cg16633951	10	42971575	-0.52893	-12.2978	0.05083	7.37e-32	N
rs10564756	2	232042278	D	R	0.312	cg07929768	2	232055508	0.55832	12.2969	0.03061	7.44e-32	N
rs2303349	2	232030861	G	A	0.312	cg07929768	2	232055508	0.55832	12.2969	0.03061	7.44e-32	N
rs6437003	2	232030301	T	C	0.312	cg07929768	2	232055508	0.55832	12.2969	0.03061	7.44e-32	N
rs9663850	10	42435262	C	A	0.464	cg16633951	10	42971575	-0.52887	-12.2961	0.05083	7.5e-32	N
rs7906463	10	42932885	C	A	0.34	cg04395798	10	42971732	0.53303	12.2892	0.03862	8.06e-32	N
rs61294225	2	231923739	G	A	0.16	cg27665808	2	232055229	0.69016	12.2848	0.07498	8.43e-32	N
rs1025107	2	232034342	T	C	0.313	cg07929768	2	232055508	0.55806	12.2846	0.0307	8.45e-32	N
rs2032953	2	232035793	T	C	0.313	cg07929768	2	232055508	0.55806	12.2846	0.0307	8.45e-32	N
rs2303350	2	232030555	A	G	0.313	cg07929768	2	232055508	0.55806	12.2846	0.0307	8.45e-32	N
rs2303351	2	232030510	A	C	0.313	cg07929768	2	232055508	0.55806	12.2846	0.0307	8.45e-32	N
rs6749	2	232035429	A	G	0.313	cg07929768	2	232055508	0.55806	12.2846	0.0307	8.45e-32	N
rs1709474	7	64561863	C	T	0.494	cg12143784	7	64541923	0.53748	12.2809	0.02309	8.78e-32	N
rs9702537	10	42460912	G	T	0.479	cg16633951	10	42971575	-0.51993	-12.2799	0.04938	8.87e-32	N
rs11893395	2	232022981	A	G	0.313	cg07929768	2	232055508	0.55731	12.2647	0.03052	1.04e-31	N
rs4350740	2	232018979	G	C	0.313	cg07929768	2	232055508	0.55731	12.2647	0.03052	1.04e-31	N
rs6437000	2	231977527	A	C	0.288	cg07929768	2	232055508	0.56869	12.2601	0.03279	1.09e-31	N
rs59299060	7	64819445	C	T	0.443	cg12143784	7	64541923	0.53802	12.2546	0.02183	1.15e-31	N
rs62469467	7	64819450	C	T	0.443	cg12143784	7	64541923	0.53802	12.2546	0.02183	1.15e-31	N
rs1035620	2	232008305	T	C	0.313	cg07929768	2	232055508	0.55705	12.2524	0.03061	1.18e-31	N
rs35113044	2	232020221	D	R	0.313	cg07929768	2	232055508	0.55705	12.2524	0.03061	1.18e-31	N
rs3754981	2	231996955	C	A	0.313	cg07929768	2	232055508	0.55705	12.2524	0.03061	1.18e-31	N
rs3769989	2	232011440	A	C	0.313	cg07929768	2	232055508	0.55705	12.2524	0.03061	1.18e-31	N
rs6706191	2	232040047	G	T	0.313	cg07929768	2	232055508	0.55705	12.2524	0.03061	1.18e-31	N
rs7565408	2	231996576	A	G	0.313	cg07929768	2	232055508	0.55705	12.2524	0.03061	1.18e-31	N
rs7585887	2	232006922	T	C	0.313	cg07929768	2	232055508	0.55705	12.2524	0.03061	1.18e-31	N
rs147893573	7	64974178	T	C	0.468	cg12143784	7	64541923	0.54086	12.2464	0.02321	1.25e-31	N
rs11266155	10	42422535	C	G	0.462	cg16633951	10	42971575	-0.5244	-12.2453	0.04978	1.27e-31	N
rs2801019	10	42955993	A	T	0.341	cg16633951	10	42971575	0.53052	12.2354	0.05331	1.4e-31	N
rs1709473	7	64560902	C	T	0.495	cg12143784	7	64541923	0.5363	12.2291	0.02308	1.5e-31	N
rs9664345	10	42465390	C	G	0.476	cg16633951	10	42971575	-0.51987	-12.2289	0.04975	1.5e-31	N
rs7905348	10	42607955	T	G	0.45	cg16633951	10	42971575	-0.52488	-12.2272	0.04998	1.53e-31	N
rs7908581	10	42607956	T	C	0.45	cg16633951	10	42971575	-0.52488	-12.2272	0.04998	1.53e-31	N
rs7603942	2	231957261	A	C	0.314	cg07929768	2	232055508	0.55441	12.2235	0.0305	1.59e-31	N
rs7604219	2	231957324	A	G	0.314	cg07929768	2	232055508	0.55441	12.2235	0.0305	1.59e-31	N
rs6707708	2	232020821	C	T	0.314	cg07929768	2	232055508	0.55415	12.2168	0.03072	1.7e-31	N
rs2801024	10	42970985	A	T	0.335	cg16633951	10	42971575	0.5327	12.2167	0.05285	1.7e-31	N
rs2801952	10	42970984	C	T	0.335	cg16633951	10	42971575	0.5327	12.2167	0.05285	1.7e-31	N
rs12617646	2	231923053	T	C	0.315	cg07929768	2	232055508	0.55103	12.2147	0.02968	1.74e-31	N
rs13416929	2	231931216	A	G	0.315	cg07929768	2	232055508	0.55103	12.2147	0.02968	1.74e-31	N
rs2161891	2	231954091	G	A	0.315	cg07929768	2	232055508	0.55103	12.2147	0.02968	1.74e-31	N
rs2303357	2	231949946	A	G	0.315	cg07929768	2	232055508	0.55103	12.2147	0.02968	1.74e-31	N
rs35167435	2	231929630	D	R	0.315	cg07929768	2	232055508	0.55103	12.2147	0.02968	1.74e-31	N
rs3815844	2	231927569	T	G	0.315	cg07929768	2	232055508	0.55103	12.2147	0.02968	1.74e-31	N
rs6746156	2	231967210	G	A	0.315	cg07929768	2	232055508	0.55103	12.2147	0.02968	1.74e-31	N
rs7581418	2	231930566	A	G	0.315	cg07929768	2	232055508	0.55103	12.2147	0.02968	1.74e-31	N
rs10908953	10	42458955	T	C	0.476	cg16633951	10	42971575	-0.51856	-12.2132	0.04959	1.77e-31	N
rs1119185	10	42459430	T	C	0.476	cg16633951	10	42971575	-0.51856	-12.2132	0.04959	1.77e-31	N
rs1119186	10	42459493	T	C	0.476	cg16633951	10	42971575	-0.51856	-12.2132	0.04959	1.77e-31	N
rs11265983	10	42467165	T	C	0.476	cg16633951	10	42971575	-0.51856	-12.2132	0.04959	1.77e-31	N
rs11499333	10	42463659	A	T	0.476	cg16633951	10	42971575	-0.51856	-12.2132	0.04959	1.77e-31	N
rs11499334	10	42463680	A	G	0.476	cg16633951	10	42971575	-0.51856	-12.2132	0.04959	1.77e-31	N
rs11528793	10	42461954	G	A	0.476	cg16633951	10	42971575	-0.51856	-12.2132	0.04959	1.77e-31	N
rs1603831	10	42462848	A	G	0.476	cg16633951	10	42971575	-0.51856	-12.2132	0.04959	1.77e-31	N
rs1846408	10	42463062	T	C	0.476	cg16633951	10	42971575	-0.51856	-12.2132	0.04959	1.77e-31	N
rs1851485	10	42468312	C	G	0.476	cg16633951	10	42971575	-0.51856	-12.2132	0.04959	1.77e-31	N
rs9663778	10	42504591	T	G	0.476	cg16633951	10	42971575	-0.51856	-12.2132	0.04959	1.77e-31	N
rs1608194	10	42471859	A	G	0.463	cg16633951	10	42971575	-0.52507	-12.2075	0.05024	1.87e-31	N
rs10430806	10	42522198	T	C	0.468	cg16633951	10	42971575	-0.52361	-12.2062	0.04932	1.9e-31	N
rs10199752	2	231969554	C	A	0.314	cg07929768	2	232055508	0.55373	12.2057	0.0305	1.91e-31	N
rs60440887	2	231968815	I	R	0.314	cg07929768	2	232055508	0.55373	12.2057	0.0305	1.91e-31	N
rs12694886	2	231923559	C	T	0.316	cg07929768	2	232055508	0.5508	12.2027	0.02977	1.97e-31	N
rs13411316	2	231948801	A	G	0.316	cg07929768	2	232055508	0.5508	12.2027	0.02977	1.97e-31	N
rs13430145	2	231931133	C	T	0.316	cg07929768	2	232055508	0.5508	12.2027	0.02977	1.97e-31	N
rs2007131	2	231947432	A	C	0.316	cg07929768	2	232055508	0.5508	12.2027	0.02977	1.97e-31	N
rs2288147	2	231937505	G	A	0.316	cg07929768	2	232055508	0.5508	12.2027	0.02977	1.97e-31	N
rs3769990	2	231927665	A	G	0.316	cg07929768	2	232055508	0.5508	12.2027	0.02977	1.97e-31	N
rs60563689	2	231940592	G	A	0.316	cg07929768	2	232055508	0.5508	12.2027	0.02977	1.97e-31	N
rs6741145	2	231941252	G	A	0.316	cg07929768	2	232055508	0.5508	12.2027	0.02977	1.97e-31	N
rs7595464	2	231967610	G	A	0.316	cg07929768	2	232055508	0.5508	12.2027	0.02977	1.97e-31	N
rs906879	2	231948178	G	A	0.316	cg07929768	2	232055508	0.5508	12.2027	0.02977	1.97e-31	N
rs139649430	10	42427814	D	R	0.469	cg16633951	10	42971575	-0.5233	-12.2025	0.04928	1.97e-31	N
rs9664985	10	42428682	G	A	0.469	cg16633951	10	42971575	-0.5233	-12.2025	0.04928	1.97e-31	N
rs7606037	2	232054576	C	T	0.336	cg27665808	2	232055229	0.55422	12.2021	0.06309	1.98e-31	N
rs143538253	10	42437833	C	A	0.463	cg16633951	10	42971575	-0.52476	-12.1988	0.05024	2.05e-31	N
rs2801021	10	42960401	T	C	0.341	cg16633951	10	42971575	0.52875	12.1941	0.05321	2.15e-31	N
rs7905461	10	42608040	C	G	0.449	cg16633951	10	42971575	-0.52304	-12.1917	0.0499	2.2e-31	N
rs7905474	10	42608071	T	G	0.449	cg16633951	10	42971575	-0.52304	-12.1917	0.0499	2.2e-31	N
rs7905476	10	42608072	T	G	0.449	cg16633951	10	42971575	-0.52304	-12.1917	0.0499	2.2e-31	N
rs11266145	10	42410762	A	G	0.465	cg16633951	10	42971575	-0.52548	-12.1905	0.05036	2.23e-31	N
rs9664757	10	42489266	T	G	0.464	cg16633951	10	42971575	-0.52642	-12.1881	0.05039	2.29e-31	N
rs9794037	10	42417750	T	C	0.467	cg16633951	10	42971575	-0.5249	-12.1802	0.05049	2.48e-31	N
rs2801950	10	42926905	A	G	0.342	cg16633951	10	42971575	0.52869	12.1778	0.05321	2.54e-31	N
rs2900956	10	42921368	C	T	0.342	cg16633951	10	42971575	0.52869	12.1778	0.05321	2.54e-31	N
rs61854531	10	42883176	T	C	0.342	cg16633951	10	42971575	0.52869	12.1778	0.05321	2.54e-31	N
rs9422463	10	42927094	A	G	0.342	cg16633951	10	42971575	0.52869	12.1778	0.05321	2.54e-31	N
rs189869033	10	42440313	C	T	0.464	cg16633951	10	42971575	-0.52455	-12.1594	0.05024	3.07e-31	N
rs3739162	19	50371093	D	R	0.302	cg14071503	19	50391752	0.55381	12.1431	0.05225	3.63e-31	N
rs10498257	2	231993038	T	A	0.312	cg07929768	2	232055508	0.55404	12.1382	0.03063	3.81e-31	N
rs59886388	2	231995770	C	G	0.312	cg07929768	2	232055508	0.55404	12.1382	0.03063	3.81e-31	N
rs7607338	2	231987955	A	C	0.312	cg07929768	2	232055508	0.55404	12.1382	0.03063	3.81e-31	N
rs765458	2	231990667	A	G	0.312	cg07929768	2	232055508	0.55404	12.1382	0.03063	3.81e-31	N
rs9732766	10	42489708	T	C	0.463	cg16633951	10	42971575	-0.52239	-12.1332	0.05024	4.01e-31	N
rs2801024	10	42970985	A	T	0.335	cg04395798	10	42971732	0.52914	12.1298	0.03932	4.16e-31	N
rs2801952	10	42970984	C	T	0.335	cg04395798	10	42971732	0.52914	12.1298	0.03932	4.16e-31	N
rs12269267	10	42434410	A	G	0.464	cg16633951	10	42971575	-0.52202	-12.1288	0.05036	4.2e-31	N
rs12355221	10	42443348	T	C	0.47	cg16633951	10	42971575	-0.52044	-12.1279	0.049	4.24e-31	N
rs3028799	10	42461271	I	R	0.472	cg16633951	10	42971575	-0.51617	-12.1127	0.04851	4.95e-31	N
rs2175147	2	232008473	G	A	0.316	cg07929768	2	232055508	0.54908	12.1123	0.0305	4.98e-31	N
rs59233401	2	231908882	D	R	0.16	cg07929768	2	232055508	0.69013	12.1102	0.05573	5.08e-31	N
rs6436996	2	231907978	C	A	0.16	cg07929768	2	232055508	0.69013	12.1102	0.05573	5.08e-31	N
rs6854	2	231913395	T	G	0.16	cg07929768	2	232055508	0.69013	12.1102	0.05573	5.08e-31	N
rs13411148	2	231918754	T	C	0.165	cg27665808	2	232055229	0.67362	12.1024	0.07594	5.51e-31	N
rs11522553	10	42511466	A	G	0.408	cg16633951	10	42971575	0.51463	12.0982	0.05516	5.75e-31	N
rs11523417	10	42511467	T	G	0.408	cg16633951	10	42971575	0.51463	12.0982	0.05516	5.75e-31	N
rs11524383	10	42511329	C	A	0.408	cg16633951	10	42971575	0.51463	12.0982	0.05516	5.75e-31	N
rs9702080	10	42507160	G	C	0.408	cg16633951	10	42971575	0.51463	12.0982	0.05516	5.75e-31	N
rs28498916	10	42606880	C	G	0.46	cg16633951	10	42971575	-0.52431	-12.0949	0.05081	5.95e-31	N
rs1851490	10	42456692	G	C	0.47	cg16633951	10	42971575	-0.51856	-12.0929	0.049	6.07e-31	N
rs1549339	2	231982826	A	G	0.312	cg07929768	2	232055508	0.55223	12.0911	0.03051	6.18e-31	N
rs7786206	7	65063274	C	T	0.449	cg12143784	7	64541923	0.5259	12.0897	0.02437	6.27e-31	N
rs6437005	2	232055735	G	A	0.335	cg27665808	2	232055229	0.55107	12.089	0.06161	6.32e-31	N
rs722040	2	231955545	T	C	0.314	cg07929768	2	232055508	0.54776	12.0888	0.03009	6.33e-31	N
rs7581188	2	231958192	G	A	0.314	cg07929768	2	232055508	0.54776	12.0888	0.03009	6.33e-31	N
rs7906463	10	42932885	C	A	0.34	cg16633951	10	42971575	0.52569	12.0771	0.05339	7.13e-31	N
rs141418327	7	64947781	A	G	0.462	cg12143784	7	64541923	0.54234	12.0666	0.02531	7.94e-31	N
rs11524826	10	42504851	C	A	0.409	cg16633951	10	42971575	0.51263	12.0565	0.05548	8.8e-31	N
rs1608191	10	42515104	T	A	0.409	cg16633951	10	42971575	0.51263	12.0565	0.05548	8.8e-31	N
rs1608192	10	42514955	C	T	0.409	cg16633951	10	42971575	0.51263	12.0565	0.05548	8.8e-31	N
rs2204159	10	42514488	G	C	0.409	cg16633951	10	42971575	0.51263	12.0565	0.05548	8.8e-31	N
rs9732495	10	42483018	G	T	0.409	cg16633951	10	42971575	0.51263	12.0565	0.05548	8.8e-31	N
rs3729641	19	50368116	A	C	0.222	cg10751382	19	50391554	0.58838	12.0547	0.15485	8.96e-31	N
rs7780836	7	64786351	T	C	0.461	cg12143784	7	64541923	0.53648	12.0515	0.02499	9.27e-31	N
rs2419679	10	42892346	C	T	0.37	cg04395798	10	42971732	0.51846	12.0444	0.03867	9.95e-31	N
rs4448638	10	42931151	A	G	0.37	cg04395798	10	42971732	0.51846	12.0444	0.03867	9.95e-31	N
rs10908961	10	42469894	A	G	0.468	cg16633951	10	42971575	-0.51679	-12.039	0.04916	1.05e-30	N
rs9665476	10	42492751	A	T	0.468	cg16633951	10	42971575	-0.51679	-12.039	0.04916	1.05e-30	N
rs11592393	10	42909729	C	A	0.338	cg16633951	10	42971575	0.52367	12.0361	0.05285	1.08e-30	N
rs1255375	10	42993900	T	C	0.415	cg16633951	10	42971575	0.50878	12.0307	0.04891	1.14e-30	N
rs58557553	10	42491288	I	R	0.469	cg16633951	10	42971575	-0.51681	-12.0225	0.04916	1.24e-30	N
rs6437008	2	232091948	G	C	0.337	cg27665808	2	232055229	0.54412	12.0189	0.05878	1.29e-30	N
rs143862812	10	42486481	T	G	0.409	cg16633951	10	42971575	0.51435	12.0165	0.05419	1.32e-30	N
rs199729767	10	42514325	I	R	0.409	cg16633951	10	42971575	0.51078	12.0166	0.055	1.32e-30	N
rs2204160	10	42514325	C	A	0.409	cg16633951	10	42971575	0.51078	12.0166	0.055	1.32e-30	N
rs10418141	19	50360046	A	C	0.313	cg10751382	19	50391554	0.523	12.0047	0.13023	1.49e-30	N
rs62193694	2	231907054	T	C	0.163	cg07929768	2	232055508	0.68522	12.0023	0.06251	1.53e-30	N
rs62193695	2	231918203	T	A	0.164	cg27665808	2	232055229	0.67424	11.999	0.07411	1.58e-30	N
rs9663696	10	42441942	G	C	0.468	cg16633951	10	42971575	-0.51522	-11.9956	0.04853	1.64e-30	N
rs2878326	10	42442438	T	G	0.399	cg16633951	10	42971575	0.52113	11.9918	0.05409	1.7e-30	N
rs7908559	10	42607909	T	C	0.462	cg16633951	10	42971575	-0.51868	-11.9858	0.05054	1.81e-30	N
rs2801943	10	42947627	C	T	0.425	cg16633951	10	42971575	0.50873	11.9743	0.04768	2.03e-30	N
rs3731783	2	231913056	T	C	0.16	cg07929768	2	232055508	0.68359	11.974	0.05573	2.04e-30	N
rs10231454	7	64965305	T	G	0.458	cg12143784	7	64541923	0.54193	11.9687	0.02508	2.15e-30	N
rs10254584	7	65049348	C	A	0.439	cg12143784	7	64541923	0.52309	11.968	0.02446	2.17e-30	N
rs13411443	2	231918871	C	G	0.167	cg27665808	2	232055229	0.66587	11.9608	0.07458	2.33e-30	N
rs12785114	10	42887696	C	T	0.365	cg04395798	10	42971732	0.5151	11.9473	0.03759	2.67e-30	N
rs9663150	10	42442071	T	C	0.498	cg04395798	10	42971732	-0.51555	-11.9419	0.0342	2.82e-30	N
rs10219002	10	42420057	G	C	0.456	cg16633951	10	42971575	-0.51773	-11.9339	0.05049	3.06e-30	N
rs7918771	10	42608215	A	T	0.459	cg16633951	10	42971575	-0.51386	-11.9341	0.05024	3.06e-30	N
rs199561307	19	50402818	D	R	0.372	cg10751382	19	50391554	-0.50128	-11.9323	0.09696	3.11e-30	N
rs2878326	10	42442438	T	G	0.399	cg04395798	10	42971732	0.51855	11.9316	0.0344	3.13e-30	N
rs2305918	19	50315773	A	T	0.461	cg14071503	19	50391752	0.49001	11.9222	0.04967	3.45e-30	N
rs493064	7	64767767	C	G	0.462	cg12143784	7	64541923	0.53277	11.9187	0.02514	3.57e-30	N
rs113036312	14	104332089	T	C	0.033	cg22994272	14	104346241	1.36467	11.9187	0	3.57e-30	N
rs11672587	19	50352900	A	T	0.316	cg10751382	19	50391554	0.51708	11.9122	0.13011	3.82e-30	N
rs11524826	10	42504851	C	A	0.409	cg04395798	10	42971732	0.50689	11.9068	0.03579	4.03e-30	N
rs1608191	10	42515104	T	A	0.409	cg04395798	10	42971732	0.50689	11.9068	0.03579	4.03e-30	N
rs1608192	10	42514955	C	T	0.409	cg04395798	10	42971732	0.50689	11.9068	0.03579	4.03e-30	N
rs2204159	10	42514488	G	C	0.409	cg04395798	10	42971732	0.50689	11.9068	0.03579	4.03e-30	N
rs9732495	10	42483018	G	T	0.409	cg04395798	10	42971732	0.50689	11.9068	0.03579	4.03e-30	N
rs10269825	7	64739577	C	T	0.459	cg12143784	7	64541923	0.53097	11.898	0.0248	4.4e-30	N
rs4717245	7	64757551	T	A	0.459	cg12143784	7	64541923	0.53097	11.898	0.0248	4.4e-30	N
rs9638427	7	64762034	G	A	0.459	cg12143784	7	64541923	0.53097	11.898	0.0248	4.4e-30	N
rs139916550	7	64771606	D	R	0.461	cg12143784	7	64541923	0.52964	11.8927	0.02493	4.65e-30	N
rs1937986	10	42951476	G	A	0.368	cg04395798	10	42971732	0.5119	11.8912	0.03867	4.72e-30	N
rs2022855	10	42946535	A	G	0.368	cg04395798	10	42971732	0.5119	11.8912	0.03867	4.72e-30	N
rs2801017	10	42952657	C	G	0.368	cg04395798	10	42971732	0.5119	11.8912	0.03867	4.72e-30	N
rs7074992	10	42619450	A	G	0.438	cg16633951	10	42971575	-0.52237	-11.8891	0.05102	4.82e-30	N
rs11676691	2	113388397	A	G	0.451	cg09133511	2	113384907	-0.37366	-11.8888	0.01004	4.84e-30	N
rs2278836	19	50358183	A	C	0.312	cg10751382	19	50391554	0.51788	11.8847	0.12931	5.04e-30	N
rs9924293	16	58017839	C	G	0.153	cg00491255	16	58019984	-0.69506	-11.8817	0.0455	5.2e-30	N
rs9794218	10	42474871	T	G	0.461	cg16633951	10	42971575	-0.50941	-11.8779	0.04875	5.4e-30	N
rs147201097	7	64790039	D	R	0.462	cg12143784	7	64541923	0.52958	11.8744	0.02492	5.59e-30	N
rs200091610	7	64790038	D	R	0.462	cg12143784	7	64541923	0.52958	11.8744	0.02492	5.59e-30	N
rs200378263	7	64780391	D	R	0.462	cg12143784	7	64541923	0.52958	11.8744	0.02492	5.59e-30	N
rs34656581	7	64780389	D	R	0.462	cg12143784	7	64541923	0.52958	11.8744	0.02492	5.59e-30	N
rs62472191	7	64783013	C	T	0.462	cg12143784	7	64541923	0.52958	11.8744	0.02492	5.59e-30	N
rs6963801	7	64782426	T	C	0.462	cg12143784	7	64541923	0.52958	11.8744	0.02492	5.59e-30	N
rs7792389	7	64781867	T	C	0.462	cg12143784	7	64541923	0.52958	11.8744	0.02492	5.59e-30	N
rs199729767	10	42514325	I	R	0.409	cg04395798	10	42971732	0.50525	11.8728	0.03561	5.68e-30	N
rs2204160	10	42514325	C	A	0.409	cg04395798	10	42971732	0.50525	11.8728	0.03561	5.68e-30	N
rs2335068	10	42427074	A	C	0.455	cg16633951	10	42971575	-0.51172	-11.8707	0.04937	5.8e-30	N
rs1255401	10	42975170	T	C	0.328	cg16633951	10	42971575	0.52265	11.8693	0.04793	5.89e-30	N
rs9702520	10	42512697	T	C	0.482	cg16633951	10	42971575	0.51377	11.8679	0.05248	5.98e-30	N
rs11239366	10	42901588	A	G	0.369	cg04395798	10	42971732	0.51156	11.8638	0.03867	6.23e-30	N
rs2419673	10	42930394	G	T	0.369	cg04395798	10	42971732	0.51156	11.8638	0.03867	6.23e-30	N
rs4948682	10	42916042	C	T	0.369	cg04395798	10	42971732	0.51156	11.8638	0.03867	6.23e-30	N
rs75852591	10	42898693	T	C	0.369	cg04395798	10	42971732	0.51156	11.8638	0.03867	6.23e-30	N
rs10421561	19	50304392	C	T	0.464	cg14071503	19	50391752	0.48923	11.8607	0.04861	6.43e-30	N
rs10421754	19	50304439	C	T	0.464	cg14071503	19	50391752	0.48923	11.8607	0.04861	6.43e-30	N
rs11765030	7	64768219	C	T	0.46	cg12143784	7	64541923	0.52853	11.8568	0.02486	6.68e-30	N
rs7779435	7	64718498	C	T	0.464	cg12143784	7	64541923	0.51177	11.8523	0.02302	6.99e-30	N
rs2915386	7	64967204	G	A	0.462	cg12143784	7	64541923	0.53417	11.8512	0.02518	7.07e-30	N
rs2241771	16	58021395	A	C	0.153	cg00491255	16	58019984	-0.68992	-11.8506	0.04542	7.11e-30	N
rs2241772	16	58021684	A	G	0.153	cg00491255	16	58019984	-0.68992	-11.8506	0.04542	7.11e-30	N
rs2405128	16	58020167	G	A	0.153	cg00491255	16	58019984	-0.68992	-11.8506	0.04542	7.11e-30	N
rs8055657	16	58020701	A	T	0.153	cg00491255	16	58019984	-0.68992	-11.8506	0.04542	7.11e-30	N
rs9663774	10	42517060	C	T	0.486	cg16633951	10	42971575	-0.50875	-11.8465	0.0491	7.42e-30	N
rs2900628	7	64721546	A	G	0.471	cg12143784	7	64541923	0.51677	11.8463	0.02324	7.43e-30	N
rs2303353	2	231944373	T	A	0.309	cg07929768	2	232055508	0.5354	11.8455	0.02938	7.49e-30	N
rs2505850	10	42800813	G	A	0.447	cg16633951	10	42971575	-0.519	-11.8372	0.05058	8.14e-30	N
rs7796960	7	64767457	C	T	0.459	cg12143784	7	64541923	0.52954	11.8369	0.02486	8.17e-30	N
rs8429	19	50410550	A	G	0.36	cg10751382	19	50391554	-0.5028	-11.835	0.0975	8.33e-30	N
rs9523	19	50411132	C	T	0.36	cg10751382	19	50391554	-0.5028	-11.835	0.0975	8.33e-30	N
rs1937991	10	42961292	A	G	0.367	cg04395798	10	42971732	0.51058	11.8348	0.03865	8.34e-30	N
rs143015660	10	42801627	G	C	0.448	cg16633951	10	42971575	-0.51789	-11.8309	0.05045	8.68e-30	N
rs145645249	10	42807910	G	A	0.448	cg16633951	10	42971575	-0.51789	-11.8309	0.05045	8.68e-30	N
rs28971522	10	42801633	C	A	0.448	cg16633951	10	42971575	-0.51789	-11.8309	0.05045	8.68e-30	N
rs4519048	10	42818429	G	A	0.448	cg16633951	10	42971575	-0.51789	-11.8309	0.05045	8.68e-30	N
rs60548508	10	42777789	G	A	0.448	cg16633951	10	42971575	-0.51789	-11.8309	0.05045	8.68e-30	N
rs7073618	10	42778964	C	A	0.448	cg16633951	10	42971575	-0.51789	-11.8309	0.05045	8.68e-30	N
rs77018243	10	42797521	I	R	0.448	cg16633951	10	42971575	-0.51789	-11.8309	0.05045	8.68e-30	N
rs28891083	16	58015335	T	A	0.153	cg00491255	16	58019984	-0.68819	-11.8293	0.0455	8.82e-30	N
rs200562218	7	64780388	D	R	0.462	cg12143784	7	64541923	0.52693	11.8269	0.02486	9.03e-30	N
rs4784874	16	58013332	A	G	0.153	cg00491255	16	58019984	-0.6879	-11.8234	0.0453	9.36e-30	N
rs12765826	10	42918251	T	G	0.369	cg04395798	10	42971732	0.50961	11.8193	0.03855	9.75e-30	N
rs1937996	10	42937056	G	A	0.369	cg04395798	10	42971732	0.50961	11.8193	0.03855	9.75e-30	N
rs2420004	10	42911413	A	G	0.369	cg04395798	10	42971732	0.50961	11.8193	0.03855	9.75e-30	N
rs2801014	10	42937495	T	C	0.369	cg04395798	10	42971732	0.50961	11.8193	0.03855	9.75e-30	N
rs2801022	10	42923364	A	G	0.369	cg04395798	10	42971732	0.50961	11.8193	0.03855	9.75e-30	N
rs2801945	10	42925057	A	T	0.369	cg04395798	10	42971732	0.50961	11.8193	0.03855	9.75e-30	N
rs2801946	10	42925108	C	A	0.369	cg04395798	10	42971732	0.50961	11.8193	0.03855	9.75e-30	N
rs2996690	10	42927730	T	C	0.369	cg04395798	10	42971732	0.50961	11.8193	0.03855	9.75e-30	N
rs3895215	10	42899080	A	G	0.369	cg04395798	10	42971732	0.50961	11.8193	0.03855	9.75e-30	N
rs3981436	10	42931011	A	G	0.369	cg04395798	10	42971732	0.50961	11.8193	0.03855	9.75e-30	N
rs66977053	10	42926170	D	R	0.369	cg04395798	10	42971732	0.50961	11.8193	0.03855	9.75e-30	N
rs10273075	7	64768178	A	G	0.461	cg12143784	7	64541923	0.52824	11.8157	0.02486	1.01e-29	N
rs2505792	10	42812549	A	G	0.446	cg16633951	10	42971575	-0.51845	-11.8141	0.05063	1.03e-29	N
rs10425303	19	50287644	G	A	0.428	cg10751382	19	50391554	0.48754	11.813	0.12509	1.04e-29	N
rs11266164	10	42430265	C	A	0.411	cg16633951	10	42971575	0.50786	11.8132	0.05588	1.04e-29	N
rs11238831	10	42794377	A	G	0.445	cg16633951	10	42971575	-0.5178	-11.8119	0.05072	1.05e-29	N
rs11238883	10	42802585	T	C	0.445	cg16633951	10	42971575	-0.5178	-11.8119	0.05072	1.05e-29	N
rs2505815	10	42848748	T	C	0.445	cg16633951	10	42971575	-0.5178	-11.8119	0.05072	1.05e-29	N
rs3004226	10	42825913	C	T	0.445	cg16633951	10	42971575	-0.5178	-11.8119	0.05072	1.05e-29	N
rs58396160	10	42833132	D	R	0.445	cg16633951	10	42971575	-0.5178	-11.8119	0.05072	1.05e-29	N
rs2241040	19	50308134	C	G	0.462	cg14071503	19	50391752	0.48653	11.8073	0.04967	1.1e-29	N
rs4316462	10	42611505	T	C	0.418	cg16633951	10	42971575	0.50427	11.8055	0.05342	1.12e-29	N
rs9326516	10	42620736	A	T	0.418	cg16633951	10	42971575	0.50427	11.8055	0.05342	1.12e-29	N
rs10908971	10	42481153	A	T	0.417	cg16633951	10	42971575	0.50513	11.8045	0.05396	1.13e-29	N
rs11511705	10	42440853	A	G	0.417	cg16633951	10	42971575	0.50513	11.8045	0.05396	1.13e-29	N
rs141656969	10	42489822	G	T	0.417	cg16633951	10	42971575	0.50513	11.8045	0.05396	1.13e-29	N
rs150669823	10	42490039	C	T	0.417	cg16633951	10	42971575	0.50513	11.8045	0.05396	1.13e-29	N
rs1827082	10	42496913	C	G	0.417	cg16633951	10	42971575	0.50513	11.8045	0.05396	1.13e-29	N
rs9794164	10	42478914	C	T	0.417	cg16633951	10	42971575	0.50513	11.8045	0.05396	1.13e-29	N
rs10797137	10	42498727	C	A	0.47	cg04395798	10	42971732	-0.5062	-11.8041	0.03502	1.14e-29	N
rs10908980	10	42508295	T	C	0.47	cg04395798	10	42971732	-0.5062	-11.8041	0.03502	1.14e-29	N
rs10908982	10	42515428	T	G	0.47	cg04395798	10	42971732	-0.5062	-11.8041	0.03502	1.14e-29	N
rs1589588	10	42467985	T	C	0.47	cg04395798	10	42971732	-0.5062	-11.8041	0.03502	1.14e-29	N
rs1818808	10	42509918	T	C	0.47	cg04395798	10	42971732	-0.5062	-11.8041	0.03502	1.14e-29	N
rs9665548	10	42447593	C	G	0.47	cg04395798	10	42971732	-0.5062	-11.8041	0.03502	1.14e-29	N
rs9794047	10	42506274	A	C	0.47	cg04395798	10	42971732	-0.5062	-11.8041	0.03502	1.14e-29	N
rs9794761	10	42497889	T	C	0.47	cg04395798	10	42971732	-0.5062	-11.8041	0.03502	1.14e-29	N
rs190382447	7	64718484	G	A	0.461	cg12143784	7	64541923	0.50983	11.8037	0.02353	1.14e-29	N
rs11522553	10	42511466	A	G	0.408	cg04395798	10	42971732	0.50362	11.8021	0.03559	1.16e-29	N
rs11523417	10	42511467	T	G	0.408	cg04395798	10	42971732	0.50362	11.8021	0.03559	1.16e-29	N
rs11524383	10	42511329	C	A	0.408	cg04395798	10	42971732	0.50362	11.8021	0.03559	1.16e-29	N
rs9702080	10	42507160	G	C	0.408	cg04395798	10	42971732	0.50362	11.8021	0.03559	1.16e-29	N
rs6950484	7	64953463	A	C	0.465	cg12143784	7	64541923	0.5339	11.7991	0.02537	1.2e-29	N
rs11239560	10	42943101	C	T	0.363	cg04395798	10	42971732	0.50863	11.7959	0.03759	1.23e-29	N
rs2801947	10	42951740	A	G	0.363	cg04395798	10	42971732	0.50863	11.7959	0.03759	1.23e-29	N
rs13023016	2	113378875	T	C	0.482	cg09133511	2	113384907	-0.36387	-11.7959	0.01084	1.23e-29	N
rs12219843	10	42431115	C	T	0.416	cg16633951	10	42971575	0.5043	11.7937	0.05445	1.26e-29	N
rs12772031	10	42434408	C	T	0.416	cg16633951	10	42971575	0.5043	11.7937	0.05445	1.26e-29	N
rs4239488	19	50405218	T	C	0.358	cg10751382	19	50391554	-0.50415	-11.7798	0.09874	1.45e-29	N
rs139494549	16	58015299	A	T	0.267	cg00491255	16	58019984	0.56686	11.7758	0.05022	1.51e-29	N
rs9934227	16	58019396	G	A	0.154	cg00491255	16	58019984	-0.68809	-11.7685	0.0455	1.63e-29	N
rs10900152	10	42886482	A	G	0.364	cg04395798	10	42971732	0.50823	11.7678	0.03759	1.64e-29	N
rs11524812	10	42886871	A	G	0.364	cg04395798	10	42971732	0.50823	11.7678	0.03759	1.64e-29	N
rs11528527	10	42882883	T	G	0.364	cg04395798	10	42971732	0.50823	11.7678	0.03759	1.64e-29	N
rs11528528	10	42882999	A	G	0.364	cg04395798	10	42971732	0.50823	11.7678	0.03759	1.64e-29	N
rs11528529	10	42883003	T	C	0.364	cg04395798	10	42971732	0.50823	11.7678	0.03759	1.64e-29	N
rs12414860	10	42882544	G	A	0.364	cg04395798	10	42971732	0.50823	11.7678	0.03759	1.64e-29	N
rs12414862	10	42882572	T	A	0.364	cg04395798	10	42971732	0.50823	11.7678	0.03759	1.64e-29	N
rs36052545	10	42883337	T	C	0.364	cg04395798	10	42971732	0.50823	11.7678	0.03759	1.64e-29	N
rs4245618	10	42890803	A	C	0.364	cg04395798	10	42971732	0.50823	11.7678	0.03759	1.64e-29	N
rs4949008	10	42884169	G	A	0.364	cg04395798	10	42971732	0.50823	11.7678	0.03759	1.64e-29	N
rs4949009	10	42885157	A	C	0.364	cg04395798	10	42971732	0.50823	11.7678	0.03759	1.64e-29	N
rs4949012	10	42889087	A	T	0.364	cg04395798	10	42971732	0.50823	11.7678	0.03759	1.64e-29	N
rs4949015	10	42894698	T	G	0.364	cg04395798	10	42971732	0.50823	11.7678	0.03759	1.64e-29	N
rs8101959	19	50308893	C	T	0.462	cg14071503	19	50391752	0.48561	11.7663	0.04918	1.66e-29	N
rs35750632	2	232022300	I	R	0.184	cg27665808	2	232055229	0.64126	11.7622	0.07713	1.73e-29	N
rs62193692	2	231906485	T	G	0.165	cg07929768	2	232055508	0.66826	11.7564	0.0555	1.84e-29	N
rs9702537	10	42460912	G	T	0.479	cg04395798	10	42971732	-0.50063	-11.7505	0.03475	1.95e-29	N
rs11678996	2	113387133	G	T	0.483	cg09133511	2	113384907	-0.36221	-11.7502	0.01081	1.95e-29	N
rs79747934	19	50412217	G	C	0.359	cg10751382	19	50391554	-0.50082	-11.7493	0.09721	1.97e-29	N
rs10793533	10	42810219	T	C	0.449	cg16633951	10	42971575	-0.51511	-11.7488	0.05039	1.98e-29	N
rs6724434	2	113375893	C	T	0.482	cg09133511	2	113384907	-0.36295	-11.7426	0.01081	2.11e-29	N
rs78620167	19	50304336	G	A	0.466	cg14071503	19	50391752	0.48523	11.7364	0.04875	2.24e-29	N
rs62193693	2	231906993	A	C	0.165	cg07929768	2	232055508	0.66652	11.7321	0.05544	2.34e-29	N
rs9794161	10	42508830	G	T	0.359	cg04395798	10	42971732	0.51186	11.7311	0.03575	2.37e-29	N
rs12218607	10	42485821	G	A	0.412	cg16633951	10	42971575	0.50548	11.7243	0.05532	2.53e-29	N
rs10900177	10	42905057	T	C	0.363	cg04395798	10	42971732	0.50631	11.7239	0.03741	2.54e-29	N
rs11239378	10	42905005	G	A	0.363	cg04395798	10	42971732	0.50631	11.7239	0.03741	2.54e-29	N
rs12268443	10	42895778	A	G	0.363	cg04395798	10	42971732	0.50631	11.7239	0.03741	2.54e-29	N
rs12768694	10	42887236	T	G	0.363	cg04395798	10	42971732	0.50631	11.7239	0.03741	2.54e-29	N
rs1892416	10	42929705	C	T	0.363	cg04395798	10	42971732	0.50631	11.7239	0.03741	2.54e-29	N
rs2154316	10	42939466	A	G	0.363	cg04395798	10	42971732	0.50631	11.7239	0.03741	2.54e-29	N
rs2419683	10	42902280	T	C	0.363	cg04395798	10	42971732	0.50631	11.7239	0.03741	2.54e-29	N
rs2420005	10	42911448	G	A	0.363	cg04395798	10	42971732	0.50631	11.7239	0.03741	2.54e-29	N
rs34188768	10	42922855	D	R	0.363	cg04395798	10	42971732	0.50631	11.7239	0.03741	2.54e-29	N
rs4408261	10	42903447	G	A	0.363	cg04395798	10	42971732	0.50631	11.7239	0.03741	2.54e-29	N
rs4409777	10	42897610	C	T	0.363	cg04395798	10	42971732	0.50631	11.7239	0.03741	2.54e-29	N
rs4514361	10	42890897	A	G	0.363	cg04395798	10	42971732	0.50631	11.7239	0.03741	2.54e-29	N
rs4948681	10	42895040	G	A	0.363	cg04395798	10	42971732	0.50631	11.7239	0.03741	2.54e-29	N
rs4949021	10	42919931	A	G	0.363	cg04395798	10	42971732	0.50631	11.7239	0.03741	2.54e-29	N
rs1255395	10	43035925	C	T	0.363	cg16633951	10	42971575	0.50291	11.7239	0.05369	2.54e-29	N
rs11771033	7	64900821	T	C	0.44	cg12143784	7	64541923	0.52428	11.7167	0.02446	2.73e-29	N
rs7598662	2	232106919	C	T	0.4	cg07929768	2	232055508	0.49702	11.7102	0.02515	2.92e-29	N
rs6422892	10	42613451	C	A	0.424	cg16633951	10	42971575	-0.52022	-11.71	0.05052	2.92e-29	N
rs28413128	19	50300026	G	A	0.463	cg14071503	19	50391752	0.48292	11.7096	0.04867	2.94e-29	N
rs67090148	10	42928668	D	R	0.362	cg04395798	10	42971732	0.50676	11.7071	0.03773	3.01e-29	N
rs200742460	2	231986695	D	R	0.153	cg27665808	2	232055229	0.68317	11.7066	0.07629	3.02e-29	N
rs28404483	10	42606751	A	G	0.42	cg16633951	10	42971575	0.49924	11.7034	0.0531	3.12e-29	N
rs6606608	10	42782853	A	G	0.442	cg16633951	10	42971575	-0.51293	-11.702	0.05021	3.17e-29	N
rs7086623	10	42786973	G	A	0.442	cg16633951	10	42971575	-0.51293	-11.702	0.05021	3.17e-29	N
rs4514357	10	42682512	G	C	0.446	cg16633951	10	42971575	-0.51135	-11.7002	0.05036	3.22e-29	N
rs6728639	2	232150766	T	C	0.274	cg07929768	2	232055508	0.55356	11.6974	0.03251	3.31e-29	N
rs7587953	2	232148407	T	C	0.274	cg07929768	2	232055508	0.55356	11.6974	0.03251	3.31e-29	N
rs2505831	10	42820002	A	G	0.447	cg16633951	10	42971575	-0.51223	-11.6937	0.05036	3.44e-29	N
rs10169399	2	232173111	A	C	0.275	cg07929768	2	232055508	0.55319	11.6864	0.03251	3.7e-29	N
rs7090779	10	42783790	A	C	0.44	cg16633951	10	42971575	-0.51296	-11.6845	0.0509	3.77e-29	N
rs13235214	7	64516150	T	C	0.493	cg12143784	7	64541923	0.51976	11.6842	0.02353	3.78e-29	N
rs1608190	10	42518437	A	C	0.473	cg04395798	10	42971732	-0.49882	-11.683	0.03468	3.83e-29	N
rs2954833	10	42778097	A	G	0.449	cg16633951	10	42971575	-0.51408	-11.6823	0.05036	3.85e-29	N
rs10900088	10	42849739	G	A	0.45	cg16633951	10	42971575	-0.50848	-11.6694	0.04998	4.39e-29	N
rs2505818	10	42846370	C	A	0.45	cg16633951	10	42971575	-0.50848	-11.6694	0.04998	4.39e-29	N
rs2505822	10	42841691	T	C	0.45	cg16633951	10	42971575	-0.50848	-11.6694	0.04998	4.39e-29	N
rs12622630	2	232152297	G	A	0.276	cg07929768	2	232055508	0.55066	11.668	0.02956	4.45e-29	N
rs11239843	10	42682133	C	A	0.446	cg16633951	10	42971575	-0.51071	-11.668	0.05045	4.45e-29	N
rs2159984	19	50305688	C	G	0.454	cg14071503	19	50391752	0.48106	11.6623	0.04879	4.71e-29	N
rs13418542	2	232156837	T	C	0.276	cg07929768	2	232055508	0.55228	11.662	0.03251	4.72e-29	N
rs13428268	2	232155641	G	T	0.276	cg07929768	2	232055508	0.55228	11.662	0.03251	4.72e-29	N
rs3731781	2	232159243	G	A	0.276	cg07929768	2	232055508	0.55228	11.662	0.03251	4.72e-29	N
rs62197352	2	232165233	G	C	0.276	cg07929768	2	232055508	0.55228	11.662	0.03251	4.72e-29	N
rs76972515	10	42486831	A	G	0.477	cg16633951	10	42971575	-0.50339	-11.659	0.04968	4.87e-29	N
rs28575392	10	42606543	A	G	0.416	cg16633951	10	42971575	0.49934	11.657	0.05164	4.96e-29	N
rs7075100	10	42606518	A	G	0.416	cg16633951	10	42971575	0.49934	11.657	0.05164	4.96e-29	N
rs10160100	10	42521592	T	A	0.474	cg16633951	10	42971575	-0.50825	-11.6539	0.04879	5.12e-29	N
rs7257463	19	50362201	A	T	0.353	cg10751382	19	50391554	0.49438	11.6466	0.12575	5.51e-29	N
rs2466456	10	42821332	C	T	0.441	cg16633951	10	42971575	-0.51262	-11.6464	0.05102	5.52e-29	N
rs1255401	10	42975170	T	C	0.328	cg04395798	10	42971732	0.51377	11.6417	0.03974	5.78e-29	N
rs1589587	10	42512897	C	G	0.474	cg04395798	10	42971732	-0.49785	-11.6401	0.03471	5.87e-29	N
rs2334905	10	42512030	G	A	0.474	cg04395798	10	42971732	-0.49785	-11.6401	0.03471	5.87e-29	N
rs9665583	10	42610826	G	C	0.459	cg04395798	10	42971732	-0.5046	-11.6377	0.03471	6.02e-29	N
rs143862812	10	42486481	T	G	0.409	cg04395798	10	42971732	0.50017	11.6359	0.03444	6.13e-29	N
rs1255380	10	43003014	C	T	0.362	cg16633951	10	42971575	0.49918	11.6299	0.05357	6.5e-29	N
rs1255385	10	43024411	T	C	0.362	cg16633951	10	42971575	0.49918	11.6299	0.05357	6.5e-29	N
rs1255386	10	43024991	C	T	0.362	cg16633951	10	42971575	0.49918	11.6299	0.05357	6.5e-29	N
rs1255387	10	43025535	T	G	0.362	cg16633951	10	42971575	0.49918	11.6299	0.05357	6.5e-29	N
rs1255396	10	43039187	T	C	0.362	cg16633951	10	42971575	0.49918	11.6299	0.05357	6.5e-29	N
rs11266164	10	42430265	C	A	0.411	cg04395798	10	42971732	0.50015	11.6121	0.03557	7.76e-29	N
rs62637067	10	42809526	C	T	0.455	cg16633951	10	42971575	-0.50605	-11.6101	0.04907	7.92e-29	N
rs4849083	2	113383985	G	A	0.437	cg09133511	2	113384907	-0.36476	-11.607	0.00974	8.17e-29	N
rs6758898	2	113382684	G	A	0.437	cg09133511	2	113384907	-0.36476	-11.607	0.00974	8.17e-29	N
rs4802623	19	50289859	A	G	0.417	cg10751382	19	50391554	0.47963	11.6053	0.12359	8.3e-29	N
rs4848284	2	113383010	T	A	0.436	cg09133511	2	113384907	-0.36473	-11.5979	0.00972	8.94e-29	N
rs11238831	10	42794377	A	G	0.445	cg04395798	10	42971732	-0.50936	-11.5952	0.03493	9.19e-29	N
rs11238883	10	42802585	T	C	0.445	cg04395798	10	42971732	-0.50936	-11.5952	0.03493	9.19e-29	N
rs2505815	10	42848748	T	C	0.445	cg04395798	10	42971732	-0.50936	-11.5952	0.03493	9.19e-29	N
rs3004226	10	42825913	C	T	0.445	cg04395798	10	42971732	-0.50936	-11.5952	0.03493	9.19e-29	N
rs58396160	10	42833132	D	R	0.445	cg04395798	10	42971732	-0.50936	-11.5952	0.03493	9.19e-29	N
rs1255413	10	43066414	T	C	0.366	cg16633951	10	42971575	0.49709	11.5948	0.04901	9.22e-29	N
rs7260222	19	50354211	T	C	0.349	cg10751382	19	50391554	0.49469	11.5839	0.12593	1.03e-28	N
rs147245510	2	232117819	I	R	0.339	cg27665808	2	232055229	0.53116	11.5751	0.06233	1.12e-28	N
rs9973970	2	232097383	C	T	0.338	cg27665808	2	232055229	0.53054	11.5733	0.06163	1.14e-28	N
rs12612801	2	232120479	G	A	0.34	cg27665808	2	232055229	0.53132	11.572	0.06295	1.16e-28	N
rs9679430	2	232122482	G	A	0.34	cg27665808	2	232055229	0.53132	11.572	0.06295	1.16e-28	N
rs10198572	2	232096723	A	G	0.338	cg27665808	2	232055229	0.53069	11.5701	0.06171	1.18e-28	N
rs12609897	19	50345328	C	T	0.353	cg10751382	19	50391554	0.49128	11.5606	0.12492	1.3e-28	N
rs10423897	19	50357189	C	T	0.352	cg10751382	19	50391554	0.49232	11.5586	0.12573	1.32e-28	N
rs11770224	7	64900721	A	G	0.442	cg12143784	7	64541923	0.51939	11.5589	0.02437	1.32e-28	N
rs1808615	7	64900065	A	G	0.442	cg12143784	7	64541923	0.51939	11.5589	0.02437	1.32e-28	N
rs34628100	10	42450841	C	A	0.488	cg16633951	10	42971575	-0.50282	-11.559	0.04838	1.32e-28	N
rs28541349	2	232153823	A	G	0.274	cg07929768	2	232055508	0.54975	11.5583	0.03238	1.33e-28	N
rs10424397	19	50344969	G	A	0.353	cg10751382	19	50391554	0.49136	11.5556	0.12472	1.36e-28	N
rs11266028	10	42512008	G	A	0.466	cg16633951	10	42971575	0.48832	11.5547	0.05216	1.37e-28	N
rs11493021	10	42514611	T	C	0.466	cg16633951	10	42971575	0.48832	11.5547	0.05216	1.37e-28	N
rs11522555	10	42504697	C	G	0.466	cg16633951	10	42971575	0.48832	11.5547	0.05216	1.37e-28	N
rs9663319	10	42511839	A	G	0.466	cg16633951	10	42971575	0.48832	11.5547	0.05216	1.37e-28	N
rs149667515	16	58015302	A	T	0.202	cg00491255	16	58019984	0.59482	11.5544	0.04898	1.38e-28	N
rs200430166	16	58015300	D	R	0.202	cg00491255	16	58019984	0.59482	11.5544	0.04898	1.38e-28	N
rs2505792	10	42812549	A	G	0.446	cg04395798	10	42971732	-0.50825	-11.5508	0.03478	1.43e-28	N
rs4609560	10	42698670	A	G	0.453	cg04395798	10	42971732	-0.50817	-11.5495	0.03475	1.45e-28	N
rs7918770	10	42608212	T	C	0.425	cg16633951	10	42971575	0.49317	11.5465	0.05293	1.49e-28	N
rs13418346	2	232132374	A	G	0.339	cg27665808	2	232055229	0.52998	11.5448	0.06233	1.51e-28	N
rs1255389	10	43026647	C	T	0.362	cg16633951	10	42971575	0.49554	11.5385	0.05327	1.61e-28	N
rs1255392	10	43021089	A	T	0.325	cg16633951	10	42971575	0.51043	11.5341	0.04947	1.68e-28	N
rs4398787	7	64955342	C	T	0.474	cg12143784	7	64541923	0.51552	11.5334	0.02493	1.7e-28	N
rs1255414	10	43057681	C	T	0.355	cg16633951	10	42971575	0.49771	11.5324	0.0486	1.71e-28	N
rs4293079	10	42782446	A	G	0.443	cg16633951	10	42971575	-0.50689	-11.5256	0.0503	1.83e-28	N
rs10899776	10	42607692	T	C	0.42	cg16633951	10	42971575	0.49274	11.5245	0.05018	1.85e-28	N
rs10899777	10	42607697	A	G	0.42	cg16633951	10	42971575	0.49274	11.5245	0.05018	1.85e-28	N
rs11669608	19	50290849	G	A	0.415	cg10751382	19	50391554	0.47676	11.5236	0.12413	1.87e-28	N
rs2466490	10	42872956	A	T	0.429	cg04395798	10	42971732	0.4951	11.5215	0.036	1.91e-28	N
rs9664345	10	42465390	C	G	0.476	cg04395798	10	42971732	-0.49398	-11.5215	0.03471	1.91e-28	N
rs2419495	7	64547710	A	G	0.494	cg12143784	7	64541923	0.51328	11.5144	0.02344	2.05e-28	N
rs9665333	10	42605591	T	A	0.46	cg04395798	10	42971732	-0.49923	-11.5138	0.03467	2.06e-28	N
rs2505850	10	42800813	G	A	0.447	cg04395798	10	42971732	-0.50638	-11.5089	0.0348	2.16e-28	N
rs12242679	10	42635791	A	T	0.429	cg16633951	10	42971575	-0.51316	-11.5072	0.05093	2.2e-28	N
rs7090779	10	42783790	A	C	0.44	cg04395798	10	42971732	-0.50554	-11.496	0.03492	2.46e-28	N
rs55821134	10	42463305	T	A	0.476	cg16633951	10	42971575	0.48442	11.4943	0.05101	2.5e-28	N
rs9422470	10	42931825	T	C	0.36	cg04395798	10	42971732	0.4978	11.489	0.03765	2.63e-28	N
rs1255370	10	42985615	C	T	0.364	cg16633951	10	42971575	0.49079	11.483	0.05298	2.79e-28	N
rs11897387	2	232122576	C	T	0.341	cg27665808	2	232055229	0.52861	11.4809	0.06163	2.85e-28	N
rs908545	2	113389232	G	A	0.469	cg09133511	2	113384907	-0.35415	-11.4774	0.01029	2.95e-28	N
rs2473112	10	43094357	C	T	0.365	cg16633951	10	42971575	0.49218	11.4773	0.04832	2.95e-28	N
rs2473115	10	43122649	G	A	0.365	cg16633951	10	42971575	0.49184	11.4764	0.04821	2.98e-28	N
rs143015660	10	42801627	G	C	0.448	cg04395798	10	42971732	-0.50428	-11.4757	0.03467	3e-28	N
rs145645249	10	42807910	G	A	0.448	cg04395798	10	42971732	-0.50428	-11.4757	0.03467	3e-28	N
rs28971522	10	42801633	C	A	0.448	cg04395798	10	42971732	-0.50428	-11.4757	0.03467	3e-28	N
rs4519048	10	42818429	G	A	0.448	cg04395798	10	42971732	-0.50428	-11.4757	0.03467	3e-28	N
rs60548508	10	42777789	G	A	0.448	cg04395798	10	42971732	-0.50428	-11.4757	0.03467	3e-28	N
rs7073618	10	42778964	C	A	0.448	cg04395798	10	42971732	-0.50428	-11.4757	0.03467	3e-28	N
rs77018243	10	42797521	I	R	0.448	cg04395798	10	42971732	-0.50428	-11.4757	0.03467	3e-28	N
rs56295567	2	232048612	G	A	0.314	cg27665808	2	232055229	0.53209	11.474	0.06216	3.05e-28	N
rs2305916	19	50391301	G	T	0.439	cg11625877	19	50391885	0.50548	11.4734	0.11767	3.07e-28	N
rs2504025	10	43118592	A	G	0.357	cg16633951	10	42971575	0.49267	11.4722	0.04859	3.11e-28	N
rs34366908	10	43099244	D	R	0.357	cg16633951	10	42971575	0.49267	11.4722	0.04859	3.11e-28	N
rs34604661	10	43096373	D	R	0.357	cg16633951	10	42971575	0.49267	11.4722	0.04859	3.11e-28	N
rs10908979	10	42503038	G	C	0.493	cg16633951	10	42971575	-0.49663	-11.4706	0.04787	3.16e-28	N
rs11265993	10	42476722	C	A	0.493	cg16633951	10	42971575	-0.49663	-11.4706	0.04787	3.16e-28	N
rs9665296	10	42501032	G	A	0.493	cg16633951	10	42971575	-0.49663	-11.4706	0.04787	3.16e-28	N
rs2954825	10	42836158	C	G	0.408	cg16633951	10	42971575	-0.49786	-11.4689	0.04669	3.21e-28	N
rs1147918	10	43090783	C	T	0.366	cg16633951	10	42971575	0.49209	11.4665	0.04843	3.29e-28	N
rs1147919	10	43091958	C	T	0.366	cg16633951	10	42971575	0.49209	11.4665	0.04843	3.29e-28	N
rs10908953	10	42458955	T	C	0.476	cg04395798	10	42971732	-0.49119	-11.4648	0.03467	3.34e-28	N
rs1119185	10	42459430	T	C	0.476	cg04395798	10	42971732	-0.49119	-11.4648	0.03467	3.34e-28	N
rs1119186	10	42459493	T	C	0.476	cg04395798	10	42971732	-0.49119	-11.4648	0.03467	3.34e-28	N
rs11265983	10	42467165	T	C	0.476	cg04395798	10	42971732	-0.49119	-11.4648	0.03467	3.34e-28	N
rs11499333	10	42463659	A	T	0.476	cg04395798	10	42971732	-0.49119	-11.4648	0.03467	3.34e-28	N
rs11499334	10	42463680	A	G	0.476	cg04395798	10	42971732	-0.49119	-11.4648	0.03467	3.34e-28	N
rs11528793	10	42461954	G	A	0.476	cg04395798	10	42971732	-0.49119	-11.4648	0.03467	3.34e-28	N
rs1603831	10	42462848	A	G	0.476	cg04395798	10	42971732	-0.49119	-11.4648	0.03467	3.34e-28	N
rs1846408	10	42463062	T	C	0.476	cg04395798	10	42971732	-0.49119	-11.4648	0.03467	3.34e-28	N
rs1851485	10	42468312	C	G	0.476	cg04395798	10	42971732	-0.49119	-11.4648	0.03467	3.34e-28	N
rs9663778	10	42504591	T	G	0.476	cg04395798	10	42971732	-0.49119	-11.4648	0.03467	3.34e-28	N
rs7248744	19	50385031	G	A	0.438	cg11625877	19	50391885	0.50378	11.4644	0.11538	3.36e-28	N
rs9794103	10	42421872	A	C	0.474	cg16633951	10	42971575	0.48898	11.4617	0.05356	3.45e-28	N
rs34562736	10	43111354	D	R	0.462	cg16633951	10	42971575	0.4823	11.4566	0.04445	3.62e-28	N
rs10908967	10	42476873	T	C	0.489	cg16633951	10	42971575	-0.49817	-11.4547	0.04829	3.69e-28	N
rs1255369	10	42984386	T	G	0.351	cg16633951	10	42971575	0.49469	11.4522	0.05268	3.79e-28	N
rs590937	10	43149991	C	T	0.454	cg16633951	10	42971575	0.47219	11.4518	0.04231	3.8e-28	N
rs9663438	10	42615144	T	C	0.417	cg16633951	10	42971575	-0.50707	-11.4438	0.04685	4.11e-28	N
rs10908981	10	42514721	A	T	0.42	cg16633951	10	42971575	-0.48297	-11.4412	0.04513	4.22e-28	N
rs36001476	10	42462912	I	R	0.42	cg16633951	10	42971575	-0.48297	-11.4412	0.04513	4.22e-28	N
rs9702482	10	42460509	G	T	0.421	cg16633951	10	42971575	-0.48209	-11.4396	0.04497	4.28e-28	N
rs9702870	10	42460511	C	A	0.421	cg16633951	10	42971575	-0.48209	-11.4396	0.04497	4.28e-28	N
rs2505831	10	42820002	A	G	0.447	cg04395798	10	42971732	-0.50236	-11.4393	0.03452	4.29e-28	N
rs6748332	2	231914845	T	C	0.214	cg07929768	2	232055508	0.59316	11.4389	0.0448	4.31e-28	N
rs9702520	10	42512697	T	C	0.482	cg04395798	10	42971732	0.49744	11.4351	0.03743	4.48e-28	N
rs1608189	10	42518987	T	A	0.423	cg16633951	10	42971575	-0.47992	-11.4345	0.04457	4.5e-28	N
rs1818809	10	42509794	C	T	0.423	cg16633951	10	42971575	-0.47992	-11.4345	0.04457	4.5e-28	N
rs7604042	2	232135541	T	A	0.336	cg27665808	2	232055229	0.52456	11.4342	0.06134	4.52e-28	N
rs4718243	7	64916217	A	G	0.442	cg12143784	7	64541923	0.51515	11.434	0.02441	4.53e-28	N
rs4718244	7	64916237	G	A	0.442	cg12143784	7	64541923	0.51515	11.434	0.02441	4.53e-28	N
rs6958699	7	64916372	G	A	0.442	cg12143784	7	64541923	0.51515	11.434	0.02441	4.53e-28	N
rs2489699	10	42843933	A	G	0.436	cg04395798	10	42971732	0.49522	11.4307	0.03641	4.67e-28	N
rs7904791	10	42774626	C	T	0.421	cg16633951	10	42971575	-0.5094	-11.429	0.04685	4.76e-28	N
rs2466456	10	42821332	C	T	0.441	cg04395798	10	42971732	-0.50406	-11.4281	0.03492	4.8e-28	N
rs11642939	16	58006470	T	C	0.156	cg00491255	16	58019984	-0.6622	-11.426	0.04244	4.9e-28	N
rs4514357	10	42682512	G	C	0.446	cg04395798	10	42971732	-0.50071	-11.4247	0.03452	4.96e-28	N
rs2489686	10	42869769	C	T	0.433	cg04395798	10	42971732	0.4939	11.4245	0.03481	4.97e-28	N
rs11239114	10	42839105	G	A	0.413	cg16633951	10	42971575	-0.49389	-11.4242	0.0463	4.99e-28	N
rs12411871	10	42839095	C	A	0.413	cg16633951	10	42971575	-0.49389	-11.4242	0.0463	4.99e-28	N
rs2466475	10	42856143	C	A	0.413	cg16633951	10	42971575	-0.49389	-11.4242	0.0463	4.99e-28	N
rs2466481	10	42859628	G	A	0.413	cg16633951	10	42971575	-0.49389	-11.4242	0.0463	4.99e-28	N
rs2489684	10	42862079	C	T	0.413	cg16633951	10	42971575	-0.49389	-11.4242	0.0463	4.99e-28	N
rs2505803	10	42864101	C	A	0.413	cg16633951	10	42971575	-0.49389	-11.4242	0.0463	4.99e-28	N
rs2505828	10	42836627	A	G	0.413	cg16633951	10	42971575	-0.49389	-11.4242	0.0463	4.99e-28	N
rs2505838	10	42827951	A	G	0.413	cg16633951	10	42971575	-0.49389	-11.4242	0.0463	4.99e-28	N
rs1937991	10	42961292	A	G	0.367	cg16633951	10	42971575	0.49571	11.4207	0.05352	5.16e-28	N
rs71299640	10	43098307	I	R	0.357	cg16633951	10	42971575	0.49042	11.4186	0.04839	5.27e-28	N
rs1147916	10	43071281	A	G	0.357	cg16633951	10	42971575	0.49302	11.4179	0.04839	5.3e-28	N
rs2466466	10	42832578	T	G	0.408	cg16633951	10	42971575	-0.49688	-11.4176	0.0462	5.32e-28	N
rs2419679	10	42892346	C	T	0.37	cg16633951	10	42971575	0.49575	11.4151	0.05335	5.45e-28	N
rs4448638	10	42931151	A	G	0.37	cg16633951	10	42971575	0.49575	11.4151	0.05335	5.45e-28	N
rs1818811	10	42509506	G	C	0.423	cg16633951	10	42971575	-0.48208	-11.4143	0.04516	5.49e-28	N
rs3745486	19	50383636	C	T	0.441	cg11625877	19	50391885	0.5018	11.4083	0.11701	5.83e-28	N
rs7248498	19	50384882	G	A	0.441	cg11625877	19	50391885	0.5018	11.4083	0.11701	5.83e-28	N
rs746738	19	50386340	C	T	0.441	cg11625877	19	50391885	0.5018	11.4083	0.11701	5.83e-28	N
rs10908971	10	42481153	A	T	0.417	cg04395798	10	42971732	0.49017	11.4043	0.03493	6.06e-28	N
rs11511705	10	42440853	A	G	0.417	cg04395798	10	42971732	0.49017	11.4043	0.03493	6.06e-28	N
rs141656969	10	42489822	G	T	0.417	cg04395798	10	42971732	0.49017	11.4043	0.03493	6.06e-28	N
rs150669823	10	42490039	C	T	0.417	cg04395798	10	42971732	0.49017	11.4043	0.03493	6.06e-28	N
rs1827082	10	42496913	C	G	0.417	cg04395798	10	42971732	0.49017	11.4043	0.03493	6.06e-28	N
rs9794164	10	42478914	C	T	0.417	cg04395798	10	42971732	0.49017	11.4043	0.03493	6.06e-28	N
rs10793533	10	42810219	T	C	0.449	cg04395798	10	42971732	-0.50181	-11.4031	0.03478	6.13e-28	N
rs11266024	10	42505608	T	A	0.465	cg16633951	10	42971575	0.48225	11.4015	0.05209	6.23e-28	N
rs11266025	10	42505681	G	A	0.465	cg16633951	10	42971575	0.48225	11.4015	0.05209	6.23e-28	N
rs11266180	10	42447243	G	T	0.465	cg16633951	10	42971575	0.48225	11.4015	0.05209	6.23e-28	N
rs11528759	10	42467126	G	A	0.465	cg16633951	10	42971575	0.48225	11.4015	0.05209	6.23e-28	N
rs11528890	10	42453729	A	G	0.465	cg16633951	10	42971575	0.48225	11.4015	0.05209	6.23e-28	N
rs1603832	10	42493965	T	A	0.465	cg16633951	10	42971575	0.48225	11.4015	0.05209	6.23e-28	N
rs2140208	10	42448304	T	G	0.465	cg16633951	10	42971575	0.48225	11.4015	0.05209	6.23e-28	N
rs61846586	10	42460091	A	T	0.465	cg16633951	10	42971575	0.48225	11.4015	0.05209	6.23e-28	N
rs9663147	10	42507421	T	C	0.465	cg16633951	10	42971575	0.48225	11.4015	0.05209	6.23e-28	N
rs9663326	10	42507485	T	A	0.465	cg16633951	10	42971575	0.48225	11.4015	0.05209	6.23e-28	N
rs9665555	10	42447673	A	C	0.465	cg16633951	10	42971575	0.48225	11.4015	0.05209	6.23e-28	N
rs9702505	10	42460710	A	G	0.465	cg16633951	10	42971575	0.48225	11.4015	0.05209	6.23e-28	N
rs4316462	10	42611505	T	C	0.418	cg04395798	10	42971732	0.48909	11.3988	0.03436	6.4e-28	N
rs9326516	10	42620736	A	T	0.418	cg04395798	10	42971732	0.48909	11.3988	0.03436	6.4e-28	N
rs4802635	19	50401320	A	G	0.446	cg14071503	19	50391752	-0.47688	-11.3988	0.04673	6.4e-28	N
rs10900088	10	42849739	G	A	0.45	cg04395798	10	42971732	-0.49766	-11.3884	0.03423	7.09e-28	N
rs2505818	10	42846370	C	A	0.45	cg04395798	10	42971732	-0.49766	-11.3884	0.03423	7.09e-28	N
rs2505822	10	42841691	T	C	0.45	cg04395798	10	42971732	-0.49766	-11.3884	0.03423	7.09e-28	N
rs1255408	10	42980138	T	C	0.437	cg16633951	10	42971575	0.47958	11.3882	0.04442	7.1e-28	N
rs1255409	10	42981189	C	T	0.437	cg16633951	10	42971575	0.47958	11.3882	0.04442	7.1e-28	N
rs1255410	10	42981321	G	A	0.437	cg16633951	10	42971575	0.47958	11.3882	0.04442	7.1e-28	N
rs12785114	10	42887696	C	T	0.365	cg16633951	10	42971575	0.49485	11.3867	0.04852	7.21e-28	N
rs12218607	10	42485821	G	A	0.412	cg04395798	10	42971732	0.49262	11.3847	0.03623	7.35e-28	N
rs4717262	7	64917804	A	G	0.447	cg12143784	7	64541923	0.51423	11.3834	0.02452	7.44e-28	N
rs6460249	7	64917126	T	C	0.447	cg12143784	7	64541923	0.51423	11.3834	0.02452	7.44e-28	N
rs6460250	7	64917141	T	C	0.447	cg12143784	7	64541923	0.51423	11.3834	0.02452	7.44e-28	N
rs7793665	7	64916923	C	T	0.447	cg12143784	7	64541923	0.51423	11.3834	0.02452	7.44e-28	N
rs1119187	10	42459709	G	A	0.495	cg16633951	10	42971575	-0.49396	-11.3816	0.04765	7.58e-28	N
rs10909011	10	42436301	G	A	0.462	cg04395798	10	42971732	-0.4952	-11.3803	0.03468	7.67e-28	N
rs11265994	10	42477634	T	C	0.462	cg04395798	10	42971732	-0.4952	-11.3803	0.03468	7.67e-28	N
rs1608197	10	42497519	A	G	0.462	cg04395798	10	42971732	-0.4952	-11.3803	0.03468	7.67e-28	N
rs9664628	10	42469340	G	C	0.462	cg04395798	10	42971732	-0.4952	-11.3803	0.03468	7.67e-28	N
rs11239843	10	42682133	C	A	0.446	cg04395798	10	42971732	-0.49955	-11.3793	0.03467	7.75e-28	N
rs2954833	10	42778097	A	G	0.449	cg04395798	10	42971732	-0.50231	-11.379	0.03418	7.77e-28	N
rs6606608	10	42782853	A	G	0.442	cg04395798	10	42971732	-0.50035	-11.3756	0.03465	8.03e-28	N
rs7086623	10	42786973	G	A	0.442	cg04395798	10	42971732	-0.50035	-11.3756	0.03465	8.03e-28	N
rs6422892	10	42613451	C	A	0.424	cg04395798	10	42971732	-0.50716	-11.3756	0.0327	8.04e-28	N
rs75428157	10	42822757	D	R	0.412	cg16633951	10	42971575	-0.49295	-11.3748	0.04583	8.1e-28	N
rs3810268	19	50379193	T	C	0.422	cg11625877	19	50391885	0.49679	11.374	0.11367	8.17e-28	N
rs8110265	19	50377835	A	G	0.422	cg11625877	19	50391885	0.49679	11.374	0.11367	8.17e-28	N
rs11266147	10	42412787	T	G	0.47	cg16633951	10	42971575	0.48618	11.3735	0.05268	8.2e-28	N
rs2334909	10	42431059	T	G	0.473	cg16633951	10	42971575	0.48509	11.3672	0.05229	8.73e-28	N
rs2335064	10	42427989	C	A	0.473	cg16633951	10	42971575	0.48509	11.3672	0.05229	8.73e-28	N
rs34461098	10	42430171	C	T	0.473	cg16633951	10	42971575	0.48509	11.3672	0.05229	8.73e-28	N
rs9794416	10	42421823	A	G	0.472	cg16633951	10	42971575	0.48509	11.3672	0.05229	8.73e-28	N
rs12219843	10	42431115	C	T	0.416	cg04395798	10	42971732	0.48836	11.3668	0.03493	8.76e-28	N
rs12772031	10	42434408	C	T	0.416	cg04395798	10	42971732	0.48836	11.3668	0.03493	8.76e-28	N
rs2201903	10	42427983	T	C	0.464	cg04395798	10	42971732	-0.49449	-11.3669	0.03475	8.76e-28	N
rs59233401	2	231908882	D	R	0.16	cg27665808	2	232055229	0.65768	11.3652	0.07498	8.9e-28	N
rs6436996	2	231907978	C	A	0.16	cg27665808	2	232055229	0.65768	11.3652	0.07498	8.9e-28	N
rs6854	2	231913395	T	G	0.16	cg27665808	2	232055229	0.65768	11.3652	0.07498	8.9e-28	N
rs2489685	10	42864138	A	G	0.434	cg04395798	10	42971732	0.48952	11.3647	0.0344	8.94e-28	N
rs2466490	10	42872956	A	T	0.429	cg16633951	10	42971575	0.48966	11.364	0.05147	9e-28	N
rs11265989	10	42472899	G	A	0.474	cg16633951	10	42971575	0.48477	11.3621	0.05171	9.17e-28	N
rs11528808	10	42496934	G	A	0.474	cg16633951	10	42971575	0.48477	11.3621	0.05171	9.17e-28	N
rs11598261	10	42526835	A	T	0.474	cg16633951	10	42971575	0.48477	11.3621	0.05171	9.17e-28	N
rs139784387	10	42440050	G	A	0.474	cg16633951	10	42971575	0.48477	11.3621	0.05171	9.17e-28	N
rs1846411	10	42481444	G	A	0.474	cg16633951	10	42971575	0.48477	11.3621	0.05171	9.17e-28	N
rs9664755	10	42524626	A	G	0.474	cg16633951	10	42971575	0.48477	11.3621	0.05171	9.17e-28	N
rs9702335	10	42472950	C	T	0.474	cg16633951	10	42971575	0.48477	11.3621	0.05171	9.17e-28	N
rs9731663	10	42434977	A	C	0.474	cg16633951	10	42971575	0.48477	11.3621	0.05171	9.17e-28	N
rs9732776	10	42862565	G	A	0.433	cg04395798	10	42971732	0.49068	11.3605	0.03414	9.32e-28	N
rs11528883	10	42442218	T	C	0.471	cg16633951	10	42971575	0.48437	11.3589	0.0516	9.47e-28	N
rs200616719	10	42843299	I	R	0.434	cg04395798	10	42971732	0.48969	11.3565	0.03444	9.69e-28	N
rs34195697	10	43136511	I	R	0.37	cg16633951	10	42971575	0.48251	11.3559	0.04546	9.75e-28	N
rs2505793	10	42812881	T	C	0.43	cg04395798	10	42971732	0.49073	11.3545	0.03433	9.89e-28	N
rs11083985	19	50378143	C	T	0.421	cg11625877	19	50391885	0.49734	11.3529	0.11308	1e-27	N
rs2290775	19	50375242	T	C	0.421	cg11625877	19	50391885	0.49734	11.3529	0.11308	1e-27	N
rs731826	19	50380858	G	T	0.421	cg11625877	19	50391885	0.49734	11.3529	0.11308	1e-27	N
rs9732776	10	42862565	G	A	0.433	cg16633951	10	42971575	0.49074	11.3524	0.05049	1.01e-27	N
rs1147917	10	43078973	A	G	0.356	cg16633951	10	42971575	0.48765	11.3509	0.0482	1.02e-27	N
rs2473116	10	43136889	A	G	0.363	cg16633951	10	42971575	0.48267	11.3465	0.04528	1.07e-27	N
rs2484296	10	43135220	T	C	0.363	cg16633951	10	42971575	0.48267	11.3465	0.04528	1.07e-27	N
rs57449421	7	64415262	G	T	0.486	cg12143784	7	64541923	-0.48802	-11.3406	0.0221	1.13e-27	N
rs202092097	10	42774684	D	R	0.436	cg16633951	10	42971575	-0.50292	-11.3376	0.04797	1.17e-27	N
rs10169827	2	232049722	G	A	0.316	cg27665808	2	232055229	0.52375	11.3374	0.05934	1.17e-27	N
rs10179264	2	232050603	C	G	0.316	cg27665808	2	232055229	0.52375	11.3374	0.05934	1.17e-27	N
rs10202608	2	232050653	G	A	0.316	cg27665808	2	232055229	0.52375	11.3374	0.05934	1.17e-27	N
rs10202782	2	232050796	G	A	0.316	cg27665808	2	232055229	0.52375	11.3374	0.05934	1.17e-27	N
rs10202806	2	232050852	G	A	0.316	cg27665808	2	232055229	0.52375	11.3374	0.05934	1.17e-27	N
rs10206322	2	232050072	C	T	0.316	cg27665808	2	232055229	0.52375	11.3374	0.05934	1.17e-27	N
rs6727962	2	232045268	A	G	0.316	cg27665808	2	232055229	0.52375	11.3374	0.05934	1.17e-27	N
rs6755467	2	232044684	C	A	0.316	cg27665808	2	232055229	0.52375	11.3374	0.05934	1.17e-27	N
rs35135890	10	42435625	I	R	0.472	cg16633951	10	42971575	0.48588	11.3344	0.05219	1.2e-27	N
rs1608193	10	42513049	T	C	0.425	cg16633951	10	42971575	-0.47636	-11.3337	0.04436	1.21e-27	N
rs1255376	10	42995069	T	G	0.35	cg16633951	10	42971575	0.49098	11.3309	0.05262	1.25e-27	N
rs1255375	10	42993900	T	C	0.415	cg04395798	10	42971732	0.48308	11.328	0.0358	1.28e-27	N
rs2335065	10	42427405	T	G	0.413	cg16633951	10	42971575	-0.48252	-11.3253	0.04485	1.32e-27	N
rs11284178	10	42861255	D	R	0.436	cg04395798	10	42971732	0.48835	11.3169	0.03486	1.43e-27	N
rs146188103	10	42870620	I	R	0.418	cg16633951	10	42971575	-0.4864	-11.3159	0.04473	1.44e-27	N
rs7074992	10	42619450	A	G	0.438	cg04395798	10	42971732	-0.50046	-11.315	0.03366	1.45e-27	N
rs9663850	10	42435262	C	A	0.464	cg04395798	10	42971732	-0.49256	-11.315	0.03467	1.46e-27	N
rs12355221	10	42443348	T	C	0.47	cg04395798	10	42971732	-0.49019	-11.3114	0.03445	1.51e-27	N
rs1937986	10	42951476	G	A	0.368	cg16633951	10	42971575	0.49093	11.3113	0.05323	1.51e-27	N
rs2022855	10	42946535	A	G	0.368	cg16633951	10	42971575	0.49093	11.3113	0.05323	1.51e-27	N
rs2801017	10	42952657	C	G	0.368	cg16633951	10	42971575	0.49093	11.3113	0.05323	1.51e-27	N
rs10262381	7	64946076	A	G	0.489	cg12143784	7	64541923	-0.50345	-11.309	0.02378	1.54e-27	N
rs2505807	10	42868071	C	T	0.418	cg16633951	10	42971575	-0.48659	-11.3092	0.04497	1.54e-27	N
rs62193694	2	231907054	T	C	0.163	cg27665808	2	232055229	0.65516	11.3091	0.07565	1.54e-27	N
rs2505832	10	42820806	T	C	0.415	cg16633951	10	42971575	-0.48815	-11.3049	0.04513	1.61e-27	N
rs2489688	10	42873734	T	A	0.428	cg04395798	10	42971732	0.48617	11.3037	0.03536	1.62e-27	N
rs3028799	10	42461271	I	R	0.472	cg04395798	10	42971732	-0.48631	-11.3013	0.03433	1.66e-27	N
rs11266169	10	42436765	G	T	0.472	cg16633951	10	42971575	0.48209	11.3004	0.05199	1.68e-27	N
rs147475896	10	42838391	I	R	0.431	cg04395798	10	42971732	0.48918	11.3	0.03414	1.69e-27	N
rs200567413	10	42838398	D	R	0.431	cg04395798	10	42971732	0.48918	11.3	0.03414	1.69e-27	N
rs2466469	10	42838219	C	T	0.431	cg04395798	10	42971732	0.48918	11.3	0.03414	1.69e-27	N
rs2466470	10	42838914	C	T	0.431	cg04395798	10	42971732	0.48918	11.3	0.03414	1.69e-27	N
rs2466471	10	42842610	T	C	0.431	cg04395798	10	42971732	0.48918	11.3	0.03414	1.69e-27	N
rs2466472	10	42853424	G	A	0.431	cg04395798	10	42971732	0.48918	11.3	0.03414	1.69e-27	N
rs2466473	10	42854816	A	C	0.431	cg04395798	10	42971732	0.48918	11.3	0.03414	1.69e-27	N
rs2466476	10	42856384	C	T	0.431	cg04395798	10	42971732	0.48918	11.3	0.03414	1.69e-27	N
rs2466477	10	42857883	T	C	0.431	cg04395798	10	42971732	0.48918	11.3	0.03414	1.69e-27	N
rs2466478	10	42858154	A	G	0.431	cg04395798	10	42971732	0.48918	11.3	0.03414	1.69e-27	N
rs2466480	10	42859060	C	T	0.431	cg04395798	10	42971732	0.48918	11.3	0.03414	1.69e-27	N
rs2466488	10	42868177	A	G	0.431	cg04395798	10	42971732	0.48918	11.3	0.03414	1.69e-27	N
rs2489680	10	42844542	C	T	0.431	cg04395798	10	42971732	0.48918	11.3	0.03414	1.69e-27	N
rs2489683	10	42857854	T	G	0.431	cg04395798	10	42971732	0.48918	11.3	0.03414	1.69e-27	N
rs2489716	10	42844126	A	G	0.431	cg04395798	10	42971732	0.48918	11.3	0.03414	1.69e-27	N
rs2505798	10	42813846	T	C	0.431	cg04395798	10	42971732	0.48918	11.3	0.03414	1.69e-27	N
rs2505801	10	42863120	A	C	0.431	cg04395798	10	42971732	0.48918	11.3	0.03414	1.69e-27	N
rs2505802	10	42863746	G	A	0.431	cg04395798	10	42971732	0.48918	11.3	0.03414	1.69e-27	N
rs2505804	10	42864554	T	C	0.431	cg04395798	10	42971732	0.48918	11.3	0.03414	1.69e-27	N
rs2505805	10	42866285	G	A	0.431	cg04395798	10	42971732	0.48918	11.3	0.03414	1.69e-27	N
rs2505813	10	42849171	C	G	0.431	cg04395798	10	42971732	0.48918	11.3	0.03414	1.69e-27	N
rs2505819	10	42846349	C	A	0.431	cg04395798	10	42971732	0.48918	11.3	0.03414	1.69e-27	N
rs2505820	10	42845918	G	A	0.431	cg04395798	10	42971732	0.48918	11.3	0.03414	1.69e-27	N
rs2505823	10	42840927	C	T	0.431	cg04395798	10	42971732	0.48918	11.3	0.03414	1.69e-27	N
rs2505824	10	42838236	A	C	0.431	cg04395798	10	42971732	0.48918	11.3	0.03414	1.69e-27	N
rs2505825	10	42838175	A	G	0.431	cg04395798	10	42971732	0.48918	11.3	0.03414	1.69e-27	N
rs2505830	10	42835341	A	G	0.431	cg04395798	10	42971732	0.48918	11.3	0.03414	1.69e-27	N
rs2505833	10	42821007	A	G	0.431	cg04395798	10	42971732	0.48918	11.3	0.03414	1.69e-27	N
rs2505835	10	42823599	A	G	0.431	cg04395798	10	42971732	0.48918	11.3	0.03414	1.69e-27	N
rs2505836	10	42825297	A	T	0.431	cg04395798	10	42971732	0.48918	11.3	0.03414	1.69e-27	N
rs2505837	10	42826516	G	A	0.431	cg04395798	10	42971732	0.48918	11.3	0.03414	1.69e-27	N
rs3004223	10	42848705	C	G	0.431	cg04395798	10	42971732	0.48918	11.3	0.03414	1.69e-27	N
rs3004224	10	42845087	G	A	0.431	cg04395798	10	42971732	0.48918	11.3	0.03414	1.69e-27	N
rs3004225	10	42836101	A	C	0.431	cg04395798	10	42971732	0.48918	11.3	0.03414	1.69e-27	N
rs4402248	10	42847125	G	T	0.431	cg04395798	10	42971732	0.48918	11.3	0.03414	1.69e-27	N
rs77378430	10	42872224	A	G	0.431	cg04395798	10	42971732	0.48918	11.3	0.03414	1.69e-27	N
rs9804362	10	42829668	A	C	0.431	cg04395798	10	42971732	0.48918	11.3	0.03414	1.69e-27	N
rs9663438	10	42615144	T	C	0.417	cg04395798	10	42971732	-0.50115	-11.2976	0.03235	1.72e-27	N
rs11266155	10	42422535	C	G	0.462	cg04395798	10	42971732	-0.48942	-11.297	0.03451	1.74e-27	N
rs1608194	10	42471859	A	G	0.463	cg04395798	10	42971732	-0.49129	-11.2963	0.03464	1.75e-27	N
rs28498916	10	42606880	C	G	0.46	cg04395798	10	42971732	-0.49436	-11.2951	0.03467	1.77e-27	N
rs10908952	10	42458352	G	A	0.476	cg16633951	10	42971575	0.48214	11.2936	0.05188	1.79e-27	N
rs3731783	2	231913056	T	C	0.16	cg27665808	2	232055229	0.65413	11.2936	0.07498	1.79e-27	N
rs7918770	10	42608212	T	C	0.425	cg04395798	10	42971732	0.48349	11.2915	0.03531	1.83e-27	N
rs1255404	10	42978025	T	G	0.427	cg16633951	10	42971575	0.4802	11.2878	0.04463	1.9e-27	N
rs11239560	10	42943101	C	T	0.363	cg16633951	10	42971575	0.49012	11.2842	0.04841	1.96e-27	N
rs2801947	10	42951740	A	G	0.363	cg16633951	10	42971575	0.49012	11.2842	0.04841	1.96e-27	N
rs143538253	10	42437833	C	A	0.463	cg04395798	10	42971732	-0.49077	-11.2822	0.03464	2e-27	N
rs9703868	10	42523670	A	C	0.412	cg16633951	10	42971575	-0.48179	-11.2821	0.04458	2.01e-27	N
rs11511701	10	42397373	T	G	0.47	cg16633951	10	42971575	0.48268	11.2781	0.05219	2.08e-27	N
rs12434277	14	104363709	T	C	0.03	cg22994272	14	104346241	1.35037	11.2785	0	2.08e-27	N
rs9702130	10	42403710	G	A	0.476	cg16633951	10	42971575	-0.49807	-11.2781	0.04913	2.09e-27	N
rs10736826	10	42788519	C	A	0.407	cg16633951	10	42971575	-0.48989	-11.2773	0.04572	2.1e-27	N
rs2335057	10	42445690	T	G	0.448	cg16633951	10	42971575	0.4851	11.2764	0.05454	2.12e-27	N
rs2489686	10	42869769	C	T	0.433	cg16633951	10	42971575	0.48875	11.2762	0.05195	2.12e-27	N
rs1304263	10	42481742	G	T	0.416	cg16633951	10	42971575	-0.47849	-11.2727	0.04418	2.2e-27	N
rs139504847	10	42439326	A	G	0.473	cg16633951	10	42971575	0.48086	11.2705	0.0516	2.25e-27	N
rs9664757	10	42489266	T	G	0.464	cg04395798	10	42971732	-0.49217	-11.2685	0.03453	2.29e-27	N
rs58562345	7	64415252	A	G	0.488	cg12143784	7	64541923	-0.48458	-11.2669	0.02213	2.33e-27	N
rs11239366	10	42901588	A	G	0.369	cg16633951	10	42971575	0.48985	11.2653	0.05323	2.36e-27	N
rs2419673	10	42930394	G	T	0.369	cg16633951	10	42971575	0.48985	11.2653	0.05323	2.36e-27	N
rs4948682	10	42916042	C	T	0.369	cg16633951	10	42971575	0.48985	11.2653	0.05323	2.36e-27	N
rs75852591	10	42898693	T	C	0.369	cg16633951	10	42971575	0.48985	11.2653	0.05323	2.36e-27	N
rs9769809	7	64956889	T	C	0.491	cg12143784	7	64541923	-0.50295	-11.2619	0.02384	2.44e-27	N
rs12765826	10	42918251	T	G	0.369	cg16633951	10	42971575	0.48926	11.2578	0.05293	2.54e-27	N
rs1937996	10	42937056	G	A	0.369	cg16633951	10	42971575	0.48926	11.2578	0.05293	2.54e-27	N
rs2420004	10	42911413	A	G	0.369	cg16633951	10	42971575	0.48926	11.2578	0.05293	2.54e-27	N
rs2801014	10	42937495	T	C	0.369	cg16633951	10	42971575	0.48926	11.2578	0.05293	2.54e-27	N
rs2801022	10	42923364	A	G	0.369	cg16633951	10	42971575	0.48926	11.2578	0.05293	2.54e-27	N
rs2801945	10	42925057	A	T	0.369	cg16633951	10	42971575	0.48926	11.2578	0.05293	2.54e-27	N
rs2801946	10	42925108	C	A	0.369	cg16633951	10	42971575	0.48926	11.2578	0.05293	2.54e-27	N
rs2996690	10	42927730	T	C	0.369	cg16633951	10	42971575	0.48926	11.2578	0.05293	2.54e-27	N
rs3895215	10	42899080	A	G	0.369	cg16633951	10	42971575	0.48926	11.2578	0.05293	2.54e-27	N
rs3981436	10	42931011	A	G	0.369	cg16633951	10	42971575	0.48926	11.2578	0.05293	2.54e-27	N
rs66977053	10	42926170	D	R	0.369	cg16633951	10	42971575	0.48926	11.2578	0.05293	2.54e-27	N
rs2335173	10	42413892	T	C	0.414	cg16633951	10	42971575	-0.47993	-11.255	0.04481	2.61e-27	N
rs4307671	10	42784382	G	A	0.429	cg04395798	10	42971732	0.4874	11.2541	0.03403	2.63e-27	N
rs7097728	10	42784062	A	G	0.429	cg04395798	10	42971732	0.4874	11.2541	0.03403	2.63e-27	N
rs2489699	10	42843933	A	G	0.436	cg16633951	10	42971575	0.48901	11.2541	0.05439	2.63e-27	N
rs189869033	10	42440313	C	T	0.464	cg04395798	10	42971732	-0.49073	-11.2507	0.03467	2.72e-27	N
rs7899877	10	42633769	A	G	0.438	cg16633951	10	42971575	0.48637	11.2503	0.05293	2.74e-27	N
rs4509708	10	42614561	G	A	0.436	cg16633951	10	42971575	0.48815	11.2441	0.05098	2.91e-27	N
rs79802588	10	42638556	T	G	0.436	cg16633951	10	42971575	0.48815	11.2441	0.05098	2.91e-27	N
rs11284178	10	42861255	D	R	0.436	cg16633951	10	42971575	0.48598	11.2432	0.05342	2.93e-27	N
rs28575392	10	42606543	A	G	0.416	cg04395798	10	42971732	0.48368	11.2401	0.03434	3.02e-27	N
rs7075100	10	42606518	A	G	0.416	cg04395798	10	42971732	0.48368	11.2401	0.03434	3.02e-27	N
rs7251251	19	50294150	A	G	0.246	cg10751382	19	50391554	0.53542	11.2386	0.1279	3.06e-27	N
rs4046203	10	42464488	C	T	0.499	cg16633951	10	42971575	-0.48597	-11.2387	0.04702	3.06e-27	N
rs67090148	10	42928668	D	R	0.362	cg16633951	10	42971575	0.48973	11.2382	0.04813	3.08e-27	N
rs10900152	10	42886482	A	G	0.364	cg16633951	10	42971575	0.48898	11.2375	0.04841	3.1e-27	N
rs11524812	10	42886871	A	G	0.364	cg16633951	10	42971575	0.48898	11.2375	0.04841	3.1e-27	N
rs11528527	10	42882883	T	G	0.364	cg16633951	10	42971575	0.48898	11.2375	0.04841	3.1e-27	N
rs11528528	10	42882999	A	G	0.364	cg16633951	10	42971575	0.48898	11.2375	0.04841	3.1e-27	N
rs11528529	10	42883003	T	C	0.364	cg16633951	10	42971575	0.48898	11.2375	0.04841	3.1e-27	N
rs12414860	10	42882544	G	A	0.364	cg16633951	10	42971575	0.48898	11.2375	0.04841	3.1e-27	N
rs12414862	10	42882572	T	A	0.364	cg16633951	10	42971575	0.48898	11.2375	0.04841	3.1e-27	N
rs36052545	10	42883337	T	C	0.364	cg16633951	10	42971575	0.48898	11.2375	0.04841	3.1e-27	N
rs4245618	10	42890803	A	C	0.364	cg16633951	10	42971575	0.48898	11.2375	0.04841	3.1e-27	N
rs4949008	10	42884169	G	A	0.364	cg16633951	10	42971575	0.48898	11.2375	0.04841	3.1e-27	N
rs4949009	10	42885157	A	C	0.364	cg16633951	10	42971575	0.48898	11.2375	0.04841	3.1e-27	N
rs4949012	10	42889087	A	T	0.364	cg16633951	10	42971575	0.48898	11.2375	0.04841	3.1e-27	N
rs4949015	10	42894698	T	G	0.364	cg16633951	10	42971575	0.48898	11.2375	0.04841	3.1e-27	N
rs10908975	10	42494526	T	A	0.389	cg16633951	10	42971575	0.49239	11.2311	0.05356	3.3e-27	N
rs11266021	10	42503182	A	G	0.389	cg16633951	10	42971575	0.49239	11.2311	0.05356	3.3e-27	N
rs35188330	10	42501247	T	C	0.389	cg16633951	10	42971575	0.49239	11.2311	0.05356	3.3e-27	N
rs10900177	10	42905057	T	C	0.363	cg16633951	10	42971575	0.48841	11.2304	0.04834	3.32e-27	N
rs11239378	10	42905005	G	A	0.363	cg16633951	10	42971575	0.48841	11.2304	0.04834	3.32e-27	N
rs12268443	10	42895778	A	G	0.363	cg16633951	10	42971575	0.48841	11.2304	0.04834	3.32e-27	N
rs12768694	10	42887236	T	G	0.363	cg16633951	10	42971575	0.48841	11.2304	0.04834	3.32e-27	N
rs1892416	10	42929705	C	T	0.363	cg16633951	10	42971575	0.48841	11.2304	0.04834	3.32e-27	N
rs2154316	10	42939466	A	G	0.363	cg16633951	10	42971575	0.48841	11.2304	0.04834	3.32e-27	N
rs2419683	10	42902280	T	C	0.363	cg16633951	10	42971575	0.48841	11.2304	0.04834	3.32e-27	N
rs2420005	10	42911448	G	A	0.363	cg16633951	10	42971575	0.48841	11.2304	0.04834	3.32e-27	N
rs34188768	10	42922855	D	R	0.363	cg16633951	10	42971575	0.48841	11.2304	0.04834	3.32e-27	N
rs4408261	10	42903447	G	A	0.363	cg16633951	10	42971575	0.48841	11.2304	0.04834	3.32e-27	N
rs4409777	10	42897610	C	T	0.363	cg16633951	10	42971575	0.48841	11.2304	0.04834	3.32e-27	N
rs4514361	10	42890897	A	G	0.363	cg16633951	10	42971575	0.48841	11.2304	0.04834	3.32e-27	N
rs4948681	10	42895040	G	A	0.363	cg16633951	10	42971575	0.48841	11.2304	0.04834	3.32e-27	N
rs4949021	10	42919931	A	G	0.363	cg16633951	10	42971575	0.48841	11.2304	0.04834	3.32e-27	N
rs2505796	10	42851719	C	T	0.435	cg04395798	10	42971732	0.48593	11.2292	0.03376	3.36e-27	N
rs2505797	10	42851734	C	G	0.435	cg04395798	10	42971732	0.48593	11.2292	0.03376	3.36e-27	N
rs2505793	10	42812881	T	C	0.43	cg16633951	10	42971575	0.48638	11.2276	0.05001	3.41e-27	N
rs10430806	10	42522198	T	C	0.468	cg04395798	10	42971732	-0.48732	-11.2251	0.0343	3.49e-27	N
rs2489688	10	42873734	T	A	0.428	cg16633951	10	42971575	0.4836	11.2247	0.05096	3.51e-27	N
rs12775714	10	42468995	G	A	0.495	cg16633951	10	42971575	-0.48737	-11.2228	0.04746	3.57e-27	N
rs1851486	10	42466083	C	G	0.495	cg16633951	10	42971575	-0.48737	-11.2228	0.04746	3.57e-27	N
rs1851487	10	42465910	G	T	0.495	cg16633951	10	42971575	-0.48737	-11.2228	0.04746	3.57e-27	N
rs2173464	10	42454325	A	G	0.495	cg16633951	10	42971575	-0.48737	-11.2228	0.04746	3.57e-27	N
rs2334908	10	42464851	G	A	0.495	cg16633951	10	42971575	-0.48737	-11.2228	0.04746	3.57e-27	N
rs9663767	10	42465110	G	A	0.495	cg16633951	10	42971575	-0.48737	-11.2228	0.04746	3.57e-27	N
rs9664992	10	42465706	T	A	0.495	cg16633951	10	42971575	-0.48737	-11.2228	0.04746	3.57e-27	N
rs9663673	10	42447418	G	A	0.421	cg16633951	10	42971575	-0.4734	-11.2212	0.04482	3.63e-27	N
rs11528798	10	42482202	A	G	0.39	cg04395798	10	42971732	0.49102	11.2206	0.03555	3.65e-27	N
rs2201907	10	42473686	C	G	0.39	cg04395798	10	42971732	0.49102	11.2206	0.03555	3.65e-27	N
rs2878325	10	42484520	C	G	0.39	cg04395798	10	42971732	0.49102	11.2206	0.03555	3.65e-27	N
rs11266145	10	42410762	A	G	0.465	cg04395798	10	42971732	-0.48931	-11.218	0.03471	3.75e-27	N
rs1255392	10	43021089	A	T	0.325	cg04395798	10	42971732	0.49798	11.2157	0.03797	3.83e-27	N
rs139649430	10	42427814	D	R	0.469	cg04395798	10	42971732	-0.48668	-11.2126	0.03448	3.94e-27	N
rs9664985	10	42428682	G	A	0.469	cg04395798	10	42971732	-0.48668	-11.2126	0.03448	3.94e-27	N
rs9794187	10	42417591	A	G	0.466	cg16633951	10	42971575	0.48067	11.2106	0.05299	4.02e-27	N
rs2334910	10	42429369	T	A	0.414	cg16633951	10	42971575	-0.47786	-11.2097	0.04466	4.06e-27	N
rs2335062	10	42428190	T	G	0.471	cg16633951	10	42971575	0.47945	11.2095	0.05267	4.07e-27	N
rs2505799	10	42856194	G	T	0.394	cg16633951	10	42971575	-0.49755	-11.2088	0.04384	4.09e-27	N
rs10908976	10	42494927	C	T	0.473	cg16633951	10	42971575	0.47858	11.2085	0.0516	4.11e-27	N
rs10909020	10	42453530	C	T	0.473	cg16633951	10	42971575	0.47858	11.2085	0.0516	4.11e-27	N
rs11528772	10	42520955	C	T	0.473	cg16633951	10	42971575	0.47858	11.2085	0.0516	4.11e-27	N
rs11528887	10	42452338	G	A	0.473	cg16633951	10	42971575	0.47858	11.2085	0.0516	4.11e-27	N
rs1581424	10	42471440	C	G	0.473	cg16633951	10	42971575	0.47858	11.2085	0.0516	4.11e-27	N
rs1608195	10	42471522	A	G	0.473	cg16633951	10	42971575	0.47858	11.2085	0.0516	4.11e-27	N
rs1608200	10	42456779	C	A	0.473	cg16633951	10	42971575	0.47858	11.2085	0.0516	4.11e-27	N
rs1916121	10	42504463	T	A	0.418	cg16633951	10	42971575	-0.47573	-11.2082	0.04457	4.12e-27	N
rs7908559	10	42607909	T	C	0.462	cg04395798	10	42971732	-0.48942	-11.205	0.03469	4.25e-27	N
rs10899776	10	42607692	T	C	0.42	cg04395798	10	42971732	0.48064	11.2041	0.03436	4.28e-27	N
rs10899777	10	42607697	A	G	0.42	cg04395798	10	42971732	0.48064	11.2041	0.03436	4.28e-27	N
rs200616719	10	42843299	I	R	0.434	cg16633951	10	42971575	0.48437	11.2034	0.05195	4.32e-27	N
rs62637067	10	42809526	C	T	0.455	cg04395798	10	42971732	-0.49044	-11.2021	0.03431	4.37e-27	N
rs2334906	10	42510955	C	T	0.47	cg16633951	10	42971575	0.47435	11.2013	0.05137	4.4e-27	N
rs2505811	10	42872833	C	G	0.414	cg16633951	10	42971575	-0.48041	-11.1998	0.04457	4.47e-27	N
rs9663131	10	42444226	T	C	0.458	cg16633951	10	42971575	0.47898	11.1971	0.05289	4.59e-27	N
rs2489685	10	42864138	A	G	0.434	cg16633951	10	42971575	0.48362	11.1957	0.05147	4.65e-27	N
rs9732766	10	42489708	T	C	0.463	cg04395798	10	42971732	-0.48741	-11.1923	0.03468	4.8e-27	N
rs9703043	10	42433540	C	T	0.415	cg16633951	10	42971575	-0.47761	-11.1919	0.04451	4.82e-27	N
rs9731117	10	42434644	G	C	0.415	cg16633951	10	42971575	-0.47761	-11.1919	0.04451	4.82e-27	N
rs147475896	10	42838391	I	R	0.431	cg16633951	10	42971575	0.48546	11.1905	0.04952	4.89e-27	N
rs200567413	10	42838398	D	R	0.431	cg16633951	10	42971575	0.48546	11.1905	0.04952	4.89e-27	N
rs2466469	10	42838219	C	T	0.431	cg16633951	10	42971575	0.48546	11.1905	0.04952	4.89e-27	N
rs2466470	10	42838914	C	T	0.431	cg16633951	10	42971575	0.48546	11.1905	0.04952	4.89e-27	N
rs2466471	10	42842610	T	C	0.431	cg16633951	10	42971575	0.48546	11.1905	0.04952	4.89e-27	N
rs2466472	10	42853424	G	A	0.431	cg16633951	10	42971575	0.48546	11.1905	0.04952	4.89e-27	N
rs2466473	10	42854816	A	C	0.431	cg16633951	10	42971575	0.48546	11.1905	0.04952	4.89e-27	N
rs2466476	10	42856384	C	T	0.431	cg16633951	10	42971575	0.48546	11.1905	0.04952	4.89e-27	N
rs2466477	10	42857883	T	C	0.431	cg16633951	10	42971575	0.48546	11.1905	0.04952	4.89e-27	N
rs2466478	10	42858154	A	G	0.431	cg16633951	10	42971575	0.48546	11.1905	0.04952	4.89e-27	N
rs2466480	10	42859060	C	T	0.431	cg16633951	10	42971575	0.48546	11.1905	0.04952	4.89e-27	N
rs2466488	10	42868177	A	G	0.431	cg16633951	10	42971575	0.48546	11.1905	0.04952	4.89e-27	N
rs2489680	10	42844542	C	T	0.431	cg16633951	10	42971575	0.48546	11.1905	0.04952	4.89e-27	N
rs2489683	10	42857854	T	G	0.431	cg16633951	10	42971575	0.48546	11.1905	0.04952	4.89e-27	N
rs2489716	10	42844126	A	G	0.431	cg16633951	10	42971575	0.48546	11.1905	0.04952	4.89e-27	N
rs2505798	10	42813846	T	C	0.431	cg16633951	10	42971575	0.48546	11.1905	0.04952	4.89e-27	N
rs2505801	10	42863120	A	C	0.431	cg16633951	10	42971575	0.48546	11.1905	0.04952	4.89e-27	N
rs2505802	10	42863746	G	A	0.431	cg16633951	10	42971575	0.48546	11.1905	0.04952	4.89e-27	N
rs2505804	10	42864554	T	C	0.431	cg16633951	10	42971575	0.48546	11.1905	0.04952	4.89e-27	N
rs2505805	10	42866285	G	A	0.431	cg16633951	10	42971575	0.48546	11.1905	0.04952	4.89e-27	N
rs2505813	10	42849171	C	G	0.431	cg16633951	10	42971575	0.48546	11.1905	0.04952	4.89e-27	N
rs2505819	10	42846349	C	A	0.431	cg16633951	10	42971575	0.48546	11.1905	0.04952	4.89e-27	N
rs2505820	10	42845918	G	A	0.431	cg16633951	10	42971575	0.48546	11.1905	0.04952	4.89e-27	N
rs2505823	10	42840927	C	T	0.431	cg16633951	10	42971575	0.48546	11.1905	0.04952	4.89e-27	N
rs2505824	10	42838236	A	C	0.431	cg16633951	10	42971575	0.48546	11.1905	0.04952	4.89e-27	N
rs2505825	10	42838175	A	G	0.431	cg16633951	10	42971575	0.48546	11.1905	0.04952	4.89e-27	N
rs2505830	10	42835341	A	G	0.431	cg16633951	10	42971575	0.48546	11.1905	0.04952	4.89e-27	N
rs2505833	10	42821007	A	G	0.431	cg16633951	10	42971575	0.48546	11.1905	0.04952	4.89e-27	N
rs2505835	10	42823599	A	G	0.431	cg16633951	10	42971575	0.48546	11.1905	0.04952	4.89e-27	N
rs2505836	10	42825297	A	T	0.431	cg16633951	10	42971575	0.48546	11.1905	0.04952	4.89e-27	N
rs2505837	10	42826516	G	A	0.431	cg16633951	10	42971575	0.48546	11.1905	0.04952	4.89e-27	N
rs3004223	10	42848705	C	G	0.431	cg16633951	10	42971575	0.48546	11.1905	0.04952	4.89e-27	N
rs3004224	10	42845087	G	A	0.431	cg16633951	10	42971575	0.48546	11.1905	0.04952	4.89e-27	N
rs3004225	10	42836101	A	C	0.431	cg16633951	10	42971575	0.48546	11.1905	0.04952	4.89e-27	N
rs4402248	10	42847125	G	T	0.431	cg16633951	10	42971575	0.48546	11.1905	0.04952	4.89e-27	N
rs77378430	10	42872224	A	G	0.431	cg16633951	10	42971575	0.48546	11.1905	0.04952	4.89e-27	N
rs9804362	10	42829668	A	C	0.431	cg16633951	10	42971575	0.48546	11.1905	0.04952	4.89e-27	N
rs28404483	10	42606751	A	G	0.42	cg04395798	10	42971732	0.48012	11.1901	0.03374	4.91e-27	N
rs9794553	10	42525497	A	T	0.406	cg16633951	10	42971575	0.48553	11.1887	0.05364	4.97e-27	N
rs11528798	10	42482202	A	G	0.39	cg16633951	10	42971575	0.49014	11.1878	0.05352	5.02e-27	N
rs2201907	10	42473686	C	G	0.39	cg16633951	10	42971575	0.49014	11.1878	0.05352	5.02e-27	N
rs2878325	10	42484520	C	G	0.39	cg16633951	10	42971575	0.49014	11.1878	0.05352	5.02e-27	N
rs12220843	10	42434323	A	T	0.471	cg16633951	10	42971575	0.47864	11.1875	0.05267	5.03e-27	N
rs2335056	10	42467305	T	G	0.487	cg16633951	10	42971575	-0.49034	-11.1871	0.04758	5.05e-27	N
rs9794197	10	42479198	T	C	0.487	cg16633951	10	42971575	-0.49034	-11.1871	0.04758	5.05e-27	N
rs4802634	19	50377757	T	C	0.447	cg11625877	19	50391885	0.49307	11.1861	0.11461	5.1e-27	N
rs151072462	10	42487558	A	C	0.436	cg16633951	10	42971575	-0.47189	-11.1842	0.04482	5.2e-27	N
rs9731508	10	42489645	T	G	0.473	cg16633951	10	42971575	0.47831	11.1823	0.05209	5.29e-27	N
rs140207087	7	64948668	C	A	0.489	cg12143784	7	64541923	-0.49989	-11.1796	0.02384	5.43e-27	N
rs12269267	10	42434410	A	G	0.464	cg04395798	10	42971732	-0.48672	-11.1792	0.03475	5.46e-27	N
rs1044167	19	50414717	T	C	0.306	cg10751382	19	50391554	-0.50628	-11.179	0.09375	5.47e-27	N
rs9794037	10	42417750	T	C	0.467	cg04395798	10	42971732	-0.48764	-11.1784	0.03469	5.5e-27	N
rs12623587	2	232160554	A	C	0.303	cg07929768	2	232055508	0.52173	11.1741	0.03014	5.73e-27	N
rs1818811	10	42509506	G	C	0.423	cg04395798	10	42971732	-0.47287	-11.1699	0.0329	5.97e-27	N
rs11266165	10	42430642	C	T	0.474	cg16633951	10	42971575	0.47766	11.1682	0.05317	6.07e-27	N
rs7251695	19	50294641	T	C	0.193	cg10751382	19	50391554	0.58572	11.1637	0.12846	6.34e-27	N
rs4293079	10	42782446	A	G	0.443	cg04395798	10	42971732	-0.49282	-11.1625	0.03448	6.41e-27	N
rs9663774	10	42517060	C	T	0.486	cg04395798	10	42971732	-0.48322	-11.1624	0.03467	6.42e-27	N
rs55782278	2	232154412	A	G	0.303	cg07929768	2	232055508	0.52122	11.1612	0.0301	6.49e-27	N
rs7918771	10	42608215	A	T	0.459	cg04395798	10	42971732	-0.48476	-11.1548	0.03471	6.91e-27	N
rs10900244	10	42639323	T	C	0.42	cg04395798	10	42971732	0.49376	11.1532	0.03244	7.02e-27	N
rs3731779	2	232158885	T	C	0.304	cg07929768	2	232055508	0.52104	11.1529	0.03012	7.04e-27	N
rs9663448	10	42444488	T	G	0.412	cg16633951	10	42971575	-0.47684	-11.1474	0.04427	7.42e-27	N
rs4609560	10	42698670	A	G	0.453	cg16633951	10	42971575	-0.49323	-11.1448	0.04482	7.61e-27	N
rs7899877	10	42633769	A	G	0.438	cg04395798	10	42971732	0.48205	11.1433	0.03384	7.72e-27	N
rs10909010	10	42435593	A	G	0.469	cg16633951	10	42971575	0.47981	11.1425	0.05171	7.78e-27	N
rs6748332	2	231914845	T	C	0.214	cg27665808	2	232055229	0.58311	11.1389	0.07356	8.06e-27	N
rs2290774	19	50375035	C	T	0.438	cg11625877	19	50391885	0.49233	11.1356	0.1124	8.32e-27	N
rs59886973	2	232137284	C	T	0.319	cg07929768	2	232055508	0.51179	11.1355	0.03131	8.33e-27	N
rs1589585	10	42514323	G	A	0.418	cg16633951	10	42971575	-0.4706	-11.1341	0.04427	8.44e-27	N
rs11517394	10	42444888	C	T	0.456	cg16633951	10	42971575	0.47871	11.1296	0.05297	8.81e-27	N
rs11238471	10	42607602	T	C	0.476	cg16633951	10	42971575	0.4753	11.1259	0.05113	9.14e-27	N
rs62193693	2	231906993	A	C	0.165	cg27665808	2	232055229	0.64055	11.1248	0.07476	9.23e-27	N
rs111581172	14	104363671	A	G	0.031	cg22994272	14	104346241	1.32203	11.1248	0	9.24e-27	N
rs115277592	7	64970467	T	C	0.489	cg12143784	7	64541923	-0.49697	-11.1226	0.02378	9.44e-27	N
rs116809535	7	64970341	T	G	0.489	cg12143784	7	64541923	-0.49697	-11.1226	0.02378	9.44e-27	N
rs117463285	7	64969316	T	C	0.489	cg12143784	7	64541923	-0.49697	-11.1226	0.02378	9.44e-27	N
rs6968830	7	64953489	A	C	0.489	cg12143784	7	64541923	-0.49697	-11.1226	0.02378	9.44e-27	N
rs34562736	10	43111354	D	R	0.462	cg04395798	10	42971732	0.46985	11.1221	0.03676	9.48e-27	N
rs10909022	10	42454909	T	C	0.497	cg16633951	10	42971575	-0.48291	-11.1216	0.04679	9.52e-27	N
rs12242679	10	42635791	A	T	0.429	cg04395798	10	42971732	-0.49801	-11.1212	0.03336	9.56e-27	N
rs10908975	10	42494526	T	A	0.389	cg04395798	10	42971732	0.48781	11.1191	0.03486	9.76e-27	N
rs11266021	10	42503182	A	G	0.389	cg04395798	10	42971732	0.48781	11.1191	0.03486	9.76e-27	N
rs35188330	10	42501247	T	C	0.389	cg04395798	10	42971732	0.48781	11.1191	0.03486	9.76e-27	N
rs1255413	10	43066414	T	C	0.366	cg04395798	10	42971732	0.47919	11.1182	0.03815	9.84e-27	N
rs150848131	7	64948115	C	G	0.487	cg12143784	7	64541923	-0.49676	-11.1138	0.02366	1.03e-26	N
rs113602427	14	104413705	T	C	0.029	cg22994272	14	104346241	1.35942	11.1122	0	1.04e-26	N
rs181934531	14	104413697	T	C	0.029	cg22994272	14	104346241	1.35942	11.1122	0	1.04e-26	N
rs186276623	14	104413698	G	T	0.029	cg22994272	14	104346241	1.35942	11.1122	0	1.04e-26	N
rs4307671	10	42784382	G	A	0.429	cg16633951	10	42971575	0.48242	11.1112	0.05099	1.05e-26	N
rs7097728	10	42784062	A	G	0.429	cg16633951	10	42971575	0.48242	11.1112	0.05099	1.05e-26	N
rs4486580	10	42618584	T	C	0.452	cg16633951	10	42971575	0.47346	11.1109	0.05038	1.06e-26	N
rs10276164	7	64966197	G	C	0.489	cg12143784	7	64541923	-0.49559	-11.1038	0.02367	1.13e-26	N
rs138969068	7	64949059	A	C	0.489	cg12143784	7	64541923	-0.49559	-11.1038	0.02367	1.13e-26	N
rs6978513	7	64967236	G	A	0.489	cg12143784	7	64541923	-0.49559	-11.1038	0.02367	1.13e-26	N
rs7781762	7	64949877	A	C	0.489	cg12143784	7	64541923	-0.49559	-11.1038	0.02367	1.13e-26	N
rs10909013	10	42436914	T	C	0.414	cg16633951	10	42971575	-0.47397	-11.1039	0.04418	1.13e-26	N
rs11266168	10	42436486	T	C	0.414	cg16633951	10	42971575	-0.47397	-11.1039	0.04418	1.13e-26	N
rs148049723	7	64947544	T	C	0.477	cg12143784	7	64541923	-0.49299	-11.1022	0.02355	1.15e-26	N
rs4580930	7	64945709	C	T	0.477	cg12143784	7	64541923	-0.49299	-11.1022	0.02355	1.15e-26	N
rs12476928	2	113370494	G	A	0.461	cg09133511	2	113384907	-0.34648	-11.0996	0.01036	1.18e-26	N
rs62129183	19	50303613	C	G	0.166	cg10751382	19	50391554	0.6221	11.0927	0.1487	1.26e-26	N
rs149943841	10	42488257	T	A	0.386	cg16633951	10	42971575	0.48979	11.0929	0.05366	1.26e-26	N
rs34615570	7	64734385	R	D	0.496	cg12143784	7	64541923	0.49216	11.0915	0.02272	1.27e-26	N
rs6460231	7	64730985	C	T	0.496	cg12143784	7	64541923	0.49216	11.0915	0.02272	1.27e-26	N
rs11266158	10	42425569	A	T	0.48	cg16633951	10	42971575	0.47361	11.0917	0.05068	1.27e-26	N
rs62193692	2	231906485	T	G	0.165	cg27665808	2	232055229	0.63937	11.0898	0.07483	1.29e-26	N
rs10900238	10	42635908	T	A	0.425	cg04395798	10	42971732	0.48359	11.0861	0.03285	1.34e-26	N
rs11265969	10	42455615	T	C	0.489	cg16633951	10	42971575	-0.48565	-11.0832	0.0468	1.38e-26	N
rs11076210	16	58008617	A	G	0.159	cg00491255	16	58019984	-0.63877	-11.08	0.04369	1.42e-26	N
rs1864159	16	58011491	A	G	0.159	cg00491255	16	58019984	-0.63877	-11.08	0.04369	1.42e-26	N
rs4784020	16	58010708	T	C	0.159	cg00491255	16	58019984	-0.63877	-11.08	0.04369	1.42e-26	N
rs1851490	10	42456692	G	C	0.47	cg04395798	10	42971732	-0.48098	-11.0798	0.0339	1.42e-26	N
rs4509708	10	42614561	G	A	0.436	cg04395798	10	42971732	0.48155	11.0769	0.0337	1.47e-26	N
rs79802588	10	42638556	T	G	0.436	cg04395798	10	42971732	0.48155	11.0769	0.0337	1.47e-26	N
rs11266159	10	42425959	G	T	0.483	cg16633951	10	42971575	0.47203	11.0534	0.05147	1.84e-26	N
rs75478119	19	50358133	G	T	0.329	cg10751382	19	50391554	0.48735	11.0491	0.12314	1.91e-26	N
rs6437004	2	232051465	G	T	0.319	cg27665808	2	232055229	0.51352	11.0488	0.05898	1.92e-26	N
rs34628100	10	42450841	C	A	0.488	cg04395798	10	42971732	-0.48321	-11.0445	0.03415	2e-26	N
rs10257262	7	64957539	A	T	0.489	cg12143784	7	64541923	-0.49466	-11.0439	0.02359	2.01e-26	N
rs9422470	10	42931825	T	C	0.36	cg16633951	10	42971575	0.48154	11.0435	0.04994	2.02e-26	N
rs10908961	10	42469894	A	G	0.468	cg04395798	10	42971732	-0.47964	-11.0397	0.0343	2.1e-26	N
rs9665476	10	42492751	A	T	0.468	cg04395798	10	42971732	-0.47964	-11.0397	0.0343	2.1e-26	N
rs11239114	10	42839105	G	A	0.413	cg04395798	10	42971732	-0.4792	-11.0391	0.03168	2.11e-26	N
rs12411871	10	42839095	C	A	0.413	cg04395798	10	42971732	-0.4792	-11.0391	0.03168	2.11e-26	N
rs2466475	10	42856143	C	A	0.413	cg04395798	10	42971732	-0.4792	-11.0391	0.03168	2.11e-26	N
rs2466481	10	42859628	G	A	0.413	cg04395798	10	42971732	-0.4792	-11.0391	0.03168	2.11e-26	N
rs2489684	10	42862079	C	T	0.413	cg04395798	10	42971732	-0.4792	-11.0391	0.03168	2.11e-26	N
rs2505803	10	42864101	C	A	0.413	cg04395798	10	42971732	-0.4792	-11.0391	0.03168	2.11e-26	N
rs2505828	10	42836627	A	G	0.413	cg04395798	10	42971732	-0.4792	-11.0391	0.03168	2.11e-26	N
rs2505838	10	42827951	A	G	0.413	cg04395798	10	42971732	-0.4792	-11.0391	0.03168	2.11e-26	N
rs10909021	10	42454677	T	C	0.484	cg16633951	10	42971575	0.48415	11.0378	0.04634	2.13e-26	N
rs3810267	19	50379053	G	A	0.443	cg11625877	19	50391885	0.48883	11.036	0.11123	2.17e-26	N
rs7258104	19	50299757	G	A	0.485	cg14071503	19	50391752	0.4602	11.0316	0.04582	2.27e-26	N
rs10908962	10	42470182	C	T	0.488	cg16633951	10	42971575	-0.48362	-11.0278	0.04737	2.35e-26	N
rs10908963	10	42470237	C	T	0.488	cg16633951	10	42971575	-0.48362	-11.0278	0.04737	2.35e-26	N
rs10908964	10	42470601	C	T	0.488	cg16633951	10	42971575	-0.48362	-11.0278	0.04737	2.35e-26	N
rs10908965	10	42470991	C	T	0.488	cg16633951	10	42971575	-0.48362	-11.0278	0.04737	2.35e-26	N
rs10908966	10	42471138	C	T	0.488	cg16633951	10	42971575	-0.48362	-11.0278	0.04737	2.35e-26	N
rs2466466	10	42832578	T	G	0.408	cg04395798	10	42971732	-0.48147	-11.016	0.03138	2.63e-26	N
rs1290649	19	50368361	A	T	0.41	cg11625877	19	50391885	0.48737	11.0117	0.10751	2.74e-26	N
rs77173244	10	42487926	A	C	0.499	cg16633951	10	42971575	0.48139	11.0116	0.0466	2.75e-26	N
rs78458906	10	42487919	T	C	0.499	cg16633951	10	42971575	0.48139	11.0116	0.0466	2.75e-26	N
rs4801807	19	50313806	G	A	0.483	cg14071503	19	50391752	0.46004	11.0071	0.04615	2.87e-26	N
rs11641774	16	58006065	G	C	0.16	cg00491255	16	58019984	-0.634	-11.0067	0.03992	2.88e-26	N
rs2473112	10	43094357	C	T	0.365	cg04395798	10	42971732	0.47444	11.0064	0.03815	2.89e-26	N
rs75428157	10	42822757	D	R	0.412	cg04395798	10	42971732	-0.47851	-10.9975	0.03182	3.14e-26	N
rs4368335	2	113389864	C	A	0.452	cg09133511	2	113384907	-0.34218	-10.9972	0.00966	3.15e-26	N
rs1255414	10	43057681	C	T	0.355	cg04395798	10	42971732	0.47744	10.9963	0.03795	3.18e-26	N
rs2473115	10	43122649	G	A	0.365	cg04395798	10	42971732	0.47365	10.9929	0.0381	3.28e-26	N
rs10900244	10	42639323	T	C	0.42	cg16633951	10	42971575	0.48798	10.9927	0.05212	3.29e-26	N
rs2257103	19	50370066	T	C	0.411	cg11625877	19	50391885	0.48566	10.9906	0.10643	3.36e-26	N
rs35743012	2	113371982	T	A	0.444	cg09133511	2	113384907	-0.34547	-10.9875	0.00995	3.46e-26	N
rs10908967	10	42476873	T	C	0.489	cg04395798	10	42971732	-0.48027	-10.9863	0.03375	3.5e-26	N
rs10272849	7	64957126	G	A	0.498	cg12143784	7	64541923	-0.492	-10.9817	0.02344	3.66e-26	N
rs209394	10	43142034	A	G	0.357	cg16633951	10	42971575	0.4717	10.9807	0.04645	3.69e-26	N
rs2954825	10	42836158	C	G	0.408	cg04395798	10	42971732	-0.47921	-10.9795	0.0322	3.73e-26	N
rs9794762	10	42417678	T	C	0.462	cg16633951	10	42971575	0.47651	10.9765	0.05239	3.84e-26	N
rs10736826	10	42788519	C	A	0.407	cg04395798	10	42971732	-0.47826	-10.9763	0.03193	3.85e-26	N
rs10214965	7	64738517	T	C	0.496	cg12143784	7	64541923	0.48833	10.9742	0.02288	3.93e-26	N
rs10214971	7	64738754	T	C	0.496	cg12143784	7	64541923	0.48833	10.9742	0.02288	3.93e-26	N
rs10231956	7	64762394	G	A	0.496	cg12143784	7	64541923	0.48833	10.9742	0.02288	3.93e-26	N
rs3846968	7	64733634	G	C	0.496	cg12143784	7	64541923	0.48833	10.9742	0.02288	3.93e-26	N
rs3846969	7	64733683	G	A	0.496	cg12143784	7	64541923	0.48833	10.9742	0.02288	3.93e-26	N
rs9664608	10	42615543	G	T	0.494	cg16633951	10	42971575	0.4781	10.9742	0.05123	3.93e-26	N
rs11767204	7	64515904	G	A	0.442	cg12143784	7	64541923	0.48102	10.9659	0.02133	4.25e-26	N
rs2504025	10	43118592	A	G	0.357	cg04395798	10	42971732	0.47332	10.9588	0.03787	4.55e-26	N
rs34366908	10	43099244	D	R	0.357	cg04395798	10	42971732	0.47332	10.9588	0.03787	4.55e-26	N
rs34604661	10	43096373	D	R	0.357	cg04395798	10	42971732	0.47332	10.9588	0.03787	4.55e-26	N
rs55821134	10	42463305	T	A	0.476	cg04395798	10	42971732	0.46456	10.9572	0.03438	4.62e-26	N
rs149943841	10	42488257	T	A	0.386	cg04395798	10	42971732	0.48425	10.9569	0.0348	4.63e-26	N
rs3760709	19	50371399	A	G	0.452	cg11625877	19	50391885	0.48103	10.9555	0.11341	4.7e-26	N
rs71299640	10	43098307	I	R	0.357	cg04395798	10	42971732	0.47289	10.9548	0.03785	4.73e-26	N
rs1147917	10	43078973	A	G	0.356	cg04395798	10	42971732	0.47256	10.953	0.03787	4.81e-26	N
rs58137534	19	50375446	G	C	0.438	cg11625877	19	50391885	0.48469	10.9512	0.11261	4.89e-26	N
rs8112830	19	50375447	G	A	0.438	cg11625877	19	50391885	0.48469	10.9512	0.11261	4.89e-26	N
rs4849079	2	113369884	C	G	0.445	cg09133511	2	113384907	-0.34421	-10.9477	0.00977	5.06e-26	N
rs1147918	10	43090783	C	T	0.366	cg04395798	10	42971732	0.47248	10.946	0.0381	5.14e-26	N
rs1147919	10	43091958	C	T	0.366	cg04395798	10	42971732	0.47248	10.946	0.0381	5.14e-26	N
rs9794218	10	42474871	T	G	0.461	cg04395798	10	42971732	-0.47464	-10.9448	0.03227	5.2e-26	N
rs10793527	10	42809940	T	C	0.438	cg16633951	10	42971575	0.47558	10.9358	0.05033	5.67e-26	N
rs1255395	10	43035925	C	T	0.363	cg04395798	10	42971732	0.4734	10.9343	0.0381	5.75e-26	N
rs6437001	2	232013304	T	G	0.312	cg27665808	2	232055229	0.50808	10.9337	0.05738	5.79e-26	N
rs9794553	10	42525497	A	T	0.406	cg04395798	10	42971732	0.47548	10.93	0.03418	5.99e-26	N
rs11768265	7	64746860	T	A	0.497	cg12143784	7	64541923	0.48591	10.9291	0.02275	6.04e-26	N
rs201053915	7	64755521	R	I	0.497	cg12143784	7	64541923	0.48591	10.9291	0.02275	6.04e-26	N
rs3857675	7	64730604	G	A	0.497	cg12143784	7	64541923	0.48591	10.9291	0.02275	6.04e-26	N
rs3981856	7	64759556	C	T	0.497	cg12143784	7	64541923	0.48591	10.9291	0.02275	6.04e-26	N
rs4717244	7	64734122	T	C	0.497	cg12143784	7	64541923	0.48591	10.9291	0.02275	6.04e-26	N
rs62470344	7	64746752	C	G	0.497	cg12143784	7	64541923	0.48591	10.9291	0.02275	6.04e-26	N
rs6953941	7	64738074	C	T	0.497	cg12143784	7	64541923	0.48591	10.9291	0.02275	6.04e-26	N
rs6956221	7	64751148	G	A	0.497	cg12143784	7	64541923	0.48591	10.9291	0.02275	6.04e-26	N
rs6964195	7	64734607	G	A	0.497	cg12143784	7	64541923	0.48591	10.9291	0.02275	6.04e-26	N
rs1147916	10	43071281	A	G	0.357	cg04395798	10	42971732	0.47443	10.9282	0.03785	6.09e-26	N
rs150406155	10	42795780	A	G	0.444	cg16633951	10	42971575	0.47477	10.9264	0.04775	6.2e-26	N
rs2505796	10	42851719	C	T	0.435	cg16633951	10	42971575	0.47488	10.9243	0.04832	6.32e-26	N
rs2505797	10	42851734	C	G	0.435	cg16633951	10	42971575	0.47488	10.9243	0.04832	6.32e-26	N
rs58557553	10	42491288	I	R	0.469	cg04395798	10	42971732	-0.47582	-10.9232	0.03415	6.39e-26	N
rs10900295	10	42691595	T	C	0.483	cg04395798	10	42971732	0.47103	10.9198	0.03386	6.6e-26	N
rs11265998	10	42479888	A	G	0.398	cg16633951	10	42971575	0.48082	10.9193	0.05298	6.63e-26	N
rs1603828	10	42451897	T	C	0.398	cg16633951	10	42971575	0.48082	10.9193	0.05298	6.63e-26	N
rs1255380	10	43003014	C	T	0.362	cg04395798	10	42971732	0.4725	10.9179	0.03806	6.72e-26	N
rs1255385	10	43024411	T	C	0.362	cg04395798	10	42971732	0.4725	10.9179	0.03806	6.72e-26	N
rs1255386	10	43024991	C	T	0.362	cg04395798	10	42971732	0.4725	10.9179	0.03806	6.72e-26	N
rs1255387	10	43025535	T	G	0.362	cg04395798	10	42971732	0.4725	10.9179	0.03806	6.72e-26	N
rs1255396	10	43039187	T	C	0.362	cg04395798	10	42971732	0.4725	10.9179	0.03806	6.72e-26	N
rs10564756	2	232042278	D	R	0.312	cg27665808	2	232055229	0.50734	10.9153	0.05738	6.89e-26	N
rs2303349	2	232030861	G	A	0.312	cg27665808	2	232055229	0.50734	10.9153	0.05738	6.89e-26	N
rs6437003	2	232030301	T	C	0.312	cg27665808	2	232055229	0.50734	10.9153	0.05738	6.89e-26	N
rs1255389	10	43026647	C	T	0.362	cg04395798	10	42971732	0.47205	10.9137	0.03795	7e-26	N
rs9691584	7	64958538	C	T	0.488	cg12143784	7	64541923	-0.48892	-10.9128	0.0233	7.06e-26	N
rs1025107	2	232034342	T	C	0.313	cg27665808	2	232055229	0.50732	10.91	0.05746	7.25e-26	N
rs2032953	2	232035793	T	C	0.313	cg27665808	2	232055229	0.50732	10.91	0.05746	7.25e-26	N
rs2303350	2	232030555	A	G	0.313	cg27665808	2	232055229	0.50732	10.91	0.05746	7.25e-26	N
rs2303351	2	232030510	A	C	0.313	cg27665808	2	232055229	0.50732	10.91	0.05746	7.25e-26	N
rs6749	2	232035429	A	G	0.313	cg27665808	2	232055229	0.50732	10.91	0.05746	7.25e-26	N
rs9770334	7	64959260	C	T	0.487	cg12143784	7	64541923	-0.48887	-10.9097	0.02355	7.27e-26	N
rs10900243	10	42639179	A	G	0.492	cg16633951	10	42971575	0.475	10.9075	0.0509	7.42e-26	N
rs1255406	10	42979254	T	C	0.373	cg16633951	10	42971575	0.47156	10.9071	0.04892	7.45e-26	N
rs112854464	19	10138699	D	R	0.366	cg01205324	19	10138615	-0.4613	-10.9062	0.00581	7.51e-26	N
rs10274919	7	64956181	C	T	0.477	cg12143784	7	64541923	-0.48521	-10.8996	0.0233	8e-26	N
rs11763981	7	64952374	T	C	0.477	cg12143784	7	64541923	-0.48521	-10.8996	0.0233	8e-26	N
rs1964364	7	64957464	A	C	0.477	cg12143784	7	64541923	-0.48521	-10.8996	0.0233	8e-26	N
rs35174746	7	64966064	I	R	0.477	cg12143784	7	64541923	-0.48521	-10.8996	0.0233	8e-26	N
rs4718248	7	64951818	G	A	0.477	cg12143784	7	64541923	-0.48521	-10.8996	0.0233	8e-26	N
rs9691010	7	64960031	T	C	0.477	cg12143784	7	64541923	-0.48521	-10.8996	0.0233	8e-26	N
rs2505811	10	42872833	C	G	0.414	cg04395798	10	42971732	-0.46873	-10.8939	0.03165	8.45e-26	N
rs10751398	10	42693948	C	T	0.482	cg04395798	10	42971732	0.46945	10.8932	0.03368	8.51e-26	N
rs62126286	19	50396546	T	A	0.237	cg10751382	19	50391554	0.52563	10.8928	0.14598	8.54e-26	N
rs2489687	10	42873205	T	C	0.404	cg16633951	10	42971575	-0.46946	-10.887	0.0426	9.03e-26	N
rs10160100	10	42521592	T	A	0.474	cg04395798	10	42971732	-0.479	-10.8856	0.03466	9.15e-26	N
rs2505832	10	42820806	T	C	0.415	cg04395798	10	42971732	-0.47213	-10.8849	0.03155	9.21e-26	N
rs2419416	7	64690488	C	T	0.499	cg12143784	7	64541923	-0.48217	-10.8842	0.02259	9.27e-26	N
rs2900856	7	64679561	T	C	0.499	cg12143784	7	64541923	-0.48217	-10.8842	0.02259	9.27e-26	N
rs4718202	7	64695965	C	T	0.499	cg12143784	7	64541923	-0.48217	-10.8842	0.02259	9.27e-26	N
rs4997766	7	64677097	T	C	0.499	cg12143784	7	64541923	-0.48217	-10.8842	0.02259	9.27e-26	N
rs56258847	7	64681065	G	C	0.499	cg12143784	7	64541923	-0.48217	-10.8842	0.02259	9.27e-26	N
rs6946169	7	64696002	G	C	0.499	cg12143784	7	64541923	-0.48217	-10.8842	0.02259	9.27e-26	N
rs146028422	7	64717893	A	G	0.5	cg12143784	7	64541923	-0.4834	-10.8817	0.02263	9.49e-26	N
rs201507775	10	42686357	D	R	0.436	cg04395798	10	42971732	0.4769	10.8812	0.03339	9.53e-26	N
rs200269554	10	42686343	D	R	0.434	cg04395798	10	42971732	0.47639	10.8805	0.03341	9.6e-26	N
rs11266028	10	42512008	G	A	0.466	cg04395798	10	42971732	0.46334	10.8789	0.03436	9.74e-26	N
rs11493021	10	42514611	T	C	0.466	cg04395798	10	42971732	0.46334	10.8789	0.03436	9.74e-26	N
rs11522555	10	42504697	C	G	0.466	cg04395798	10	42971732	0.46334	10.8789	0.03436	9.74e-26	N
rs9663319	10	42511839	A	G	0.466	cg04395798	10	42971732	0.46334	10.8789	0.03436	9.74e-26	N
rs11265985	10	42470330	T	C	0.397	cg16633951	10	42971575	0.4801	10.8757	0.05314	1e-25	N
rs111562640	14	104365783	A	G	0.031	cg22994272	14	104346241	1.29622	10.8738	0	1.02e-25	N
rs112086439	14	104384888	G	T	0.031	cg22994272	14	104346241	1.29622	10.8738	0	1.02e-25	N
rs112091599	14	104386793	T	C	0.031	cg22994272	14	104346241	1.29622	10.8738	0	1.02e-25	N
rs112499808	14	104384988	C	G	0.031	cg22994272	14	104346241	1.29622	10.8738	0	1.02e-25	N
rs112823068	14	104379926	T	C	0.031	cg22994272	14	104346241	1.29622	10.8738	0	1.02e-25	N
rs113241471	14	104384943	T	C	0.031	cg22994272	14	104346241	1.29622	10.8738	0	1.02e-25	N
rs113417243	14	104373888	C	A	0.031	cg22994272	14	104346241	1.29622	10.8738	0	1.02e-25	N
rs117504775	14	104386150	T	C	0.031	cg22994272	14	104346241	1.29622	10.8738	0	1.02e-25	N
rs17101928	14	104382339	T	C	0.031	cg22994272	14	104346241	1.29622	10.8738	0	1.02e-25	N
rs17101930	14	104382464	C	T	0.031	cg22994272	14	104346241	1.29622	10.8738	0	1.02e-25	N
rs28576742	14	104385714	C	T	0.031	cg22994272	14	104346241	1.29622	10.8738	0	1.02e-25	N
rs3783311	14	104382124	G	C	0.031	cg22994272	14	104346241	1.29622	10.8738	0	1.02e-25	N
rs7140812	14	104367449	G	A	0.031	cg22994272	14	104346241	1.29622	10.8738	0	1.02e-25	N
rs74086746	14	104377616	G	A	0.031	cg22994272	14	104346241	1.29622	10.8738	0	1.02e-25	N
rs74608132	14	104377031	T	G	0.031	cg22994272	14	104346241	1.29622	10.8738	0	1.02e-25	N
rs75113950	14	104384700	C	T	0.031	cg22994272	14	104346241	1.29622	10.8738	0	1.02e-25	N
rs75378596	14	104376318	G	C	0.031	cg22994272	14	104346241	1.29622	10.8738	0	1.02e-25	N
rs75939604	14	104383550	T	C	0.031	cg22994272	14	104346241	1.29622	10.8738	0	1.02e-25	N
rs76224845	14	104382265	C	T	0.031	cg22994272	14	104346241	1.29622	10.8738	0	1.02e-25	N
rs76690622	14	104382501	T	A	0.031	cg22994272	14	104346241	1.29622	10.8738	0	1.02e-25	N
rs77690608	14	104384002	C	T	0.031	cg22994272	14	104346241	1.29622	10.8738	0	1.02e-25	N
rs78475697	14	104374674	C	G	0.031	cg22994272	14	104346241	1.29622	10.8738	0	1.02e-25	N
rs78720680	14	104364938	T	C	0.031	cg22994272	14	104346241	1.29622	10.8738	0	1.02e-25	N
rs79148114	14	104380986	C	G	0.031	cg22994272	14	104346241	1.29622	10.8738	0	1.02e-25	N
rs79739978	14	104386091	C	T	0.031	cg22994272	14	104346241	1.29622	10.8738	0	1.02e-25	N
rs80098381	14	104369984	T	C	0.031	cg22994272	14	104346241	1.29622	10.8738	0	1.02e-25	N
rs80350843	14	104383416	T	C	0.031	cg22994272	14	104346241	1.29622	10.8738	0	1.02e-25	N
rs200766783	14	104221484	D	R	0.029	cg22994272	14	104346241	1.32074	10.8702	0	1.06e-25	N
rs78160995	14	104226935	C	T	0.029	cg22994272	14	104346241	1.32074	10.8702	0	1.06e-25	N
rs6437009	2	232110483	C	T	0.319	cg07929768	2	232055508	0.50741	10.8689	0.03257	1.07e-25	N
rs10899976	10	42794125	T	G	0.488	cg16633951	10	42971575	0.47117	10.8689	0.05048	1.07e-25	N
rs10900238	10	42635908	T	A	0.425	cg16633951	10	42971575	0.47567	10.8671	0.05242	1.09e-25	N
rs2505806	10	42866444	T	G	0.454	cg16633951	10	42971575	0.4706	10.8668	0.0467	1.09e-25	N
rs2505807	10	42868071	C	T	0.418	cg04395798	10	42971732	-0.46966	-10.8633	0.03131	1.13e-25	N
rs2201904	10	42427832	T	C	0.408	cg16633951	10	42971575	-0.46688	-10.8634	0.04363	1.13e-25	N
rs11761736	7	64777890	G	C	0.498	cg12143784	7	64541923	0.48367	10.8537	0.02278	1.24e-25	N
rs11764005	7	64788377	A	G	0.498	cg12143784	7	64541923	0.48367	10.8537	0.02278	1.24e-25	N
rs11765265	7	64799139	C	T	0.498	cg12143784	7	64541923	0.48367	10.8537	0.02278	1.24e-25	N
rs28863832	7	64797183	G	C	0.498	cg12143784	7	64541923	0.48367	10.8537	0.02278	1.24e-25	N
rs6460237	7	64802973	G	T	0.498	cg12143784	7	64541923	0.48367	10.8537	0.02278	1.24e-25	N
rs7784914	7	64777556	C	T	0.498	cg12143784	7	64541923	0.48367	10.8537	0.02278	1.24e-25	N
rs7905348	10	42607955	T	G	0.45	cg04395798	10	42971732	-0.47379	-10.8528	0.03397	1.25e-25	N
rs7908581	10	42607956	T	C	0.45	cg04395798	10	42971732	-0.47379	-10.8528	0.03397	1.25e-25	N
rs1119187	10	42459709	G	A	0.495	cg04395798	10	42971732	-0.47369	-10.8505	0.03314	1.28e-25	N
rs10797151	10	42428693	A	C	0.41	cg16633951	10	42971575	-0.46654	-10.8469	0.04439	1.32e-25	N
rs6606618	10	42687749	C	G	0.432	cg04395798	10	42971732	0.47564	10.8421	0.03271	1.38e-25	N
rs9663696	10	42441942	G	C	0.468	cg04395798	10	42971732	-0.47201	-10.837	0.0337	1.45e-25	N
rs10908979	10	42503038	G	C	0.493	cg04395798	10	42971732	-0.47254	-10.8359	0.03345	1.47e-25	N
rs11265993	10	42476722	C	A	0.493	cg04395798	10	42971732	-0.47254	-10.8359	0.03345	1.47e-25	N
rs9665296	10	42501032	G	A	0.493	cg04395798	10	42971732	-0.47254	-10.8359	0.03345	1.47e-25	N
rs10427136	19	10137806	C	A	0.365	cg01205324	19	10138615	-0.45842	-10.8352	0.00577	1.48e-25	N
rs28493163	19	10138490	T	C	0.365	cg01205324	19	10138615	-0.45842	-10.8352	0.00577	1.48e-25	N
rs9702482	10	42460509	G	T	0.421	cg04395798	10	42971732	-0.45974	-10.8351	0.03218	1.48e-25	N
rs9702870	10	42460511	C	A	0.421	cg04395798	10	42971732	-0.45974	-10.8351	0.03218	1.48e-25	N
[truncated: 4,657 more rows]

## Sheet: S5. mQTLs, cord blood+children
Supplemental Table S5. Results from overlap with mQTLs appearing both in cord blood and in peripheral blood in children and with significantly different methylation sites in Lifestyle intervention vs. Control group (TOP-study), combined with public GWAS data
mQTLs in cord blood														mQTL in children					GWAS data
SNP	SNP Chr	SNP Pos	A1	A2	MAF	CpG site	CpG Chr	CpG Pos	beta cordblood	t stat cordblood	Effect Size cordblood	p-value cordblood	Trans cordblood	Timepoint Children	beta Children	t stat Children	Effect Size Children	p-value Children	Disease trait	Reported Gene	Mapped Gene	Strongest SNP risk allele	Risk allele frequency	p-value	p-value_mlog	p-value text	OR or beta	95% CI	PUBMEDID
rs9677476	2	232126290	G	A	0.282	cg07929768	2	232055508	0.6824	15.2329	0.03426	5.49e-46	N	Childhood	0.78741	20.1963	0.10468	4.04e-74	Food antigen IgG levels	ARMC9	ARMC9	rs9677476-G	0.274	1e-06	6	(BSA-a)	0.21	[NR] unit increase	24962563
rs9677476	2	232126290	G	A	0.282	cg27665808	2	232055229	0.61841	13.3526	0.07761	1e-36	N	Childhood	0.71988	16.4342	0.05801	9.03e-53	Food antigen IgG levels	ARMC9	ARMC9	rs9677476-G	0.274	1e-06	6	(BSA-a)	0.21	[NR] unit increase	24962563
rs4475146	4	9946656	A	C	0.214	cg03725404	4	9998017	0.241	5.46279	0.02215	6.33e-08	N	Adolescence	0.25172	6.5428	0.03684	1.05e-10	Gout	SLC2A9	SLC2A9	rs4475146-A	0.2237	4e-26	25.3979		0.4682	[0.38-0.55] unit decrease	23263486
rs734553	4	9923004	G	T	0.23	cg03725404	4	9998017	0.23208	5.40479	0.02542	8.66e-08	N	Adolescence	0.21547	5.73255	0.0324	1.38e-08	Gout	SLC2A9	SLC2A9	rs734553-T	0.79	2e-07	6.69897		1.39	[1.23-1.59]	21983786
rs7580717	2	232176541	A	G	0.324	cg07929768	2	232055508	0.46986	10.2059	0.02618	5.06e-23	N	Childhood	0.52154	12.5251	0.05013	4.27e-33	Multiple myeloma	NR	ARMC9	rs7580717-G		5e-06	5.30103		1.131	[NR]	23955597
rs7580717	2	232176541	A	G	0.324	cg27665808	2	232055229	0.43527	9.30568	0.04737	1.36e-19	N	Childhood	0.48592	10.789	0.03677	1.72e-25	Multiple myeloma	NR	ARMC9	rs7580717-G		5e-06	5.30103		1.131	[NR]	23955597
rs9991278	4	10002665	T	C	0.2	cg03725404	4	9998017	0.25585	5.63099	0.03217	2.51e-08	N	Adolescence	0.30459	7.77636	0.03712	2.2e-14	Serum metabolite levels	SLC2A9	SLC2A9	rs9991278-?	NR	5e-21	20.301	(urate)	0.02992	[NR] unit decrease	23093944
rs7675964	4	9941434	T	C	0.27	cg03725404	4	9998017	0.25141	6.24102	0.03652	7.18e-10	N	Adolescence	0.27017	7.81334	0.03321	1.67e-14	Serum uric acid levels	SLC2A9	SLC2A9	rs7675964-?	NR	5e-17	16.301	(Conditioned on rs7678287)			30305239
rs7678287	4	10000501	A	G	0.2	cg03725404	4	9998017	0.25585	5.63099	0.03217	2.51e-08	N	Adolescence	0.30459	7.77636	0.03712	2.2e-14	Serum uric acid levels	SLC2A9	SLC2A9	rs7678287-A	NR	2e-42	41.699		0.47	[NR] unit decrease	30305239
rs734553	4	9923004	G	T	0.23	cg03725404	4	9998017	0.23208	5.40479	0.02542	8.66e-08	N	Adolescence	0.21547	5.73255	0.0324	1.38e-08	Serum uric acid levels	SLC2A9	SLC2A9	rs734553-T	0.79	1e-80	80		0.24	[0.22-0.27] s.d. increase	21983786
rs734553	4	9923004	G	T	0.23	cg03725404	4	9998017	0.23208	5.40479	0.02542	8.66e-08	N	Adolescence	0.21547	5.73255	0.0324	1.38e-08	Uric acid levels	SLC2A9	SLC2A9	rs734553-T	0.77	1e-192	192	(women)	0.4	[0.371-0.423] mg/dl increase	19503597
rs734553	4	9923004	G	T	0.23	cg03725404	4	9998017	0.23208	5.40479	0.02542	8.66e-08	N	Adolescence	0.21547	5.73255	0.0324	1.38e-08	Uric acid levels	SLC2A9	SLC2A9	rs734553-T	0.77	1e-41	41	(men)	0.22	[0.188-0.252] mg/dl increase	19503597
rs7564129	2	231930682	G	C	0.315	cg07929768	2	232055508	0.55103	12.2147	0.02968	1.74e-31	N	Adolescence	0.69485	17.914	0.07358	5.64e-61	White matter microstructure (mean diusivities)	NR	PSMD1	rs7564129-?		4e-08	7.39794	(Hippocampus )			31666681
rs7564129	2	231930682	G	C	0.315	cg27665808	2	232055229	0.49928	10.809	0.05578	1.89e-25	N	Adolescence	0.59181	13.0936	0.05801	9.17e-36	White matter microstructure (mean diusivities)	NR	PSMD1	rs7564129-?		4e-08	7.39794	(Hippocampus )			31666681
rs2290774	19	50375035	C	T	0.438	cg10751382	19	50391554	0.77462	21.7248	0.17244	5.7e-82	N	Childhood	0.81281	23.4492	0.11553	9.52e-94
rs3810268	19	50379193	T	C	0.422	cg10751382	19	50391554	0.75441	21.1341	0.17302	1.6e-78	N	Childhood	0.8228	24.441	0.11477	7.28e-100
rs8110265	19	50377835	A	G	0.422	cg10751382	19	50391554	0.75441	21.1341	0.17302	1.6e-78	N	Childhood	0.8228	24.441	0.11477	7.28e-100
rs11083985	19	50378143	C	T	0.421	cg10751382	19	50391554	0.75581	21.1063	0.17302	2.33e-78	N	Childhood	0.82382	24.3922	0.11496	1.46e-99
rs2290775	19	50375242	T	C	0.421	cg10751382	19	50391554	0.75581	21.1063	0.17302	2.33e-78	N	Childhood	0.82382	24.3922	0.11496	1.46e-99
rs731826	19	50380858	G	T	0.421	cg10751382	19	50391554	0.75581	21.1063	0.17302	2.33e-78	N	Childhood	0.82382	24.3922	0.11496	1.46e-99
rs3810268	19	50379193	T	C	0.422	cg14071503	19	50391752	0.70317	18.3512	0.06695	1.16e-62	N	Childhood	0.62306	18.0097	0.04007	1.75e-61
rs8110265	19	50377835	A	G	0.422	cg14071503	19	50391752	0.70317	18.3512	0.06695	1.16e-62	N	Childhood	0.62306	18.0097	0.04007	1.75e-61
rs11083985	19	50378143	C	T	0.421	cg14071503	19	50391752	0.70505	18.3505	0.0664	1.17e-62	N	Childhood	0.6194	17.804	0.04011	2.52e-60
rs2290775	19	50375242	T	C	0.421	cg14071503	19	50391752	0.70505	18.3505	0.0664	1.17e-62	N	Childhood	0.6194	17.804	0.04011	2.52e-60
rs731826	19	50380858	G	T	0.421	cg14071503	19	50391752	0.70505	18.3505	0.0664	1.17e-62	N	Childhood	0.6194	17.804	0.04011	2.52e-60
rs2290774	19	50375035	C	T	0.438	cg14071503	19	50391752	0.70092	18.0292	0.06847	7.08e-61	N	Childhood	0.61681	17.4625	0.03936	2.04e-58
rs62197345	2	232126698	A	C	0.256	cg07929768	2	232055508	0.70799	15.8551	0.03795	3.39e-49	N	Childhood	0.75473	19.0013	0.10284	3.82e-67
rs9973370	2	232095587	G	A	0.28	cg07929768	2	232055508	0.68652	15.3634	0.03439	1.18e-46	N	Childhood	0.78819	20.2411	0.1047	2.2e-74
rs10544278	2	232139717	D	R	0.221	cg07929768	2	232055508	0.72599	15.3568	0.04977	1.28e-46	N	Adolescence	0.81289	20.062	0.08699	2.25e-73
rs10544278	2	232139717	D	R	0.221	cg07929768	2	232055508	0.72599	15.3568	0.04977	1.28e-46	N	Childhood	0.79456	18.9595	0.10722	6.64e-67
rs7584535	2	232106857	T	C	0.28	cg07929768	2	232055508	0.68542	15.328	0.03437	1.79e-46	N	Adolescence	0.79522	20.9427	0.08406	1.33e-78
rs7584535	2	232106857	T	C	0.28	cg07929768	2	232055508	0.68542	15.328	0.03437	1.79e-46	N	Childhood	0.78938	20.2819	0.10477	1.26e-74
rs12470450	2	232113888	A	T	0.281	cg07929768	2	232055508	0.68461	15.301	0.03431	2.46e-46	N	Childhood	0.78968	20.2882	0.1047	1.16e-74
rs1881484	2	232112450	G	C	0.281	cg07929768	2	232055508	0.68461	15.301	0.03431	2.46e-46	N	Childhood	0.78968	20.2882	0.1047	1.16e-74
rs6437010	2	232113263	C	G	0.281	cg07929768	2	232055508	0.68461	15.301	0.03431	2.46e-46	N	Childhood	0.78968	20.2882	0.1047	1.16e-74
rs6704770	2	232109816	G	T	0.281	cg07929768	2	232055508	0.68461	15.301	0.03431	2.46e-46	N	Childhood	0.78968	20.2882	0.1047	1.16e-74
rs59823376	2	232138371	A	G	0.222	cg07929768	2	232055508	0.7205	15.2848	0.04748	2.98e-46	N	Adolescence	0.8127	20.1633	0.08893	5.69e-74
rs59823376	2	232138371	A	G	0.222	cg07929768	2	232055508	0.7205	15.2848	0.04748	2.98e-46	N	Childhood	0.79401	19.0427	0.11027	2.2e-67
rs72985811	2	232137146	C	A	0.222	cg07929768	2	232055508	0.7205	15.2848	0.04748	2.98e-46	N	Adolescence	0.8127	20.1633	0.08893	5.69e-74
rs72985811	2	232137146	C	A	0.222	cg07929768	2	232055508	0.7205	15.2848	0.04748	2.98e-46	N	Childhood	0.79401	19.0427	0.11027	2.2e-67
rs12621567	2	232118813	C	T	0.282	cg07929768	2	232055508	0.6824	15.2329	0.03426	5.49e-46	N	Childhood	0.78741	20.1963	0.10468	4.04e-74
rs13415839	2	232126534	T	C	0.282	cg07929768	2	232055508	0.6824	15.2329	0.03426	5.49e-46	N	Childhood	0.78741	20.1963	0.10468	4.04e-74
rs13428369	2	232125632	C	T	0.282	cg07929768	2	232055508	0.6824	15.2329	0.03426	5.49e-46	N	Childhood	0.78741	20.1963	0.10468	4.04e-74
rs200139389	2	232127714	D	R	0.282	cg07929768	2	232055508	0.6824	15.2329	0.03426	5.49e-46	N	Childhood	0.78741	20.1963	0.10468	4.04e-74
rs36036355	2	232127712	D	R	0.282	cg07929768	2	232055508	0.6824	15.2329	0.03426	5.49e-46	N	Childhood	0.78741	20.1963	0.10468	4.04e-74
rs6711312	2	232122348	C	T	0.282	cg07929768	2	232055508	0.6824	15.2329	0.03426	5.49e-46	N	Childhood	0.78741	20.1963	0.10468	4.04e-74
rs6724253	2	232121998	G	A	0.282	cg07929768	2	232055508	0.6824	15.2329	0.03426	5.49e-46	N	Childhood	0.78741	20.1963	0.10468	4.04e-74
rs7598478	2	232115887	T	C	0.282	cg07929768	2	232055508	0.6824	15.2329	0.03426	5.49e-46	N	Childhood	0.78741	20.1963	0.10468	4.04e-74
rs12463656	2	232036396	A	G	0.161	cg07929768	2	232055508	0.79229	14.5078	0.06465	2.47e-42	N	Adolescence	0.9	19.0874	0.09743	1.11e-67
rs12468767	2	232036843	G	T	0.161	cg07929768	2	232055508	0.79229	14.5078	0.06465	2.47e-42	N	Adolescence	0.9	19.0874	0.09743	1.11e-67
rs13394402	2	231968920	T	G	0.161	cg07929768	2	232055508	0.79229	14.5078	0.06465	2.47e-42	N	Adolescence	0.9	19.0874	0.09743	1.11e-67
rs13402242	2	232029568	G	A	0.161	cg07929768	2	232055508	0.79229	14.5078	0.06465	2.47e-42	N	Adolescence	0.9	19.0874	0.09743	1.11e-67
rs62193731	2	232006786	A	G	0.161	cg07929768	2	232055508	0.79229	14.5078	0.06465	2.47e-42	N	Adolescence	0.9	19.0874	0.09743	1.11e-67
rs72983619	2	232004469	A	G	0.161	cg07929768	2	232055508	0.79229	14.5078	0.06465	2.47e-42	N	Adolescence	0.9	19.0874	0.09743	1.11e-67
rs11764327	7	64757311	T	C	0.404	cg12143784	7	64541923	0.62151	14.4928	0.028	2.93e-42	N	Adolescence	0.70495	18.2717	0.02193	5.32e-63
rs12535182	7	64785827	G	A	0.406	cg12143784	7	64541923	0.61907	14.4087	0.02923	7.65e-42	N	Adolescence	0.71131	18.5097	0.02201	2.34e-64
rs12535182	7	64785827	G	A	0.406	cg12143784	7	64541923	0.61907	14.4087	0.02923	7.65e-42	N	Childhood	0.60648	15.5602	0.02263	4.14e-48
rs12536316	7	64786318	C	T	0.406	cg12143784	7	64541923	0.61907	14.4087	0.02923	7.65e-42	N	Adolescence	0.71131	18.5097	0.02201	2.34e-64
rs12536316	7	64786318	C	T	0.406	cg12143784	7	64541923	0.61907	14.4087	0.02923	7.65e-42	N	Childhood	0.60648	15.5602	0.02263	4.14e-48
rs12666743	7	64777342	A	G	0.406	cg12143784	7	64541923	0.61907	14.4087	0.02923	7.65e-42	N	Adolescence	0.71131	18.5097	0.02201	2.34e-64
rs12666743	7	64777342	A	G	0.406	cg12143784	7	64541923	0.61907	14.4087	0.02923	7.65e-42	N	Childhood	0.60648	15.5602	0.02263	4.14e-48
rs12669746	7	64787725	A	G	0.406	cg12143784	7	64541923	0.61907	14.4087	0.02923	7.65e-42	N	Adolescence	0.71131	18.5097	0.02201	2.34e-64
rs12669746	7	64787725	A	G	0.406	cg12143784	7	64541923	0.61907	14.4087	0.02923	7.65e-42	N	Childhood	0.60648	15.5602	0.02263	4.14e-48
rs199588397	7	64781597	D	R	0.406	cg12143784	7	64541923	0.61907	14.4087	0.02923	7.65e-42	N	Adolescence	0.71131	18.5097	0.02201	2.34e-64
rs199588397	7	64781597	D	R	0.406	cg12143784	7	64541923	0.61907	14.4087	0.02923	7.65e-42	N	Childhood	0.60648	15.5602	0.02263	4.14e-48
rs34661443	7	64783439	D	R	0.406	cg12143784	7	64541923	0.61907	14.4087	0.02923	7.65e-42	N	Adolescence	0.71131	18.5097	0.02201	2.34e-64
rs34661443	7	64783439	D	R	0.406	cg12143784	7	64541923	0.61907	14.4087	0.02923	7.65e-42	N	Childhood	0.60648	15.5602	0.02263	4.14e-48
rs35417167	7	64783432	T	C	0.406	cg12143784	7	64541923	0.61907	14.4087	0.02923	7.65e-42	N	Adolescence	0.71131	18.5097	0.02201	2.34e-64
rs35417167	7	64783432	T	C	0.406	cg12143784	7	64541923	0.61907	14.4087	0.02923	7.65e-42	N	Childhood	0.60648	15.5602	0.02263	4.14e-48
rs3857677	7	64779759	G	A	0.406	cg12143784	7	64541923	0.61907	14.4087	0.02923	7.65e-42	N	Adolescence	0.71131	18.5097	0.02201	2.34e-64
rs3857677	7	64779759	G	A	0.406	cg12143784	7	64541923	0.61907	14.4087	0.02923	7.65e-42	N	Childhood	0.60648	15.5602	0.02263	4.14e-48
rs4717247	7	64783235	A	T	0.406	cg12143784	7	64541923	0.61907	14.4087	0.02923	7.65e-42	N	Adolescence	0.71131	18.5097	0.02201	2.34e-64
rs4717247	7	64783235	A	T	0.406	cg12143784	7	64541923	0.61907	14.4087	0.02923	7.65e-42	N	Childhood	0.60648	15.5602	0.02263	4.14e-48
rs6954158	7	64790669	A	G	0.406	cg12143784	7	64541923	0.61907	14.4087	0.02923	7.65e-42	N	Adolescence	0.71131	18.5097	0.02201	2.34e-64
rs6954158	7	64790669	A	G	0.406	cg12143784	7	64541923	0.61907	14.4087	0.02923	7.65e-42	N	Childhood	0.60648	15.5602	0.02263	4.14e-48
rs6954951	7	64781711	C	A	0.406	cg12143784	7	64541923	0.61907	14.4087	0.02923	7.65e-42	N	Adolescence	0.71131	18.5097	0.02201	2.34e-64
rs6954951	7	64781711	C	A	0.406	cg12143784	7	64541923	0.61907	14.4087	0.02923	7.65e-42	N	Childhood	0.60648	15.5602	0.02263	4.14e-48
rs6973096	7	64781660	A	C	0.406	cg12143784	7	64541923	0.61907	14.4087	0.02923	7.65e-42	N	Adolescence	0.71131	18.5097	0.02201	2.34e-64
rs6973096	7	64781660	A	C	0.406	cg12143784	7	64541923	0.61907	14.4087	0.02923	7.65e-42	N	Childhood	0.60648	15.5602	0.02263	4.14e-48
rs6978350	7	64790406	C	T	0.406	cg12143784	7	64541923	0.61907	14.4087	0.02923	7.65e-42	N	Adolescence	0.71131	18.5097	0.02201	2.34e-64
rs6978350	7	64790406	C	T	0.406	cg12143784	7	64541923	0.61907	14.4087	0.02923	7.65e-42	N	Childhood	0.60648	15.5602	0.02263	4.14e-48
rs10949982	7	64730642	A	G	0.404	cg12143784	7	64541923	0.61772	14.3647	0.0279	1.26e-41	N	Adolescence	0.70495	18.2717	0.02193	5.32e-63
rs10949982	7	64730642	A	G	0.404	cg12143784	7	64541923	0.61772	14.3647	0.0279	1.26e-41	N	Childhood	0.59877	15.3011	0.02242	9.38e-47
rs10949983	7	64739240	C	T	0.404	cg12143784	7	64541923	0.61772	14.3647	0.0279	1.26e-41	N	Adolescence	0.70495	18.2717	0.02193	5.32e-63
rs10949983	7	64739240	C	T	0.404	cg12143784	7	64541923	0.61772	14.3647	0.0279	1.26e-41	N	Childhood	0.59877	15.3011	0.02242	9.38e-47
rs11292630	7	64755122	D	R	0.404	cg12143784	7	64541923	0.61772	14.3647	0.0279	1.26e-41	N	Adolescence	0.70495	18.2717	0.02193	5.32e-63
rs11292630	7	64755122	D	R	0.404	cg12143784	7	64541923	0.61772	14.3647	0.0279	1.26e-41	N	Childhood	0.59877	15.3011	0.02242	9.38e-47
rs11761184	7	64761479	A	G	0.404	cg12143784	7	64541923	0.61772	14.3647	0.0279	1.26e-41	N	Adolescence	0.70495	18.2717	0.02193	5.32e-63
rs11761184	7	64761479	A	G	0.404	cg12143784	7	64541923	0.61772	14.3647	0.0279	1.26e-41	N	Childhood	0.59877	15.3011	0.02242	9.38e-47
rs11761772	7	64764772	C	T	0.404	cg12143784	7	64541923	0.61772	14.3647	0.0279	1.26e-41	N	Adolescence	0.70495	18.2717	0.02193	5.32e-63
rs11761772	7	64764772	C	T	0.404	cg12143784	7	64541923	0.61772	14.3647	0.0279	1.26e-41	N	Childhood	0.59877	15.3011	0.02242	9.38e-47
rs11768131	7	64761455	T	C	0.404	cg12143784	7	64541923	0.61772	14.3647	0.0279	1.26e-41	N	Adolescence	0.70495	18.2717	0.02193	5.32e-63
rs11768131	7	64761455	T	C	0.404	cg12143784	7	64541923	0.61772	14.3647	0.0279	1.26e-41	N	Childhood	0.59877	15.3011	0.02242	9.38e-47
rs11772543	7	64761611	C	T	0.404	cg12143784	7	64541923	0.61772	14.3647	0.0279	1.26e-41	N	Adolescence	0.70495	18.2717	0.02193	5.32e-63
rs11772543	7	64761611	C	T	0.404	cg12143784	7	64541923	0.61772	14.3647	0.0279	1.26e-41	N	Childhood	0.59877	15.3011	0.02242	9.38e-47
rs11773286	7	64737116	T	C	0.404	cg12143784	7	64541923	0.61772	14.3647	0.0279	1.26e-41	N	Adolescence	0.70495	18.2717	0.02193	5.32e-63
rs11773286	7	64737116	T	C	0.404	cg12143784	7	64541923	0.61772	14.3647	0.0279	1.26e-41	N	Childhood	0.59877	15.3011	0.02242	9.38e-47
rs12534769	7	64741666	A	G	0.404	cg12143784	7	64541923	0.61772	14.3647	0.0279	1.26e-41	N	Adolescence	0.70495	18.2717	0.02193	5.32e-63
rs12534769	7	64741666	A	G	0.404	cg12143784	7	64541923	0.61772	14.3647	0.0279	1.26e-41	N	Childhood	0.59877	15.3011	0.02242	9.38e-47
rs13241147	7	64753269	C	G	0.404	cg12143784	7	64541923	0.61772	14.3647	0.0279	1.26e-41	N	Adolescence	0.70495	18.2717	0.02193	5.32e-63
rs13241147	7	64753269	C	G	0.404	cg12143784	7	64541923	0.61772	14.3647	0.0279	1.26e-41	N	Childhood	0.59877	15.3011	0.02242	9.38e-47
rs200175053	7	64747726	D	R	0.404	cg12143784	7	64541923	0.61772	14.3647	0.0279	1.26e-41	N	Adolescence	0.70495	18.2717	0.02193	5.32e-63
rs200175053	7	64747726	D	R	0.404	cg12143784	7	64541923	0.61772	14.3647	0.0279	1.26e-41	N	Childhood	0.59877	15.3011	0.02242	9.38e-47
rs34041561	7	64733781	I	R	0.404	cg12143784	7	64541923	0.61772	14.3647	0.0279	1.26e-41	N	Adolescence	0.70495	18.2717	0.02193	5.32e-63
rs34041561	7	64733781	I	R	0.404	cg12143784	7	64541923	0.61772	14.3647	0.0279	1.26e-41	N	Childhood	0.59877	15.3011	0.02242	9.38e-47
rs34253157	7	64747729	D	R	0.404	cg12143784	7	64541923	0.61772	14.3647	0.0279	1.26e-41	N	Adolescence	0.70495	18.2717	0.02193	5.32e-63
rs34253157	7	64747729	D	R	0.404	cg12143784	7	64541923	0.61772	14.3647	0.0279	1.26e-41	N	Childhood	0.59877	15.3011	0.02242	9.38e-47
rs4718208	7	64730706	A	G	0.404	cg12143784	7	64541923	0.61772	14.3647	0.0279	1.26e-41	N	Adolescence	0.70495	18.2717	0.02193	5.32e-63
rs4718208	7	64730706	A	G	0.404	cg12143784	7	64541923	0.61772	14.3647	0.0279	1.26e-41	N	Childhood	0.59877	15.3011	0.02242	9.38e-47
rs4718210	7	64735666	T	G	0.404	cg12143784	7	64541923	0.61772	14.3647	0.0279	1.26e-41	N	Adolescence	0.70495	18.2717	0.02193	5.32e-63
rs4718210	7	64735666	T	G	0.404	cg12143784	7	64541923	0.61772	14.3647	0.0279	1.26e-41	N	Childhood	0.59877	15.3011	0.02242	9.38e-47
rs4718211	7	64735671	T	A	0.404	cg12143784	7	64541923	0.61772	14.3647	0.0279	1.26e-41	N	Adolescence	0.70495	18.2717	0.02193	5.32e-63
rs4718211	7	64735671	T	A	0.404	cg12143784	7	64541923	0.61772	14.3647	0.0279	1.26e-41	N	Childhood	0.59877	15.3011	0.02242	9.38e-47
rs55891307	7	64743364	T	C	0.404	cg12143784	7	64541923	0.61772	14.3647	0.0279	1.26e-41	N	Adolescence	0.70495	18.2717	0.02193	5.32e-63
rs55891307	7	64743364	T	C	0.404	cg12143784	7	64541923	0.61772	14.3647	0.0279	1.26e-41	N	Childhood	0.59877	15.3011	0.02242	9.38e-47
rs564679	7	64751848	T	G	0.404	cg12143784	7	64541923	0.61772	14.3647	0.0279	1.26e-41	N	Adolescence	0.70495	18.2717	0.02193	5.32e-63
rs564679	7	64751848	T	G	0.404	cg12143784	7	64541923	0.61772	14.3647	0.0279	1.26e-41	N	Childhood	0.59877	15.3011	0.02242	9.38e-47
rs58643803	7	64737086	T	C	0.404	cg12143784	7	64541923	0.61772	14.3647	0.0279	1.26e-41	N	Adolescence	0.70495	18.2717	0.02193	5.32e-63
rs58643803	7	64737086	T	C	0.404	cg12143784	7	64541923	0.61772	14.3647	0.0279	1.26e-41	N	Childhood	0.59877	15.3011	0.02242	9.38e-47
rs6460232	7	64745413	A	G	0.404	cg12143784	7	64541923	0.61772	14.3647	0.0279	1.26e-41	N	Adolescence	0.70495	18.2717	0.02193	5.32e-63
rs6460232	7	64745413	A	G	0.404	cg12143784	7	64541923	0.61772	14.3647	0.0279	1.26e-41	N	Childhood	0.59877	15.3011	0.02242	9.38e-47
rs6944245	7	64746213	G	A	0.404	cg12143784	7	64541923	0.61772	14.3647	0.0279	1.26e-41	N	Adolescence	0.70495	18.2717	0.02193	5.32e-63
rs6944245	7	64746213	G	A	0.404	cg12143784	7	64541923	0.61772	14.3647	0.0279	1.26e-41	N	Childhood	0.59877	15.3011	0.02242	9.38e-47
rs6948955	7	64752838	G	A	0.404	cg12143784	7	64541923	0.61772	14.3647	0.0279	1.26e-41	N	Adolescence	0.70495	18.2717	0.02193	5.32e-63
rs6948955	7	64752838	G	A	0.404	cg12143784	7	64541923	0.61772	14.3647	0.0279	1.26e-41	N	Childhood	0.59877	15.3011	0.02242	9.38e-47
rs6958237	7	64745719	A	C	0.404	cg12143784	7	64541923	0.61772	14.3647	0.0279	1.26e-41	N	Adolescence	0.70495	18.2717	0.02193	5.32e-63
rs6958237	7	64745719	A	C	0.404	cg12143784	7	64541923	0.61772	14.3647	0.0279	1.26e-41	N	Childhood	0.59877	15.3011	0.02242	9.38e-47
rs6963248	7	64746527	T	C	0.404	cg12143784	7	64541923	0.61772	14.3647	0.0279	1.26e-41	N	Adolescence	0.70495	18.2717	0.02193	5.32e-63
rs6963248	7	64746527	T	C	0.404	cg12143784	7	64541923	0.61772	14.3647	0.0279	1.26e-41	N	Childhood	0.59877	15.3011	0.02242	9.38e-47
rs6964167	7	64747078	G	C	0.404	cg12143784	7	64541923	0.61772	14.3647	0.0279	1.26e-41	N	Adolescence	0.70495	18.2717	0.02193	5.32e-63
rs6964167	7	64747078	G	C	0.404	cg12143784	7	64541923	0.61772	14.3647	0.0279	1.26e-41	N	Childhood	0.59877	15.3011	0.02242	9.38e-47
rs7796833	7	64734478	C	G	0.404	cg12143784	7	64541923	0.61772	14.3647	0.0279	1.26e-41	N	Adolescence	0.70495	18.2717	0.02193	5.32e-63
rs7796833	7	64734478	C	G	0.404	cg12143784	7	64541923	0.61772	14.3647	0.0279	1.26e-41	N	Childhood	0.59877	15.3011	0.02242	9.38e-47
rs12471957	2	231993738	T	G	0.16	cg07929768	2	232055508	0.78645	14.3383	0.06463	1.71e-41	N	Adolescence	0.89807	18.9829	0.09729	4.47e-67
rs17440378	2	231979355	T	C	0.16	cg07929768	2	232055508	0.78645	14.3383	0.06463	1.71e-41	N	Adolescence	0.89807	18.9829	0.09729	4.47e-67
rs12469096	2	231921586	C	G	0.162	cg07929768	2	232055508	0.77588	14.3339	0.05675	1.79e-41	N	Adolescence	0.87939	18.7464	0.0894	1.03e-65
rs143589973	7	64969612	D	R	0.396	cg12143784	7	64541923	0.62405	14.2963	0.02954	2.75e-41	N	Childhood	0.64649	16.6818	0.02301	4.09e-54
rs75957074	7	64748243	G	A	0.388	cg12143784	7	64541923	0.61953	14.2444	0.02576	4.95e-41	N	Adolescence	0.69437	17.7074	0.021	8.18e-60
rs75957074	7	64748243	G	A	0.388	cg12143784	7	64541923	0.61953	14.2444	0.02576	4.95e-41	N	Childhood	0.58967	14.8201	0.02238	2.85e-44
rs10949984	7	64766993	A	G	0.405	cg12143784	7	64541923	0.61348	14.2245	0.028	6.2e-41	N	Adolescence	0.70649	18.3074	0.02197	3.33e-63
rs11772443	7	64761275	C	T	0.405	cg12143784	7	64541923	0.61348	14.2245	0.028	6.2e-41	N	Adolescence	0.70649	18.3074	0.02197	3.33e-63
rs11977584	7	64750626	T	C	0.405	cg12143784	7	64541923	0.61348	14.2245	0.028	6.2e-41	N	Adolescence	0.70649	18.3074	0.02197	3.33e-63
rs2672007	7	64754971	C	T	0.405	cg12143784	7	64541923	0.61348	14.2245	0.028	6.2e-41	N	Adolescence	0.70649	18.3074	0.02197	3.33e-63
rs35888355	7	64762875	C	G	0.405	cg12143784	7	64541923	0.61348	14.2245	0.028	6.2e-41	N	Adolescence	0.70649	18.3074	0.02197	3.33e-63
rs474341	7	64737545	A	G	0.405	cg12143784	7	64541923	0.61348	14.2245	0.028	6.2e-41	N	Adolescence	0.70649	18.3074	0.02197	3.33e-63
rs517258	7	64743183	G	T	0.405	cg12143784	7	64541923	0.61348	14.2245	0.028	6.2e-41	N	Adolescence	0.70649	18.3074	0.02197	3.33e-63
rs532409	7	64763167	G	A	0.405	cg12143784	7	64541923	0.61348	14.2245	0.028	6.2e-41	N	Adolescence	0.70649	18.3074	0.02197	3.33e-63
rs537150	7	64752578	A	T	0.405	cg12143784	7	64541923	0.61348	14.2245	0.028	6.2e-41	N	Adolescence	0.70649	18.3074	0.02197	3.33e-63
rs590455	7	64763033	T	A	0.405	cg12143784	7	64541923	0.61348	14.2245	0.028	6.2e-41	N	Adolescence	0.70649	18.3074	0.02197	3.33e-63
rs608809	7	64756869	C	T	0.405	cg12143784	7	64541923	0.61348	14.2245	0.028	6.2e-41	N	Adolescence	0.70649	18.3074	0.02197	3.33e-63
rs635028	7	64741772	T	C	0.405	cg12143784	7	64541923	0.61348	14.2245	0.028	6.2e-41	N	Adolescence	0.70649	18.3074	0.02197	3.33e-63
rs658606	7	64753427	A	G	0.405	cg12143784	7	64541923	0.61348	14.2245	0.028	6.2e-41	N	Adolescence	0.70649	18.3074	0.02197	3.33e-63
rs66532283	7	64733749	D	R	0.405	cg12143784	7	64541923	0.61348	14.2245	0.028	6.2e-41	N	Adolescence	0.70649	18.3074	0.02197	3.33e-63
rs666389	7	64760534	C	T	0.405	cg12143784	7	64541923	0.61348	14.2245	0.028	6.2e-41	N	Adolescence	0.70649	18.3074	0.02197	3.33e-63
rs7385793	7	64882501	T	C	0.388	cg12143784	7	64541923	0.61442	14.1382	0.02958	1.64e-40	N	Adolescence	0.71524	18.4207	0.02306	7.54e-64
rs11769148	7	64693474	G	A	0.399	cg12143784	7	64541923	0.6088	14.1285	0.0279	1.83e-40	N	Adolescence	0.69555	17.8735	0.02182	9.54e-61
rs2419417	7	64690164	T	C	0.399	cg12143784	7	64541923	0.6088	14.1285	0.0279	1.83e-40	N	Adolescence	0.69555	17.8735	0.02182	9.54e-61
rs2900858	7	64692326	G	C	0.399	cg12143784	7	64541923	0.6088	14.1285	0.0279	1.83e-40	N	Adolescence	0.69555	17.8735	0.02182	9.54e-61
rs3079196	7	64689962	D	R	0.399	cg12143784	7	64541923	0.6088	14.1285	0.0279	1.83e-40	N	Adolescence	0.69555	17.8735	0.02182	9.54e-61
rs34739196	7	64696330	T	C	0.399	cg12143784	7	64541923	0.6088	14.1285	0.0279	1.83e-40	N	Adolescence	0.69555	17.8735	0.02182	9.54e-61
rs7799516	7	64692186	T	C	0.399	cg12143784	7	64541923	0.6088	14.1285	0.0279	1.83e-40	N	Adolescence	0.69555	17.8735	0.02182	9.54e-61
rs61294225	2	231923739	G	A	0.16	cg07929768	2	232055508	0.76906	14.1267	0.05672	1.87e-40	N	Adolescence	0.87784	18.6347	0.08912	4.5e-65
rs13411148	2	231918754	T	C	0.165	cg07929768	2	232055508	0.75944	14.1114	0.04901	2.22e-40	N	Adolescence	0.86626	18.5884	0.08545	8.29e-65
rs13223327	7	64695829	T	C	0.398	cg12143784	7	64541923	0.60689	14.1023	0.0279	2.46e-40	N	Adolescence	0.69369	17.8453	0.02182	1.37e-60
rs75563053	7	64748241	T	C	0.388	cg12143784	7	64541923	0.61397	14.0976	0.0257	2.6e-40	N	Adolescence	0.70152	17.9778	0.021	2.46e-61
rs75563053	7	64748241	T	C	0.388	cg12143784	7	64541923	0.61397	14.0976	0.0257	2.6e-40	N	Childhood	0.59325	14.9341	0.02238	7.42e-45
rs593619	7	64697544	A	G	0.4	cg12143784	7	64541923	0.60532	14.062	0.02657	3.88e-40	N	Adolescence	0.69446	17.8808	0.02154	8.67e-61
rs594456	7	64697346	T	C	0.4	cg12143784	7	64541923	0.60532	14.062	0.02657	3.88e-40	N	Adolescence	0.69446	17.8808	0.02154	8.67e-61
rs113034585	7	64717376	A	G	0.397	cg12143784	7	64541923	0.60335	13.9788	0.02775	9.86e-40	N	Adolescence	0.69698	17.935	0.02221	4.29e-61
rs12536289	7	64714034	A	G	0.397	cg12143784	7	64541923	0.60335	13.9788	0.02775	9.86e-40	N	Adolescence	0.69698	17.935	0.02221	4.29e-61
rs13227242	7	64707237	A	G	0.397	cg12143784	7	64541923	0.60335	13.9788	0.02775	9.86e-40	N	Adolescence	0.69698	17.935	0.02221	4.29e-61
rs13227243	7	64707243	A	G	0.397	cg12143784	7	64541923	0.60335	13.9788	0.02775	9.86e-40	N	Adolescence	0.69698	17.935	0.02221	4.29e-61
rs13227507	7	64707429	A	G	0.397	cg12143784	7	64541923	0.60335	13.9788	0.02775	9.86e-40	N	Adolescence	0.69698	17.935	0.02221	4.29e-61
rs142293992	7	64714111	D	R	0.397	cg12143784	7	64541923	0.60335	13.9788	0.02775	9.86e-40	N	Adolescence	0.69698	17.935	0.02221	4.29e-61
rs17710097	7	64727862	A	G	0.397	cg12143784	7	64541923	0.60335	13.9788	0.02775	9.86e-40	N	Adolescence	0.69698	17.935	0.02221	4.29e-61
rs17782771	7	64727166	C	G	0.397	cg12143784	7	64541923	0.60335	13.9788	0.02775	9.86e-40	N	Adolescence	0.69698	17.935	0.02221	4.29e-61
rs28496606	7	64701910	A	G	0.397	cg12143784	7	64541923	0.60335	13.9788	0.02775	9.86e-40	N	Adolescence	0.69698	17.935	0.02221	4.29e-61
rs3899200	7	64710141	T	G	0.397	cg12143784	7	64541923	0.60335	13.9788	0.02775	9.86e-40	N	Adolescence	0.69698	17.935	0.02221	4.29e-61
rs66671129	7	64712912	T	C	0.397	cg12143784	7	64541923	0.60335	13.9788	0.02775	9.86e-40	N	Adolescence	0.69698	17.935	0.02221	4.29e-61
rs7778919	7	64726113	A	G	0.397	cg12143784	7	64541923	0.60335	13.9788	0.02775	9.86e-40	N	Adolescence	0.69698	17.935	0.02221	4.29e-61
rs78138873	7	64717510	C	A	0.397	cg12143784	7	64541923	0.60335	13.9788	0.02775	9.86e-40	N	Adolescence	0.69698	17.935	0.02221	4.29e-61
rs9769692	7	64725535	T	C	0.397	cg12143784	7	64541923	0.60335	13.9788	0.02775	9.86e-40	N	Adolescence	0.69698	17.935	0.02221	4.29e-61
rs7606037	2	232054576	C	T	0.336	cg07929768	2	232055508	0.61475	13.9459	0.03329	1.42e-39	N	Adolescence	0.76732	20.8597	0.07683	4.17e-78
rs7796291	7	64717219	C	T	0.396	cg12143784	7	64541923	0.60097	13.924	0.02772	1.82e-39	N	Adolescence	0.69653	17.9378	0.02211	4.14e-61
rs7796291	7	64717219	C	T	0.396	cg12143784	7	64541923	0.60097	13.924	0.02772	1.82e-39	N	Childhood	0.59318	15.1074	0.02234	9.5e-46
rs657560	7	64700434	C	T	0.399	cg12143784	7	64541923	0.6012	13.9074	0.02657	2.19e-39	N	Adolescence	0.69359	17.8039	0.02182	2.35e-60
rs7808743	7	64717208	A	G	0.396	cg12143784	7	64541923	0.60129	13.8984	0.02639	2.42e-39	N	Adolescence	0.69311	17.7702	0.02182	3.63e-60
rs7808743	7	64717208	A	G	0.396	cg12143784	7	64541923	0.60129	13.8984	0.02639	2.42e-39	N	Childhood	0.59347	15.117	0.02234	8.48e-46
rs2418470	7	64830594	G	A	0.404	cg12143784	7	64541923	0.60772	13.8864	0.02651	2.77e-39	N	Adolescence	0.73745	19.2104	0.02363	2.15e-68
rs2418470	7	64830594	G	A	0.404	cg12143784	7	64541923	0.60772	13.8864	0.02651	2.77e-39	N	Childhood	0.61397	15.6567	0.02242	1.29e-48
rs62193695	2	231918203	T	A	0.164	cg07929768	2	232055508	0.75568	13.8812	0.06445	2.94e-39	N	Adolescence	0.86306	18.2983	0.08926	3.75e-63
rs6437005	2	232055735	G	A	0.335	cg07929768	2	232055508	0.61318	13.8648	0.03321	3.53e-39	N	Adolescence	0.76723	20.7953	0.07612	1.01e-77
rs13411443	2	231918871	C	G	0.167	cg07929768	2	232055508	0.74715	13.8546	0.05672	3.95e-39	N	Adolescence	0.85104	18.1887	0.08538	1.57e-62
rs4018034	2	232142258	I	R	0.247	cg07929768	2	232055508	0.65329	13.8496	0.04559	4.18e-39	N	Adolescence	0.76365	18.9219	0.08236	1e-66
rs62197345	2	232126698	A	C	0.256	cg27665808	2	232055229	0.63687	13.7395	0.07266	1.42e-38	N	Childhood	0.72504	16.6049	0.05658	1.07e-53
rs4718198	7	64666923	A	G	0.4	cg12143784	7	64541923	0.59407	13.7358	0.02639	1.48e-38	N	Adolescence	0.68542	17.5797	0.02064	4.25e-59
rs181908062	7	64718134	A	G	0.39	cg12143784	7	64541923	0.59182	13.735	0.0286	1.49e-38	N	Adolescence	0.68437	17.6053	0.02145	3.05e-59
rs2072451	19	50299408	G	T	0.496	cg10751382	19	50391554	0.54358	13.7225	0.13088	1.72e-38	N	Adolescence	0.58254	14.8192	0.06504	2.77e-44
rs200093423	7	64686600	D	R	0.403	cg12143784	7	64541923	0.59072	13.6957	0.02613	2.31e-38	N	Adolescence	0.68061	17.4686	0.02132	1.77e-58
rs201668815	7	64686577	D	R	0.403	cg12143784	7	64541923	0.59072	13.6957	0.02613	2.31e-38	N	Adolescence	0.68061	17.4686	0.02132	1.77e-58
rs35513558	7	64681703	A	G	0.403	cg12143784	7	64541923	0.59072	13.6957	0.02613	2.31e-38	N	Adolescence	0.68061	17.4686	0.02132	1.77e-58
rs4718201	7	64683929	T	C	0.403	cg12143784	7	64541923	0.59072	13.6957	0.02613	2.31e-38	N	Adolescence	0.68061	17.4686	0.02132	1.77e-58
rs73143330	7	64679574	G	A	0.403	cg12143784	7	64541923	0.59072	13.6957	0.02613	2.31e-38	N	Adolescence	0.68061	17.4686	0.02132	1.77e-58
rs549970	7	64759913	T	A	0.415	cg12143784	7	64541923	0.59738	13.6091	0.0265	6e-38	N	Adolescence	0.6896	17.5542	0.0216	5.89e-59
rs11767453	7	64671074	T	C	0.401	cg12143784	7	64541923	0.58398	13.5589	0.02589	1.04e-37	N	Adolescence	0.67167	17.2301	0.02116	3.74e-57
rs11767453	7	64671074	T	C	0.401	cg12143784	7	64541923	0.58398	13.5589	0.02589	1.04e-37	N	Childhood	0.57892	14.7668	0.02216	5.34e-44
rs12669040	7	64675390	T	G	0.401	cg12143784	7	64541923	0.58398	13.5589	0.02589	1.04e-37	N	Adolescence	0.67167	17.2301	0.02116	3.74e-57
rs12669040	7	64675390	T	G	0.401	cg12143784	7	64541923	0.58398	13.5589	0.02589	1.04e-37	N	Childhood	0.57892	14.7668	0.02216	5.34e-44
rs141830477	7	64670116	T	C	0.401	cg12143784	7	64541923	0.58398	13.5589	0.02589	1.04e-37	N	Adolescence	0.67167	17.2301	0.02116	3.74e-57
rs141830477	7	64670116	T	C	0.401	cg12143784	7	64541923	0.58398	13.5589	0.02589	1.04e-37	N	Childhood	0.57892	14.7668	0.02216	5.34e-44
rs9768289	7	64674971	C	T	0.401	cg12143784	7	64541923	0.58398	13.5589	0.02589	1.04e-37	N	Adolescence	0.67167	17.2301	0.02116	3.74e-57
rs9768289	7	64674971	C	T	0.401	cg12143784	7	64541923	0.58398	13.5589	0.02589	1.04e-37	N	Childhood	0.57892	14.7668	0.02216	5.34e-44
rs55761641	7	64718394	T	C	0.393	cg12143784	7	64541923	0.58201	13.4471	0.02709	3.56e-37	N	Adolescence	0.68808	17.7748	0.02219	3.42e-60
rs55761641	7	64718394	T	C	0.393	cg12143784	7	64541923	0.58201	13.4471	0.02709	3.56e-37	N	Childhood	0.58555	14.9535	0.02233	5.91e-45
rs4718196	7	64643161	T	A	0.404	cg12143784	7	64541923	0.57927	13.3679	0.02611	8.46e-37	N	Adolescence	0.68174	17.5517	0.0204	6.08e-59
rs7584535	2	232106857	T	C	0.28	cg27665808	2	232055229	0.61832	13.3559	0.07761	9.64e-37	N	Adolescence	0.72131	16.2231	0.06982	1.18e-51
rs7584535	2	232106857	T	C	0.28	cg27665808	2	232055229	0.61832	13.3559	0.07761	9.64e-37	N	Childhood	0.71805	16.3862	0.05786	1.64e-52
rs12621567	2	232118813	C	T	0.282	cg27665808	2	232055229	0.61841	13.3526	0.07761	1e-36	N	Childhood	0.71988	16.4342	0.05801	9.03e-53
rs13415839	2	232126534	T	C	0.282	cg27665808	2	232055229	0.61841	13.3526	0.07761	1e-36	N	Childhood	0.71988	16.4342	0.05801	9.03e-53
rs13428369	2	232125632	C	T	0.282	cg27665808	2	232055229	0.61841	13.3526	0.07761	1e-36	N	Childhood	0.71988	16.4342	0.05801	9.03e-53
rs200139389	2	232127714	D	R	0.282	cg27665808	2	232055229	0.61841	13.3526	0.07761	1e-36	N	Childhood	0.71988	16.4342	0.05801	9.03e-53
rs36036355	2	232127712	D	R	0.282	cg27665808	2	232055229	0.61841	13.3526	0.07761	1e-36	N	Childhood	0.71988	16.4342	0.05801	9.03e-53
rs6711312	2	232122348	C	T	0.282	cg27665808	2	232055229	0.61841	13.3526	0.07761	1e-36	N	Childhood	0.71988	16.4342	0.05801	9.03e-53
rs6724253	2	232121998	G	A	0.282	cg27665808	2	232055229	0.61841	13.3526	0.07761	1e-36	N	Childhood	0.71988	16.4342	0.05801	9.03e-53
rs7598478	2	232115887	T	C	0.282	cg27665808	2	232055229	0.61841	13.3526	0.07761	1e-36	N	Childhood	0.71988	16.4342	0.05801	9.03e-53
rs9973370	2	232095587	G	A	0.28	cg27665808	2	232055229	0.61789	13.3473	0.07742	1.06e-36	N	Childhood	0.72028	16.4571	0.05801	6.79e-53
rs12470450	2	232113888	A	T	0.281	cg27665808	2	232055229	0.61759	13.3337	0.07742	1.23e-36	N	Childhood	0.71901	16.4114	0.05801	1.2e-52
rs1881484	2	232112450	G	C	0.281	cg27665808	2	232055229	0.61759	13.3337	0.07742	1.23e-36	N	Childhood	0.71901	16.4114	0.05801	1.2e-52
rs6437010	2	232113263	C	G	0.281	cg27665808	2	232055229	0.61759	13.3337	0.07742	1.23e-36	N	Childhood	0.71901	16.4114	0.05801	1.2e-52
rs6704770	2	232109816	G	T	0.281	cg27665808	2	232055229	0.61759	13.3337	0.07742	1.23e-36	N	Childhood	0.71901	16.4114	0.05801	1.2e-52
rs6437008	2	232091948	G	C	0.337	cg07929768	2	232055508	0.58904	13.3194	0.03194	1.43e-36	N	Adolescence	0.74032	19.927	0.07677	1.4e-72
rs28972313	7	64687000	A	G	0.395	cg12143784	7	64541923	0.57972	13.3155	0.02589	1.5e-36	N	Adolescence	0.67012	17.0155	0.02086	5.73e-56
rs28972313	7	64687000	A	G	0.395	cg12143784	7	64541923	0.57972	13.3155	0.02589	1.5e-36	N	Childhood	0.5722	14.4226	0.02167	2.97e-42
rs73352007	7	64640357	T	A	0.404	cg12143784	7	64541923	0.57731	13.3123	0.02611	1.55e-36	N	Adolescence	0.68324	17.6047	0.02041	3.07e-59
rs10544278	2	232139717	D	R	0.221	cg27665808	2	232055229	0.64631	13.1637	0.07675	7.76e-36	N	Adolescence	0.76078	16.2814	0.07516	5.72e-52
rs10544278	2	232139717	D	R	0.221	cg27665808	2	232055229	0.64631	13.1637	0.07675	7.76e-36	N	Childhood	0.74974	16.1829	0.06329	2.04e-51
rs59823376	2	232138371	A	G	0.222	cg27665808	2	232055229	0.64284	13.1412	0.0763	9.89e-36	N	Adolescence	0.75992	16.335	0.07443	2.94e-52
rs59823376	2	232138371	A	G	0.222	cg27665808	2	232055229	0.64284	13.1412	0.0763	9.89e-36	N	Childhood	0.74854	16.2288	0.06488	1.16e-51
rs72985811	2	232137146	C	A	0.222	cg27665808	2	232055229	0.64284	13.1412	0.0763	9.89e-36	N	Adolescence	0.75992	16.335	0.07443	2.94e-52
rs72985811	2	232137146	C	A	0.222	cg27665808	2	232055229	0.64284	13.1412	0.0763	9.89e-36	N	Childhood	0.74854	16.2288	0.06488	1.16e-51
rs658360	7	64700289	G	A	0.442	cg12143784	7	64541923	0.56188	13.141	0.0251	9.92e-36	N	Childhood	0.56863	14.7277	0.0211	8.45e-44
rs35723371	7	64691780	T	A	0.444	cg12143784	7	64541923	0.56094	13.1075	0.0251	1.42e-35	N	Childhood	0.57115	14.8217	0.02116	2.8e-44
rs495336	7	64698500	C	T	0.444	cg12143784	7	64541923	0.56094	13.1075	0.0251	1.42e-35	N	Childhood	0.57115	14.8217	0.02116	2.8e-44
rs673957	7	64699105	G	A	0.444	cg12143784	7	64541923	0.56094	13.1075	0.0251	1.42e-35	N	Childhood	0.57115	14.8217	0.02116	2.8e-44
rs7792874	7	64694563	C	A	0.444	cg12143784	7	64541923	0.56094	13.1075	0.0251	1.42e-35	N	Childhood	0.57115	14.8217	0.02116	2.8e-44
rs7796077	7	64694241	A	T	0.444	cg12143784	7	64541923	0.56094	13.1075	0.0251	1.42e-35	N	Childhood	0.57115	14.8217	0.02116	2.8e-44
rs200494705	7	64686896	D	R	0.397	cg12143784	7	64541923	0.56656	13.0275	0.02524	3.37e-35	N	Adolescence	0.66494	16.9483	0.0204	1.34e-55
rs200494705	7	64686896	D	R	0.397	cg12143784	7	64541923	0.56656	13.0275	0.02524	3.37e-35	N	Childhood	0.56741	14.3599	0.02155	6.13e-42
rs2419281	7	64692651	G	C	0.444	cg12143784	7	64541923	0.55848	13.0206	0.02508	3.62e-35	N	Childhood	0.56925	14.7412	0.0211	7.21e-44
rs9973970	2	232097383	C	T	0.338	cg07929768	2	232055508	0.57805	12.9095	0.03207	1.19e-34	N	Adolescence	0.72965	19.3306	0.07675	4.32e-69
rs10198572	2	232096723	A	G	0.338	cg07929768	2	232055508	0.57799	12.8995	0.03207	1.32e-34	N	Adolescence	0.73054	19.3507	0.07677	3.3e-69
rs147245510	2	232117819	I	R	0.339	cg07929768	2	232055508	0.57474	12.8035	0.03199	3.68e-34	N	Adolescence	0.72116	18.9803	0.07654	4.62e-67
rs11897387	2	232122576	C	T	0.341	cg07929768	2	232055508	0.5759	12.8013	0.03199	3.76e-34	N	Adolescence	0.71961	18.8659	0.07654	2.11e-66
rs142611306	7	64667586	T	C	0.426	cg12143784	7	64541923	0.55769	12.756	0.02535	6.09e-34	N	Childhood	0.55618	14.0279	0.02107	2.78e-40
rs13222390	7	64748600	A	G	0.353	cg12143784	7	64541923	0.59034	12.7449	0.02919	6.84e-34	N	Adolescence	0.67012	15.9663	0.01965	2.79e-50
rs10169827	2	232049722	G	A	0.316	cg07929768	2	232055508	0.57466	12.7447	0.03107	6.86e-34	N	Adolescence	0.71298	18.407	0.07364	9.02e-64
rs10179264	2	232050603	C	G	0.316	cg07929768	2	232055508	0.57466	12.7447	0.03107	6.86e-34	N	Adolescence	0.71298	18.407	0.07364	9.02e-64
rs10202608	2	232050653	G	A	0.316	cg07929768	2	232055508	0.57466	12.7447	0.03107	6.86e-34	N	Adolescence	0.71298	18.407	0.07364	9.02e-64
rs10202782	2	232050796	G	A	0.316	cg07929768	2	232055508	0.57466	12.7447	0.03107	6.86e-34	N	Adolescence	0.71298	18.407	0.07364	9.02e-64
rs10202806	2	232050852	G	A	0.316	cg07929768	2	232055508	0.57466	12.7447	0.03107	6.86e-34	N	Adolescence	0.71298	18.407	0.07364	9.02e-64
rs10206322	2	232050072	C	T	0.316	cg07929768	2	232055508	0.57466	12.7447	0.03107	6.86e-34	N	Adolescence	0.71298	18.407	0.07364	9.02e-64
rs6727962	2	232045268	A	G	0.316	cg07929768	2	232055508	0.57466	12.7447	0.03107	6.86e-34	N	Adolescence	0.71298	18.407	0.07364	9.02e-64
rs6755467	2	232044684	C	A	0.316	cg07929768	2	232055508	0.57466	12.7447	0.03107	6.86e-34	N	Adolescence	0.71298	18.407	0.07364	9.02e-64
rs13418346	2	232132374	A	G	0.339	cg07929768	2	232055508	0.57217	12.7339	0.03199	7.69e-34	N	Adolescence	0.72009	18.9398	0.07654	7.92e-67
rs10234467	7	64681511	G	A	0.448	cg12143784	7	64541923	0.5459	12.7338	0.02434	7.7e-34	N	Childhood	0.55997	14.5177	0.02093	9.84e-43
rs10250191	7	64684528	C	T	0.448	cg12143784	7	64541923	0.5459	12.7338	0.02434	7.7e-34	N	Childhood	0.55997	14.5177	0.02093	9.84e-43
rs12534142	7	64680883	A	G	0.448	cg12143784	7	64541923	0.5459	12.7338	0.02434	7.7e-34	N	Childhood	0.55997	14.5177	0.02093	9.84e-43
rs28877001	7	64684073	T	C	0.448	cg12143784	7	64541923	0.5459	12.7338	0.02434	7.7e-34	N	Childhood	0.55997	14.5177	0.02093	9.84e-43
rs4718200	7	64683848	G	A	0.448	cg12143784	7	64541923	0.5459	12.7338	0.02434	7.7e-34	N	Childhood	0.55997	14.5177	0.02093	9.84e-43
rs5884553	7	64677052	D	R	0.448	cg12143784	7	64541923	0.5459	12.7338	0.02434	7.7e-34	N	Childhood	0.55997	14.5177	0.02093	9.84e-43
rs34000658	7	64892516	A	G	0.444	cg12143784	7	64541923	0.54864	12.7005	0.02506	1.1e-33	N	Childhood	0.56626	14.5968	0.02081	3.91e-43
rs34056184	7	64892514	A	G	0.444	cg12143784	7	64541923	0.54864	12.7005	0.02506	1.1e-33	N	Childhood	0.56626	14.5968	0.02081	3.91e-43
rs7797915	7	64895213	T	C	0.44	cg12143784	7	64541923	0.54528	12.6915	0.02536	1.2e-33	N	Childhood	0.56362	14.6057	0.02041	3.53e-43
rs202182312	7	64748588	I	R	0.354	cg12143784	7	64541923	0.58612	12.6253	0.02919	2.42e-33	N	Adolescence	0.66538	15.807	0.01968	1.96e-49
rs12463656	2	232036396	A	G	0.161	cg27665808	2	232055229	0.71172	12.6142	0.07676	2.72e-33	N	Adolescence	0.84892	15.731	0.07273	4.97e-49
rs12468767	2	232036843	G	T	0.161	cg27665808	2	232055229	0.71172	12.6142	0.07676	2.72e-33	N	Adolescence	0.84892	15.731	0.07273	4.97e-49
rs13394402	2	231968920	T	G	0.161	cg27665808	2	232055229	0.71172	12.6142	0.07676	2.72e-33	N	Adolescence	0.84892	15.731	0.07273	4.97e-49
rs13402242	2	232029568	G	A	0.161	cg27665808	2	232055229	0.71172	12.6142	0.07676	2.72e-33	N	Adolescence	0.84892	15.731	0.07273	4.97e-49
rs62193731	2	232006786	A	G	0.161	cg27665808	2	232055229	0.71172	12.6142	0.07676	2.72e-33	N	Adolescence	0.84892	15.731	0.07273	4.97e-49
rs72983619	2	232004469	A	G	0.161	cg27665808	2	232055229	0.71172	12.6142	0.07676	2.72e-33	N	Adolescence	0.84892	15.731	0.07273	4.97e-49
rs201907117	2	232102487	D	R	0.216	cg07929768	2	232055508	0.63343	12.6119	0.03782	2.79e-33	N	Childhood	0.74481	17.0395	0.10273	4.49e-56
rs13222391	7	64748601	C	G	0.352	cg12143784	7	64541923	0.58438	12.6089	0.02919	2.87e-33	N	Childhood	0.56885	13.4814	0.02223	1.31e-37
rs7604042	2	232135541	T	A	0.336	cg07929768	2	232055508	0.56455	12.561	0.03138	4.76e-33	N	Adolescence	0.71143	18.6696	0.07591	2.84e-65
rs11879637	19	50307408	A	G	0.436	cg10751382	19	50391554	0.50638	12.5515	0.12715	5.25e-33	N	Adolescence	0.55153	13.8615	0.06128	1.78e-39
rs11879637	19	50307408	A	G	0.436	cg10751382	19	50391554	0.50638	12.5515	0.12715	5.25e-33	N	Childhood	0.53536	13.4862	0.08958	1.24e-37
rs201907117	2	232102487	D	R	0.216	cg27665808	2	232055229	0.63349	12.527	0.06717	6.79e-33	N	Childhood	0.63921	13.0456	0.053	1.59e-35
rs8104825	19	50315423	A	G	0.435	cg10751382	19	50391554	0.50566	12.5199	0.12688	7.31e-33	N	Adolescence	0.55179	13.8594	0.06141	1.83e-39
rs8104825	19	50315423	A	G	0.435	cg10751382	19	50391554	0.50566	12.5199	0.12688	7.31e-33	N	Childhood	0.53525	13.4731	0.08976	1.44e-37
rs4018034	2	232142258	I	R	0.247	cg27665808	2	232055229	0.60474	12.5113	0.07652	8e-33	N	Adolescence	0.69716	14.9686	0.0714	4.75e-45
rs12471957	2	231993738	T	G	0.16	cg27665808	2	232055229	0.70812	12.5092	0.07666	8.18e-33	N	Adolescence	0.84538	15.612	0.07269	2.11e-48
rs17440378	2	231979355	T	C	0.16	cg27665808	2	232055229	0.70812	12.5092	0.07666	8.18e-33	N	Adolescence	0.84538	15.612	0.07269	2.11e-48
rs7248071	19	50301844	G	T	0.436	cg10751382	19	50391554	0.50342	12.4777	0.12525	1.14e-32	N	Childhood	0.53471	13.4812	0.08951	1.31e-37
rs7251463	19	50301545	A	G	0.436	cg10751382	19	50391554	0.50342	12.4777	0.12525	1.14e-32	N	Childhood	0.53471	13.4812	0.08951	1.31e-37
rs1589587	10	42512897	C	G	0.474	cg16633951	10	42971575	-0.5281	-12.4748	0.0499	1.17e-32	N	Childhood	-0.59938	-15.7364	0.05567	4.87e-49
rs2334905	10	42512030	G	A	0.474	cg16633951	10	42971575	-0.5281	-12.4748	0.0499	1.17e-32	N	Childhood	-0.59938	-15.7364	0.05567	4.87e-49
rs10797137	10	42498727	C	A	0.47	cg16633951	10	42971575	-0.53045	-12.4702	0.05141	1.23e-32	N	Childhood	-0.60532	-15.8407	0.05673	1.37e-49
rs10908980	10	42508295	T	C	0.47	cg16633951	10	42971575	-0.53045	-12.4702	0.05141	1.23e-32	N	Childhood	-0.60532	-15.8407	0.05673	1.37e-49
rs10908982	10	42515428	T	G	0.47	cg16633951	10	42971575	-0.53045	-12.4702	0.05141	1.23e-32	N	Childhood	-0.60532	-15.8407	0.05673	1.37e-49
rs1589588	10	42467985	T	C	0.47	cg16633951	10	42971575	-0.53045	-12.4702	0.05141	1.23e-32	N	Childhood	-0.60532	-15.8407	0.05673	1.37e-49
rs1818808	10	42509918	T	C	0.47	cg16633951	10	42971575	-0.53045	-12.4702	0.05141	1.23e-32	N	Childhood	-0.60532	-15.8407	0.05673	1.37e-49
rs9665548	10	42447593	C	G	0.47	cg16633951	10	42971575	-0.53045	-12.4702	0.05141	1.23e-32	N	Childhood	-0.60532	-15.8407	0.05673	1.37e-49
rs9794047	10	42506274	A	C	0.47	cg16633951	10	42971575	-0.53045	-12.4702	0.05141	1.23e-32	N	Childhood	-0.60532	-15.8407	0.05673	1.37e-49
rs9794761	10	42497889	T	C	0.47	cg16633951	10	42971575	-0.53045	-12.4702	0.05141	1.23e-32	N	Childhood	-0.60532	-15.8407	0.05673	1.37e-49
rs62455723	7	64656388	A	G	0.45	cg12143784	7	64541923	0.53617	12.4689	0.02297	1.25e-32	N	Childhood	0.56483	14.668	0.02112	1.7e-43
rs12469096	2	231921586	C	G	0.162	cg27665808	2	232055229	0.69532	12.4351	0.07512	1.77e-32	N	Adolescence	0.82604	15.3941	0.07153	2.94e-47
rs9665583	10	42610826	G	C	0.459	cg16633951	10	42971575	-0.53373	-12.4298	0.05126	1.87e-32	N	Childhood	-0.61025	-15.9058	0.05758	6.16e-50
rs6437001	2	232013304	T	G	0.312	cg07929768	2	232055508	0.56168	12.3854	0.03061	2.97e-32	N	Adolescence	0.70243	18.0105	0.07369	1.61e-61
rs9665333	10	42605591	T	A	0.46	cg16633951	10	42971575	-0.53057	-12.3648	0.05113	3.68e-32	N	Childhood	-0.60736	-15.8379	0.05756	1.41e-49
rs11879607	19	50307344	T	C	0.456	cg10751382	19	50391554	0.49919	12.3481	0.12474	4.38e-32	N	Childhood	0.51519	12.8488	0.08416	1.34e-34
rs35344605	19	50309860	D	R	0.457	cg10751382	19	50391554	0.49928	12.335	0.12385	5.01e-32	N	Childhood	0.50858	12.6368	0.08589	1.3e-33
rs142104717	19	50309615	D	R	0.456	cg10751382	19	50391554	0.49939	12.3313	0.12488	5.21e-32	N	Childhood	0.51544	12.8345	0.08435	1.56e-34
rs7251269	19	50301653	G	A	0.457	cg10751382	19	50391554	0.49758	12.3227	0.1246	5.69e-32	N	Childhood	0.51741	12.9369	0.08435	5.17e-35
rs10909011	10	42436301	G	A	0.462	cg16633951	10	42971575	-0.52931	-12.3024	0.05039	7.03e-32	N	Childhood	-0.60014	-15.5615	0.05745	4.07e-48
rs11265994	10	42477634	T	C	0.462	cg16633951	10	42971575	-0.52931	-12.3024	0.05039	7.03e-32	N	Childhood	-0.60014	-15.5615	0.05745	4.07e-48
rs1608197	10	42497519	A	G	0.462	cg16633951	10	42971575	-0.52931	-12.3024	0.05039	7.03e-32	N	Childhood	-0.60014	-15.5615	0.05745	4.07e-48
rs9664628	10	42469340	G	C	0.462	cg16633951	10	42971575	-0.52931	-12.3024	0.05039	7.03e-32	N	Childhood	-0.60014	-15.5615	0.05745	4.07e-48
rs10564756	2	232042278	D	R	0.312	cg07929768	2	232055508	0.55832	12.2969	0.03061	7.44e-32	N	Adolescence	0.70039	17.9381	0.07377	4.12e-61
rs2303349	2	232030861	G	A	0.312	cg07929768	2	232055508	0.55832	12.2969	0.03061	7.44e-32	N	Adolescence	0.70039	17.9381	0.07377	4.12e-61
rs6437003	2	232030301	T	C	0.312	cg07929768	2	232055508	0.55832	12.2969	0.03061	7.44e-32	N	Adolescence	0.70039	17.9381	0.07377	4.12e-61
rs61294225	2	231923739	G	A	0.16	cg27665808	2	232055229	0.69016	12.2848	0.07498	8.43e-32	N	Adolescence	0.82478	15.3157	0.0715	7.55e-47
rs1025107	2	232034342	T	C	0.313	cg07929768	2	232055508	0.55806	12.2846	0.0307	8.45e-32	N	Adolescence	0.70108	17.9531	0.07379	3.39e-61
rs2032953	2	232035793	T	C	0.313	cg07929768	2	232055508	0.55806	12.2846	0.0307	8.45e-32	N	Adolescence	0.70108	17.9531	0.07379	3.39e-61
rs2303350	2	232030555	A	G	0.313	cg07929768	2	232055508	0.55806	12.2846	0.0307	8.45e-32	N	Adolescence	0.70108	17.9531	0.07379	3.39e-61
rs2303351	2	232030510	A	C	0.313	cg07929768	2	232055508	0.55806	12.2846	0.0307	8.45e-32	N	Adolescence	0.70108	17.9531	0.07379	3.39e-61
rs6749	2	232035429	A	G	0.313	cg07929768	2	232055508	0.55806	12.2846	0.0307	8.45e-32	N	Adolescence	0.70108	17.9531	0.07379	3.39e-61
rs11893395	2	232022981	A	G	0.313	cg07929768	2	232055508	0.55731	12.2647	0.03052	1.04e-31	N	Adolescence	0.70093	17.9477	0.07373	3.64e-61
rs4350740	2	232018979	G	C	0.313	cg07929768	2	232055508	0.55731	12.2647	0.03052	1.04e-31	N	Adolescence	0.70093	17.9477	0.07373	3.64e-61
rs6437000	2	231977527	A	C	0.288	cg07929768	2	232055508	0.56869	12.2601	0.03279	1.09e-31	N	Adolescence	0.7345	18.7076	0.07557	1.72e-65
rs7565408	2	231996576	A	G	0.313	cg07929768	2	232055508	0.55705	12.2524	0.03061	1.18e-31	N	Adolescence	0.70162	17.9628	0.07377	2.99e-61
rs11266155	10	42422535	C	G	0.462	cg16633951	10	42971575	-0.5244	-12.2453	0.04978	1.27e-31	N	Childhood	-0.59363	-15.4628	0.0567	1.34e-47
rs9664345	10	42465390	C	G	0.476	cg16633951	10	42971575	-0.51987	-12.2289	0.04975	1.5e-31	N	Childhood	-0.59295	-15.5293	0.05567	6.01e-48
rs7905348	10	42607955	T	G	0.45	cg16633951	10	42971575	-0.52488	-12.2272	0.04998	1.53e-31	N	Childhood	-0.59487	-15.4079	0.05736	2.6e-47
rs7908581	10	42607956	T	C	0.45	cg16633951	10	42971575	-0.52488	-12.2272	0.04998	1.53e-31	N	Childhood	-0.59487	-15.4079	0.05736	2.6e-47
rs7603942	2	231957261	A	C	0.314	cg07929768	2	232055508	0.55441	12.2235	0.0305	1.59e-31	N	Adolescence	0.69728	17.8731	0.07397	9.58e-61
rs7604219	2	231957324	A	G	0.314	cg07929768	2	232055508	0.55441	12.2235	0.0305	1.59e-31	N	Adolescence	0.69728	17.8731	0.07397	9.58e-61
rs6707708	2	232020821	C	T	0.314	cg07929768	2	232055508	0.55415	12.2168	0.03072	1.7e-31	N	Adolescence	0.70102	18.006	0.07388	1.7e-61
rs12617646	2	231923053	T	C	0.315	cg07929768	2	232055508	0.55103	12.2147	0.02968	1.74e-31	N	Adolescence	0.69485	17.914	0.07358	5.64e-61
rs13416929	2	231931216	A	G	0.315	cg07929768	2	232055508	0.55103	12.2147	0.02968	1.74e-31	N	Adolescence	0.69485	17.914	0.07358	5.64e-61
rs2161891	2	231954091	G	A	0.315	cg07929768	2	232055508	0.55103	12.2147	0.02968	1.74e-31	N	Adolescence	0.69485	17.914	0.07358	5.64e-61
rs2303357	2	231949946	A	G	0.315	cg07929768	2	232055508	0.55103	12.2147	0.02968	1.74e-31	N	Adolescence	0.69485	17.914	0.07358	5.64e-61
rs35167435	2	231929630	D	R	0.315	cg07929768	2	232055508	0.55103	12.2147	0.02968	1.74e-31	N	Adolescence	0.69485	17.914	0.07358	5.64e-61
rs3815844	2	231927569	T	G	0.315	cg07929768	2	232055508	0.55103	12.2147	0.02968	1.74e-31	N	Adolescence	0.69485	17.914	0.07358	5.64e-61
rs6746156	2	231967210	G	A	0.315	cg07929768	2	232055508	0.55103	12.2147	0.02968	1.74e-31	N	Adolescence	0.69485	17.914	0.07358	5.64e-61
rs7581418	2	231930566	A	G	0.315	cg07929768	2	232055508	0.55103	12.2147	0.02968	1.74e-31	N	Adolescence	0.69485	17.914	0.07358	5.64e-61
rs1608194	10	42471859	A	G	0.463	cg16633951	10	42971575	-0.52507	-12.2075	0.05024	1.87e-31	N	Childhood	-0.59922	-15.5599	0.05703	4.15e-48
rs10430806	10	42522198	T	C	0.468	cg16633951	10	42971575	-0.52361	-12.2062	0.04932	1.9e-31	N	Childhood	-0.59009	-15.3419	0.05641	5.75e-47
rs10199752	2	231969554	C	A	0.314	cg07929768	2	232055508	0.55373	12.2057	0.0305	1.91e-31	N	Adolescence	0.70248	18.0584	0.07397	8.62e-62
rs60440887	2	231968815	I	R	0.314	cg07929768	2	232055508	0.55373	12.2057	0.0305	1.91e-31	N	Adolescence	0.70248	18.0584	0.07397	8.62e-62
rs12694886	2	231923559	C	T	0.316	cg07929768	2	232055508	0.5508	12.2027	0.02977	1.97e-31	N	Adolescence	0.69717	17.9775	0.07362	2.47e-61
rs13411316	2	231948801	A	G	0.316	cg07929768	2	232055508	0.5508	12.2027	0.02977	1.97e-31	N	Adolescence	0.69555	17.9292	0.0736	4.62e-61
rs13430145	2	231931133	C	T	0.316	cg07929768	2	232055508	0.5508	12.2027	0.02977	1.97e-31	N	Adolescence	0.69555	17.9292	0.0736	4.62e-61
rs2007131	2	231947432	A	C	0.316	cg07929768	2	232055508	0.5508	12.2027	0.02977	1.97e-31	N	Adolescence	0.69555	17.9292	0.0736	4.62e-61
rs2288147	2	231937505	G	A	0.316	cg07929768	2	232055508	0.5508	12.2027	0.02977	1.97e-31	N	Adolescence	0.69555	17.9292	0.0736	4.62e-61
rs3769990	2	231927665	A	G	0.316	cg07929768	2	232055508	0.5508	12.2027	0.02977	1.97e-31	N	Adolescence	0.69555	17.9292	0.0736	4.62e-61
rs60563689	2	231940592	G	A	0.316	cg07929768	2	232055508	0.5508	12.2027	0.02977	1.97e-31	N	Adolescence	0.69555	17.9292	0.0736	4.62e-61
rs6741145	2	231941252	G	A	0.316	cg07929768	2	232055508	0.5508	12.2027	0.02977	1.97e-31	N	Adolescence	0.69555	17.9292	0.0736	4.62e-61
rs7595464	2	231967610	G	A	0.316	cg07929768	2	232055508	0.5508	12.2027	0.02977	1.97e-31	N	Adolescence	0.69555	17.9292	0.0736	4.62e-61
rs906879	2	231948178	G	A	0.316	cg07929768	2	232055508	0.5508	12.2027	0.02977	1.97e-31	N	Adolescence	0.69555	17.9292	0.0736	4.62e-61
rs139649430	10	42427814	D	R	0.469	cg16633951	10	42971575	-0.5233	-12.2025	0.04928	1.97e-31	N	Childhood	-0.58877	-15.3045	0.0563	9.01e-47
rs9664985	10	42428682	G	A	0.469	cg16633951	10	42971575	-0.5233	-12.2025	0.04928	1.97e-31	N	Childhood	-0.58877	-15.3045	0.0563	9.01e-47
rs7606037	2	232054576	C	T	0.336	cg27665808	2	232055229	0.55422	12.2021	0.06309	1.98e-31	N	Adolescence	0.64969	14.7968	0.06653	3.61e-44
rs143538253	10	42437833	C	A	0.463	cg16633951	10	42971575	-0.52476	-12.1988	0.05024	2.05e-31	N	Childhood	-0.59494	-15.4168	0.05703	2.34e-47
rs7905461	10	42608040	C	G	0.449	cg16633951	10	42971575	-0.52304	-12.1917	0.0499	2.2e-31	N	Childhood	-0.58739	-15.1974	0.05725	3.25e-46
rs7905474	10	42608071	T	G	0.449	cg16633951	10	42971575	-0.52304	-12.1917	0.0499	2.2e-31	N	Childhood	-0.58739	-15.1974	0.05725	3.25e-46
rs7905476	10	42608072	T	G	0.449	cg16633951	10	42971575	-0.52304	-12.1917	0.0499	2.2e-31	N	Childhood	-0.58739	-15.1974	0.05725	3.25e-46
rs189869033	10	42440313	C	T	0.464	cg16633951	10	42971575	-0.52455	-12.1594	0.05024	3.07e-31	N	Childhood	-0.59632	-15.4506	0.05661	1.56e-47
rs10498257	2	231993038	T	A	0.312	cg07929768	2	232055508	0.55404	12.1382	0.03063	3.81e-31	N	Adolescence	0.70147	17.902	0.07392	6.59e-61
rs59886388	2	231995770	C	G	0.312	cg07929768	2	232055508	0.55404	12.1382	0.03063	3.81e-31	N	Adolescence	0.70147	17.902	0.07392	6.59e-61
rs7607338	2	231987955	A	C	0.312	cg07929768	2	232055508	0.55404	12.1382	0.03063	3.81e-31	N	Adolescence	0.70147	17.902	0.07392	6.59e-61
rs765458	2	231990667	A	G	0.312	cg07929768	2	232055508	0.55404	12.1382	0.03063	3.81e-31	N	Adolescence	0.70147	17.902	0.07392	6.59e-61
rs9732766	10	42489708	T	C	0.463	cg16633951	10	42971575	-0.52239	-12.1332	0.05024	4.01e-31	N	Childhood	-0.59687	-15.4814	0.05703	1.07e-47
rs12269267	10	42434410	A	G	0.464	cg16633951	10	42971575	-0.52202	-12.1288	0.05036	4.2e-31	N	Childhood	-0.59546	-15.4425	0.05651	1.72e-47
rs12355221	10	42443348	T	C	0.47	cg16633951	10	42971575	-0.52044	-12.1279	0.049	4.24e-31	N	Childhood	-0.58664	-15.2133	0.05636	2.69e-46
rs13411148	2	231918754	T	C	0.165	cg27665808	2	232055229	0.67362	12.1024	0.07594	5.51e-31	N	Adolescence	0.80091	14.9713	0.07027	4.6e-45
rs1851490	10	42456692	G	C	0.47	cg16633951	10	42971575	-0.51856	-12.0929	0.049	6.07e-31	N	Childhood	-0.58765	-15.2947	0.05628	1.01e-46
rs1549339	2	231982826	A	G	0.312	cg07929768	2	232055508	0.55223	12.0911	0.03051	6.18e-31	N	Adolescence	0.69706	17.747	0.07385	4.91e-60
rs6437005	2	232055735	G	A	0.335	cg27665808	2	232055229	0.55107	12.089	0.06161	6.32e-31	N	Adolescence	0.6483	14.7213	0.06694	8.78e-44
rs141418327	7	64947781	A	G	0.462	cg12143784	7	64541923	0.54234	12.0666	0.02531	7.94e-31	N	Childhood	0.59557	14.9586	0.02215	5.56e-45
rs3729641	19	50368116	A	C	0.222	cg10751382	19	50391554	0.58838	12.0547	0.15485	8.96e-31	N	Childhood	0.64225	13.5189	0.09227	8.63e-38
rs7780836	7	64786351	T	C	0.461	cg12143784	7	64541923	0.53648	12.0515	0.02499	9.27e-31	N	Childhood	0.57513	14.5103	0.02204	1.07e-42
rs10908961	10	42469894	A	G	0.468	cg16633951	10	42971575	-0.51679	-12.039	0.04916	1.05e-30	N	Adolescence	-0.52697	-12.8575	0.04898	1.19e-34
rs9665476	10	42492751	A	T	0.468	cg16633951	10	42971575	-0.51679	-12.039	0.04916	1.05e-30	N	Adolescence	-0.52697	-12.8575	0.04898	1.19e-34
rs58557553	10	42491288	I	R	0.469	cg16633951	10	42971575	-0.51681	-12.0225	0.04916	1.24e-30	N	Childhood	-0.58685	-15.2409	0.0563	1.93e-46
rs6437008	2	232091948	G	C	0.337	cg27665808	2	232055229	0.54412	12.0189	0.05878	1.29e-30	N	Adolescence	0.63052	14.346	0.06536	6.96e-42
rs10418141	19	50360046	A	C	0.313	cg10751382	19	50391554	0.523	12.0047	0.13023	1.49e-30	N	Childhood	0.60666	14.4661	0.0936	1.79e-42
rs62193695	2	231918203	T	A	0.164	cg27665808	2	232055229	0.67424	11.999	0.07411	1.58e-30	N	Adolescence	0.79971	14.8024	0.0692	3.38e-44
rs7908559	10	42607909	T	C	0.462	cg16633951	10	42971575	-0.51868	-11.9858	0.05054	1.81e-30	N	Childhood	-0.60619	-15.7354	0.05703	4.93e-49
rs10231454	7	64965305	T	G	0.458	cg12143784	7	64541923	0.54193	11.9687	0.02508	2.15e-30	N	Childhood	0.58829	14.6203	0.02215	2.97e-43
rs13411443	2	231918871	C	G	0.167	cg27665808	2	232055229	0.66587	11.9608	0.07458	2.33e-30	N	Adolescence	0.78673	14.679	0.07027	1.44e-43
rs7918771	10	42608215	A	T	0.459	cg16633951	10	42971575	-0.51386	-11.9341	0.05024	3.06e-30	N	Childhood	-0.60213	-15.7022	0.05694	7.39e-49
rs11672587	19	50352900	A	T	0.316	cg10751382	19	50391554	0.51708	11.9122	0.13011	3.82e-30	N	Adolescence	0.54806	12.7001	0.0627	6.47e-34
rs10269825	7	64739577	C	T	0.459	cg12143784	7	64541923	0.53097	11.898	0.0248	4.4e-30	N	Adolescence	0.63089	15.641	0.01857	1.48e-48
rs4717245	7	64757551	T	A	0.459	cg12143784	7	64541923	0.53097	11.898	0.0248	4.4e-30	N	Adolescence	0.63089	15.641	0.01857	1.48e-48
rs9638427	7	64762034	G	A	0.459	cg12143784	7	64541923	0.53097	11.898	0.0248	4.4e-30	N	Adolescence	0.63089	15.641	0.01857	1.48e-48
rs139916550	7	64771606	D	R	0.461	cg12143784	7	64541923	0.52964	11.8927	0.02493	4.65e-30	N	Adolescence	0.63502	15.8148	0.01866	1.79e-49
rs7074992	10	42619450	A	G	0.438	cg16633951	10	42971575	-0.52237	-11.8891	0.05102	4.82e-30	N	Adolescence	-0.55964	-13.3975	0.04966	3.23e-37
rs7074992	10	42619450	A	G	0.438	cg16633951	10	42971575	-0.52237	-11.8891	0.05102	4.82e-30	N	Childhood	-0.60293	-15.2474	0.05778	1.79e-46
rs2278836	19	50358183	A	C	0.312	cg10751382	19	50391554	0.51788	11.8847	0.12931	5.04e-30	N	Adolescence	0.54997	12.7055	0.0644	6.11e-34
rs9794218	10	42474871	T	G	0.461	cg16633951	10	42971575	-0.50941	-11.8779	0.04875	5.4e-30	N	Childhood	-0.57885	-15.0655	0.055	1.56e-45
rs147201097	7	64790039	D	R	0.462	cg12143784	7	64541923	0.52958	11.8744	0.02492	5.59e-30	N	Adolescence	0.63791	15.8856	0.0187	7.51e-50
rs147201097	7	64790039	D	R	0.462	cg12143784	7	64541923	0.52958	11.8744	0.02492	5.59e-30	N	Childhood	0.57186	14.4352	0.02199	2.56e-42
rs200091610	7	64790038	D	R	0.462	cg12143784	7	64541923	0.52958	11.8744	0.02492	5.59e-30	N	Adolescence	0.63791	15.8856	0.0187	7.51e-50
rs200091610	7	64790038	D	R	0.462	cg12143784	7	64541923	0.52958	11.8744	0.02492	5.59e-30	N	Childhood	0.57186	14.4352	0.02199	2.56e-42
rs200378263	7	64780391	D	R	0.462	cg12143784	7	64541923	0.52958	11.8744	0.02492	5.59e-30	N	Adolescence	0.63791	15.8856	0.0187	7.51e-50
rs200378263	7	64780391	D	R	0.462	cg12143784	7	64541923	0.52958	11.8744	0.02492	5.59e-30	N	Childhood	0.57186	14.4352	0.02199	2.56e-42
rs34656581	7	64780389	D	R	0.462	cg12143784	7	64541923	0.52958	11.8744	0.02492	5.59e-30	N	Adolescence	0.63791	15.8856	0.0187	7.51e-50
rs34656581	7	64780389	D	R	0.462	cg12143784	7	64541923	0.52958	11.8744	0.02492	5.59e-30	N	Childhood	0.57186	14.4352	0.02199	2.56e-42
rs62472191	7	64783013	C	T	0.462	cg12143784	7	64541923	0.52958	11.8744	0.02492	5.59e-30	N	Adolescence	0.63791	15.8856	0.0187	7.51e-50
rs62472191	7	64783013	C	T	0.462	cg12143784	7	64541923	0.52958	11.8744	0.02492	5.59e-30	N	Childhood	0.57186	14.4352	0.02199	2.56e-42
rs6963801	7	64782426	T	C	0.462	cg12143784	7	64541923	0.52958	11.8744	0.02492	5.59e-30	N	Adolescence	0.63791	15.8856	0.0187	7.51e-50
rs6963801	7	64782426	T	C	0.462	cg12143784	7	64541923	0.52958	11.8744	0.02492	5.59e-30	N	Childhood	0.57186	14.4352	0.02199	2.56e-42
rs7792389	7	64781867	T	C	0.462	cg12143784	7	64541923	0.52958	11.8744	0.02492	5.59e-30	N	Adolescence	0.63791	15.8856	0.0187	7.51e-50
rs7792389	7	64781867	T	C	0.462	cg12143784	7	64541923	0.52958	11.8744	0.02492	5.59e-30	N	Childhood	0.57186	14.4352	0.02199	2.56e-42
rs2335068	10	42427074	A	C	0.455	cg16633951	10	42971575	-0.51172	-11.8707	0.04937	5.8e-30	N	Childhood	-0.59506	-15.4164	0.05586	2.35e-47
rs1255401	10	42975170	T	C	0.328	cg16633951	10	42971575	0.52265	11.8693	0.04793	5.89e-30	N	Adolescence	0.54657	12.762	0.04673	3.34e-34
rs9702520	10	42512697	T	C	0.482	cg16633951	10	42971575	0.51377	11.8679	0.05248	5.98e-30	N	Adolescence	0.5259	12.5965	0.04617	1.96e-33
rs9702520	10	42512697	T	C	0.482	cg16633951	10	42971575	0.51377	11.8679	0.05248	5.98e-30	N	Childhood	0.56913	14.5803	0.0529	4.74e-43
rs11765030	7	64768219	C	T	0.46	cg12143784	7	64541923	0.52853	11.8568	0.02486	6.68e-30	N	Adolescence	0.63714	15.8741	0.01857	8.66e-50
rs11765030	7	64768219	C	T	0.46	cg12143784	7	64541923	0.52853	11.8568	0.02486	6.68e-30	N	Childhood	0.56925	14.3644	0.02195	5.82e-42
rs2915386	7	64967204	G	A	0.462	cg12143784	7	64541923	0.53417	11.8512	0.02518	7.07e-30	N	Childhood	0.59501	14.941	0.02208	6.85e-45
rs9663774	10	42517060	C	T	0.486	cg16633951	10	42971575	-0.50875	-11.8465	0.0491	7.42e-30	N	Childhood	-0.59008	-15.275	0.05546	1.28e-46
rs2900628	7	64721546	A	G	0.471	cg12143784	7	64541923	0.51677	11.8463	0.02324	7.43e-30	N	Adolescence	0.62258	15.8862	0.02052	7.46e-50
rs7796960	7	64767457	C	T	0.459	cg12143784	7	64541923	0.52954	11.8369	0.02486	8.17e-30	N	Adolescence	0.63378	15.7019	0.01869	7.08e-49
rs7796960	7	64767457	C	T	0.459	cg12143784	7	64541923	0.52954	11.8369	0.02486	8.17e-30	N	Childhood	0.5685	14.2849	0.02195	1.46e-41
rs143015660	10	42801627	G	C	0.448	cg16633951	10	42971575	-0.51789	-11.8309	0.05045	8.68e-30	N	Childhood	-0.5912	-15.0136	0.05531	2.9e-45
rs145645249	10	42807910	G	A	0.448	cg16633951	10	42971575	-0.51789	-11.8309	0.05045	8.68e-30	N	Childhood	-0.5912	-15.0136	0.05531	2.9e-45
rs28971522	10	42801633	C	A	0.448	cg16633951	10	42971575	-0.51789	-11.8309	0.05045	8.68e-30	N	Childhood	-0.5912	-15.0136	0.05531	2.9e-45
rs4519048	10	42818429	G	A	0.448	cg16633951	10	42971575	-0.51789	-11.8309	0.05045	8.68e-30	N	Childhood	-0.5912	-15.0136	0.05531	2.9e-45
rs60548508	10	42777789	G	A	0.448	cg16633951	10	42971575	-0.51789	-11.8309	0.05045	8.68e-30	N	Childhood	-0.5912	-15.0136	0.05531	2.9e-45
rs7073618	10	42778964	C	A	0.448	cg16633951	10	42971575	-0.51789	-11.8309	0.05045	8.68e-30	N	Childhood	-0.5912	-15.0136	0.05531	2.9e-45
rs77018243	10	42797521	I	R	0.448	cg16633951	10	42971575	-0.51789	-11.8309	0.05045	8.68e-30	N	Childhood	-0.5912	-15.0136	0.05531	2.9e-45
rs10273075	7	64768178	A	G	0.461	cg12143784	7	64541923	0.52824	11.8157	0.02486	1.01e-29	N	Adolescence	0.63619	15.7982	0.0188	2.19e-49
rs2505792	10	42812549	A	G	0.446	cg16633951	10	42971575	-0.51845	-11.8141	0.05063	1.03e-29	N	Childhood	-0.59496	-15.0942	0.05647	1.11e-45
rs11238831	10	42794377	A	G	0.445	cg16633951	10	42971575	-0.5178	-11.8119	0.05072	1.05e-29	N	Adolescence	-0.56101	-13.5151	0.05003	8.75e-38
rs11238883	10	42802585	T	C	0.445	cg16633951	10	42971575	-0.5178	-11.8119	0.05072	1.05e-29	N	Adolescence	-0.56101	-13.5151	0.05003	8.75e-38
rs2505815	10	42848748	T	C	0.445	cg16633951	10	42971575	-0.5178	-11.8119	0.05072	1.05e-29	N	Adolescence	-0.56101	-13.5151	0.05003	8.75e-38
rs3004226	10	42825913	C	T	0.445	cg16633951	10	42971575	-0.5178	-11.8119	0.05072	1.05e-29	N	Adolescence	-0.56101	-13.5151	0.05003	8.75e-38
rs58396160	10	42833132	D	R	0.445	cg16633951	10	42971575	-0.5178	-11.8119	0.05072	1.05e-29	N	Adolescence	-0.56101	-13.5151	0.05003	8.75e-38
rs10797137	10	42498727	C	A	0.47	cg04395798	10	42971732	-0.5062	-11.8041	0.03502	1.14e-29	N	Childhood	-0.54218	-13.1961	0.0364	3.06e-36
rs10908980	10	42508295	T	C	0.47	cg04395798	10	42971732	-0.5062	-11.8041	0.03502	1.14e-29	N	Childhood	-0.54218	-13.1961	0.0364	3.06e-36
rs10908982	10	42515428	T	G	0.47	cg04395798	10	42971732	-0.5062	-11.8041	0.03502	1.14e-29	N	Childhood	-0.54218	-13.1961	0.0364	3.06e-36
rs1589588	10	42467985	T	C	0.47	cg04395798	10	42971732	-0.5062	-11.8041	0.03502	1.14e-29	N	Childhood	-0.54218	-13.1961	0.0364	3.06e-36
rs1818808	10	42509918	T	C	0.47	cg04395798	10	42971732	-0.5062	-11.8041	0.03502	1.14e-29	N	Childhood	-0.54218	-13.1961	0.0364	3.06e-36
rs9665548	10	42447593	C	G	0.47	cg04395798	10	42971732	-0.5062	-11.8041	0.03502	1.14e-29	N	Childhood	-0.54218	-13.1961	0.0364	3.06e-36
rs9794047	10	42506274	A	C	0.47	cg04395798	10	42971732	-0.5062	-11.8041	0.03502	1.14e-29	N	Childhood	-0.54218	-13.1961	0.0364	3.06e-36
rs9794761	10	42497889	T	C	0.47	cg04395798	10	42971732	-0.5062	-11.8041	0.03502	1.14e-29	N	Childhood	-0.54218	-13.1961	0.0364	3.06e-36
rs6950484	7	64953463	A	C	0.465	cg12143784	7	64541923	0.5339	11.7991	0.02537	1.2e-29	N	Childhood	0.59935	15.0225	0.02239	2.61e-45
rs4239488	19	50405218	T	C	0.358	cg10751382	19	50391554	-0.50415	-11.7798	0.09874	1.45e-29	N	Adolescence	-0.50776	-11.8834	0.06817	3.36e-30
rs10793533	10	42810219	T	C	0.449	cg16633951	10	42971575	-0.51511	-11.7488	0.05039	1.98e-29	N	Adolescence	-0.561	-13.5268	0.04941	7.67e-38
rs11771033	7	64900821	T	C	0.44	cg12143784	7	64541923	0.52428	11.7167	0.02446	2.73e-29	N	Adolescence	0.62181	15.3285	0.02013	6.47e-47
rs11771033	7	64900821	T	C	0.44	cg12143784	7	64541923	0.52428	11.7167	0.02446	2.73e-29	N	Childhood	0.58572	14.8369	0.02186	2.34e-44
rs6606608	10	42782853	A	G	0.442	cg16633951	10	42971575	-0.51293	-11.702	0.05021	3.17e-29	N	Adolescence	-0.54753	-13.1433	0.04876	5.32e-36
rs7086623	10	42786973	G	A	0.442	cg16633951	10	42971575	-0.51293	-11.702	0.05021	3.17e-29	N	Adolescence	-0.54753	-13.1433	0.04876	5.32e-36
rs4514357	10	42682512	G	C	0.446	cg16633951	10	42971575	-0.51135	-11.7002	0.05036	3.22e-29	N	Adolescence	-0.55521	-13.396	0.0497	3.29e-37
rs4514357	10	42682512	G	C	0.446	cg16633951	10	42971575	-0.51135	-11.7002	0.05036	3.22e-29	N	Childhood	-0.58961	-14.9703	0.05579	4.84e-45
rs7090779	10	42783790	A	C	0.44	cg16633951	10	42971575	-0.51296	-11.6845	0.0509	3.77e-29	N	Adolescence	-0.54685	-13.1039	0.04939	8.19e-36
rs2954833	10	42778097	A	G	0.449	cg16633951	10	42971575	-0.51408	-11.6823	0.05036	3.85e-29	N	Adolescence	-0.55882	-13.4215	0.04957	2.48e-37
rs12622630	2	232152297	G	A	0.276	cg07929768	2	232055508	0.55066	11.668	0.02956	4.45e-29	N	Childhood	0.64094	15.2437	0.0764	1.87e-46
rs11239843	10	42682133	C	A	0.446	cg16633951	10	42971575	-0.51071	-11.668	0.05045	4.45e-29	N	Adolescence	-0.55574	-13.3956	0.04971	3.3e-37
rs13418542	2	232156837	T	C	0.276	cg07929768	2	232055508	0.55228	11.662	0.03251	4.72e-29	N	Childhood	0.63885	15.1187	0.0764	8.31e-46
rs13428268	2	232155641	G	T	0.276	cg07929768	2	232055508	0.55228	11.662	0.03251	4.72e-29	N	Childhood	0.63885	15.1187	0.0764	8.31e-46
rs3731781	2	232159243	G	A	0.276	cg07929768	2	232055508	0.55228	11.662	0.03251	4.72e-29	N	Childhood	0.63885	15.1187	0.0764	8.31e-46
rs62197352	2	232165233	G	C	0.276	cg07929768	2	232055508	0.55228	11.662	0.03251	4.72e-29	N	Childhood	0.63885	15.1187	0.0764	8.31e-46
rs76972515	10	42486831	A	G	0.477	cg16633951	10	42971575	-0.50339	-11.659	0.04968	4.87e-29	N	Adolescence	-0.5091	-12.2652	0.04596	6.46e-32
rs1255401	10	42975170	T	C	0.328	cg04395798	10	42971732	0.51377	11.6417	0.03974	5.78e-29	N	Adolescence	0.56106	13.0901	0.03979	9.53e-36
rs1589587	10	42512897	C	G	0.474	cg04395798	10	42971732	-0.49785	-11.6401	0.03471	5.87e-29	N	Childhood	-0.53341	-13.0134	0.03619	2.25e-35
rs2334905	10	42512030	G	A	0.474	cg04395798	10	42971732	-0.49785	-11.6401	0.03471	5.87e-29	N	Childhood	-0.53341	-13.0134	0.03619	2.25e-35
rs9665583	10	42610826	G	C	0.459	cg04395798	10	42971732	-0.5046	-11.6377	0.03471	6.02e-29	N	Childhood	-0.53485	-12.9038	0.0365	7.4e-35
rs62637067	10	42809526	C	T	0.455	cg16633951	10	42971575	-0.50605	-11.6101	0.04907	7.92e-29	N	Adolescence	-0.54068	-13.1021	0.049	8.36e-36
rs11238831	10	42794377	A	G	0.445	cg04395798	10	42971732	-0.50936	-11.5952	0.03493	9.19e-29	N	Adolescence	-0.48629	-11.3434	0.02895	7.74e-28
rs11238883	10	42802585	T	C	0.445	cg04395798	10	42971732	-0.50936	-11.5952	0.03493	9.19e-29	N	Adolescence	-0.48629	-11.3434	0.02895	7.74e-28
rs2505815	10	42848748	T	C	0.445	cg04395798	10	42971732	-0.50936	-11.5952	0.03493	9.19e-29	N	Adolescence	-0.48629	-11.3434	0.02895	7.74e-28
rs3004226	10	42825913	C	T	0.445	cg04395798	10	42971732	-0.50936	-11.5952	0.03493	9.19e-29	N	Adolescence	-0.48629	-11.3434	0.02895	7.74e-28
rs58396160	10	42833132	D	R	0.445	cg04395798	10	42971732	-0.50936	-11.5952	0.03493	9.19e-29	N	Adolescence	-0.48629	-11.3434	0.02895	7.74e-28
rs7260222	19	50354211	T	C	0.349	cg10751382	19	50391554	0.49469	11.5839	0.12593	1.03e-28	N	Adolescence	0.51885	12.2298	0.05573	9.36e-32
rs7260222	19	50354211	T	C	0.349	cg10751382	19	50391554	0.49469	11.5839	0.12593	1.03e-28	N	Childhood	0.54325	13.0449	0.09164	1.6e-35
rs147245510	2	232117819	I	R	0.339	cg27665808	2	232055229	0.53116	11.5751	0.06233	1.12e-28	N	Adolescence	0.62466	14.053	0.06605	2.02e-40
rs9973970	2	232097383	C	T	0.338	cg27665808	2	232055229	0.53054	11.5733	0.06163	1.14e-28	N	Adolescence	0.62888	14.1885	0.06605	4.28e-41
rs10198572	2	232096723	A	G	0.338	cg27665808	2	232055229	0.53069	11.5701	0.06171	1.18e-28	N	Adolescence	0.62963	14.2007	0.06605	3.72e-41
rs10423897	19	50357189	C	T	0.352	cg10751382	19	50391554	0.49232	11.5586	0.12573	1.32e-28	N	Adolescence	0.51648	12.2026	0.05624	1.24e-31
rs10423897	19	50357189	C	T	0.352	cg10751382	19	50391554	0.49232	11.5586	0.12573	1.32e-28	N	Childhood	0.55422	13.4076	0.09136	2.97e-37
rs11770224	7	64900721	A	G	0.442	cg12143784	7	64541923	0.51939	11.5589	0.02437	1.32e-28	N	Childhood	0.59225	14.9895	0.0219	3.86e-45
rs1808615	7	64900065	A	G	0.442	cg12143784	7	64541923	0.51939	11.5589	0.02437	1.32e-28	N	Childhood	0.59225	14.9895	0.0219	3.86e-45
rs2505792	10	42812549	A	G	0.446	cg04395798	10	42971732	-0.50825	-11.5508	0.03478	1.43e-28	N	Childhood	-0.53442	-12.658	0.03633	1.04e-33
rs13418346	2	232132374	A	G	0.339	cg27665808	2	232055229	0.52998	11.5448	0.06233	1.51e-28	N	Adolescence	0.62355	14.0222	0.06605	2.87e-40
rs1255389	10	43026647	C	T	0.362	cg16633951	10	42971575	0.49554	11.5385	0.05327	1.61e-28	N	Adolescence	0.52742	12.6197	0.04307	1.53e-33
rs4398787	7	64955342	C	T	0.474	cg12143784	7	64541923	0.51552	11.5334	0.02493	1.7e-28	N	Childhood	0.57136	14.4345	0.02118	2.59e-42
rs4293079	10	42782446	A	G	0.443	cg16633951	10	42971575	-0.50689	-11.5256	0.0503	1.83e-28	N	Adolescence	-0.54991	-13.1972	0.04939	2.95e-36
rs9664345	10	42465390	C	G	0.476	cg04395798	10	42971732	-0.49398	-11.5215	0.03471	1.91e-28	N	Childhood	-0.52953	-12.9085	0.03619	7.04e-35
rs9665333	10	42605591	T	A	0.46	cg04395798	10	42971732	-0.49923	-11.5138	0.03467	2.06e-28	N	Childhood	-0.5318	-12.8383	0.03666	1.5e-34
rs7090779	10	42783790	A	C	0.44	cg04395798	10	42971732	-0.50554	-11.496	0.03492	2.46e-28	N	Adolescence	-0.4799	-11.1727	0.02862	4.16e-27
rs9422470	10	42931825	T	C	0.36	cg04395798	10	42971732	0.4978	11.489	0.03765	2.63e-28	N	Adolescence	0.50436	11.7958	0.03377	8.22e-30
rs11897387	2	232122576	C	T	0.341	cg27665808	2	232055229	0.52861	11.4809	0.06163	2.85e-28	N	Adolescence	0.62784	14.1055	0.06648	1.11e-40
rs143015660	10	42801627	G	C	0.448	cg04395798	10	42971732	-0.50428	-11.4757	0.03467	3e-28	N	Childhood	-0.52955	-12.5529	0.03613	3.18e-33
rs145645249	10	42807910	G	A	0.448	cg04395798	10	42971732	-0.50428	-11.4757	0.03467	3e-28	N	Childhood	-0.52955	-12.5529	0.03613	3.18e-33
rs28971522	10	42801633	C	A	0.448	cg04395798	10	42971732	-0.50428	-11.4757	0.03467	3e-28	N	Childhood	-0.52955	-12.5529	0.03613	3.18e-33
rs4519048	10	42818429	G	A	0.448	cg04395798	10	42971732	-0.50428	-11.4757	0.03467	3e-28	N	Childhood	-0.52955	-12.5529	0.03613	3.18e-33
rs60548508	10	42777789	G	A	0.448	cg04395798	10	42971732	-0.50428	-11.4757	0.03467	3e-28	N	Childhood	-0.52955	-12.5529	0.03613	3.18e-33
rs7073618	10	42778964	C	A	0.448	cg04395798	10	42971732	-0.50428	-11.4757	0.03467	3e-28	N	Childhood	-0.52955	-12.5529	0.03613	3.18e-33
rs77018243	10	42797521	I	R	0.448	cg04395798	10	42971732	-0.50428	-11.4757	0.03467	3e-28	N	Childhood	-0.52955	-12.5529	0.03613	3.18e-33
rs2954825	10	42836158	C	G	0.408	cg16633951	10	42971575	-0.49786	-11.4689	0.04669	3.21e-28	N	Adolescence	-0.53728	-12.9911	0.04806	2.8e-35
rs2954825	10	42836158	C	G	0.408	cg16633951	10	42971575	-0.49786	-11.4689	0.04669	3.21e-28	N	Childhood	-0.55978	-14.2285	0.05445	2.79e-41
rs1255369	10	42984386	T	G	0.351	cg16633951	10	42971575	0.49469	11.4522	0.05268	3.79e-28	N	Adolescence	0.52461	12.4901	0.04271	6.06e-33
rs10908981	10	42514721	A	T	0.42	cg16633951	10	42971575	-0.48297	-11.4412	0.04513	4.22e-28	N	Childhood	-0.55752	-14.5007	0.05278	1.2e-42
rs9702482	10	42460509	G	T	0.421	cg16633951	10	42971575	-0.48209	-11.4396	0.04497	4.28e-28	N	Childhood	-0.55458	-14.4339	0.05231	2.6e-42
rs9702870	10	42460511	C	A	0.421	cg16633951	10	42971575	-0.48209	-11.4396	0.04497	4.28e-28	N	Childhood	-0.55458	-14.4339	0.05231	2.6e-42
rs9702520	10	42512697	T	C	0.482	cg04395798	10	42971732	0.49744	11.4351	0.03743	4.48e-28	N	Adolescence	0.47607	11.1481	0.02903	5.29e-27
rs9702520	10	42512697	T	C	0.482	cg04395798	10	42971732	0.49744	11.4351	0.03743	4.48e-28	N	Childhood	0.5255	12.6607	0.03798	1.01e-33
rs7604042	2	232135541	T	A	0.336	cg27665808	2	232055229	0.52456	11.4342	0.06134	4.52e-28	N	Adolescence	0.61581	13.842	0.06545	2.22e-39
rs4718243	7	64916217	A	G	0.442	cg12143784	7	64541923	0.51515	11.434	0.02441	4.53e-28	N	Adolescence	0.62626	15.4101	0.02019	2.42e-47
rs4718243	7	64916217	A	G	0.442	cg12143784	7	64541923	0.51515	11.434	0.02441	4.53e-28	N	Childhood	0.59225	14.9895	0.0219	3.86e-45
rs4718244	7	64916237	G	A	0.442	cg12143784	7	64541923	0.51515	11.434	0.02441	4.53e-28	N	Adolescence	0.62626	15.4101	0.02019	2.42e-47
rs4718244	7	64916237	G	A	0.442	cg12143784	7	64541923	0.51515	11.434	0.02441	4.53e-28	N	Childhood	0.59225	14.9895	0.0219	3.86e-45
rs6958699	7	64916372	G	A	0.442	cg12143784	7	64541923	0.51515	11.434	0.02441	4.53e-28	N	Adolescence	0.62626	15.4101	0.02019	2.42e-47
rs6958699	7	64916372	G	A	0.442	cg12143784	7	64541923	0.51515	11.434	0.02441	4.53e-28	N	Childhood	0.59225	14.9895	0.0219	3.86e-45
rs4514357	10	42682512	G	C	0.446	cg04395798	10	42971732	-0.50071	-11.4247	0.03452	4.96e-28	N	Adolescence	-0.48429	-11.33	0.02869	8.83e-28
rs4514357	10	42682512	G	C	0.446	cg04395798	10	42971732	-0.50071	-11.4247	0.03452	4.96e-28	N	Childhood	-0.53365	-12.6748	0.03651	8.68e-34
rs11239114	10	42839105	G	A	0.413	cg16633951	10	42971575	-0.49389	-11.4242	0.0463	4.99e-28	N	Childhood	-0.54734	-13.9298	0.05139	8.48e-40
rs12411871	10	42839095	C	A	0.413	cg16633951	10	42971575	-0.49389	-11.4242	0.0463	4.99e-28	N	Childhood	-0.54734	-13.9298	0.05139	8.48e-40
rs2466475	10	42856143	C	A	0.413	cg16633951	10	42971575	-0.49389	-11.4242	0.0463	4.99e-28	N	Childhood	-0.54734	-13.9298	0.05139	8.48e-40
rs2466481	10	42859628	G	A	0.413	cg16633951	10	42971575	-0.49389	-11.4242	0.0463	4.99e-28	N	Childhood	-0.54734	-13.9298	0.05139	8.48e-40
rs2489684	10	42862079	C	T	0.413	cg16633951	10	42971575	-0.49389	-11.4242	0.0463	4.99e-28	N	Childhood	-0.54734	-13.9298	0.05139	8.48e-40
rs2505803	10	42864101	C	A	0.413	cg16633951	10	42971575	-0.49389	-11.4242	0.0463	4.99e-28	N	Childhood	-0.54734	-13.9298	0.05139	8.48e-40
rs2505828	10	42836627	A	G	0.413	cg16633951	10	42971575	-0.49389	-11.4242	0.0463	4.99e-28	N	Childhood	-0.54734	-13.9298	0.05139	8.48e-40
rs2505838	10	42827951	A	G	0.413	cg16633951	10	42971575	-0.49389	-11.4242	0.0463	4.99e-28	N	Childhood	-0.54734	-13.9298	0.05139	8.48e-40
rs2466466	10	42832578	T	G	0.408	cg16633951	10	42971575	-0.49688	-11.4176	0.0462	5.32e-28	N	Adolescence	-0.54025	-13.0898	0.04832	9.57e-36
rs2466466	10	42832578	T	G	0.408	cg16633951	10	42971575	-0.49688	-11.4176	0.0462	5.32e-28	N	Childhood	-0.54971	-13.9255	0.05196	8.9e-40
rs1818811	10	42509506	G	C	0.423	cg16633951	10	42971575	-0.48208	-11.4143	0.04516	5.49e-28	N	Childhood	-0.55423	-14.422	0.05304	2.99e-42
rs10793533	10	42810219	T	C	0.449	cg04395798	10	42971732	-0.50181	-11.4031	0.03478	6.13e-28	N	Adolescence	-0.48386	-11.2874	0.02903	1.34e-27
rs10909011	10	42436301	G	A	0.462	cg04395798	10	42971732	-0.4952	-11.3803	0.03468	7.67e-28	N	Childhood	-0.52669	-12.6665	0.03652	9.49e-34
rs11265994	10	42477634	T	C	0.462	cg04395798	10	42971732	-0.4952	-11.3803	0.03468	7.67e-28	N	Childhood	-0.52669	-12.6665	0.03652	9.49e-34
rs1608197	10	42497519	A	G	0.462	cg04395798	10	42971732	-0.4952	-11.3803	0.03468	7.67e-28	N	Childhood	-0.52669	-12.6665	0.03652	9.49e-34
rs9664628	10	42469340	G	C	0.462	cg04395798	10	42971732	-0.4952	-11.3803	0.03468	7.67e-28	N	Childhood	-0.52669	-12.6665	0.03652	9.49e-34
rs11239843	10	42682133	C	A	0.446	cg04395798	10	42971732	-0.49955	-11.3793	0.03467	7.75e-28	N	Adolescence	-0.48463	-11.3266	0.02871	9.14e-28
rs2954833	10	42778097	A	G	0.449	cg04395798	10	42971732	-0.50231	-11.379	0.03418	7.77e-28	N	Adolescence	-0.48109	-11.1805	0.02871	3.85e-27
rs6606608	10	42782853	A	G	0.442	cg04395798	10	42971732	-0.50035	-11.3756	0.03465	8.03e-28	N	Adolescence	-0.47453	-11.045	0.02852	1.44e-26
rs7086623	10	42786973	G	A	0.442	cg04395798	10	42971732	-0.50035	-11.3756	0.03465	8.03e-28	N	Adolescence	-0.47453	-11.045	0.02852	1.44e-26
rs3810268	19	50379193	T	C	0.422	cg11625877	19	50391885	0.49679	11.374	0.11367	8.17e-28	N	Childhood	0.33374	8.15936	0.03776	1.24e-15
rs8110265	19	50377835	A	G	0.422	cg11625877	19	50391885	0.49679	11.374	0.11367	8.17e-28	N	Childhood	0.33374	8.15936	0.03776	1.24e-15
rs11266147	10	42412787	T	G	0.47	cg16633951	10	42971575	0.48618	11.3735	0.05268	8.2e-28	N	Adolescence	0.4881	11.8776	0.04446	3.57e-30
rs11083985	19	50378143	C	T	0.421	cg11625877	19	50391885	0.49734	11.3529	0.11308	1e-27	N	Childhood	0.33786	8.24704	0.0379	6.31e-16
rs2290775	19	50375242	T	C	0.421	cg11625877	19	50391885	0.49734	11.3529	0.11308	1e-27	N	Childhood	0.33786	8.24704	0.0379	6.31e-16
rs731826	19	50380858	G	T	0.421	cg11625877	19	50391885	0.49734	11.3529	0.11308	1e-27	N	Childhood	0.33786	8.24704	0.0379	6.31e-16
rs57449421	7	64415262	G	T	0.486	cg12143784	7	64541923	-0.48802	-11.3406	0.0221	1.13e-27	N	Childhood	-0.4585	-11.6468	0.01908	3.79e-29
rs202092097	10	42774684	D	R	0.436	cg16633951	10	42971575	-0.50292	-11.3376	0.04797	1.17e-27	N	Adolescence	-0.54116	-12.9092	0.0479	6.82e-35
rs10169827	2	232049722	G	A	0.316	cg27665808	2	232055229	0.52375	11.3374	0.05934	1.17e-27	N	Adolescence	0.60378	13.3127	0.05907	8.26e-37
rs10179264	2	232050603	C	G	0.316	cg27665808	2	232055229	0.52375	11.3374	0.05934	1.17e-27	N	Adolescence	0.60378	13.3127	0.05907	8.26e-37
rs10202608	2	232050653	G	A	0.316	cg27665808	2	232055229	0.52375	11.3374	0.05934	1.17e-27	N	Adolescence	0.60378	13.3127	0.05907	8.26e-37
rs10202782	2	232050796	G	A	0.316	cg27665808	2	232055229	0.52375	11.3374	0.05934	1.17e-27	N	Adolescence	0.60378	13.3127	0.05907	8.26e-37
rs10202806	2	232050852	G	A	0.316	cg27665808	2	232055229	0.52375	11.3374	0.05934	1.17e-27	N	Adolescence	0.60378	13.3127	0.05907	8.26e-37
rs10206322	2	232050072	C	T	0.316	cg27665808	2	232055229	0.52375	11.3374	0.05934	1.17e-27	N	Adolescence	0.60378	13.3127	0.05907	8.26e-37
rs6727962	2	232045268	A	G	0.316	cg27665808	2	232055229	0.52375	11.3374	0.05934	1.17e-27	N	Adolescence	0.60378	13.3127	0.05907	8.26e-37
rs6755467	2	232044684	C	A	0.316	cg27665808	2	232055229	0.52375	11.3374	0.05934	1.17e-27	N	Adolescence	0.60378	13.3127	0.05907	8.26e-37
rs1255376	10	42995069	T	G	0.35	cg16633951	10	42971575	0.49098	11.3309	0.05262	1.25e-27	N	Adolescence	0.52214	12.3986	0.04224	1.59e-32
rs2335065	10	42427405	T	G	0.413	cg16633951	10	42971575	-0.48252	-11.3253	0.04485	1.32e-27	N	Childhood	-0.55226	-14.2543	0.05272	2.08e-41
rs7074992	10	42619450	A	G	0.438	cg04395798	10	42971732	-0.50046	-11.315	0.03366	1.45e-27	N	Adolescence	-0.48722	-11.3062	0.02894	1.12e-27
rs7074992	10	42619450	A	G	0.438	cg04395798	10	42971732	-0.50046	-11.315	0.03366	1.45e-27	N	Childhood	-0.53615	-12.6255	0.03674	1.47e-33
rs12355221	10	42443348	T	C	0.47	cg04395798	10	42971732	-0.49019	-11.3114	0.03445	1.51e-27	N	Childhood	-0.51489	-12.4052	0.0361	1.52e-32
rs2505832	10	42820806	T	C	0.415	cg16633951	10	42971575	-0.48815	-11.3049	0.04513	1.61e-27	N	Adolescence	-0.53016	-12.904	0.04737	7.21e-35
rs2505832	10	42820806	T	C	0.415	cg16633951	10	42971575	-0.48815	-11.3049	0.04513	1.61e-27	N	Childhood	-0.54419	-13.8742	0.05046	1.59e-39
rs11266169	10	42436765	G	T	0.472	cg16633951	10	42971575	0.48209	11.3004	0.05199	1.68e-27	N	Childhood	0.55356	14.3967	0.05327	4.01e-42
rs11266155	10	42422535	C	G	0.462	cg04395798	10	42971732	-0.48942	-11.297	0.03451	1.74e-27	N	Childhood	-0.51978	-12.5576	0.03672	3.03e-33
rs1608194	10	42471859	A	G	0.463	cg04395798	10	42971732	-0.49129	-11.2963	0.03464	1.75e-27	N	Childhood	-0.52266	-12.5726	0.03641	2.58e-33
rs1255404	10	42978025	T	G	0.427	cg16633951	10	42971575	0.4802	11.2878	0.04463	1.9e-27	N	Adolescence	0.47906	11.5404	0.04066	1.09e-28
rs143538253	10	42437833	C	A	0.463	cg04395798	10	42971732	-0.49077	-11.2822	0.03464	2e-27	N	Childhood	-0.52301	-12.5827	0.03641	2.32e-33
rs9703868	10	42523670	A	C	0.412	cg16633951	10	42971575	-0.48179	-11.2821	0.04458	2.01e-27	N	Childhood	-0.553	-14.2488	0.05284	2.21e-41
rs2335057	10	42445690	T	G	0.448	cg16633951	10	42971575	0.4851	11.2764	0.05454	2.12e-27	N	Adolescence	0.49127	11.9057	0.04439	2.68e-30
rs1304263	10	42481742	G	T	0.416	cg16633951	10	42971575	-0.47849	-11.2727	0.04418	2.2e-27	N	Childhood	-0.54553	-14.1259	0.05223	9.06e-41
rs58562345	7	64415252	A	G	0.488	cg12143784	7	64541923	-0.48458	-11.2669	0.02213	2.33e-27	N	Childhood	-0.45947	-11.6943	0.01912	2.34e-29
rs189869033	10	42440313	C	T	0.464	cg04395798	10	42971732	-0.49073	-11.2507	0.03467	2.72e-27	N	Childhood	-0.52259	-12.5614	0.03652	2.91e-33
rs4046203	10	42464488	C	T	0.499	cg16633951	10	42971575	-0.48597	-11.2387	0.04702	3.06e-27	N	Childhood	-0.55204	-14.0687	0.05201	1.74e-40
rs10430806	10	42522198	T	C	0.468	cg04395798	10	42971732	-0.48732	-11.2251	0.0343	3.49e-27	N	Childhood	-0.51741	-12.4876	0.03618	6.36e-33
rs12775714	10	42468995	G	A	0.495	cg16633951	10	42971575	-0.48737	-11.2228	0.04746	3.57e-27	N	Childhood	-0.55355	-14.0482	0.05266	2.2e-40
rs1851486	10	42466083	C	G	0.495	cg16633951	10	42971575	-0.48737	-11.2228	0.04746	3.57e-27	N	Childhood	-0.55355	-14.0482	0.05266	2.2e-40
rs1851487	10	42465910	G	T	0.495	cg16633951	10	42971575	-0.48737	-11.2228	0.04746	3.57e-27	N	Childhood	-0.55355	-14.0482	0.05266	2.2e-40
rs2173464	10	42454325	A	G	0.495	cg16633951	10	42971575	-0.48737	-11.2228	0.04746	3.57e-27	N	Childhood	-0.55355	-14.0482	0.05266	2.2e-40
rs2334908	10	42464851	G	A	0.495	cg16633951	10	42971575	-0.48737	-11.2228	0.04746	3.57e-27	N	Childhood	-0.55355	-14.0482	0.05266	2.2e-40
rs9663767	10	42465110	G	A	0.495	cg16633951	10	42971575	-0.48737	-11.2228	0.04746	3.57e-27	N	Childhood	-0.55355	-14.0482	0.05266	2.2e-40
rs9664992	10	42465706	T	A	0.495	cg16633951	10	42971575	-0.48737	-11.2228	0.04746	3.57e-27	N	Childhood	-0.55355	-14.0482	0.05266	2.2e-40
rs139649430	10	42427814	D	R	0.469	cg04395798	10	42971732	-0.48668	-11.2126	0.03448	3.94e-27	N	Childhood	-0.51615	-12.4568	0.03619	8.8e-33
rs9664985	10	42428682	G	A	0.469	cg04395798	10	42971732	-0.48668	-11.2126	0.03448	3.94e-27	N	Childhood	-0.51615	-12.4568	0.03619	8.8e-33
rs9794187	10	42417591	A	G	0.466	cg16633951	10	42971575	0.48067	11.2106	0.05299	4.02e-27	N	Adolescence	0.48195	11.7063	0.04474	2.04e-29
rs2334910	10	42429369	T	A	0.414	cg16633951	10	42971575	-0.47786	-11.2097	0.04466	4.06e-27	N	Childhood	-0.54823	-14.1407	0.05261	7.65e-41
rs2505799	10	42856194	G	T	0.394	cg16633951	10	42971575	-0.49755	-11.2088	0.04384	4.09e-27	N	Childhood	-0.54216	-13.4381	0.05088	2.12e-37
rs1916121	10	42504463	T	A	0.418	cg16633951	10	42971575	-0.47573	-11.2082	0.04457	4.12e-27	N	Childhood	-0.5535	-14.327	0.05174	8.97e-42
rs7908559	10	42607909	T	C	0.462	cg04395798	10	42971732	-0.48942	-11.205	0.03469	4.25e-27	N	Childhood	-0.53059	-12.7564	0.03655	3.62e-34
rs62637067	10	42809526	C	T	0.455	cg04395798	10	42971732	-0.49044	-11.2021	0.03431	4.37e-27	N	Adolescence	-0.47752	-11.2534	0.02868	1.88e-27
rs2505811	10	42872833	C	G	0.414	cg16633951	10	42971575	-0.48041	-11.1998	0.04457	4.47e-27	N	Adolescence	-0.52406	-12.8491	0.0466	1.31e-34
rs9732766	10	42489708	T	C	0.463	cg04395798	10	42971732	-0.48741	-11.1923	0.03468	4.8e-27	N	Childhood	-0.52182	-12.5486	0.03641	3.33e-33
rs151072462	10	42487558	A	C	0.436	cg16633951	10	42971575	-0.47189	-11.1842	0.04482	5.2e-27	N	Adolescence	-0.47391	-11.4863	0.04306	1.87e-28
rs12269267	10	42434410	A	G	0.464	cg04395798	10	42971732	-0.48672	-11.1792	0.03475	5.46e-27	N	Childhood	-0.52049	-12.5166	0.03632	4.67e-33
rs1044167	19	50414717	T	C	0.306	cg10751382	19	50391554	-0.50628	-11.179	0.09375	5.47e-27	N	Adolescence	-0.51749	-11.5853	0.06308	6.92e-29
rs12623587	2	232160554	A	C	0.303	cg07929768	2	232055508	0.52173	11.1741	0.03014	5.73e-27	N	Adolescence	0.67857	17.1809	0.07237	7.01e-57
rs1818811	10	42509506	G	C	0.423	cg04395798	10	42971732	-0.47287	-11.1699	0.0329	5.97e-27	N	Childhood	-0.48832	-11.857	0.03378	4.48e-30
rs4293079	10	42782446	A	G	0.443	cg04395798	10	42971732	-0.49282	-11.1625	0.03448	6.41e-27	N	Adolescence	-0.46353	-10.7414	0.02803	2.68e-25
rs9663774	10	42517060	C	T	0.486	cg04395798	10	42971732	-0.48322	-11.1624	0.03467	6.42e-27	N	Childhood	-0.52259	-12.5856	0.03617	2.25e-33
rs55782278	2	232154412	A	G	0.303	cg07929768	2	232055508	0.52122	11.1612	0.0301	6.49e-27	N	Adolescence	0.6725	16.974	0.07233	9.69e-56
rs7918771	10	42608215	A	T	0.459	cg04395798	10	42971732	-0.48476	-11.1548	0.03471	6.91e-27	N	Childhood	-0.52699	-12.73	0.03655	4.81e-34
rs3731779	2	232158885	T	C	0.304	cg07929768	2	232055508	0.52104	11.1529	0.03012	7.04e-27	N	Adolescence	0.67413	17.0222	0.07235	5.27e-56
rs9663448	10	42444488	T	G	0.412	cg16633951	10	42971575	-0.47684	-11.1474	0.04427	7.42e-27	N	Childhood	-0.54985	-14.1481	0.0527	7.03e-41
rs2290774	19	50375035	C	T	0.438	cg11625877	19	50391885	0.49233	11.1356	0.1124	8.32e-27	N	Childhood	0.32622	7.85694	0.03876	1.21e-14
rs1589585	10	42514323	G	A	0.418	cg16633951	10	42971575	-0.4706	-11.1341	0.04427	8.44e-27	N	Childhood	-0.54634	-14.1811	0.05128	4.81e-41
rs115277592	7	64970467	T	C	0.489	cg12143784	7	64541923	-0.49697	-11.1226	0.02378	9.44e-27	N	Childhood	-0.54162	-13.5995	0.02011	3.51e-38
rs116809535	7	64970341	T	G	0.489	cg12143784	7	64541923	-0.49697	-11.1226	0.02378	9.44e-27	N	Childhood	-0.54162	-13.5995	0.02011	3.51e-38
rs117463285	7	64969316	T	C	0.489	cg12143784	7	64541923	-0.49697	-11.1226	0.02378	9.44e-27	N	Childhood	-0.54162	-13.5995	0.02011	3.51e-38
rs6968830	7	64953489	A	C	0.489	cg12143784	7	64541923	-0.49697	-11.1226	0.02378	9.44e-27	N	Childhood	-0.54162	-13.5995	0.02011	3.51e-38
rs10909022	10	42454909	T	C	0.497	cg16633951	10	42971575	-0.48291	-11.1216	0.04679	9.52e-27	N	Childhood	-0.55167	-14.0125	0.05257	3.31e-40
rs150848131	7	64948115	C	G	0.487	cg12143784	7	64541923	-0.49676	-11.1138	0.02366	1.03e-26	N	Childhood	-0.53573	-13.416	0.02008	2.71e-37
rs4486580	10	42618584	T	C	0.452	cg16633951	10	42971575	0.47346	11.1109	0.05038	1.06e-26	N	Childhood	0.54842	14.2744	0.05282	1.65e-41
rs10909013	10	42436914	T	C	0.414	cg16633951	10	42971575	-0.47397	-11.1039	0.04418	1.13e-26	N	Childhood	-0.54604	-14.0706	0.0528	1.71e-40
rs11266168	10	42436486	T	C	0.414	cg16633951	10	42971575	-0.47397	-11.1039	0.04418	1.13e-26	N	Childhood	-0.54604	-14.0706	0.0528	1.71e-40
rs148049723	7	64947544	T	C	0.477	cg12143784	7	64541923	-0.49299	-11.1022	0.02355	1.15e-26	N	Childhood	-0.52593	-13.2449	0.01949	1.79e-36
rs4580930	7	64945709	C	T	0.477	cg12143784	7	64541923	-0.49299	-11.1022	0.02355	1.15e-26	N	Childhood	-0.52593	-13.2449	0.01949	1.79e-36
rs62129183	19	50303613	C	G	0.166	cg10751382	19	50391554	0.6221	11.0927	0.1487	1.26e-26	N	Adolescence	0.5548	9.78123	0.05395	1.83e-21
rs1851490	10	42456692	G	C	0.47	cg04395798	10	42971732	-0.48098	-11.0798	0.0339	1.42e-26	N	Childhood	-0.51144	-12.3426	0.03606	2.93e-32
rs75478119	19	50358133	G	T	0.329	cg10751382	19	50391554	0.48735	11.0491	0.12314	1.91e-26	N	Adolescence	0.52936	12.2033	0.05573	1.23e-31
rs9422470	10	42931825	T	C	0.36	cg16633951	10	42971575	0.48154	11.0435	0.04994	2.02e-26	N	Adolescence	0.47879	11.1706	0.04029	4.24e-27
rs10908961	10	42469894	A	G	0.468	cg04395798	10	42971732	-0.47964	-11.0397	0.0343	2.1e-26	N	Adolescence	-0.47329	-11.2678	0.02805	1.63e-27
rs9665476	10	42492751	A	T	0.468	cg04395798	10	42971732	-0.47964	-11.0397	0.0343	2.1e-26	N	Adolescence	-0.47329	-11.2678	0.02805	1.63e-27
rs11239114	10	42839105	G	A	0.413	cg04395798	10	42971732	-0.4792	-11.0391	0.03168	2.11e-26	N	Childhood	-0.48737	-11.6187	0.03353	5.03e-29
rs12411871	10	42839095	C	A	0.413	cg04395798	10	42971732	-0.4792	-11.0391	0.03168	2.11e-26	N	Childhood	-0.48737	-11.6187	0.03353	5.03e-29
rs2466475	10	42856143	C	A	0.413	cg04395798	10	42971732	-0.4792	-11.0391	0.03168	2.11e-26	N	Childhood	-0.48737	-11.6187	0.03353	5.03e-29
rs2466481	10	42859628	G	A	0.413	cg04395798	10	42971732	-0.4792	-11.0391	0.03168	2.11e-26	N	Childhood	-0.48737	-11.6187	0.03353	5.03e-29
rs2489684	10	42862079	C	T	0.413	cg04395798	10	42971732	-0.4792	-11.0391	0.03168	2.11e-26	N	Childhood	-0.48737	-11.6187	0.03353	5.03e-29
rs2505803	10	42864101	C	A	0.413	cg04395798	10	42971732	-0.4792	-11.0391	0.03168	2.11e-26	N	Childhood	-0.48737	-11.6187	0.03353	5.03e-29
rs2505828	10	42836627	A	G	0.413	cg04395798	10	42971732	-0.4792	-11.0391	0.03168	2.11e-26	N	Childhood	-0.48737	-11.6187	0.03353	5.03e-29
rs2505838	10	42827951	A	G	0.413	cg04395798	10	42971732	-0.4792	-11.0391	0.03168	2.11e-26	N	Childhood	-0.48737	-11.6187	0.03353	5.03e-29
rs10909021	10	42454677	T	C	0.484	cg16633951	10	42971575	0.48415	11.0378	0.04634	2.13e-26	N	Adolescence	0.48379	11.5401	0.04318	1.09e-28
rs2466466	10	42832578	T	G	0.408	cg04395798	10	42971732	-0.48147	-11.016	0.03138	2.63e-26	N	Adolescence	-0.4841	-11.4326	0.02813	3.19e-28
rs2466466	10	42832578	T	G	0.408	cg04395798	10	42971732	-0.48147	-11.016	0.03138	2.63e-26	N	Childhood	-0.49238	-11.6954	0.03232	2.32e-29
rs2954825	10	42836158	C	G	0.408	cg04395798	10	42971732	-0.47921	-10.9795	0.0322	3.73e-26	N	Adolescence	-0.47803	-11.2572	0.02862	1.81e-27
rs2954825	10	42836158	C	G	0.408	cg04395798	10	42971732	-0.47921	-10.9795	0.0322	3.73e-26	N	Childhood	-0.49191	-11.6719	0.0336	2.94e-29
rs10214965	7	64738517	T	C	0.496	cg12143784	7	64541923	0.48833	10.9742	0.02288	3.93e-26	N	Adolescence	0.5833	14.4513	0.01825	2.05e-42
rs10214971	7	64738754	T	C	0.496	cg12143784	7	64541923	0.48833	10.9742	0.02288	3.93e-26	N	Adolescence	0.5833	14.4513	0.01825	2.05e-42
rs10231956	7	64762394	G	A	0.496	cg12143784	7	64541923	0.48833	10.9742	0.02288	3.93e-26	N	Adolescence	0.5833	14.4513	0.01825	2.05e-42
rs3846968	7	64733634	G	C	0.496	cg12143784	7	64541923	0.48833	10.9742	0.02288	3.93e-26	N	Adolescence	0.5833	14.4513	0.01825	2.05e-42
rs3846969	7	64733683	G	A	0.496	cg12143784	7	64541923	0.48833	10.9742	0.02288	3.93e-26	N	Adolescence	0.5833	14.4513	0.01825	2.05e-42
rs9664608	10	42615543	G	T	0.494	cg16633951	10	42971575	0.4781	10.9742	0.05123	3.93e-26	N	Adolescence	0.50001	12.0165	0.04641	8.56e-31
rs9794218	10	42474871	T	G	0.461	cg04395798	10	42971732	-0.47464	-10.9448	0.03227	5.2e-26	N	Childhood	-0.50383	-12.1726	0.03515	1.73e-31
rs6437001	2	232013304	T	G	0.312	cg27665808	2	232055229	0.50808	10.9337	0.05738	5.79e-26	N	Adolescence	0.60199	13.2539	0.06185	1.58e-36
rs58557553	10	42491288	I	R	0.469	cg04395798	10	42971732	-0.47582	-10.9232	0.03415	6.39e-26	N	Childhood	-0.51091	-12.3071	0.03608	4.25e-32
rs10900295	10	42691595	T	C	0.483	cg04395798	10	42971732	0.47103	10.9198	0.03386	6.6e-26	N	Adolescence	0.45389	10.8099	0.02843	1.39e-25
rs10564756	2	232042278	D	R	0.312	cg27665808	2	232055229	0.50734	10.9153	0.05738	6.89e-26	N	Adolescence	0.59994	13.1993	0.06158	2.88e-36
rs2303349	2	232030861	G	A	0.312	cg27665808	2	232055229	0.50734	10.9153	0.05738	6.89e-26	N	Adolescence	0.59994	13.1993	0.06158	2.88e-36
rs6437003	2	232030301	T	C	0.312	cg27665808	2	232055229	0.50734	10.9153	0.05738	6.89e-26	N	Adolescence	0.59994	13.1993	0.06158	2.88e-36
rs1255389	10	43026647	C	T	0.362	cg04395798	10	42971732	0.47205	10.9137	0.03795	7e-26	N	Adolescence	0.54341	13.0008	0.03436	2.52e-35
rs9691584	7	64958538	C	T	0.488	cg12143784	7	64541923	-0.48892	-10.9128	0.0233	7.06e-26	N	Childhood	-0.53324	-13.3421	0.01988	6.13e-37
rs1025107	2	232034342	T	C	0.313	cg27665808	2	232055229	0.50732	10.91	0.05746	7.25e-26	N	Adolescence	0.60051	13.2086	0.06172	2.6e-36
rs2032953	2	232035793	T	C	0.313	cg27665808	2	232055229	0.50732	10.91	0.05746	7.25e-26	N	Adolescence	0.60051	13.2086	0.06172	2.6e-36
rs2303350	2	232030555	A	G	0.313	cg27665808	2	232055229	0.50732	10.91	0.05746	7.25e-26	N	Adolescence	0.60051	13.2086	0.06172	2.6e-36
rs2303351	2	232030510	A	C	0.313	cg27665808	2	232055229	0.50732	10.91	0.05746	7.25e-26	N	Adolescence	0.60051	13.2086	0.06172	2.6e-36
rs6749	2	232035429	A	G	0.313	cg27665808	2	232055229	0.50732	10.91	0.05746	7.25e-26	N	Adolescence	0.60051	13.2086	0.06172	2.6e-36
rs9770334	7	64959260	C	T	0.487	cg12143784	7	64541923	-0.48887	-10.9097	0.02355	7.27e-26	N	Childhood	-0.5352	-13.3997	0.01997	3.24e-37
rs1255406	10	42979254	T	C	0.373	cg16633951	10	42971575	0.47156	10.9071	0.04892	7.45e-26	N	Adolescence	0.47375	11.1638	0.04151	4.54e-27
rs10274919	7	64956181	C	T	0.477	cg12143784	7	64541923	-0.48521	-10.8996	0.0233	8e-26	N	Childhood	-0.52541	-13.2289	0.01932	2.14e-36
rs11763981	7	64952374	T	C	0.477	cg12143784	7	64541923	-0.48521	-10.8996	0.0233	8e-26	N	Childhood	-0.52541	-13.2289	0.01932	2.14e-36
rs35174746	7	64966064	I	R	0.477	cg12143784	7	64541923	-0.48521	-10.8996	0.0233	8e-26	N	Childhood	-0.52541	-13.2289	0.01932	2.14e-36
rs4718248	7	64951818	G	A	0.477	cg12143784	7	64541923	-0.48521	-10.8996	0.0233	8e-26	N	Childhood	-0.52541	-13.2289	0.01932	2.14e-36
rs9691010	7	64960031	T	C	0.477	cg12143784	7	64541923	-0.48521	-10.8996	0.0233	8e-26	N	Childhood	-0.52541	-13.2289	0.01932	2.14e-36
rs2505811	10	42872833	C	G	0.414	cg04395798	10	42971732	-0.46873	-10.8939	0.03165	8.45e-26	N	Adolescence	-0.46466	-11.0955	0.02719	8.84e-27
rs10751398	10	42693948	C	T	0.482	cg04395798	10	42971732	0.46945	10.8932	0.03368	8.51e-26	N	Adolescence	0.45329	10.8074	0.0282	1.43e-25
rs62126286	19	50396546	T	A	0.237	cg10751382	19	50391554	0.52563	10.8928	0.14598	8.54e-26	N	Adolescence	0.53185	11.0195	0.06222	1.85e-26
rs62126286	19	50396546	T	A	0.237	cg10751382	19	50391554	0.52563	10.8928	0.14598	8.54e-26	N	Childhood	0.59867	12.7868	0.08922	2.61e-34
rs2489687	10	42873205	T	C	0.404	cg16633951	10	42971575	-0.46946	-10.887	0.0426	9.03e-26	N	Adolescence	-0.49841	-12.0385	0.04472	6.82e-31
rs2489687	10	42873205	T	C	0.404	cg16633951	10	42971575	-0.46946	-10.887	0.0426	9.03e-26	N	Childhood	-0.51338	-12.9995	0.04772	2.62e-35
rs2505832	10	42820806	T	C	0.415	cg04395798	10	42971732	-0.47213	-10.8849	0.03155	9.21e-26	N	Adolescence	-0.46707	-11.0595	0.02705	1.25e-26
rs2505832	10	42820806	T	C	0.415	cg04395798	10	42971732	-0.47213	-10.8849	0.03155	9.21e-26	N	Childhood	-0.48074	-11.469	0.03321	2.25e-28
rs10899976	10	42794125	T	G	0.488	cg16633951	10	42971575	0.47117	10.8689	0.05048	1.07e-25	N	Adolescence	0.50083	12.1387	0.04577	2.42e-31
rs2201904	10	42427832	T	C	0.408	cg16633951	10	42971575	-0.46688	-10.8634	0.04363	1.13e-25	N	Childhood	-0.5429	-13.9062	0.05092	1.11e-39
rs11761736	7	64777890	G	C	0.498	cg12143784	7	64541923	0.48367	10.8537	0.02278	1.24e-25	N	Childhood	0.54299	13.7997	0.02006	3.7e-39
rs11764005	7	64788377	A	G	0.498	cg12143784	7	64541923	0.48367	10.8537	0.02278	1.24e-25	N	Childhood	0.54299	13.7997	0.02006	3.7e-39
rs11765265	7	64799139	C	T	0.498	cg12143784	7	64541923	0.48367	10.8537	0.02278	1.24e-25	N	Childhood	0.54299	13.7997	0.02006	3.7e-39
rs28863832	7	64797183	G	C	0.498	cg12143784	7	64541923	0.48367	10.8537	0.02278	1.24e-25	N	Childhood	0.54299	13.7997	0.02006	3.7e-39
rs6460237	7	64802973	G	T	0.498	cg12143784	7	64541923	0.48367	10.8537	0.02278	1.24e-25	N	Childhood	0.54299	13.7997	0.02006	3.7e-39
rs7784914	7	64777556	C	T	0.498	cg12143784	7	64541923	0.48367	10.8537	0.02278	1.24e-25	N	Childhood	0.54299	13.7997	0.02006	3.7e-39
rs7905348	10	42607955	T	G	0.45	cg04395798	10	42971732	-0.47379	-10.8528	0.03397	1.25e-25	N	Childhood	-0.52028	-12.4996	0.03662	5.6e-33
rs7908581	10	42607956	T	C	0.45	cg04395798	10	42971732	-0.47379	-10.8528	0.03397	1.25e-25	N	Childhood	-0.52028	-12.4996	0.03662	5.6e-33
rs9702482	10	42460509	G	T	0.421	cg04395798	10	42971732	-0.45974	-10.8351	0.03218	1.48e-25	N	Childhood	-0.47636	-11.5197	0.03409	1.36e-28
rs9702870	10	42460511	C	A	0.421	cg04395798	10	42971732	-0.45974	-10.8351	0.03218	1.48e-25	N	Childhood	-0.47636	-11.5197	0.03409	1.36e-28
rs7603942	2	231957261	A	C	0.314	cg27665808	2	232055229	0.50302	10.8334	0.05586	1.5e-25	N	Adolescence	0.59284	13.0402	0.06185	1.64e-35
rs7604219	2	231957324	A	G	0.314	cg27665808	2	232055229	0.50302	10.8334	0.05586	1.5e-25	N	Adolescence	0.59284	13.0402	0.06185	1.64e-35
rs10199752	2	231969554	C	A	0.314	cg27665808	2	232055229	0.50277	10.8271	0.05586	1.59e-25	N	Adolescence	0.59896	13.2028	0.05902	2.77e-36
rs60440887	2	231968815	I	R	0.314	cg27665808	2	232055229	0.50277	10.8271	0.05586	1.59e-25	N	Adolescence	0.59896	13.2028	0.05902	2.77e-36
rs10908981	10	42514721	A	T	0.42	cg04395798	10	42971732	-0.4602	-10.8264	0.03232	1.6e-25	N	Childhood	-0.48059	-11.6171	0.03423	5.11e-29
rs12623587	2	232160554	A	C	0.303	cg27665808	2	232055229	0.5101	10.8147	0.06134	1.79e-25	N	Adolescence	0.58797	12.8856	0.06367	8.8e-35
rs55782278	2	232154412	A	G	0.303	cg27665808	2	232055229	0.50993	10.8106	0.0609	1.86e-25	N	Adolescence	0.58623	12.8399	0.06367	1.44e-34
rs12617646	2	231923053	T	C	0.315	cg27665808	2	232055229	0.49928	10.809	0.05578	1.89e-25	N	Adolescence	0.59181	13.0936	0.05801	9.17e-36
rs13416929	2	231931216	A	G	0.315	cg27665808	2	232055229	0.49928	10.809	0.05578	1.89e-25	N	Adolescence	0.59181	13.0936	0.05801	9.17e-36
rs2161891	2	231954091	G	A	0.315	cg27665808	2	232055229	0.49928	10.809	0.05578	1.89e-25	N	Adolescence	0.59181	13.0936	0.05801	9.17e-36
rs2303357	2	231949946	A	G	0.315	cg27665808	2	232055229	0.49928	10.809	0.05578	1.89e-25	N	Adolescence	0.59181	13.0936	0.05801	9.17e-36
rs35167435	2	231929630	D	R	0.315	cg27665808	2	232055229	0.49928	10.809	0.05578	1.89e-25	N	Adolescence	0.59181	13.0936	0.05801	9.17e-36
rs3815844	2	231927569	T	G	0.315	cg27665808	2	232055229	0.49928	10.809	0.05578	1.89e-25	N	Adolescence	0.59181	13.0936	0.05801	9.17e-36
rs6746156	2	231967210	G	A	0.315	cg27665808	2	232055229	0.49928	10.809	0.05578	1.89e-25	N	Adolescence	0.59181	13.0936	0.05801	9.17e-36
rs7581418	2	231930566	A	G	0.315	cg27665808	2	232055229	0.49928	10.809	0.05578	1.89e-25	N	Adolescence	0.59181	13.0936	0.05801	9.17e-36
rs6707708	2	232020821	C	T	0.314	cg27665808	2	232055229	0.50202	10.8085	0.05572	1.9e-25	N	Adolescence	0.59423	13.077	0.05875	1.1e-35
rs6437000	2	231977527	A	C	0.288	cg27665808	2	232055229	0.51362	10.8073	0.06106	1.92e-25	N	Adolescence	0.63693	13.8975	0.06722	1.19e-39
rs12694886	2	231923559	C	T	0.316	cg27665808	2	232055229	0.49927	10.8039	0.05585	1.99e-25	N	Adolescence	0.59026	13.04	0.05801	1.65e-35
rs13411316	2	231948801	A	G	0.316	cg27665808	2	232055229	0.49927	10.8039	0.05585	1.99e-25	N	Adolescence	0.59239	13.103	0.05805	8.28e-36
rs13430145	2	231931133	C	T	0.316	cg27665808	2	232055229	0.49927	10.8039	0.05585	1.99e-25	N	Adolescence	0.59239	13.103	0.05805	8.28e-36
rs2007131	2	231947432	A	C	0.316	cg27665808	2	232055229	0.49927	10.8039	0.05585	1.99e-25	N	Adolescence	0.59239	13.103	0.05805	8.28e-36
rs2288147	2	231937505	G	A	0.316	cg27665808	2	232055229	0.49927	10.8039	0.05585	1.99e-25	N	Adolescence	0.59239	13.103	0.05805	8.28e-36
rs3769990	2	231927665	A	G	0.316	cg27665808	2	232055229	0.49927	10.8039	0.05585	1.99e-25	N	Adolescence	0.59239	13.103	0.05805	8.28e-36
rs60563689	2	231940592	G	A	0.316	cg27665808	2	232055229	0.49927	10.8039	0.05585	1.99e-25	N	Adolescence	0.59239	13.103	0.05805	8.28e-36
rs6741145	2	231941252	G	A	0.316	cg27665808	2	232055229	0.49927	10.8039	0.05585	1.99e-25	N	Adolescence	0.59239	13.103	0.05805	8.28e-36
rs7595464	2	231967610	G	A	0.316	cg27665808	2	232055229	0.49927	10.8039	0.05585	1.99e-25	N	Adolescence	0.59239	13.103	0.05805	8.28e-36
rs906879	2	231948178	G	A	0.316	cg27665808	2	232055229	0.49927	10.8039	0.05585	1.99e-25	N	Adolescence	0.59239	13.103	0.05805	8.28e-36
rs2335068	10	42427074	A	C	0.455	cg04395798	10	42971732	-0.47162	-10.8018	0.03402	2.02e-25	N	Childhood	-0.5146	-12.3397	0.03648	3.02e-32
rs12622630	2	232152297	G	A	0.276	cg27665808	2	232055229	0.51823	10.8001	0.05975	2.06e-25	N	Childhood	0.61193	13.3933	0.05082	3.48e-37
rs11893395	2	232022981	A	G	0.313	cg27665808	2	232055229	0.50281	10.7982	0.05731	2.09e-25	N	Adolescence	0.60087	13.2181	0.06172	2.34e-36
rs4350740	2	232018979	G	C	0.313	cg27665808	2	232055229	0.50281	10.7982	0.05731	2.09e-25	N	Adolescence	0.60087	13.2181	0.06172	2.34e-36
rs3731779	2	232158885	T	C	0.304	cg27665808	2	232055229	0.5095	10.7962	0.06119	2.13e-25	N	Adolescence	0.5869	12.8528	0.06369	1.25e-34
rs1549339	2	231982826	A	G	0.312	cg27665808	2	232055229	0.50403	10.7937	0.05883	2.19e-25	N	Adolescence	0.59663	13.0646	0.06434	1.26e-35
rs7565408	2	231996576	A	G	0.313	cg27665808	2	232055229	0.50278	10.7928	0.05738	2.2e-25	N	Adolescence	0.60144	13.2275	0.06185	2.11e-36
rs627285	7	64728973	T	G	0.497	cg12143784	7	64541923	-0.47864	-10.7748	0.02275	2.61e-25	N	Childhood	-0.53551	-13.6321	0.01959	2.43e-38
rs1255369	10	42984386	T	G	0.351	cg04395798	10	42971732	0.46897	10.7731	0.03777	2.65e-25	N	Adolescence	0.53562	12.727	0.03378	4.85e-34
rs79471398	14	104384405	T	C	0.032	cg22994272	14	104346241	1.27383	10.7713	0	2.7e-25	N	Childhood	0.5839	6.23716	0	7.08e-10
rs7905461	10	42608040	C	G	0.449	cg04395798	10	42971732	-0.47018	-10.7709	0.03341	2.71e-25	N	Childhood	-0.51452	-12.3638	0.03638	2.35e-32
rs7905474	10	42608071	T	G	0.449	cg04395798	10	42971732	-0.47018	-10.7709	0.03341	2.71e-25	N	Childhood	-0.51452	-12.3638	0.03638	2.35e-32
rs7905476	10	42608072	T	G	0.449	cg04395798	10	42971732	-0.47018	-10.7709	0.03341	2.71e-25	N	Childhood	-0.51452	-12.3638	0.03638	2.35e-32
rs149218729	7	64969592	D	R	0.477	cg12143784	7	64541923	-0.48553	-10.7684	0.02334	2.78e-25	N	Childhood	-0.51974	-12.8494	0.01924	1.33e-34
rs202092097	10	42774684	D	R	0.436	cg04395798	10	42971732	-0.48068	-10.7676	0.03356	2.8e-25	N	Adolescence	-0.47134	-10.9196	0.02829	4.86e-26
rs1916121	10	42504463	T	A	0.418	cg04395798	10	42971732	-0.45914	-10.7662	0.03238	2.83e-25	N	Childhood	-0.48135	-11.606	0.03382	5.71e-29
rs10252247	7	64712708	A	G	0.499	cg12143784	7	64541923	-0.47957	-10.7654	0.02278	2.85e-25	N	Childhood	-0.54019	-13.735	0.01978	7.67e-39
rs10280883	7	64717348	C	T	0.499	cg12143784	7	64541923	-0.47957	-10.7654	0.02278	2.85e-25	N	Childhood	-0.54019	-13.735	0.01978	7.67e-39
rs10949981	7	64725982	T	C	0.499	cg12143784	7	64541923	-0.47957	-10.7654	0.02278	2.85e-25	N	Childhood	-0.54019	-13.735	0.01978	7.67e-39
rs112871500	7	64717656	C	T	0.499	cg12143784	7	64541923	-0.47957	-10.7654	0.02278	2.85e-25	N	Childhood	-0.54019	-13.735	0.01978	7.67e-39
rs551599	7	64703295	T	C	0.499	cg12143784	7	64541923	-0.47957	-10.7654	0.02278	2.85e-25	N	Childhood	-0.54019	-13.735	0.01978	7.67e-39
rs575433	7	64703012	C	A	0.499	cg12143784	7	64541923	-0.47957	-10.7654	0.02278	2.85e-25	N	Childhood	-0.54019	-13.735	0.01978	7.67e-39
rs616377	7	64704885	T	C	0.499	cg12143784	7	64541923	-0.47957	-10.7654	0.02278	2.85e-25	N	Childhood	-0.54019	-13.735	0.01978	7.67e-39
rs7784428	7	64726682	T	C	0.499	cg12143784	7	64541923	-0.47957	-10.7654	0.02278	2.85e-25	N	Childhood	-0.54019	-13.735	0.01978	7.67e-39
rs7785812	7	64715057	C	G	0.499	cg12143784	7	64541923	-0.47957	-10.7654	0.02278	2.85e-25	N	Childhood	-0.54019	-13.735	0.01978	7.67e-39
rs80258003	7	64717555	T	C	0.499	cg12143784	7	64541923	-0.47957	-10.7654	0.02278	2.85e-25	N	Childhood	-0.54019	-13.735	0.01978	7.67e-39
rs2091227	7	64409654	A	G	0.468	cg12143784	7	64541923	-0.4801	-10.76	0.02226	3e-25	N	Adolescence	-0.57104	-13.8709	0.01649	1.6e-39
rs113487457	10	42520296	D	R	0.462	cg16633951	10	42971575	0.4649	10.7535	0.05044	3.2e-25	N	Childhood	0.54685	14.0323	0.05328	2.64e-40
rs9665316	10	42523239	T	C	0.462	cg16633951	10	42971575	0.4649	10.7535	0.05044	3.2e-25	N	Childhood	0.54685	14.0323	0.05328	2.64e-40
rs139005463	7	64970126	D	R	0.479	cg12143784	7	64541923	-0.4815	-10.7408	0.02361	3.6e-25	N	Childhood	-0.53793	-13.5338	0.01949	7.3e-38
rs10900295	10	42691595	T	C	0.483	cg16633951	10	42971575	0.46464	10.7402	0.04862	3.62e-25	N	Adolescence	0.49567	12.0373	0.04552	6.91e-31
rs4481985	10	42683478	C	T	0.49	cg16633951	10	42971575	0.4641	10.7341	0.05001	3.83e-25	N	Adolescence	0.49857	12.0768	0.04528	4.59e-31
rs2489687	10	42873205	T	C	0.404	cg04395798	10	42971732	-0.46338	-10.7338	0.0317	3.84e-25	N	Adolescence	-0.45438	-10.7562	0.02705	2.32e-25
rs2489687	10	42873205	T	C	0.404	cg04395798	10	42971732	-0.46338	-10.7338	0.0317	3.84e-25	N	Childhood	-0.46345	-11.0555	0.03146	1.32e-26
rs1255404	10	42978025	T	G	0.427	cg04395798	10	42971732	0.45941	10.733	0.03531	3.88e-25	N	Adolescence	0.51051	12.3598	0.03321	2.4e-32
rs76972515	10	42486831	A	G	0.477	cg04395798	10	42971732	-0.46847	-10.7328	0.0345	3.88e-25	N	Adolescence	-0.45734	-10.77	0.02644	2.04e-25
rs2072451	19	50299408	G	T	0.496	cg14071503	19	50391752	0.45279	10.7299	0.04204	3.99e-25	N	Adolescence	0.39748	10.087	0.0199	1.18e-22
rs1589585	10	42514323	G	A	0.418	cg04395798	10	42971732	-0.45541	-10.7289	0.03207	4.03e-25	N	Childhood	-0.47461	-11.4812	0.03364	1.99e-28
rs10498257	2	231993038	T	A	0.312	cg27665808	2	232055229	0.50115	10.7227	0.05883	4.27e-25	N	Adolescence	0.59989	13.1505	0.06455	4.92e-36
rs59886388	2	231995770	C	G	0.312	cg27665808	2	232055229	0.50115	10.7227	0.05883	4.27e-25	N	Adolescence	0.59989	13.1505	0.06455	4.92e-36
rs7607338	2	231987955	A	C	0.312	cg27665808	2	232055229	0.50115	10.7227	0.05883	4.27e-25	N	Adolescence	0.59989	13.1505	0.06455	4.92e-36
rs765458	2	231990667	A	G	0.312	cg27665808	2	232055229	0.50115	10.7227	0.05883	4.27e-25	N	Adolescence	0.59989	13.1505	0.06455	4.92e-36
rs201792151	10	42789755	I	R	0.493	cg16633951	10	42971575	0.47036	10.7195	0.04646	4.4e-25	N	Childhood	0.52565	13.1714	0.05025	4.02e-36
rs34621273	10	42789756	I	R	0.493	cg16633951	10	42971575	0.47036	10.7195	0.04646	4.4e-25	N	Childhood	0.52565	13.1714	0.05025	4.02e-36
rs10751398	10	42693948	C	T	0.482	cg16633951	10	42971575	0.46324	10.7184	0.04851	4.45e-25	N	Adolescence	0.49529	12.0425	0.04528	6.55e-31
rs13418542	2	232156837	T	C	0.276	cg27665808	2	232055229	0.51655	10.7182	0.05993	4.45e-25	N	Childhood	0.60986	13.2869	0.05084	1.13e-36
rs13428268	2	232155641	G	T	0.276	cg27665808	2	232055229	0.51655	10.7182	0.05993	4.45e-25	N	Childhood	0.60986	13.2869	0.05084	1.13e-36
rs3731781	2	232159243	G	A	0.276	cg27665808	2	232055229	0.51655	10.7182	0.05993	4.45e-25	N	Childhood	0.60986	13.2869	0.05084	1.13e-36
rs62197352	2	232165233	G	C	0.276	cg27665808	2	232055229	0.51655	10.7182	0.05993	4.45e-25	N	Childhood	0.60986	13.2869	0.05084	1.13e-36
rs4300351	10	42783481	G	T	0.487	cg16633951	10	42971575	0.4672	10.7129	0.05038	4.68e-25	N	Adolescence	0.50107	12.0931	0.04448	3.88e-31
rs2466467	10	42835573	C	T	0.394	cg16633951	10	42971575	-0.46732	-10.6911	0.04268	5.75e-25	N	Adolescence	-0.49051	-11.6137	0.04565	5.2e-29
rs2505826	10	42837807	T	C	0.394	cg16633951	10	42971575	-0.46732	-10.6911	0.04268	5.75e-25	N	Adolescence	-0.49051	-11.6137	0.04565	5.2e-29
rs2954824	10	42836036	C	G	0.394	cg16633951	10	42971575	-0.46732	-10.6911	0.04268	5.75e-25	N	Adolescence	-0.49051	-11.6137	0.04565	5.2e-29
rs4046203	10	42464488	C	T	0.499	cg04395798	10	42971732	-0.46503	-10.6896	0.0327	5.83e-25	N	Childhood	-0.50157	-12.0077	0.03546	9.55e-31
rs2335057	10	42445690	T	G	0.448	cg04395798	10	42971732	0.4623	10.6746	0.03304	6.71e-25	N	Adolescence	0.43835	10.3852	0.02549	7.62e-24
rs12775714	10	42468995	G	A	0.495	cg04395798	10	42971732	-0.46619	-10.6699	0.03314	7.01e-25	N	Childhood	-0.50282	-11.9877	0.03547	1.17e-30
rs1851486	10	42466083	C	G	0.495	cg04395798	10	42971732	-0.46619	-10.6699	0.03314	7.01e-25	N	Childhood	-0.50282	-11.9877	0.03547	1.17e-30
rs1851487	10	42465910	G	T	0.495	cg04395798	10	42971732	-0.46619	-10.6699	0.03314	7.01e-25	N	Childhood	-0.50282	-11.9877	0.03547	1.17e-30
rs2173464	10	42454325	A	G	0.495	cg04395798	10	42971732	-0.46619	-10.6699	0.03314	7.01e-25	N	Childhood	-0.50282	-11.9877	0.03547	1.17e-30
rs2334908	10	42464851	G	A	0.495	cg04395798	10	42971732	-0.46619	-10.6699	0.03314	7.01e-25	N	Childhood	-0.50282	-11.9877	0.03547	1.17e-30
rs9663767	10	42465110	G	A	0.495	cg04395798	10	42971732	-0.46619	-10.6699	0.03314	7.01e-25	N	Childhood	-0.50282	-11.9877	0.03547	1.17e-30
rs9664992	10	42465706	T	A	0.495	cg04395798	10	42971732	-0.46619	-10.6699	0.03314	7.01e-25	N	Childhood	-0.50282	-11.9877	0.03547	1.17e-30
rs9663798	10	42424756	C	T	0.491	cg16633951	10	42971575	-0.44663	-10.6568	0.04869	7.93e-25	N	Adolescence	-0.46286	-11.4413	0.04116	2.92e-28
rs1255376	10	42995069	T	G	0.35	cg04395798	10	42971732	0.4652	10.6544	0.03768	8.11e-25	N	Adolescence	0.53446	12.6714	0.03319	8.8e-34
rs12767637	10	42463891	T	C	0.486	cg16633951	10	42971575	0.46119	10.6508	0.04588	8.38e-25	N	Childhood	0.51848	13.1394	0.05047	5.7e-36
rs753855	2	232066651	C	T	0.46	cg07929768	2	232055508	0.45376	10.644	0.02378	8.93e-25	N	Childhood	0.50187	12.9999	0.05257	2.61e-35
rs151072462	10	42487558	A	C	0.436	cg04395798	10	42971732	-0.45138	-10.6335	0.03212	9.85e-25	N	Adolescence	-0.45035	-10.7708	0.02749	2.02e-25
rs2091228	7	64409809	A	G	0.459	cg12143784	7	64541923	-0.46562	-10.6218	0.02145	1.1e-24	N	Childhood	-0.49237	-12.4519	0.01772	9.27e-33
rs6606611	10	42784973	C	T	0.486	cg16633951	10	42971575	0.46261	10.5905	0.04967	1.47e-24	N	Adolescence	0.49584	11.9436	0.0433	1.81e-30
rs11493016	10	42504967	T	C	0.446	cg16633951	10	42971575	0.45864	10.5747	0.05001	1.71e-24	N	Adolescence	0.47717	11.4123	0.04058	3.9e-28
rs2505799	10	42856194	G	T	0.394	cg04395798	10	42971732	-0.47254	-10.5701	0.03087	1.78e-24	N	Childhood	-0.48316	-11.2417	0.03075	2.14e-27
rs200823560	2	232102485	D	R	0.186	cg27665808	2	232055229	0.58248	10.5572	0.06432	2.01e-24	N	Adolescence	0.65502	12.1932	0.0549	1.37e-31
rs200823560	2	232102485	D	R	0.186	cg27665808	2	232055229	0.58248	10.5572	0.06432	2.01e-24	N	Childhood	0.55006	10.2003	0.04961	4.23e-23
rs4486580	10	42618584	T	C	0.452	cg04395798	10	42971732	0.45244	10.5531	0.03362	2.09e-24	N	Childhood	0.44963	10.8079	0.03358	1.44e-25
rs201752257	7	64647344	D	R	0.49	cg12143784	7	64541923	-0.47456	-10.5477	0.02201	2.19e-24	N	Childhood	-0.53887	-13.5169	0.01971	8.82e-38
rs113343758	14	104491479	T	C	0.031	cg22994272	14	104346241	1.26198	10.5444	0	2.26e-24	N	Childhood	0.57249	6.00078	0	2.93e-09
rs8104825	19	50315423	A	G	0.435	cg14071503	19	50391752	0.44712	10.544	0.04608	2.27e-24	N	Adolescence	0.39072	9.90069	0.01908	6.31e-22
rs8104825	19	50315423	A	G	0.435	cg14071503	19	50391752	0.44712	10.544	0.04608	2.27e-24	N	Childhood	0.41112	10.8361	0.02583	1.1e-25
rs7803783	7	64899223	G	C	0.493	cg12143784	7	64541923	0.46911	10.5429	0.02278	2.29e-24	N	Childhood	0.53483	13.6053	0.01969	3.29e-38
rs10909022	10	42454909	T	C	0.497	cg04395798	10	42971732	-0.46037	-10.5343	0.03234	2.48e-24	N	Childhood	-0.49725	-11.851	0.03542	4.76e-30
rs11668716	19	50392014	A	T	0.166	cg10751382	19	50391554	0.59765	10.5331	0.1474	2.51e-24	N	Adolescence	0.56773	9.91233	0.05843	5.68e-22
rs11668716	19	50392014	A	T	0.166	cg10751382	19	50391554	0.59765	10.5331	0.1474	2.51e-24	N	Childhood	0.6278	11.2267	0.08804	2.48e-27
rs7794134	7	64647345	T	A	0.492	cg12143784	7	64541923	-0.47126	-10.5319	0.02145	2.54e-24	N	Childhood	-0.53688	-13.5652	0.01959	5.14e-38
rs11265991	10	42474236	A	C	0.446	cg16633951	10	42971575	0.45766	10.5293	0.05102	2.6e-24	N	Childhood	0.52812	13.3488	0.04973	5.7e-37
rs11266016	10	42493360	T	C	0.446	cg16633951	10	42971575	0.45766	10.5293	0.05102	2.6e-24	N	Childhood	0.52812	13.3488	0.04973	5.7e-37
rs11528797	10	42482077	T	G	0.446	cg16633951	10	42971575	0.45766	10.5293	0.05102	2.6e-24	N	Childhood	0.52812	13.3488	0.04973	5.7e-37
rs1589591	10	42498338	T	C	0.446	cg16633951	10	42971575	0.45766	10.5293	0.05102	2.6e-24	N	Childhood	0.52812	13.3488	0.04973	5.7e-37
rs1603829	10	42457394	C	A	0.446	cg16633951	10	42971575	0.45766	10.5293	0.05102	2.6e-24	N	Childhood	0.52812	13.3488	0.04973	5.7e-37
rs1603833	10	42493857	A	G	0.446	cg16633951	10	42971575	0.45766	10.5293	0.05102	2.6e-24	N	Childhood	0.52812	13.3488	0.04973	5.7e-37
rs34874577	10	42451341	A	G	0.446	cg16633951	10	42971575	0.45766	10.5293	0.05102	2.6e-24	N	Childhood	0.52812	13.3488	0.04973	5.7e-37
rs11266156	10	42422948	A	G	0.397	cg16633951	10	42971575	-0.45617	-10.5219	0.04248	2.79e-24	N	Childhood	-0.5252	-13.3326	0.05071	6.81e-37
rs9801280	7	64429417	T	C	0.456	cg12143784	7	64541923	-0.46339	-10.5206	0.02128	2.82e-24	N	Childhood	-0.48948	-12.332	0.01711	3.28e-32
[truncated: 704 more rows]

## Sheet: S6. mQTLs, cord blood+mothers
Supplemental Table S6. Results from overlap with mQTLs appearing both in cord blood and in peripheral blood in mothers and with significantly different methylation sites in Lifestyle intervention vs. Control group (TOP-study), combined with public GWAS data
[truncated: 336 more rows]

[truncated: 6 more sheets: S7. mQTLs in EWAS, S8. GWAS, S9. LM, Lean Mass (%), S10. LMM, zBMI, S11. MZTwin cohort, characteris, S12. MZ Twin cohort CorrData]
