# Supplementary material
Source: publisher figshare collection journal article supplement (https://diabetesjournals.figshare.com/articles/dataset/_/13501587)

**A**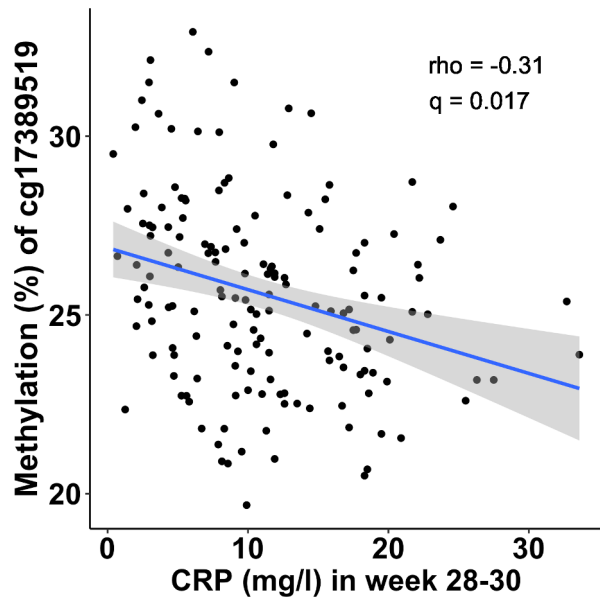**B**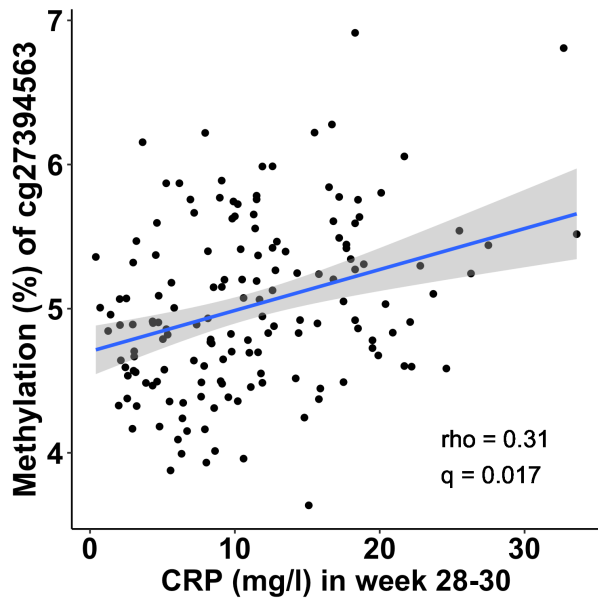

Supplement: Supplementary file 2 [file 1]
